# Supplementary material for: Transcriptome analysis of hexaploid hulless oat in response to salinity stress
Source: PLoS One. 2017 Feb 13;12(2):e0171451. doi: 10.1371/journal.pone.0171451 (PMC5305263; doi:10.1371/journal.pone.0171451)
Supplement: S8 File — PUTs with absolute value of |log2Ratio| > 1 and FDR < 0.05 were identified as DEGs. (XLSX) [file pone.0171451.s009.xlsx]

## Sheet: A1 vs A2
GeneID	Length (bp)	CK-Expression	Salt Stressed Expression	CK Expression normalized	Salt Stressed Expression normalized	log2 Ratio	Up/Down(HT/HCK)	P-value	FDR
CL16183.Contig1_All	1836	0	608	0	15.202	13.892	Up	1.28927e-180	4.24749e-178
Unigene35375_All	433	0	95	0	10.0718	13.298	Up	7.8811e-29	3.95389e-27
Unigene35242_All	799	0	160	0	9.1927	13.1663	Up	4.61756e-48	3.74447e-46
Unigene35373_All	1536	0	275	0	8.2188	13.0047	Up	4.34766e-82	5.77022e-80
CL3361.Contig2_All	1303	0	224	0	7.8917	12.9461	Up	5.34708e-67	5.97509e-65
CL3162.Contig12_All	287	0	46	0	7.3578	12.8451	Up	2.48134e-14	6.52346e-13
Unigene34980_All	330	0	51	0	7.0946	12.7925	Up	8.22792e-16	2.38052e-14
CL5329.Contig12_All	1184	0	177	0	6.8626	12.7445	Up	4.30982e-53	3.85994e-51
CL14245.Contig4_All	502	0	75	0	6.8585	12.7437	Up	6.51898e-23	2.6247e-21
Unigene35316_All	500	0	67	0	6.1514	12.5867	Up	1.51781e-20	5.59838e-19
Unigene35187_All	417	0	55	0	6.0547	12.5638	Up	5.39226e-17	1.66786e-15
Unigene10121_All	442	0	57	0	5.92	12.5314	Up	1.38042e-17	4.39453e-16
Unigene36303_All	329	0	42	0	5.8603	12.5168	Up	3.78622e-13	9.16485e-12
CL1541.Contig6_All	352	0	43	0	5.6078	12.4532	Up	1.9157e-13	4.73087e-12
CL14388.Contig1_All	714	0	85	0	5.465	12.416	Up	7.16776e-26	3.25071e-24
CL2211.Contig6_All	1018	0	121	0	5.4564	12.4137	Up	1.59852e-36	1.00611e-34
Unigene43274_All	240	0	27	0	5.1644	12.3344	Up	1.03849e-08	1.73475e-07
CL11972.Contig2_All	304	0	34	0	5.1342	12.3259	Up	8.81542e-11	1.78955e-09
CL11836.Contig1_All	1963	0	219	0	5.1215	12.3224	Up	1.61255e-65	1.76125e-63
CL2855.Contig5_All	732	0	81	0	5.0798	12.3106	Up	1.09371e-24	4.7619e-23
CL4928.Contig4_All	811	0	89	0	5.0378	12.2986	Up	4.69748e-27	2.22295e-25
CL3162.Contig11_All	286	0	31	0	4.9758	12.2807	Up	6.80584e-10	1.27916e-08
CL2501.Contig4_All	798	0	85	0	4.8897	12.2555	Up	7.16776e-26	3.24949e-24
CL3728.Contig3_All	414	0	44	0	4.8789	12.2523	Up	9.69276e-14	2.44764e-12
Unigene35356_All	972	0	100	0	4.7228	12.2054	Up	2.6133e-30	1.37199e-28
CL1269.Contig1_All	567	0	58	0	4.6959	12.1972	Up	6.98446e-18	2.26523e-16
Unigene35347_All	796	0	79	0	4.556	12.1536	Up	4.27228e-24	1.81757e-22
Unigene13216_All	697	0	69	0	4.5445	12.1499	Up	3.88558e-21	1.46674e-19
Unigene35431_All	412	0	37	0	4.1226	12.0093	Up	1.14184e-11	2.48171e-10
CL14176.Contig2_All	239	0	21	0	4.0336	11.9779	Up	6.18982e-07	8.34428e-06
CL15289.Contig1_All	732	0	64	0	4.0136	11.9707	Up	1.1718e-19	4.1634e-18
CL4969.Contig2_All	231	0	20	0	3.9745	11.9566	Up	1.22337e-06	1.57591e-05
Unigene35403_All	603	0	51	0	3.8826	11.9228	Up	8.22792e-16	2.37996e-14
CL14388.Contig2_All	973	0	82	0	3.8687	11.9176	Up	5.53378e-25	2.43213e-23
CL15196.Contig1_All	575	0	48	0	3.8322	11.904	Up	6.35226e-15	1.75032e-13
Unigene36863_All	378	0	31	0	3.7648	11.8784	Up	6.80584e-10	1.27836e-08
Unigene43010_All	233	0	19	0	3.7434	11.8701	Up	2.4179e-06	2.99226e-05
Unigene35332_All	1709	0	139	0	3.7337	11.8664	Up	7.5489e-42	5.38162e-40
CL3823.Contig1_All	808	0	65	0	3.6929	11.8505	Up	5.92892e-20	2.13413e-18
CL8334.Contig3_All	537	0	43	0	3.6759	11.8439	Up	1.9157e-13	4.7299e-12
CL3728.Contig2_All	1178	0	94	0	3.6631	11.8388	Up	1.55764e-28	7.74069e-27
CL1238.Contig3_All	251	0	20	0	3.6578	11.8368	Up	1.22337e-06	1.57675e-05
Unigene35198_All	244	0	19	0	3.5746	11.8036	Up	2.4179e-06	2.99134e-05
Unigene35407_All	325	0	25	0	3.5312	11.7859	Up	4.05658e-08	6.32216e-07
Unigene15844_All	587	0	45	0	3.5192	11.781	Up	4.9042e-14	1.26484e-12
CL8666.Contig2_All	380	0	29	0	3.5034	11.7745	Up	2.65852e-09	4.72076e-08
CL16772.Contig4_All	591	0	45	0	3.4954	11.7712	Up	4.9042e-14	1.26457e-12
Unigene11903_All	2125	0	160	0	3.4565	11.7551	Up	4.61756e-48	3.74196e-46
CL12880.Contig1_All	572	0	43	0	3.451	11.7528	Up	1.9157e-13	4.73183e-12
CL15289.Contig2_All	750	0	54	0	3.3052	11.6905	Up	1.06574e-16	3.23273e-15
Unigene36601_All	336	0	23	0	3.1424	11.6177	Up	1.5846e-07	2.29945e-06
Unigene36407_All	1981	0	135	0	3.1284	11.6112	Up	1.15187e-40	7.97651e-39
Unigene35232_All	1278	0	87	0	3.1251	11.6097	Up	1.83495e-26	8.51669e-25
Unigene53957_All	225	0	15	0	3.0604	11.5795	Up	3.6894e-05	0.000372944
Unigene35372_All	270	0	18	0	3.0604	11.5795	Up	4.77878e-06	5.65189e-05
Unigene35724_All	241	0	16	0	3.0477	11.5735	Up	1.86671e-05	0.000199593
Unigene35418_All	703	0	46	0	3.0038	11.5526	Up	2.48134e-14	6.52488e-13
Unigene35183_All	260	0	17	0	3.0015	11.5515	Up	9.44488e-06	0.000106467
Unigene35305_All	476	0	31	0	2.9897	11.5458	Up	6.80584e-10	1.27896e-08
CL5739.Contig2_All	431	0	28	0	2.9823	11.5422	Up	5.25438e-09	9.05368e-08
Unigene35417_All	361	0	23	0	2.9248	11.5141	Up	1.5846e-07	2.30001e-06
Unigene35320_All	601	0	38	0	2.9025	11.5031	Up	5.7773e-12	1.28381e-10
Unigene35415_All	526	0	33	0	2.88	11.4919	Up	1.7423e-10	3.44381e-09
CL8556.Contig2_All	273	0	17	0	2.8586	11.4811	Up	9.44488e-06	0.000106447
CL1727.Contig4_All	1086	0	67	0	2.8321	11.4677	Up	1.51781e-20	5.60009e-19
CL3162.Contig3_All	522	0	32	0	2.8142	11.4585	Up	3.44352e-10	6.63716e-09
Unigene36789_All	523	0	32	0	2.8088	11.4557	Up	3.44352e-10	6.64034e-09
CL13053.Contig2_All	556	0	34	0	2.8072	11.4549	Up	8.81542e-11	1.78925e-09
CL5225.Contig7_All	845	0	50	0	2.7163	11.4074	Up	1.62618e-15	4.62523e-14
Unigene1851_All	594	0	35	0	2.7049	11.4014	Up	4.4603e-11	9.28203e-10
CL4466.Contig2_All	306	0	18	0	2.7004	11.399	Up	4.77878e-06	5.653e-05
Unigene36371_All	549	0	32	0	2.6758	11.3858	Up	3.44352e-10	6.6414e-09
CL10796.Contig2_All	378	0	22	0	2.6718	11.3836	Up	3.13184e-07	4.38066e-06
Unigene35824_All	259	0	15	0	2.6586	11.3765	Up	3.6894e-05	0.000373225
CL16583.Contig1_All	619	0	35	0	2.5957	11.3419	Up	4.4603e-11	9.28363e-10
Unigene35685_All	446	0	25	0	2.5732	11.3293	Up	4.05658e-08	6.32297e-07
CL4554.Contig3_All	733	0	41	0	2.5677	11.3263	Up	7.48318e-13	1.77546e-11
Unigene36138_All	341	0	19	0	2.5578	11.3207	Up	2.4179e-06	2.99195e-05
Unigene35564_All	252	0	14	0	2.5503	11.3165	Up	7.29182e-05	0.000693822
Unigene35309_All	383	0	21	0	2.517	11.2975	Up	6.18982e-07	8.34056e-06
CL8455.Contig1_All	459	0	25	0	2.5003	11.2879	Up	4.05658e-08	6.32379e-07
Unigene13624_All	996	0	54	0	2.4889	11.2813	Up	1.06574e-16	3.23354e-15
Unigene36230_All	320	0	17	0	2.4388	11.252	Up	9.44488e-06	0.000106417
CL263.Contig4_All	793	0	42	0	2.4313	11.2475	Up	3.78622e-13	9.16302e-12
Unigene35437_All	362	0	19	0	2.4094	11.2345	Up	2.4179e-06	2.99164e-05
Unigene36351_All	326	0	17	0	2.3939	11.2251	Up	9.44488e-06	0.000106427
Unigene35704_All	499	0	26	0	2.3919	11.2239	Up	2.05248e-08	3.31368e-07
Unigene35353_All	653	0	34	0	2.3902	11.2229	Up	8.81542e-11	1.79015e-09
Unigene35438_All	948	0	49	0	2.3728	11.2124	Up	3.21402e-15	8.99539e-14
Unigene36793_All	332	0	17	0	2.3506	11.1988	Up	9.44488e-06	0.000106437
Unigene35896_All	294	0	15	0	2.3421	11.1936	Up	3.6894e-05	0.000373162
Unigene36122_All	278	0	14	0	2.3118	11.1748	Up	7.29182e-05	0.000694095
CL13679.Contig3_All	379	0	19	0	2.3014	11.1683	Up	2.4179e-06	2.99287e-05
Unigene35341_All	440	0	22	0	2.2953	11.1645	Up	3.13184e-07	4.37762e-06
Unigene6857_All	862	0	43	0	2.29	11.1611	Up	1.9157e-13	4.7328e-12
Unigene5780_All	763	0	38	0	2.2863	11.1588	Up	5.7773e-12	1.28358e-10
CL9981.Contig3_All	483	0	24	0	2.281	11.1555	Up	8.01752e-08	1.2054e-06
CL9856.Contig1_All	486	0	24	0	2.267	11.1466	Up	8.01752e-08	1.2057e-06
Unigene35386_All	345	0	17	0	2.262	11.1434	Up	9.44488e-06	0.000106477
CL8128.Contig4_All	630	0	31	0	2.2589	11.1414	Up	6.80584e-10	1.27856e-08
CL13078.Contig2_All	285	0	14	0	2.255	11.1389	Up	7.29182e-05	0.000694861
CL4726.Contig2_All	306	0	15	0	2.2503	11.1359	Up	3.6894e-05	0.000372913
Unigene19509_All	929	0	45	0	2.2236	11.1187	Up	4.9042e-14	1.26511e-12
Unigene35401_All	331	0	16	0	2.219	11.1157	Up	1.86671e-05	0.000199876
Unigene35705_All	374	0	18	0	2.2094	11.1094	Up	4.77878e-06	5.65134e-05
Unigene35073_All	355	0	17	0	2.1983	11.1022	Up	9.44488e-06	0.000106487
Unigene36714_All	293	0	14	0	2.1935	11.099	Up	7.29182e-05	0.000695683
CL7252.Contig2_All	613	0	29	0	2.1717	11.0846	Up	2.65852e-09	4.71729e-08
CL4969.Contig3_All	296	0	14	0	2.1712	11.0843	Up	7.29182e-05	0.00069519
Unigene35580_All	1646	0	77	0	2.1475	11.0684	Up	1.66886e-23	6.91496e-22
CL8128.Contig1_All	620	0	29	0	2.1472	11.0682	Up	2.65852e-09	4.71937e-08
CL3823.Contig4_All	323	0	15	0	2.1319	11.0579	Up	3.6894e-05	0.000373287
Unigene35321_All	584	0	27	0	2.1224	11.0515	Up	1.03849e-08	1.73451e-07
CL936.Contig2_All	412	0	19	0	2.117	11.0478	Up	2.4179e-06	2.99103e-05
CL15869.Contig1_All	543	0	25	0	2.1135	11.0454	Up	4.05658e-08	6.3246e-07
CL6816.Contig4_All	393	0	18	0	2.1026	11.038	Up	4.77878e-06	5.65742e-05
CL8937.Contig2_All	329	0	15	0	2.093	11.0314	Up	3.6894e-05	0.000372881
CL11642.Contig2_All	527	0	24	0	2.0906	11.0297	Up	8.01752e-08	1.20555e-06
Unigene36100_All	308	0	14	0	2.0866	11.0269	Up	7.29182e-05	0.00069508
CL13679.Contig2_All	464	0	21	0	2.0776	11.0207	Up	6.18982e-07	8.34335e-06
Unigene35089_All	398	0	18	0	2.0762	11.0197	Up	4.77878e-06	5.65576e-05
Unigene35506_All	354	0	16	0	2.0748	11.0188	Up	1.86671e-05	0.000199734
Unigene19879_All	487	0	22	0	2.0738	11.0181	Up	3.13184e-07	4.38117e-06
Unigene23008_All	444	0	20	0	2.0678	11.0139	Up	1.22337e-06	1.57659e-05
Unigene6669_All	467	0	21	0	2.0643	11.0114	Up	6.18982e-07	8.34242e-06
Unigene35660_All	315	0	14	0	2.0403	10.9946	Up	7.29182e-05	0.000695628
CL7449.Contig2_All	317	0	14	0	2.0274	10.9854	Up	7.29182e-05	0.000695354
CL5428.Contig10_All	1042	0	46	0	2.0266	10.9848	Up	2.48134e-14	6.52204e-13
Unigene36598_All	431	0	19	0	2.0237	10.9828	Up	2.4179e-06	2.99256e-05
CL8700.Contig1_All	1077	0	47	0	2.0033	10.9682	Up	1.25548e-14	3.37027e-13
Unigene36173_All	711	0	31	0	2.0015	10.9669	Up	6.80584e-10	1.27876e-08
CL9727.Contig2_All	1171	0	51	0	1.9993	10.9653	Up	8.22792e-16	2.37939e-14
CL15109.Contig1_All	597	0	26	0	1.9993	10.9653	Up	2.05248e-08	3.31235e-07
Unigene2225_All	886	0	38	0	1.9689	10.9432	Up	5.7773e-12	1.28334e-10
Unigene36081_All	541	0	23	0	1.9516	10.9304	Up	1.5846e-07	2.29973e-06
Unigene36241_All	428	0	18	0	1.9306	10.9148	Up	4.77878e-06	5.6541e-05
Unigene35236_All	361	0	15	0	1.9075	10.8975	Up	3.6894e-05	0.000373131
CL6718.Contig10_All	435	0	18	0	1.8996	10.8915	Up	4.77878e-06	5.65798e-05
CL7344.Contig2_All	387	0	16	0	1.8979	10.8902	Up	1.86671e-05	0.00019977
Unigene35363_All	630	0	26	0	1.8945	10.8876	Up	2.05248e-08	3.31279e-07
CL13974.Contig3_All	341	0	14	0	1.8847	10.8801	Up	7.29182e-05	0.000694204
CL3529.Contig10_All	390	0	16	0	1.8833	10.879	Up	1.86671e-05	0.000199805
Unigene36319_All	540	0	22	0	1.8702	10.869	Up	3.13184e-07	4.38168e-06
Unigene35426_All	789	0	32	0	1.8618	10.8625	Up	3.44352e-10	6.63822e-09
CL600.Contig1_All	346	0	14	0	1.8575	10.8591	Up	7.29182e-05	0.000694368
Unigene36177_All	371	0	15	0	1.856	10.858	Up	3.6894e-05	0.000373037
CL2527.Contig3_All	347	0	14	0	1.8521	10.8549	Up	7.29182e-05	0.000693876
Unigene35843_All	349	0	14	0	1.8415	10.8467	Up	7.29182e-05	0.000694532
Unigene36281_All	401	0	16	0	1.8317	10.839	Up	1.86671e-05	0.000199611
Unigene35346_All	677	0	27	0	1.8308	10.8383	Up	1.03849e-08	1.73427e-07
CL4928.Contig3_All	731	0	29	0	1.8212	10.8307	Up	2.65852e-09	4.72006e-08
Unigene10885_All	458	0	18	0	1.8042	10.8171	Up	4.77878e-06	5.65355e-05
Unigene7142_All	625	0	24	0	1.7628	10.7837	Up	8.01752e-08	1.20585e-06
Unigene36798_All	423	0	16	0	1.7364	10.7619	Up	1.86671e-05	0.000199575
Unigene36011_All	559	0	21	0	1.7246	10.752	Up	6.18982e-07	8.34614e-06
CL6042.Contig2_All	373	0	14	0	1.723	10.7507	Up	7.29182e-05	0.000694697
Unigene35508_All	427	0	16	0	1.7201	10.7483	Up	1.86671e-05	0.000199664
Unigene15514_All	428	0	16	0	1.7161	10.7449	Up	1.86671e-05	0.000199717
CL6386.Contig6_All	697	0	26	0	1.7124	10.7418	Up	2.05248e-08	3.31323e-07
Unigene3811_All	785	0	29	0	1.6959	10.7278	Up	2.65852e-09	4.71799e-08
Unigene25275_All	461	0	17	0	1.6928	10.7252	Up	9.44488e-06	0.000106496
Unigene16028_All	572	0	21	0	1.6854	10.7189	Up	6.18982e-07	8.34521e-06
CL16661.Contig2_All	437	0	16	0	1.6808	10.7149	Up	1.86671e-05	0.000199752
CL15632.Contig1_All	492	0	18	0	1.6795	10.7138	Up	4.77878e-06	5.65687e-05
CL12137.Contig2_All	603	0	22	0	1.6748	10.7098	Up	3.13184e-07	4.37914e-06
Unigene22202_All	799	0	29	0	1.6662	10.7023	Up	2.65852e-09	4.71868e-08
CL7272.Contig2_All	497	0	18	0	1.6626	10.6992	Up	4.77878e-06	5.65244e-05
CL8185.Contig13_All	558	0	20	0	1.6454	10.6842	Up	1.22337e-06	1.57625e-05
CL8105.Contig1_All	980	0	35	0	1.6395	10.679	Up	4.4603e-11	9.28523e-10
Unigene35440_All	421	0	15	0	1.6356	10.6756	Up	3.6894e-05	0.0003731
Unigene35792_All	399	0	14	0	1.6107	10.6535	Up	7.29182e-05	0.000694806
Unigene35335_All	635	0	22	0	1.5904	10.6352	Up	3.13184e-07	4.37864e-06
Unigene11594_All	523	0	18	0	1.5799	10.6256	Up	4.77878e-06	5.65466e-05
Unigene28547_All	467	0	16	0	1.5728	10.6191	Up	1.86671e-05	0.000199841
CL9856.Contig4_All	442	0	15	0	1.5579	10.6054	Up	3.6894e-05	0.000372819
CL2501.Contig3_All	444	0	15	0	1.5509	10.5989	Up	3.6894e-05	0.000373256
Unigene36132_All	652	0	22	0	1.549	10.5971	Up	3.13184e-07	4.37712e-06
Unigene2841_All	416	0	14	0	1.5449	10.5933	Up	7.29182e-05	0.000694423
Unigene29383_All	449	0	15	0	1.5336	10.5827	Up	3.6894e-05	0.000373193
CL10129.Contig2_All	421	0	14	0	1.5266	10.5761	Up	7.29182e-05	0.000694587
Unigene36585_All	421	0	14	0	1.5266	10.5761	Up	7.29182e-05	0.000694478
Unigene36098_All	433	0	14	0	1.4843	10.5356	Up	7.29182e-05	0.00069497
Unigene32696_All	655	0	21	0	1.4718	10.5234	Up	6.18982e-07	8.34149e-06
CL17814.Contig3_All	437	0	14	0	1.4707	10.5223	Up	7.29182e-05	0.000695244
CL943.Contig2_All	440	0	14	0	1.4606	10.5123	Up	7.29182e-05	0.000694751
CL5353.Contig1_All	506	0	16	0	1.4516	10.5034	Up	1.86671e-05	0.000199858
Unigene36791_All	818	0	25	0	1.403	10.4543	Up	4.05658e-08	6.32134e-07
Unigene36219_All	459	0	14	0	1.4002	10.4514	Up	7.29182e-05	0.000695135
Unigene15583_All	1157	0	34	0	1.349	10.3977	Up	8.81542e-11	1.78985e-09
CL9727.Contig1_All	1260	0	37	0	1.348	10.3966	Up	1.14184e-11	2.48126e-10
CL141.Contig1_All	548	0	16	0	1.3403	10.3883	Up	1.86671e-05	0.000199787
CL899.Contig1_All	662	0	19	0	1.3175	10.3636	Up	2.4179e-06	2.99318e-05
CL13343.Contig3_All	491	0	14	0	1.3089	10.3541	Up	7.29182e-05	0.00069404
Unigene2321_All	566	0	16	0	1.2977	10.3417	Up	1.86671e-05	0.000199681
Unigene13662_All	496	0	14	0	1.2957	10.3395	Up	7.29182e-05	0.000693931
CL17691.Contig1_All	788	0	22	0	1.2816	10.3237	Up	3.13184e-07	4.38016e-06
Unigene36323_All	525	0	14	0	1.2242	10.2576	Up	7.29182e-05	0.000693986
CL8459.Contig4_All	1026	0	27	0	1.2081	10.2385	Up	1.03849e-08	1.73499e-07
CL8148.Contig4_All	573	0	15	0	1.2017	10.2309	Up	3.6894e-05	0.000373006
CL14706.Contig3_All	544	0	14	0	1.1814	10.2063	Up	7.29182e-05	0.000695738
Unigene25805_All	633	0	16	0	1.1603	10.1803	Up	1.86671e-05	0.000199646
Unigene25709_All	556	0	14	0	1.1559	10.1748	Up	7.29182e-05	0.000695299
Unigene16786_All	557	0	14	0	1.1538	10.1722	Up	7.29182e-05	0.000695409
CL11597.Contig1_All	640	0	16	0	1.1477	10.1645	Up	1.86671e-05	0.000199628
Unigene28598_All	568	0	14	0	1.1315	10.144	Up	7.29182e-05	0.000694916
CL15798.Contig1_All	1303	0	32	0	1.1274	10.1388	Up	3.44352e-10	6.63928e-09
CL10089.Contig7_All	987	0	24	0	1.1163	10.1245	Up	8.01752e-08	1.20525e-06
CL2229.Contig5_All	664	0	16	0	1.1062	10.1114	Up	1.86671e-05	0.000199823
CL3407.Contig3_All	583	0	14	0	1.1024	10.1064	Up	7.29182e-05	0.000695573
Unigene22171_All	710	0	17	0	1.0992	10.1022	Up	9.44488e-06	0.000106397
Unigene21609_All	710	0	17	0	1.0992	10.1022	Up	9.44488e-06	0.000106387
Unigene19271_All	794	0	19	0	1.0985	10.1013	Up	2.4179e-06	2.99042e-05
CL3795.Contig2_All	1389	0	33	0	1.0906	10.0909	Up	1.7423e-10	3.44438e-09
CL8128.Contig2_All	637	0	15	0	1.081	10.0782	Up	3.6894e-05	0.00037285
Unigene12812_All	889	0	20	0	1.0328	10.0123	Up	1.22337e-06	1.57642e-05
Unigene14298_All	643	0	14	0	0.9995	9.96506	Up	7.29182e-05	0.000694314
Unigene29900_All	1023	0	22	0	0.9872	9.9472	Up	3.13184e-07	4.37813e-06
CL4376.Contig2_All	727	0	15	0	0.9472	9.88753	Up	3.6894e-05	0.000373068
CL6536.Contig1_All	1947	0	37	0	0.8724	9.76885	Up	1.14184e-11	2.48215e-10
CL17836.Contig1_All	1186	0	22	0	0.8515	9.73386	Up	3.13184e-07	4.37965e-06
Unigene6825_All	920	0	17	0	0.8483	9.72843	Up	9.44488e-06	0.000106377
CL7651.Contig1_All	1533	0	28	0	0.8385	9.71167	Up	5.25438e-09	9.05239e-08
Unigene43041_All	1016	0	18	0	0.8133	9.66764	Up	4.77878e-06	5.65632e-05
Unigene35027_All	856	0	15	0	0.8044	9.65177	Up	3.6894e-05	0.000372975
CL8509.Contig2_All	930	0	16	0	0.7898	9.62534	Up	1.86671e-05	0.000199894
Unigene35028_All	832	0	14	0	0.7725	9.59339	Up	7.29182e-05	0.000694642
Unigene24015_All	1070	0	18	0	0.7723	9.59302	Up	4.77878e-06	5.65853e-05
CL3795.Contig9_All	1213	0	20	0	0.7569	9.56396	Up	1.22337e-06	1.57608e-05
CL7651.Contig4_All	1225	0	19	0	0.712	9.47573	Up	2.4179e-06	2.99073e-05
CL4104.Contig2_All	1352	0	20	0	0.6791	9.40748	Up	1.22337e-06	1.57575e-05
CL3795.Contig8_All	1245	0	17	0	0.6268	9.29186	Up	9.44488e-06	0.000106407
Unigene35215_All	1060	0	14	0	0.6063	9.24389	Up	7.29182e-05	0.00069415
Unigene42537_All	1143	0	14	0	0.5623	9.1352	Up	7.29182e-05	0.000695025
CL6402.Contig5_All	1375	0	16	0	0.5342	9.06124	Up	1.86671e-05	0.000199699
CL10617.Contig1_All	1274	0	14	0	0.5045	8.97871	Up	7.29182e-05	0.000694259
Unigene11451_All	1538	0	14	0	0.4179	8.70701	Up	7.29182e-05	0.000695464
CL673.Contig11_All	1803	0	14	0	0.3565	8.47776	Up	7.29182e-05	0.000695519
Unigene719_All	2331	0	18	0	0.3545	8.46964	Up	4.77878e-06	5.65521e-05
CL13387.Contig2_All	2571	0	17	0	0.3035	8.24555	Up	9.44488e-06	0.000106457
CL4969.Contig1_All	1032	1	266	0.0456	11.8324	8.01949	Up	2.65902e-77	3.3144e-75
CL8738.Contig1_All	1339	2	446	0.0702	15.2906	7.76696	Up	2.72168e-128	5.81401e-126
CL4367.Contig1_All	781	1	201	0.0602	11.8145	7.61658	Up	3.4418e-58	3.37503e-56
Unigene27560_All	2126	1	187	0.0221	4.0378	7.51338	Up	4.44866e-54	4.06253e-52
CL4367.Contig2_All	815	3	412	0.1731	23.2065	7.06678	Up	1.83332e-116	3.44198e-114
Unigene35823_All	1227	1	132	0.0383	4.9385	7.01058	Up	5.93212e-38	3.86236e-36
Unigene36250_All	2093	5	651	0.1123	14.2785	6.99034	Up	7.2735e-183	2.44965e-180
CL7972.Contig3_All	1299	1	128	0.0362	4.5235	6.96531	Up	8.78352e-37	5.56311e-35
CL4753.Contig3_All	601	1	118	0.0782	9.0132	6.84873	Up	7.3788e-34	4.30369e-32
CL3162.Contig1_All	975	1	115	0.0482	5.4146	6.81168	Up	5.5555e-33	3.17891e-31
Unigene9130_All	2396	4	448	0.0785	8.5834	6.77271	Up	2.94096e-125	6.09924e-123
Unigene22078_All	570	4	447	0.3299	36	6.76982	Up	5.76138e-125	1.18873e-122
CL1131.Contig5_All	271	1	108	0.1735	18.2946	6.72034	Up	6.1564e-31	3.29216e-29
Unigene36155_All	1261	1	107	0.0373	3.8953	6.70642	Up	1.20581e-30	6.39156e-29
CL4176.Contig11_All	520	1	106	0.0904	9.3578	6.6937	Up	2.36152e-30	1.24142e-28
Unigene28052_All	1325	13	1315	0.4613	45.5595	6.6259	Up	0	0
Unigene28295_All	1076	4	402	0.1748	17.1508	6.61643	Up	7.81154e-112	1.39923e-109
Unigene35784_All	1290	1	100	0.0364	3.5586	6.61123	Up	1.3301e-28	6.61812e-27
CL17190.Contig1_All	733	1	99	0.0641	6.2001	6.59582	Up	2.60332e-28	1.28422e-26
CL17190.Contig2_All	689	2	196	0.1365	13.0589	6.57999	Up	5.00314e-55	4.65323e-53
Unigene32060_All	868	3	293	0.1625	15.4959	6.5753	Up	1.0813e-81	1.42727e-79
CL11030.Contig2_All	454	2	188	0.2071	19.0095	6.52025	Up	1.07334e-52	9.56339e-51
CL2332.Contig2_All	868	10	937	0.5416	49.5552	6.51566	Up	7.86902e-258	4.13664e-255
CL3728.Contig1_All	1161	2	182	0.081	7.1963	6.47319	Up	6.00302e-51	5.14761e-49
CL2332.Contig1_All	848	3	272	0.1663	14.7246	6.4683	Up	1.41869e-75	1.74143e-73
CL3162.Contig5_All	884	1	87	0.0532	4.5179	6.40808	Up	8.16094e-25	3.56733e-23
Unigene35275_All	2064	5	423	0.1139	9.4081	6.36806	Up	2.48348e-116	4.641e-114
CL4367.Contig3_All	781	2	161	0.1204	9.4633	6.29644	Up	7.71802e-45	5.8506e-43
CL15157.Contig2_All	592	7	559	0.5559	43.3471	6.28497	Up	1.06372e-152	2.73063e-150
CL249.Contig14_All	1160	2	159	0.0811	6.2923	6.27774	Up	2.942e-44	2.20802e-42
CL1039.Contig2_All	1036	1	77	0.0454	3.4119	6.23174	Up	6.5978e-22	2.55928e-20
Unigene19072_All	844	1	75	0.0557	4.0793	6.1945	Up	2.51284e-21	9.55717e-20
Unigene29316_All	597	1	74	0.0788	5.6902	6.17414	Up	4.9028e-21	1.84727e-19
Unigene28709_All	447	1	73	0.1052	7.497	6.15511	Up	9.56418e-21	3.55702e-19
CL1858.Contig2_All	529	1	72	0.0889	6.2481	6.13509	Up	1.86542e-20	6.84713e-19
CL13679.Contig1_All	637	5	357	0.369	25.7275	6.12355	Up	3.6264e-97	5.59261e-95
CL11412.Contig2_All	775	1	71	0.0607	4.2056	6.11447	Up	3.63772e-20	1.32081e-18
Unigene36665_All	369	1	69	0.1274	8.584	6.07421	Up	1.38259e-19	4.89362e-18
CL4928.Contig1_All	831	1	68	0.0566	3.7564	6.0524	Up	2.69464e-19	9.40813e-18
Unigene35304_All	846	1	66	0.0556	3.5813	6.00925	Up	1.02295e-18	3.46645e-17
Unigene35606_All	1210	1	64	0.0389	2.4281	5.96391	Up	3.8801e-18	1.27621e-16
CL7021.Contig2_All	839	2	127	0.1121	6.9488	5.95391	Up	5.57638e-35	3.34771e-33
Unigene12875_All	687	1	63	0.0684	4.2097	5.94358	Up	7.55432e-18	2.44415e-16
Unigene29438_All	607	1	63	0.0775	4.7645	5.94198	Up	7.55432e-18	2.44284e-16
CL4857.Contig1_All	1084	1	63	0.0434	2.668	5.94192	Up	7.55432e-18	2.44349e-16
CL7703.Contig3_All	1063	16	989	0.7077	42.7103	5.9153	Up	1.43365e-263	7.95138e-261
CL1858.Contig1_All	585	1	61	0.0804	4.7868	5.89572	Up	2.86152e-17	8.96555e-16
CL949.Contig1_All	316	1	60	0.1488	8.7163	5.87227	Up	5.56722e-17	1.7211e-15
Unigene35331_All	946	7	408	0.3479	19.7988	5.8306	Up	5.74642e-109	9.93974e-107
Unigene15873_All	663	1	58	0.0709	4.0159	5.82379	Up	2.10568e-16	6.27232e-15
Unigene35428_All	525	1	58	0.0896	5.0715	5.82277	Up	2.10568e-16	6.27078e-15
CL13166.Contig1_All	806	2	113	0.1167	6.436	5.78529	Up	6.16778e-31	3.29679e-29
CL3162.Contig7_All	1143	4	224	0.1645	8.9965	5.7732	Up	3.62034e-60	3.65382e-58
CL15607.Contig1_All	584	3	165	0.2415	12.97	5.74701	Up	1.48615e-44	1.11885e-42
Unigene18933_All	1639	2	109	0.0574	3.0529	5.73299	Up	8.7763e-30	4.53666e-28
Unigene36127_All	1789	4	215	0.1051	5.5169	5.71402	Up	1.41864e-57	1.3722e-55
CL2501.Contig1_All	939	2	107	0.1001	5.231	5.70757	Up	3.30748e-29	1.68167e-27
CL11412.Contig3_All	547	1	53	0.0859	4.4479	5.69432	Up	5.82994e-15	1.60933e-13
Unigene30542_All	486	3	159	0.2902	15.0186	5.69356	Up	7.94796e-43	5.78202e-41
CL6710.Contig1_All	1571	11	578	0.3292	16.8897	5.68104	Up	2.91112e-152	7.44139e-150
CL11030.Contig3_All	568	1	52	0.0828	4.2027	5.66554	Up	1.13167e-14	3.04876e-13
Unigene4464_All	1364	1	52	0.0345	1.7501	5.6647	Up	1.13167e-14	3.04944e-13
Unigene31395_All	764	5	253	0.3077	15.2019	5.62658	Up	3.94114e-67	4.42037e-65
Unigene21517_All	1426	1	49	0.033	1.5774	5.57894	Up	8.2606e-14	2.09474e-12
CL11903.Contig1_All	1030	2	97	0.0913	4.3232	5.56534	Up	2.48846e-26	1.15013e-24
Unigene6407_All	1612	8	385	0.2333	10.9639	5.55443	Up	6.0009e-101	9.66121e-99
CL263.Contig5_All	774	1	47	0.0607	2.7876	5.52118	Up	3.10274e-13	7.54214e-12
Unigene28297_All	653	1	47	0.072	3.3041	5.52012	Up	3.10274e-13	7.54062e-12
Unigene35406_All	1751	3	141	0.0806	3.6966	5.51928	Up	1.18489e-37	7.64473e-36
CL3162.Contig9_All	1153	9	411	0.367	16.3637	5.47858	Up	4.71642e-107	8.00917e-105
CL4406.Contig6_All	1170	2	91	0.0804	3.5705	5.47279	Up	1.31149e-24	5.69575e-23
Unigene37626_All	782	1	45	0.0601	2.6416	5.4579	Up	1.16355e-12	2.71693e-11
CL6685.Contig1_All	827	2	90	0.1137	4.9958	5.45741	Up	2.53752e-24	1.08951e-22
CL11412.Contig1_All	1645	5	224	0.1429	6.251	5.45101	Up	8.26538e-59	8.20485e-57
Unigene13587_All	1650	11	485	0.3134	13.4936	5.42813	Up	1.43013e-125	2.97615e-123
Unigene2901_All	604	1	44	0.0778	3.3441	5.4257	Up	2.25178e-12	5.15934e-11
Unigene23138_All	567	1	44	0.0829	3.5624	5.42533	Up	2.25178e-12	5.15836e-11
CL1610.Contig2_All	1122	1	44	0.0419	1.8002	5.42506	Up	2.25178e-12	5.15738e-11
CL12420.Contig1_All	1403	16	691	0.5362	22.6094	5.39801	Up	7.38918e-178	2.3952e-175
Unigene19385_All	723	3	129	0.1951	8.1907	5.3917	Up	3.2488e-34	1.91053e-32
CL13756.Contig1_All	1145	1	43	0.0411	1.724	5.39048	Up	4.35582e-12	9.76007e-11
CL779.Contig1_All	653	2	85	0.144	5.9755	5.37492	Up	6.85636e-23	2.75778e-21
Unigene7606_All	435	2	85	0.2162	8.9701	5.37469	Up	6.85636e-23	2.7587e-21
Unigene9727_All	1111	2	84	0.0846	3.4708	5.35847	Up	1.32467e-22	5.27894e-21
CL3162.Contig8_All	1169	9	371	0.362	14.569	5.33077	Up	1.30523e-95	1.97512e-93
CL6536.Contig2_All	2247	1	41	0.0209	0.8376	5.32469	Up	1.62755e-11	3.50087e-10
CL13791.Contig2_All	786	1	41	0.0598	2.3946	5.3235	Up	1.62755e-11	3.50025e-10
CL8629.Contig5_All	1601	1	41	0.0294	1.1756	5.32144	Up	1.62755e-11	3.5015e-10
Unigene16598_All	1528	3	122	0.0923	3.6653	5.31146	Up	3.25436e-32	1.80826e-30
CL14245.Contig3_All	512	4	162	0.3673	14.5249	5.30543	Up	2.25704e-42	1.63019e-40
CL13166.Contig2_All	791	5	202	0.2972	11.7232	5.30179	Up	1.61192e-52	1.43094e-50
Unigene35002_All	560	2	80	0.1679	6.558	5.28758	Up	1.84079e-21	7.02102e-20
CL3683.Contig1_All	1018	3	118	0.1385	5.3211	5.26377	Up	4.50784e-31	2.41807e-29
Unigene35413_All	1845	4	156	0.1019	3.8815	5.25139	Up	1.16167e-40	8.03978e-39
Unigene26478_All	793	1	39	0.0593	2.2577	5.25068	Up	6.06878e-11	1.24981e-09
CL7064.Contig5_All	788	1	39	0.0597	2.272	5.25009	Up	6.06878e-11	1.25002e-09
CL4613.Contig2_All	824	1	39	0.0571	2.1727	5.24985	Up	6.06878e-11	1.25024e-09
CL7497.Contig2_All	1245	25	973	0.9441	35.8767	5.24796	Up	1.37014e-246	6.65307e-244
Unigene35638_All	980	2	77	0.0959	3.6069	5.23308	Up	1.32093e-20	4.88114e-19
CL8738.Contig2_All	1627	8	307	0.2312	8.662	5.22749	Up	1.21615e-78	1.54294e-76
Unigene12813_All	1359	13	498	0.4497	16.8221	5.22525	Up	1.11473e-126	2.35218e-124
CL8365.Contig1_All	549	3	114	0.2569	9.5324	5.21356	Up	6.22406e-30	3.23394e-28
Unigene2351_All	736	1	37	0.0639	2.3078	5.17456	Up	2.2578e-10	4.42083e-09
Unigene36553_All	514	1	37	0.0915	3.3045	5.17452	Up	2.2578e-10	4.42154e-09
CL9462.Contig2_All	1207	4	147	0.1558	5.5909	5.16531	Up	4.2441e-38	2.78128e-36
CL2649.Contig4_All	577	1	36	0.0815	2.8642	5.13519	Up	4.35086e-10	8.30655e-09
CL1269.Contig2_All	603	1	36	0.078	2.7407	5.13493	Up	4.35086e-10	8.30786e-09
CL11597.Contig2_All	750	7	248	0.4388	15.1796	5.11243	Up	4.12296e-63	4.3537e-61
Unigene35238_All	1678	14	496	0.3923	13.5694	5.11226	Up	7.47452e-125	1.53957e-122
CL6625.Contig2_All	1320	1	35	0.0356	1.2172	5.09555	Up	8.37878e-10	1.55856e-08
Unigene35458_All	516	1	35	0.0911	3.1138	5.09508	Up	8.37878e-10	1.5588e-08
Unigene36685_All	906	1	35	0.0519	1.7734	5.09464	Up	8.37878e-10	1.55904e-08
Unigene28903_All	950	4	140	0.198	6.7651	5.09454	Up	4.13806e-36	2.57766e-34
CL263.Contig3_All	655	1	34	0.0718	2.3829	5.05259	Up	1.61245e-09	2.91897e-08
Unigene35306_All	669	1	34	0.0703	2.333	5.05252	Up	1.61245e-09	2.91853e-08
CL3162.Contig4_All	999	2	67	0.0941	3.0788	5.03203	Up	9.21588e-18	2.96428e-16
Unigene35087_All	281	1	33	0.1673	5.3911	5.01007	Up	3.1008e-09	5.45961e-08
Unigene5819_All	719	1	33	0.0654	2.107	5.00976	Up	3.1008e-09	5.46041e-08
CL6710.Contig2_All	1513	11	362	0.3418	10.9835	5.00604	Up	1.50535e-90	2.16162e-88
Unigene579_All	2028	3	98	0.0695	2.2183	4.9963	Up	2.17972e-25	9.7393e-24
CL9886.Contig1_All	1072	12	390	0.5263	16.7009	4.9879	Up	2.90068e-97	4.47912e-95
CL17205.Contig1_All	690	5	162	0.3407	10.7779	4.98343	Up	3.77058e-41	2.64286e-39
Unigene22237_All	542	1	32	0.0867	2.7103	4.96628	Up	5.95838e-09	1.01955e-07
Unigene36079_All	247	1	32	0.1903	5.9473	4.96589	Up	5.95838e-09	1.01941e-07
CL6976.Contig2_All	1421	5	160	0.1654	5.1689	4.96583	Up	1.3868e-40	9.5924e-39
CL5225.Contig4_All	738	1	32	0.0637	1.9905	4.96569	Up	5.95838e-09	1.01926e-07
Unigene35712_All	406	3	96	0.3474	10.8546	4.96556	Up	8.02368e-25	3.50987e-23
Unigene31423_All	874	2	64	0.1076	3.3615	4.96536	Up	6.52278e-17	2.00523e-15
CL4303.Contig6_All	1066	4	126	0.1764	5.426	4.94297	Up	3.82086e-32	2.11817e-30
Unigene10142_All	928	5	156	0.2533	7.717	4.92912	Up	1.87182e-39	1.26293e-37
CL4340.Contig3_All	803	1	31	0.0585	1.7722	4.92096	Up	1.144e-08	1.89895e-07
Unigene2846_All	806	1	31	0.0583	1.7656	4.92052	Up	1.144e-08	1.89921e-07
Unigene11673_All	1261	1	31	0.0373	1.1285	4.91909	Up	1.144e-08	1.89947e-07
Unigene15388_All	1107	1	31	0.0425	1.2855	4.91872	Up	1.144e-08	1.89973e-07
CL12387.Contig2_All	408	3	91	0.3457	10.2388	4.88838	Up	2.07484e-23	8.53281e-22
CL14249.Contig2_All	1918	5	151	0.1226	3.6141	4.88161	Up	4.82152e-38	3.14943e-36
Unigene19301_All	592	2	60	0.1588	4.6526	4.87275	Up	8.80912e-16	2.5432e-14
CL8228.Contig1_All	899	4	120	0.2092	6.1276	4.87237	Up	1.88675e-30	9.95737e-29
CL15478.Contig1_All	421	1	30	0.1117	3.2712	4.87212	Up	2.19458e-08	3.52567e-07
Unigene36710_All	467	1	30	0.1007	2.949	4.87209	Up	2.19458e-08	3.52614e-07
CL14005.Contig3_All	502	1	30	0.0937	2.7434	4.87177	Up	2.19458e-08	3.52521e-07
Unigene31099_All	698	16	477	1.0777	31.3713	4.86342	Up	4.5517e-117	8.61247e-115
CL9463.Contig1_All	1683	3	88	0.0838	2.4003	4.84012	Up	1.45493e-22	5.78851e-21
CL3722.Contig2_All	741	1	29	0.0634	1.7966	4.82464	Up	4.20608e-08	6.53662e-07
CL8666.Contig1_All	957	1	29	0.0491	1.3911	4.82436	Up	4.20608e-08	6.53578e-07
Unigene12323_All	739	1	29	0.0636	1.8015	4.82403	Up	4.20608e-08	6.53746e-07
Unigene12830_All	1037	2	58	0.0907	2.5675	4.82312	Up	3.22788e-15	9.03e-14
Unigene32002_All	618	1	29	0.0761	2.1542	4.82311	Up	4.20608e-08	6.5383e-07
CL9073.Contig1_All	548	3	86	0.2574	7.2042	4.80675	Up	5.32092e-22	2.07463e-20
Unigene35567_All	1335	5	143	0.1761	4.9173	4.8034	Up	8.62892e-36	5.32027e-34
CL4176.Contig10_All	288	1	28	0.1632	4.4631	4.77333	Up	8.0534e-08	1.20974e-06
Unigene35348_All	468	1	28	0.1005	2.7465	4.77233	Up	8.0534e-08	1.20989e-06
CL8924.Contig2_All	833	8	222	0.4515	12.2343	4.76006	Up	1.36834e-54	1.25908e-52
Unigene15571_All	785	4	111	0.2396	6.4912	4.75979	Up	6.43212e-28	3.1346e-26
Unigene18785_All	622	15	415	1.1338	30.6286	4.75564	Up	8.53856e-101	1.36739e-98
CL3722.Contig3_All	350	1	27	0.1343	3.5413	4.72075	Up	1.54038e-07	2.24121e-06
Unigene36485_All	435	1	27	0.1081	2.8493	4.72017	Up	1.54038e-07	2.24148e-06
Unigene7028_All	850	8	215	0.4425	11.6115	4.71373	Up	1.25686e-52	1.11903e-50
CL5437.Contig5_All	1260	2	53	0.0746	1.931	4.69403	Up	8.21736e-14	2.08465e-12
CL15820.Contig3_All	556	2	53	0.1691	4.3759	4.69363	Up	8.21736e-14	2.08421e-12
CL17567.Contig4_All	368	2	53	0.2555	6.6115	4.69358	Up	8.21736e-14	2.08553e-12
Unigene36773_All	993	2	53	0.0947	2.4502	4.69339	Up	8.21736e-14	2.08509e-12
Unigene19402_All	1584	4	105	0.1187	3.043	4.6801	Up	3.09754e-26	1.42728e-24
CL1583.Contig1_All	2531	22	577	0.4087	10.4653	4.67843	Up	2.89608e-138	6.6318e-136
CL1583.Contig2_All	486	1	26	0.0967	2.4559	4.66659	Up	2.94304e-07	4.12804e-06
CL8588.Contig1_All	385	1	26	0.1221	3.1001	4.66618	Up	2.94304e-07	4.129e-06
CL1066.Contig1_All	234	1	26	0.2009	5.1007	4.66615	Up	2.94304e-07	4.12852e-06
Unigene7843_All	767	1	26	0.0613	1.5561	4.6659	Up	2.94304e-07	4.12756e-06
CL7329.Contig2_All	534	2	52	0.1761	4.4702	4.66587	Up	1.56717e-13	3.89724e-12
Unigene36772_All	704	2	52	0.1336	3.3908	4.66563	Up	1.56717e-13	3.89643e-12
CL4176.Contig3_All	592	3	77	0.2382	5.9709	4.6477	Up	1.7854e-19	6.28258e-18
CL779.Contig2_All	1288	6	154	0.219	5.4888	4.64749	Up	9.16764e-38	5.92432e-36
Unigene21802_All	543	37	938	3.2036	79.2999	4.62955	Up	2.1269e-222	9.15157e-220
CL14300.Contig1_All	1260	7	177	0.2612	6.4487	4.62578	Up	4.2295e-43	3.09928e-41
CL16852.Contig2_All	1449	1	25	0.0324	0.792	4.61143	Up	5.6163e-07	7.61871e-06
CL7570.Contig1_All	680	1	25	0.0691	1.6877	4.61023	Up	5.6163e-07	7.61786e-06
CL946.Contig3_All	431	1	25	0.1091	2.6628	4.60922	Up	5.6163e-07	7.61956e-06
Unigene29718_All	1899	1	25	0.0248	0.6043	4.60685	Up	5.6163e-07	7.617e-06
Unigene35368_All	622	3	74	0.2268	5.4615	4.5898	Up	1.23097e-18	4.15504e-17
Unigene21419_All	1229	8	197	0.306	7.3584	4.58779	Up	1.35127e-47	1.08342e-45
Unigene35344_All	939	5	123	0.2503	6.0132	4.5864	Up	3.45506e-30	1.80998e-28
Unigene34999_All	709	4	98	0.2652	6.3453	4.58054	Up	2.80216e-24	1.20058e-22
CL5948.Contig3_All	416	2	49	0.226	5.4072	4.58049	Up	1.08278e-12	2.53714e-11
CL12295.Contig1_All	936	7	171	0.3516	8.3867	4.5761	Up	1.99648e-41	1.40752e-39
Unigene20661_All	864	9	218	0.4897	11.5828	4.56394	Up	2.2799e-52	2.01947e-50
Unigene6821_All	1037	1	24	0.0453	1.0624	4.55167	Up	1.07041e-06	1.39357e-05
CL10763.Contig1_All	694	1	24	0.0677	1.5875	4.55146	Up	1.07041e-06	1.39342e-05
CL7891.Contig1_All	1026	1	24	0.0458	1.0738	4.55123	Up	1.07041e-06	1.39327e-05
CL15429.Contig1_All	881	2	48	0.1067	2.5011	4.55093	Up	2.05936e-12	4.73101e-11
CL4176.Contig2_All	663	2	48	0.1418	3.3235	4.55077	Up	2.05936e-12	4.73011e-11
CL8365.Contig2_All	527	4	96	0.3568	8.3624	4.55073	Up	1.01169e-23	4.23257e-22
CL6076.Contig3_All	1387	1	24	0.0339	0.7943	4.55033	Up	1.07041e-06	1.39372e-05
Unigene39029_All	366	1	24	0.1285	3.0102	4.55002	Up	1.07041e-06	1.39387e-05
CL9462.Contig4_All	1276	7	166	0.2579	5.9721	4.53335	Up	4.92704e-40	3.36754e-38
Unigene35429_All	434	2	47	0.2167	4.9714	4.51988	Up	3.91384e-12	8.80563e-11
CL5715.Contig3_All	1023	28	655	1.2868	29.3924	4.51358	Up	2.00776e-153	5.18706e-151
CL13880.Contig7_All	660	3	70	0.2137	4.8688	4.50991	Up	1.60413e-17	5.09329e-16
Unigene21830_All	1532	3	70	0.0921	2.0975	4.50933	Up	1.60413e-17	5.09195e-16
Unigene28294_All	914	16	373	0.823	18.7341	4.50863	Up	5.78766e-88	8.17493e-86
CL14479.Contig1_All	1401	7	163	0.2349	5.341	4.50699	Up	3.36324e-39	2.25787e-37
Unigene30318_All	2169	94	2187	2.0375	46.287	4.50574	Up	0	0
Unigene28255_All	946	4	93	0.1988	4.513	4.5047	Up	6.91958e-23	2.78136e-21
CL7408.Contig1_All	1100	1	23	0.0427	0.9599	4.49058	Up	2.0373e-06	2.55128e-05
CL6815.Contig2_All	787	1	23	0.0597	1.3416	4.49008	Up	2.0373e-06	2.55101e-05
Unigene31663_All	867	1	23	0.0542	1.2178	4.48984	Up	2.0373e-06	2.55075e-05
CL3141.Contig3_All	463	1	23	0.1015	2.2804	4.48974	Up	2.0373e-06	2.55154e-05
CL16961.Contig2_All	353	3	69	0.3996	8.9731	4.48898	Up	3.04376e-17	9.51681e-16
CL5402.Contig1_All	964	109	2441	5.316	116.241	4.45064	Up	0	0
CL5402.Contig2_All	953	77	1724	3.7987	83.0451	4.45032	Up	0	0
CL9462.Contig3_All	1096	4	89	0.1716	3.7278	4.4412	Up	8.93072e-22	3.44432e-20
Unigene25374_All	2479	12	267	0.2276	4.9443	4.44119	Up	8.55794e-63	8.98978e-61
Unigene23351_All	1319	8	178	0.2852	6.195	4.44106	Up	2.58252e-42	1.86305e-40
CL2776.Contig8_All	830	1	22	0.0566	1.2168	4.42615	Up	3.87182e-06	4.64327e-05
CL15272.Contig2_All	870	1	22	0.054	1.1608	4.42602	Up	3.87182e-06	4.64419e-05
Unigene19830_All	678	1	22	0.0693	1.4896	4.42593	Up	3.87182e-06	4.64511e-05
Unigene34981_All	589	1	22	0.0798	1.7147	4.42542	Up	3.87182e-06	4.64234e-05
Unigene35951_All	790	2	44	0.119	2.5568	4.42531	Up	2.6737e-11	5.65952e-10
CL10826.Contig1_All	441	1	22	0.1066	2.2901	4.42513	Up	3.87182e-06	4.64188e-05
CL4857.Contig3_All	805	1	22	0.0584	1.2546	4.42512	Up	3.87182e-06	4.64465e-05
Unigene36110_All	424	1	22	0.1109	2.3819	4.42478	Up	3.87182e-06	4.64557e-05
CL4613.Contig3_All	950	1	22	0.0495	1.0631	4.4247	Up	3.87182e-06	4.64373e-05
CL14961.Contig3_All	734	1	22	0.0641	1.3759	4.42391	Up	3.87182e-06	4.6428e-05
Unigene25516_All	1498	10	219	0.3138	6.7112	4.41865	Up	1.37071e-51	1.1992e-49
CL6040.Contig1_All	1915	7	151	0.1719	3.6197	4.39623	Up	7.13696e-36	4.40938e-34
CL15805.Contig1_All	750	2	43	0.1254	2.6319	4.3915	Up	5.06448e-11	1.04978e-09
CL12910.Contig1_All	849	2	43	0.1108	2.325	4.3912	Up	5.06448e-11	1.0496e-09
CL8027.Contig2_All	842	68	1456	3.7969	79.3814	4.38591	Up	0	0
CL4176.Contig4_All	649	8	171	0.5795	12.0954	4.38351	Up	2.23294e-40	1.53747e-38
CL3162.Contig10_All	1024	23	490	1.056	21.9667	4.37864	Up	5.30306e-113	9.67093e-111
CL6536.Contig3_All	1896	7	149	0.1736	3.6076	4.3772	Up	2.5487e-35	1.54853e-33
CL4176.Contig6_All	404	5	106	0.5819	12.0446	4.37147	Up	1.81627e-25	8.13641e-24
CL14245.Contig1_All	715	19	402	1.2493	25.8101	4.36874	Up	7.61292e-93	1.11571e-90
CL2426.Contig1_All	1845	80	1692	2.0386	42.0992	4.36814	Up	0	0
Unigene15783_All	1078	1	21	0.0436	0.8943	4.35836	Up	7.34656e-06	8.44271e-05
CL14904.Contig6_All	763	1	21	0.0616	1.2635	4.35835	Up	7.34656e-06	8.44111e-05
CL684.Contig1_All	432	1	21	0.1088	2.2315	4.35826	Up	7.34656e-06	8.4387e-05
Unigene25371_All	716	2	42	0.1313	2.6928	4.35817	Up	9.58424e-11	1.93943e-09
Unigene16657_All	698	2	42	0.1347	2.7623	4.35805	Up	9.58424e-11	1.93911e-09
CL4106.Contig5_All	300	1	21	0.1567	3.2134	4.35802	Up	7.34656e-06	8.44191e-05
Unigene736_All	2430	14	294	0.2709	5.5541	4.35772	Up	3.4661e-68	3.95358e-66
CL3795.Contig5_All	1371	1	21	0.0343	0.7032	4.35765	Up	7.34656e-06	8.44512e-05
Unigene36805_All	477	1	21	0.0986	2.021	4.35734	Up	7.34656e-06	8.4395e-05
Unigene11530_All	468	1	21	0.1005	2.0599	4.35731	Up	7.34656e-06	8.4379e-05
CL9383.Contig6_All	840	1	21	0.056	1.1477	4.35717	Up	7.34656e-06	8.44352e-05
CL17435.Contig1_All	648	1	21	0.0726	1.4877	4.35697	Up	7.34656e-06	8.44031e-05
CL3090.Contig3_All	658	1	21	0.0715	1.4651	4.35691	Up	7.34656e-06	8.44432e-05
Unigene6881_All	1168	1	21	0.0403	0.8254	4.35624	Up	7.34656e-06	8.44592e-05
CL3795.Contig3_All	1405	8	167	0.2677	5.4564	4.34926	Up	2.83948e-39	1.90943e-37
Unigene18422_All	809	63	1315	3.6612	74.6185	4.34914	Up	3.33218e-299	2.07674e-296
Unigene21952_All	704	18	375	1.2021	24.4528	4.34637	Up	2e-86	2.77949e-84
Unigene22732_All	397	4	83	0.4737	9.5975	4.34061	Up	4.0837e-20	1.48096e-18
CL15797.Contig1_All	875	17	350	0.9134	18.3624	4.32936	Up	1.47406e-80	1.92054e-78
Unigene35337_All	940	3	61	0.15	2.979	4.31179	Up	5.00478e-15	1.38661e-13
CL11121.Contig2_All	1268	6	122	0.2225	4.4168	4.31112	Up	7.03444e-29	3.53353e-27
Unigene15745_All	1071	4	81	0.1756	3.4719	4.30536	Up	1.4544e-19	5.14177e-18
CL14665.Contig3_All	292	7	141	1.1271	22.1669	4.29772	Up	4.09584e-33	2.3459e-31
CL14005.Contig2_All	1449	11	221	0.3569	7.0015	4.29407	Up	4.02862e-51	3.46932e-49
Unigene23792_All	1597	1	20	0.0294	0.5749	4.28942	Up	1.39155e-05	0.000152373
Unigene31310_All	830	1	20	0.0566	1.1062	4.28867	Up	1.39155e-05	0.00015229
Unigene16285_All	608	1	20	0.0773	1.5101	4.28803	Up	1.39155e-05	0.000152345
CL10683.Contig1_All	318	1	20	0.1478	2.8872	4.28795	Up	1.39155e-05	0.000152386
Unigene7342_All	276	1	20	0.1703	3.3265	4.28785	Up	1.39155e-05	0.000152317
CL7994.Contig1_All	227	1	20	0.2071	4.0446	4.2876	Up	1.39155e-05	0.000152304
CL27.Contig2_All	874	1	20	0.0538	1.0505	4.28733	Up	1.39155e-05	0.000152276
CL5225.Contig3_All	729	1	20	0.0645	1.2594	4.28729	Up	1.39155e-05	0.000152359
CL16892.Contig2_All	255	1	20	0.1844	3.6005	4.28729	Up	1.39155e-05	0.000152248
CL3150.Contig4_All	761	1	20	0.0618	1.2065	4.28708	Up	1.39155e-05	0.000152331
Unigene35414_All	514	1	20	0.0915	1.7862	4.28698	Up	1.39155e-05	0.0001524
Unigene14996_All	755	1	20	0.0623	1.2161	4.28689	Up	1.39155e-05	0.000152414
CL7338.Contig3_All	1692	1	20	0.0278	0.5426	4.28673	Up	1.39155e-05	0.000152262
CL2919.Contig4_All	1908	8	159	0.1971	3.8255	4.27865	Up	4.53258e-37	2.8889e-35
CL249.Contig6_All	1196	35	695	1.3758	26.6761	4.27721	Up	3.44284e-157	9.16887e-155
CL7231.Contig2_All	1482	5	99	0.1586	3.0666	4.27318	Up	1.54526e-23	6.41603e-22
CL3795.Contig1_All	1376	26	512	0.8884	17.0813	4.26506	Up	5.31048e-116	9.89337e-114
CL9639.Contig1_All	625	2	39	0.1504	2.8645	4.25141	Up	6.45714e-10	1.21589e-08
CL4106.Contig4_All	535	4	78	0.3515	6.6928	4.25101	Up	9.73504e-19	3.30074e-17
Unigene6519_All	992	2	39	0.0948	1.8048	4.25081	Up	6.45714e-10	1.21607e-08
CL3795.Contig4_All	1406	3	58	0.1003	1.8937	4.23881	Up	3.3538e-14	8.74113e-13
Unigene35197_All	906	3	58	0.1557	2.9388	4.23839	Up	3.3538e-14	8.74302e-13
Unigene36454_All	1696	6	115	0.1663	3.1127	4.22631	Up	5.90682e-27	2.78759e-25
CL13734.Contig1_All	889	6	115	0.3173	5.9383	4.22613	Up	5.90682e-27	2.78651e-25
CL8185.Contig11_All	1634	20	383	0.5755	10.7601	4.22473	Up	1.30609e-86	1.82141e-84
CL4109.Contig1_All	1566	1	19	0.03	0.557	4.21464	Up	2.63084e-05	0.000273625
CL13055.Contig1_All	1095	1	19	0.0429	0.7965	4.21462	Up	2.63084e-05	0.000273885
CL5531.Contig2_All	676	1	19	0.0695	1.2903	4.21455	Up	2.63084e-05	0.000273861
Unigene10823_All	936	1	19	0.0502	0.9319	4.21442	Up	2.63084e-05	0.000273555
CL6402.Contig4_All	1358	1	19	0.0346	0.6423	4.2144	Up	2.63084e-05	0.00027379
Unigene25075_All	642	1	19	0.0732	1.3586	4.21413	Up	2.63084e-05	0.000273814
CL6136.Contig7_All	501	1	19	0.0938	1.7409	4.2141	Up	2.63084e-05	0.000273767
Unigene6135_All	853	1	19	0.0551	1.0225	4.2139	Up	2.63084e-05	0.00027372
Unigene35389_All	284	1	19	0.1655	3.0712	4.2139	Up	2.63084e-05	0.000273673
CL13935.Contig2_All	565	1	19	0.0832	1.5437	4.21367	Up	2.63084e-05	0.000273837
Unigene15541_All	602	1	19	0.0781	1.4489	4.21349	Up	2.63084e-05	0.000273602
CL3405.Contig2_All	665	1	19	0.0707	1.3116	4.21347	Up	2.63084e-05	0.000273696
CL3823.Contig3_All	911	10	190	0.5161	9.5742	4.21343	Up	1.32637e-43	9.79649e-42
Unigene32271_All	899	3	57	0.1569	2.9106	4.2134	Up	6.31336e-14	1.61553e-12
CL116.Contig6_All	233	1	19	0.2018	3.7434	4.21335	Up	2.63084e-05	0.000273531
CL8117.Contig1_All	532	1	19	0.0884	1.6395	4.21307	Up	2.63084e-05	0.000273578
Unigene6759_All	585	1	19	0.0804	1.491	4.21294	Up	2.63084e-05	0.000273649
Unigene25728_All	628	1	19	0.0749	1.3889	4.21283	Up	2.63084e-05	0.000273743
CL7703.Contig4_All	1153	11	208	0.4485	8.2814	4.20669	Up	1.48762e-47	1.19195e-45
CL8185.Contig10_All	1974	26	490	0.6192	11.3951	4.20186	Up	5.66856e-110	9.94738e-108
CL7703.Contig1_All	1247	26	490	0.9803	18.0384	4.2017	Up	5.66856e-110	9.96184e-108
Unigene15293_All	875	30	563	1.6119	29.5372	4.1957	Up	5.35036e-126	1.11727e-123
CL11098.Contig3_All	1638	46	861	1.3203	24.1301	4.1919	Up	1.04199e-191	3.76076e-189
CL2367.Contig3_All	397	29	542	3.4343	62.6727	4.18975	Up	3.06296e-121	6.08106e-119
CL8185.Contig7_All	1609	29	532	0.8474	15.1784	4.16283	Up	1.65043e-118	3.20306e-116
CL12119.Contig2_All	646	3	55	0.2183	3.9084	4.16219	Up	2.23176e-13	5.49008e-12
Unigene36572_All	1037	3	55	0.136	2.4347	4.16207	Up	2.23176e-13	5.4912e-12
Unigene35419_All	544	3	55	0.2593	4.6412	4.1618	Up	2.23176e-13	5.48897e-12
CL9498.Contig1_All	745	20	366	1.2621	22.5525	4.15939	Up	5.81248e-82	7.70587e-80
Unigene35098_All	686	8	145	0.5483	9.7032	4.14542	Up	3.10276e-33	1.78049e-31
CL12804.Contig3_All	2097	1	18	0.0224	0.394	4.13662	Up	4.96356e-05	0.000489825
CL6568.Contig1_All	696	1	18	0.0675	1.1872	4.13653	Up	4.96356e-05	0.000489905
CL8185.Contig8_All	676	1	18	0.0695	1.2223	4.13644	Up	4.96356e-05	0.000489346
Unigene6619_All	687	1	18	0.0684	1.2028	4.13626	Up	4.96356e-05	0.000489266
CL2367.Contig5_All	481	1	18	0.0977	1.7179	4.13614	Up	4.96356e-05	0.000489466
Unigene7368_All	425	1	18	0.1106	1.9443	4.13583	Up	4.96356e-05	0.000489426
CL1598.Contig5_All	314	1	18	0.1497	2.6316	4.13579	Up	4.96356e-05	0.000489706
CL6467.Contig6_All	499	1	18	0.0942	1.6559	4.13574	Up	4.96356e-05	0.000489626
Unigene15891_All	371	1	18	0.1267	2.2272	4.13574	Up	4.96356e-05	0.000489785
Unigene2922_All	385	1	18	0.1221	2.1463	4.13572	Up	4.96356e-05	0.000489306
Unigene35402_All	337	1	18	0.1395	2.452	4.13562	Up	4.96356e-05	0.000489745
Unigene35717_All	357	1	18	0.1317	2.3146	4.13544	Up	4.96356e-05	0.000489506
Unigene20234_All	447	1	18	0.1052	1.8486	4.13523	Up	4.96356e-05	0.000489666
Unigene12836_All	457	1	18	0.1029	1.8081	4.13516	Up	4.96356e-05	0.000489865
Unigene3006_All	761	1	18	0.0618	1.0858	4.13501	Up	4.96356e-05	0.000489386
Unigene25631_All	509	1	18	0.0924	1.6234	4.13498	Up	4.96356e-05	0.000489945
Unigene16115_All	1036	1	18	0.0454	0.7976	4.1349	Up	4.96356e-05	0.000489586
Unigene10889_All	556	1	18	0.0846	1.4862	4.13483	Up	4.96356e-05	0.000489546
CL15805.Contig2_All	763	8	142	0.4929	8.5434	4.11544	Up	2.04146e-32	1.14432e-30
Unigene22522_All	915	3	53	0.1541	2.659	4.10895	Up	7.86214e-13	1.86209e-11
Unigene21089_All	1982	24	422	0.5693	9.7741	4.1017	Up	2.29984e-93	3.38284e-91
CL10512.Contig1_All	414	2	35	0.2271	3.8809	4.09499	Up	8.08814e-09	1.36448e-07
Unigene632_All	1365	4	70	0.1378	2.3542	4.09459	Up	1.50796e-16	4.52979e-15
CL10405.Contig3_All	819	49	853	2.8128	47.8117	4.08728	Up	1.28469e-186	4.46349e-184
CL9380.Contig1_All	2115	10	174	0.2223	3.7767	4.08655	Up	3.0903e-39	2.07579e-37
Unigene30706_All	1266	43	747	1.5969	27.0867	4.08424	Up	1.5013e-163	4.21157e-161
CL10683.Contig2_All	924	151	2616	7.6831	129.968	4.08032	Up	0	0
CL10683.Contig3_All	921	120	2070	6.1257	103.176	4.07409	Up	0	0
CL8027.Contig1_All	692	12	206	0.8153	13.6657	4.06708	Up	4.75446e-46	3.70633e-44
Unigene31399_All	1908	22	376	0.5421	9.0465	4.06073	Up	9.08354e-83	1.21356e-80
Unigene15626_All	291	12	205	1.9387	32.3393	4.06013	Up	8.88458e-46	6.85524e-44
CL13083.Contig1_All	521	1	17	0.0902	1.4979	4.05367	Up	9.34348e-05	0.000867666
CL3162.Contig6_All	752	2	34	0.125	2.0755	4.05346	Up	1.51675e-08	2.48357e-07
Unigene7030_All	380	1	17	0.1237	2.0537	4.05331	Up	9.34348e-05	0.0008678
CL7252.Contig3_All	290	1	17	0.1621	2.691	4.05319	Up	9.34348e-05	0.000868333
Unigene35425_All	465	1	17	0.1011	1.6783	4.05315	Up	9.34348e-05	0.0008682
Unigene31757_All	730	2	34	0.1288	2.1381	4.05312	Up	1.51675e-08	2.48323e-07
Unigene35388_All	602	5	85	0.3905	6.4817	4.05298	Up	1.04152e-19	3.70812e-18
Unigene36020_All	357	1	17	0.1317	2.186	4.05297	Up	9.34348e-05	0.0008674
CL3162.Contig2_All	725	2	34	0.1297	2.1528	4.05296	Up	1.51675e-08	2.48391e-07
Unigene10140_All	402	5	85	0.5848	9.7065	4.05294	Up	1.04152e-19	3.70703e-18
Unigene35291_All	444	1	17	0.1059	1.7577	4.05291	Up	9.34348e-05	0.000867733
CL3336.Contig2_All	1730	5	85	0.1359	2.2555	4.05283	Up	1.04152e-19	3.70922e-18
Unigene7676_All	431	1	17	0.1091	1.8107	4.05282	Up	9.34348e-05	0.0008676
CL10524.Contig1_All	437	1	17	0.1076	1.7858	4.05282	Up	9.34348e-05	0.000868
Unigene1872_All	590	1	17	0.0797	1.3227	4.05276	Up	9.34348e-05	0.000867466
Unigene2521_All	285	1	17	0.165	2.7383	4.05274	Up	9.34348e-05	0.000867933
CL10124.Contig1_All	382	1	17	0.1231	2.0429	4.05272	Up	9.34348e-05	0.000867333
CL15429.Contig4_All	633	1	17	0.0743	1.2329	4.05255	Up	9.34348e-05	0.000868066
Unigene5227_All	780	1	17	0.0603	1.0005	4.05242	Up	9.34348e-05	0.000868133
Unigene32504_All	560	1	17	0.084	1.3936	4.05228	Up	9.34348e-05	0.000867533
Unigene14544_All	1289	1	17	0.0365	0.6054	4.05192	Up	9.34348e-05	0.000867866
Unigene9121_All	1168	1	17	0.0403	0.6682	4.05143	Up	9.34348e-05	0.000868266
CL11098.Contig4_All	1576	30	504	0.8949	14.6806	4.03604	Up	6.14978e-110	1.07762e-107
Unigene9397_All	695	25	419	1.6912	27.6757	4.0325	Up	1.32665e-91	1.92098e-89
Unigene10459_All	605	4	67	0.3108	5.0838	4.03185	Up	9.87916e-16	2.84465e-14
CL8738.Contig3_All	1283	12	200	0.4397	7.156	4.02456	Up	2.01642e-44	1.51712e-42
CL3795.Contig6_All	1362	3	50	0.1036	1.6852	4.02382	Up	5.16236e-12	1.15118e-10
Unigene6236_All	1801	273	4543	7.1266	115.797	4.02224	Up	0	0
Unigene36588_All	1145	5	83	0.2053	3.3277	4.01872	Up	3.63648e-19	1.26308e-17
CL4953.Contig4_All	1045	18	297	0.8098	13.047	4.01001	Up	4.14792e-65	4.50599e-63
CL1862.Contig9_All	995	2	33	0.0945	1.5225	4.00998	Up	2.84028e-08	4.51146e-07
CL8334.Contig2_All	564	12	198	1.0003	16.1159	4.00998	Up	7.01666e-44	5.21112e-42
Unigene31576_All	1913	8	131	0.1966	3.1436	3.99908	Up	1.98338e-29	1.01484e-27
Unigene6842_All	357	3	49	0.3951	6.3008	3.99525	Up	9.64754e-12	2.11278e-10
CL6501.Contig1_All	736	9	146	0.5749	9.1064	3.9855	Up	1.42731e-32	8.03786e-31
Unigene12598_All	696	10	162	0.6755	10.685	3.98349	Up	5.54166e-36	3.44135e-34
CL7231.Contig1_All	1527	9	145	0.2771	4.3591	3.97555	Up	2.6594e-32	1.48176e-30
CL7156.Contig1_All	427	23	370	2.5324	39.778	3.97339	Up	3.26602e-80	4.2234e-78
CL4622.Contig5_All	2792	49	786	0.8251	12.9234	3.96927	Up	1.76747e-168	5.22496e-166
Unigene6014_All	1686	4	64	0.1115	1.7426	3.96613	Up	6.42692e-15	1.76968e-13
CL10839.Contig2_All	956	2	32	0.0984	1.5366	3.96494	Up	5.31084e-08	8.15601e-07
CL8185.Contig5_All	1674	10	158	0.2809	4.3328	3.94717	Up	6.6604e-35	3.97873e-33
CL9831.Contig3_All	649	4	63	0.2898	4.4562	3.94268	Up	1.19777e-14	3.21893e-13
CL7081.Contig1_All	942	3	47	0.1497	2.2904	3.93545	Up	3.35852e-11	7.05231e-10
CL6905.Contig1_All	290	3	47	0.4864	7.4399	3.93507	Up	3.35852e-11	7.05476e-10
CL1525.Contig7_All	597	3	47	0.2363	3.614	3.9349	Up	3.35852e-11	7.05353e-10
CL4613.Contig1_All	885	2	31	0.1062	1.608	3.92041	Up	9.91466e-08	1.47413e-06
Unigene7233_All	529	2	31	0.1777	2.6901	3.92014	Up	9.91466e-08	1.47431e-06
CL7408.Contig3_All	1054	2	31	0.0892	1.3502	3.91999	Up	9.91466e-08	1.47467e-06
CL17018.Contig1_All	280	2	31	0.3358	5.0825	3.91986	Up	9.91466e-08	1.47449e-06
CL9886.Contig2_All	985	10	155	0.4773	7.2238	3.91979	Up	4.28292e-34	2.50891e-32
CL14462.Contig1_All	1240	56	866	2.1232	32.0602	3.91647	Up	1.29816e-183	4.39658e-181
CL5402.Contig3_All	950	235	3620	11.6299	174.926	3.91083	Up	0	0
CL8228.Contig2_All	1395	20	307	0.674	10.1026	3.90583	Up	5.61794e-66	6.19192e-64
CL444.Contig1_All	668	3	46	0.2111	3.1612	3.90447	Up	6.2557e-11	1.28524e-09
CL11553.Contig1_All	435	31	474	3.3505	50.0217	3.90011	Up	6.32232e-101	1.01651e-98
Unigene17944_All	1377	5	76	0.1707	2.5337	3.89171	Up	2.83186e-17	8.87492e-16
CL7402.Contig2_All	2032	16	243	0.3702	5.4897	3.89035	Up	2.2431e-52	1.98833e-50
Unigene6257_All	1749	89	1340	2.3924	35.171	3.87786	Up	4.94334e-281	2.94428e-278
CL8193.Contig3_All	2106	2	30	0.0446	0.6539	3.87395	Up	1.84785e-07	2.66166e-06
Unigene35358_All	907	3	45	0.1555	2.2776	3.87253	Up	1.16382e-10	2.33823e-09
CL8078.Contig1_All	549	3	45	0.2569	3.7628	3.87253	Up	1.16382e-10	2.33862e-09
CL3336.Contig1_All	1624	4	60	0.1158	1.696	3.87243	Up	7.71186e-14	1.96218e-12
Unigene37148_All	542	2	30	0.1735	2.5409	3.87233	Up	1.84785e-07	2.66039e-06
Unigene16689_All	346	2	30	0.2718	3.9803	3.87226	Up	1.84785e-07	2.66071e-06
CL15853.Contig1_All	719	2	30	0.1308	1.9154	3.87221	Up	1.84785e-07	2.66134e-06
CL13661.Contig2_All	724	2	30	0.1299	1.9022	3.8722	Up	1.84785e-07	2.66103e-06
CL942.Contig3_All	642	11	163	0.8055	11.6553	3.85496	Up	2.35264e-35	1.43301e-33
CL10205.Contig3_All	652	5	74	0.3605	5.2102	3.85327	Up	9.76372e-17	2.96835e-15
CL7906.Contig2_All	3680	19	281	0.2427	3.5053	3.85229	Up	6.77502e-60	6.81493e-58
CL8185.Contig6_All	1465	7	103	0.2246	3.2275	3.84499	Up	8.85602e-23	3.55145e-21
CL6633.Contig3_All	766	15	220	0.9206	13.1845	3.84012	Up	4.25452e-47	3.38425e-45
CL17691.Contig2_All	1021	5	73	0.2302	3.2822	3.8337	Up	1.81081e-16	5.41531e-15
CL13372.Contig2_All	738	6	87	0.3822	5.4117	3.82368	Up	2.33116e-19	8.15084e-18
Unigene22699_All	641	2	29	0.1467	2.0769	3.82349	Up	3.43784e-07	4.77938e-06
Unigene2762_All	415	2	29	0.2266	3.2079	3.82341	Up	3.43784e-07	4.77993e-06
CL16664.Contig1_All	1771	8	116	0.2124	3.0068	3.82337	Up	2.16068e-25	9.6578e-24
CL8629.Contig6_All	1900	4	58	0.099	1.4013	3.82319	Up	2.6564e-13	6.48325e-12
CL3419.Contig1_All	743	2	29	0.1266	1.7918	3.82306	Up	3.43784e-07	4.78048e-06
Unigene13743_All	780	2	29	0.1206	1.7068	3.82299	Up	3.43784e-07	4.77883e-06
CL7906.Contig3_All	3640	12	173	0.155	2.1818	3.81518	Up	3.72318e-37	2.37804e-35
CL14908.Contig1_All	1078	3	43	0.1308	1.8311	3.80728	Up	4.01294e-10	7.67838e-09
CL8010.Contig1_All	896	3	43	0.1574	2.2031	3.80703	Up	4.01294e-10	7.67959e-09
CL9690.Contig1_All	1600	12	172	0.3526	4.9349	3.80692	Up	6.88676e-37	4.37554e-35
Unigene1331_All	1206	4	57	0.1559	2.1697	3.7988	Up	4.92268e-13	1.1807e-11
Unigene35106_All	282	4	57	0.6669	9.2789	3.79841	Up	4.92268e-13	1.18094e-11
Unigene11610_All	763	28	396	1.7253	23.8254	3.78758	Up	1.02397e-82	1.36652e-80
Unigene1554_All	1600	116	1637	3.4086	46.9676	3.78441	Up	0	0
Unigene35231_All	1029	9	127	0.4112	5.6658	3.78437	Up	1.81269e-27	8.71099e-26
Unigene15809_All	1682	10	141	0.2795	3.8482	3.78326	Up	2.41568e-30	1.26934e-28
CL3795.Contig7_All	1356	2	28	0.0693	0.9479	3.77381	Up	6.38394e-07	8.57728e-06
CL8474.Contig1_All	853	2	28	0.1102	1.5069	3.77339	Up	6.38394e-07	8.57823e-06
CL9182.Contig1_All	634	2	28	0.1483	2.0274	3.77304	Up	6.38394e-07	8.58109e-06
Unigene28795_All	665	2	28	0.1414	1.9329	3.77291	Up	6.38394e-07	8.58205e-06
CL6467.Contig5_All	515	2	28	0.1826	2.4959	3.7728	Up	6.38394e-07	8.57919e-06
Unigene22095_All	587	4	56	0.3204	4.3794	3.77279	Up	9.11284e-13	2.14611e-11
CL3349.Contig2_All	1789	6	84	0.1577	2.1555	3.77277	Up	1.47709e-18	4.95676e-17
Unigene17510_All	678	2	28	0.1387	1.8958	3.77277	Up	6.38394e-07	8.58014e-06
CL8783.Contig3_All	1468	3	42	0.0961	1.3134	3.77263	Up	7.43674e-10	1.39189e-08
CL7301.Contig1_All	1118	3	42	0.1262	1.7246	3.77248	Up	7.43674e-10	1.39168e-08
Unigene22136_All	1830	3	42	0.0771	1.0536	3.77245	Up	7.43674e-10	1.39146e-08
Unigene18089_All	1445	8	111	0.2603	3.5263	3.75991	Up	4.6702e-24	1.98197e-22
CL6633.Contig4_All	914	66	911	3.3949	45.7553	3.7525	Up	8.55386e-187	2.98049e-184
Unigene24291_All	505	4	55	0.3724	4.9997	3.74692	Up	1.68513e-12	3.892e-11
Unigene25072_All	1318	4	55	0.1427	1.9157	3.74681	Up	1.68513e-12	3.89274e-11
CL1812.Contig3_All	1946	59	806	1.4254	19.0135	3.73759	Up	6.09634e-165	1.74254e-162
CL5831.Contig6_All	1342	17	232	0.5956	7.9361	3.73601	Up	1.44759e-48	1.18742e-46
CL16966.Contig3_All	2104	30	408	0.6704	8.9019	3.73102	Up	3.48892e-84	4.76653e-82
CL3918.Contig1_All	349	22	298	2.9637	39.1977	3.7253	Up	7.98104e-62	8.25468e-60
CL9042.Contig2_All	553	2	27	0.17	2.2413	3.72073	Up	1.1831e-06	1.52844e-05
CL14904.Contig10_All	997	2	27	0.0943	1.2432	3.72066	Up	1.1831e-06	1.5286e-05
CL162.Contig1_All	536	4	54	0.3509	4.6249	3.72029	Up	3.11262e-12	7.04758e-11
Unigene2192_All	519	7	94	0.6341	8.3144	3.71283	Up	2.23078e-20	8.15847e-19
CL3683.Contig3_All	904	6	80	0.312	4.0625	3.70275	Up	1.71374e-17	5.42847e-16
CL8334.Contig1_All	542	3	40	0.2602	3.3879	3.7027	Up	2.54308e-09	4.52574e-08
CL3529.Contig3_All	315	3	40	0.4478	5.8293	3.7024	Up	2.54308e-09	4.52707e-08
CL15869.Contig2_All	1255	3	40	0.1124	1.4631	3.70231	Up	2.54308e-09	4.52641e-08
Unigene18217_All	1499	8	106	0.2509	3.2462	3.69357	Up	9.94952e-23	3.98337e-21
CL7703.Contig2_All	1191	34	450	1.3421	17.3448	3.69194	Up	6.4943e-92	9.43765e-90
CL6243.Contig4_All	2099	46	608	1.0303	13.2972	3.68999	Up	1.45161e-123	2.94483e-121
CL14077.Contig1_All	1128	5	66	0.2084	2.686	3.68803	Up	1.33403e-14	3.57242e-13
CL6501.Contig2_All	838	17	224	0.9538	12.2708	3.6854	Up	1.90814e-46	1.49714e-44
CL3743.Contig7_All	2247	7	92	0.1465	1.8796	3.68145	Up	7.5661e-20	2.70651e-18
CL15607.Contig2_All	546	8	105	0.6889	8.8281	3.67974	Up	1.83102e-22	7.25138e-21
Unigene35340_All	2086	9	118	0.2028	2.5968	3.67861	Up	4.46398e-25	1.97487e-23
CL658.Contig5_All	3315	36	469	0.5106	6.4947	3.669	Up	2.97338e-95	4.47146e-93
CL7475.Contig3_All	2363	13	169	0.2586	3.2832	3.66631	Up	3.04374e-35	1.84006e-33
CL6633.Contig2_All	471	2	26	0.1996	2.5341	3.66629	Up	2.1879e-06	2.72576e-05
Unigene235_All	1150	4	52	0.1635	2.0757	3.66624	Up	1.05822e-11	2.30869e-10
Unigene42940_All	848	3	39	0.1663	2.1112	3.6662	Up	4.69204e-09	8.12642e-08
CL1238.Contig5_All	364	2	26	0.2583	3.279	3.66614	Up	2.1879e-06	2.7266e-05
CL7285.Contig9_All	382	3	39	0.3692	4.6867	3.6661	Up	4.69204e-09	8.12409e-08
CL5422.Contig1_All	485	3	39	0.2908	3.6914	3.66607	Up	4.69204e-09	8.12525e-08
CL5822.Contig1_All	451	2	26	0.2085	2.6465	3.66597	Up	2.1879e-06	2.72632e-05
CL11887.Contig2_All	676	2	26	0.1391	1.7656	3.66596	Up	2.1879e-06	2.72548e-05
Unigene28622_All	649	4	52	0.2898	3.6781	3.66583	Up	1.05822e-11	2.30828e-10
CL12976.Contig1_All	874	2	26	0.1076	1.3656	3.66578	Up	2.1879e-06	2.72604e-05
CL15118.Contig1_All	691	2	26	0.1361	1.7273	3.66578	Up	2.1879e-06	2.72688e-05
CL17098.Contig1_All	1063	37	476	1.6364	20.5562	3.65098	Up	2.89488e-96	4.43056e-94
Unigene35570_All	728	5	64	0.3229	4.0357	3.64366	Up	4.51842e-14	1.16908e-12
CL10618.Contig1_All	1779	19	243	0.5021	6.2705	3.64253	Up	8.47986e-50	7.12992e-48
Unigene28105_All	574	26	332	2.1296	26.5519	3.64016	Up	1.86547e-67	2.10401e-65
CL16891.Contig1_All	519	4	51	0.3623	4.511	3.63819	Up	1.9476e-11	4.16044e-10
Unigene28423_All	639	4	51	0.2943	3.6639	3.63802	Up	1.9476e-11	4.15971e-10
CL8529.Contig3_All	2518	15	191	0.2801	3.4821	3.63594	Up	2.14652e-39	1.44505e-37
Unigene28951_All	976	3	38	0.1445	1.7873	3.62864	Up	8.64296e-09	1.45523e-07
Unigene16629_All	772	11	139	0.6699	8.2655	3.62508	Up	5.63218e-29	2.83858e-27
CL13408.Contig2_All	1270	29	364	1.0736	13.1573	3.61533	Up	2.11206e-73	2.54348e-71
Unigene27955_All	1418	2	25	0.0663	0.8093	3.60959	Up	4.03686e-06	4.82921e-05
CL5561.Contig1_All	478	2	25	0.1967	2.4009	3.60951	Up	4.03686e-06	4.82969e-05
Unigene18115_All	958	4	50	0.1963	2.3959	3.60944	Up	3.57984e-11	7.50011e-10
Unigene3014_All	517	2	25	0.1819	2.2198	3.60921	Up	4.03686e-06	4.83065e-05
Unigene10210_All	1005	2	25	0.0936	1.1419	3.60878	Up	4.03686e-06	4.83017e-05
Unigene11848_All	1845	69	858	1.7583	21.3482	3.60186	Up	2.80836e-170	8.46766e-168
Unigene15811_All	441	5	62	0.533	6.4539	3.59796	Up	1.52402e-13	3.79383e-12
Unigene17511_All	1565	5	62	0.1502	1.8186	3.59787	Up	1.52402e-13	3.79305e-12
Unigene22639_All	919	5	62	0.2558	3.097	3.59778	Up	1.52402e-13	3.79461e-12
CL1990.Contig3_All	1291	58	716	2.1122	25.4599	3.59141	Up	4.88604e-142	1.14934e-139
Unigene18037_All	1178	9	111	0.3592	4.3256	3.59004	Up	3.13218e-23	1.27984e-21
CL1238.Contig1_All	729	3	37	0.1935	2.3299	3.58986	Up	1.58939e-08	2.59338e-07
Unigene22159_All	854	4	49	0.2202	2.634	3.58037	Up	6.57122e-11	1.34686e-09
Unigene5752_All	831	8	98	0.4526	5.4137	3.58031	Up	1.2848e-20	4.752e-19
Unigene35639_All	801	4	49	0.2348	2.8082	3.58014	Up	6.57122e-11	1.34709e-09
CL9380.Contig4_All	464	6	73	0.6079	7.2223	3.57055	Up	1.21021e-15	3.46576e-14
CL7318.Contig2_All	431	7	85	0.7636	9.0534	3.56757	Up	5.30926e-18	1.73074e-16
Unigene21710_All	730	74	894	4.7659	56.2191	3.56024	Up	1.23369e-175	3.91505e-173
CL8799.Contig3_All	2251	18	217	0.3759	4.4254	3.55739	Up	8.75338e-44	6.49297e-42
CL132.Contig3_All	2000	2	24	0.047	0.5509	3.55106	Up	7.43014e-06	8.52661e-05
CL6402.Contig2_All	1341	2	24	0.0701	0.8216	3.55095	Up	7.43014e-06	8.5258e-05
CL4928.Contig2_All	603	2	24	0.1559	1.8271	3.55086	Up	7.43014e-06	8.52742e-05
CL8303.Contig3_All	672	2	24	0.1399	1.6395	3.55079	Up	7.43014e-06	8.52904e-05
CL899.Contig3_All	751	3	36	0.1878	2.2006	3.55063	Up	2.91762e-08	4.62338e-07
CL8768.Contig1_All	548	13	156	1.1153	13.0681	3.55055	Up	7.97872e-32	4.37502e-30
CL1541.Contig4_All	592	17	204	1.3501	15.819	3.55052	Up	3.48128e-41	2.4415e-39
Unigene18757_All	802	4	48	0.2345	2.7475	3.55046	Up	1.20455e-10	2.41525e-09
CL736.Contig1_All	601	3	36	0.2347	2.7498	3.55044	Up	2.91762e-08	4.62398e-07
CL5437.Contig2_All	1242	5	60	0.1893	2.2177	3.55032	Up	5.11766e-13	1.22649e-11
CL10751.Contig1_All	1206	2	24	0.078	0.9136	3.55002	Up	7.43014e-06	8.52823e-05
CL6976.Contig4_All	1489	62	740	1.9576	22.8143	3.54278	Up	4.47286e-145	1.07945e-142
Unigene17871_All	1701	42	498	1.1609	13.4399	3.53321	Up	5.90124e-98	9.18285e-96
Unigene13207_All	607	6	71	0.4647	5.3696	3.53044	Up	4.05028e-15	1.12707e-13
CL9508.Contig2_All	1249	33	390	1.2422	14.3341	3.52848	Up	5.6798e-77	7.0579e-75
CL13407.Contig3_All	711	5	59	0.3306	3.8094	3.52641	Up	9.36164e-13	2.20213e-11
CL4988.Contig1_All	1979	64	752	1.5204	17.4438	3.52019	Up	1.32391e-146	3.21428e-144
Unigene20727_All	1337	12	141	0.422	4.8412	3.52005	Up	1.06876e-28	5.34192e-27
Unigene6427_All	1326	115	1348	4.0774	46.6676	3.5167	Up	3.58886e-261	1.94584e-258
CL3918.Contig3_All	1103	468	5473	19.9481	227.782	3.51333	Up	0	0
CL1690.Contig3_All	978	26	303	1.2499	14.2224	3.50828	Up	7.36896e-60	7.40005e-58
CL13110.Contig2_All	926	8	93	0.4062	4.6104	3.50463	Up	2.6188e-19	9.14598e-18
CL7906.Contig1_All	2299	12	139	0.2454	2.7755	3.49954	Up	3.55224e-28	1.74591e-26
CL2367.Contig1_All	2121	267	3088	5.9184	66.8353	3.49733	Up	0	0
CL17084.Contig2_All	1368	55	635	1.8902	21.3087	3.49483	Up	2.67384e-123	5.39714e-121
CL1812.Contig2_All	1959	60	691	1.44	16.1925	3.49119	Up	6.617e-134	1.44936e-131
CL6116.Contig2_All	404	2	23	0.2327	2.6135	3.48944	Up	1.36399e-05	0.000149626
CL1583.Contig4_All	566	2	23	0.1661	1.8654	3.48936	Up	1.36399e-05	0.000149585
CL27.Contig5_All	1108	4	46	0.1697	1.9058	3.48934	Up	4.02976e-10	7.70812e-09
Unigene36827_All	366	2	23	0.2569	2.8848	3.48919	Up	1.36399e-05	0.000149653
CL7651.Contig3_All	1204	2	23	0.0781	0.8769	3.48902	Up	1.36399e-05	0.000149639
Unigene22255_All	759	2	23	0.1239	1.3911	3.48898	Up	1.36399e-05	0.000149667
Unigene2812_All	667	2	23	0.141	1.583	3.48889	Up	1.36399e-05	0.000149599
CL6043.Contig2_All	1365	2	23	0.0689	0.7735	3.48883	Up	1.36399e-05	0.000149572
CL4813.Contig3_All	1537	2	23	0.0612	0.6869	3.4885	Up	1.36399e-05	0.000149612
Unigene16289_All	802	5	57	0.2931	3.2626	3.47656	Up	3.12116e-12	7.06559e-11
CL12976.Contig2_All	892	3	34	0.1581	1.7498	3.46828	Up	9.77594e-08	1.45511e-06
Unigene36997_All	308	3	34	0.4579	5.0675	3.46817	Up	9.77594e-08	1.45529e-06
CL3361.Contig1_All	275	3	34	0.5129	5.6757	3.46805	Up	9.77594e-08	1.45476e-06
Unigene36788_All	507	3	34	0.2782	3.0785	3.46803	Up	9.77594e-08	1.45494e-06
CL9865.Contig1_All	722	3	34	0.1954	2.1618	3.46773	Up	9.77594e-08	1.45458e-06
CL11597.Contig3_All	758	57	643	3.5354	38.9414	3.46136	Up	8.34806e-124	1.7021e-121
Unigene8969_All	1629	152	1711	4.3869	48.2168	3.45826	Up	0	0
CL15634.Contig2_All	1190	4	45	0.158	1.7359	3.45769	Up	7.35368e-10	1.3772e-08
Unigene12541_All	1555	12	135	0.3628	3.9854	3.45748	Up	3.89812e-27	1.85192e-25
Unigene23307_All	1244	4	45	0.1512	1.6606	3.45717	Up	7.35368e-10	1.37698e-08
CL1837.Contig1_All	1926	9	101	0.2197	2.4073	3.45381	Up	1.28501e-20	4.75133e-19
CL10796.Contig3_All	1687	34	381	0.9475	10.3676	3.45181	Up	7.60312e-74	9.20198e-72
CL1879.Contig6_All	1142	5	56	0.2058	2.2511	3.45132	Up	5.68806e-12	1.26468e-10
CL7497.Contig1_All	492	5	56	0.4778	5.2251	3.45098	Up	5.68806e-12	1.26491e-10
CL3127.Contig1_All	1202	106	1184	4.146	45.2186	3.44712	Up	1.08965e-225	4.79082e-223
CL17516.Contig1_All	1040	6	67	0.2712	2.9574	3.4469	Up	4.48042e-14	1.1595e-12
Unigene26978_All	1864	21	234	0.5297	5.7629	3.44355	Up	7.5516e-46	5.85288e-44
CL3407.Contig5_All	1784	23	256	0.6061	6.5874	3.44208	Up	5.32774e-50	4.50466e-48
CL17098.Contig3_All	1066	47	523	2.0729	22.5224	3.44164	Up	1.62987e-100	2.60322e-98
CL13408.Contig1_All	1270	44	489	1.6288	17.6756	3.43988	Up	4.82084e-94	7.14311e-92
CL1610.Contig1_All	1033	9	100	0.4096	4.4439	3.43954	Up	2.336e-20	8.53812e-19
Unigene11303_All	2081	14	155	0.3163	3.4192	3.43429	Up	8.80378e-31	4.68507e-29
Unigene49357_All	714	15	166	0.9877	10.6728	3.43372	Up	7.31006e-33	4.16515e-31
CL2367.Contig2_All	2134	1442	15944	31.769	342.983	3.43244	Up	0	0
Unigene18771_All	520	2	22	0.1808	1.9422	3.42523	Up	2.4969e-05	0.000261336
CL13375.Contig2_All	1005	8	88	0.3742	4.0196	3.42517	Up	5.23142e-18	1.70629e-16
CL4753.Contig1_All	634	2	22	0.1483	1.593	3.42516	Up	2.4969e-05	0.000261313
Unigene36205_All	252	2	22	0.3731	4.0077	3.42514	Up	2.4969e-05	0.000261155
CL7735.Contig2_All	748	2	22	0.1257	1.3502	3.42512	Up	2.4969e-05	0.000261245
CL5182.Contig1_All	2733	2	22	0.0344	0.3695	3.42509	Up	2.4969e-05	0.000261132
Unigene35839_All	454	4	44	0.4142	4.449	3.42508	Up	1.33976e-09	2.4462e-08
Unigene24904_All	734	2	22	0.1281	1.3759	3.42503	Up	2.4969e-05	0.000261223
CL11340.Contig1_All	800	6	66	0.3526	3.7872	3.42503	Up	8.1485e-14	2.06892e-12
Unigene35029_All	330	3	33	0.4274	4.5906	3.42502	Up	1.78404e-07	2.57251e-06
CL15869.Contig3_All	379	2	22	0.2481	2.6647	3.42498	Up	2.4969e-05	0.0002612
CL3506.Contig6_All	1124	31	341	1.2967	13.927	3.42497	Up	8.12582e-66	8.9154e-64
CL12495.Contig3_All	395	3	33	0.3571	3.8352	3.4249	Up	1.78404e-07	2.5722e-06
Unigene15604_All	1327	6	66	0.2126	2.2832	3.42484	Up	8.1485e-14	2.06848e-12
CL872.Contig2_All	596	2	22	0.1578	1.6945	3.42469	Up	2.4969e-05	0.000261268
Unigene16844_All	1121	2	22	0.0839	0.9009	3.42462	Up	2.4969e-05	0.000261178
CL13259.Contig2_All	1415	2	22	0.0665	0.7137	3.42389	Up	2.4969e-05	0.000261291
Unigene12757_All	955	6	65	0.2954	3.1245	3.40288	Up	1.48023e-13	3.68861e-12
Unigene28436_All	1252	11	119	0.4131	4.3633	3.40086	Up	9.33748e-24	3.91462e-22
Unigene1227_All	846	34	367	1.8895	19.9143	3.39773	Up	3.14684e-70	3.68323e-68
Unigene17870_All	915	4	43	0.2055	2.1573	3.39202	Up	2.43678e-09	4.34552e-08
CL706.Contig8_All	873	17	182	0.9155	9.5703	3.38593	Up	1.79665e-35	1.09878e-33
CL6605.Contig1_All	1568	30	321	0.8995	9.3978	3.38513	Up	2.01386e-61	2.07227e-59
CL14462.Contig2_All	1220	50	534	1.9268	20.0933	3.38244	Up	4.73516e-101	7.63358e-99
Unigene35460_All	646	3	32	0.2183	2.274	3.38085	Up	3.24868e-07	4.53099e-06
Unigene16006_All	524	3	32	0.2692	2.8034	3.38043	Up	3.24868e-07	4.53151e-06
Unigene16702_All	758	8	85	0.4962	5.1478	3.37496	Up	3.12134e-17	9.74929e-16
CL4857.Contig2_All	1065	5	53	0.2207	2.2845	3.37172	Up	3.4147e-11	7.16779e-10
CL8230.Contig2_All	2316	20	212	0.406	4.2021	3.37156	Up	6.22006e-41	4.33211e-39
CL14130.Contig2_All	752	10	106	0.6252	6.4708	3.37155	Up	3.73768e-21	1.41179e-19
Unigene28189_All	739	7	74	0.4453	4.5968	3.36778	Up	3.87862e-15	1.08054e-13
Unigene24951_All	1619	127	1340	3.688	37.9951	3.3649	Up	8.61178e-250	4.35662e-247
CL16958.Contig2_All	1793	11	116	0.2884	2.9699	3.36427	Up	5.5435e-23	2.2409e-21
CL10995.Contig2_All	1758	57	600	1.5244	15.6676	3.36147	Up	1.02802e-112	1.8663e-110
CL5601.Contig3_All	1185	2	21	0.0793	0.8135	3.35875	Up	4.55686e-05	0.000452869
CL11660.Contig1_All	918	2	21	0.1024	1.0501	3.35824	Up	4.55686e-05	0.000453018
Unigene38752_All	395	2	21	0.238	2.4406	3.3582	Up	4.55686e-05	0.000452981
CL11242.Contig1_All	1190	2	21	0.079	0.8101	3.35818	Up	4.55686e-05	0.000453056
Unigene31637_All	745	2	21	0.1262	1.294	3.35805	Up	4.55686e-05	0.000452944
CL14691.Contig2_All	399	4	42	0.4713	4.8322	3.35796	Up	4.42426e-09	7.68024e-08
CL7774.Contig2_All	562	2	21	0.1673	1.7153	3.35795	Up	4.55686e-05	0.000453093
Unigene36814_All	736	4	42	0.2555	2.6196	3.35795	Up	4.42426e-09	7.67913e-08
CL17098.Contig2_All	1117	76	798	3.1988	32.7959	3.35791	Up	3.33642e-149	8.30041e-147
CL4948.Contig4_All	1010	4	42	0.1862	1.909	3.35789	Up	4.42426e-09	7.67803e-08
CL13544.Contig3_All	1053	8	84	0.3572	3.662	3.35783	Up	5.65068e-17	1.74601e-15
CL10534.Contig1_All	501	2	21	0.1877	1.9242	3.35776	Up	4.55686e-05	0.000453167
CL14130.Contig1_All	703	6	63	0.4013	4.1139	3.35775	Up	4.8669e-13	1.16825e-11
Unigene12522_All	1264	2	21	0.0744	0.7627	3.35774	Up	4.55686e-05	0.000452907
Unigene14466_All	517	2	21	0.1819	1.8647	3.35773	Up	4.55686e-05	0.00045313
Unigene26451_All	405	2	21	0.2322	2.3803	3.3577	Up	4.55686e-05	0.000452832
Unigene11971_All	967	4	42	0.1945	1.9938	3.35768	Up	4.42426e-09	7.68134e-08
CL2884.Contig3_All	1525	6	63	0.185	1.8964	3.35767	Up	4.8669e-13	1.16802e-11
CL16743.Contig4_All	4824	13	136	0.1267	1.2942	3.35257	Up	1.23184e-26	5.74612e-25
Unigene17932_All	1122	35	365	1.4666	14.9338	3.34803	Up	5.85048e-69	6.74971e-67
CL5902.Contig3_All	1192	7	73	0.2761	2.8114	3.34803	Up	7.02082e-15	1.92532e-13
Unigene3585_All	1304	7	73	0.2524	2.5699	3.34793	Up	7.02082e-15	1.92576e-13
CL7318.Contig1_All	431	8	83	0.8727	8.8404	3.34055	Up	1.02197e-16	3.10307e-15
CL15077.Contig1_All	783	3	31	0.1801	1.8175	3.33509	Up	5.9022e-07	7.98683e-06
CL11958.Contig1_All	845	6	62	0.3338	3.3683	3.33496	Up	8.80836e-13	2.07724e-11
Unigene3012_All	551	3	31	0.256	2.5827	3.33466	Up	5.9022e-07	7.98504e-06
Unigene8440_All	2970	3	31	0.0475	0.4792	3.33463	Up	5.9022e-07	7.98594e-06
Unigene36106_All	737	3	31	0.1914	1.9309	3.33461	Up	5.9022e-07	7.98415e-06
CL18099.Contig2_All	1384	45	464	1.5287	15.3905	3.33166	Up	7.50524e-87	1.0515e-84
CL6280.Contig10_All	884	7	72	0.3723	3.739	3.32811	Up	1.26944e-14	3.40474e-13
CL8185.Contig12_All	1616	53	542	1.5419	15.3967	3.31984	Up	7.5033e-101	1.20319e-98
Unigene663_All	832	578	5905	32.6615	325.811	3.31837	Up	0	0
CL5831.Contig1_All	1137	5	51	0.2067	2.0591	3.3164	Up	1.11972e-10	2.25338e-09
Unigene24813_All	806	50	510	2.9165	29.0472	3.31609	Up	6.72412e-95	1.00619e-92
CL4753.Contig2_All	646	6	61	0.4367	4.3348	3.31125	Up	1.59209e-12	3.68133e-11
CL16906.Contig2_All	683	9	91	0.6195	6.1163	3.30348	Up	4.8802e-18	1.59647e-16
CL3398.Contig14_All	254	9	91	1.6659	16.4466	3.30342	Up	4.8802e-18	1.59604e-16
CL2626.Contig3_All	383	12	121	1.473	14.5029	3.29951	Up	1.58006e-23	6.55149e-22
CL946.Contig2_All	1691	294	2960	8.174	80.3559	3.29729	Up	0	0
CL1814.Contig1_All	5140	3	30	0.0274	0.2679	3.28945	Up	1.06972e-06	1.39312e-05
CL9463.Contig3_All	1770	117	1171	3.1077	30.3706	3.28876	Up	4.88428e-214	1.98838e-211
CL773.Contig11_All	1382	2	20	0.068	0.6643	3.28823	Up	8.28896e-05	0.000778772
Unigene7968_All	1472	3	30	0.0958	0.9356	3.28779	Up	1.06972e-06	1.39342e-05
Unigene1962_All	371	2	20	0.2534	2.4747	3.28777	Up	8.28896e-05	0.000778469
Unigene2289_All	545	2	20	0.1725	1.6846	3.28774	Up	8.28896e-05	0.000778409
CL1122.Contig21_All	575	2	20	0.1635	1.5967	3.28773	Up	8.28896e-05	0.00077859
Unigene28849_All	540	2	20	0.1741	1.7002	3.28772	Up	8.28896e-05	0.000779014
Unigene1785_All	635	3	30	0.2221	2.1688	3.28762	Up	1.06972e-06	1.39357e-05
Unigene35966_All	369	2	20	0.2548	2.4881	3.28761	Up	8.28896e-05	0.000778651
CL5132.Contig5_All	1259	10	100	0.3734	3.6462	3.2876	Up	1.29509e-19	4.59065e-18
CL6409.Contig2_All	365	2	20	0.2576	2.5154	3.28758	Up	8.28896e-05	0.000778832
Unigene13065_All	504	5	50	0.4664	4.5542	3.28756	Up	2.02286e-10	3.9782e-09
Unigene28120_All	1437	12	120	0.3926	3.8335	3.28753	Up	2.84574e-23	1.16556e-21
Unigene30924_All	707	12	120	0.798	7.7917	3.28748	Up	2.84574e-23	1.16595e-21
Unigene35058_All	357	2	20	0.2634	2.5718	3.28745	Up	8.28896e-05	0.000778349
Unigene10588_All	513	2	20	0.1833	1.7897	3.28744	Up	8.28896e-05	0.00077853
Unigene6339_All	858	2	20	0.1096	1.0701	3.28743	Up	8.28896e-05	0.000779075
Unigene28136_All	1318	15	150	0.5351	5.2245	3.28741	Up	9.49526e-29	4.75187e-27
CL14283.Contig1_All	695	2	20	0.1353	1.321	3.2874	Up	8.28896e-05	0.000778711
CL3095.Contig4_All	1346	3	30	0.1048	1.0232	3.28738	Up	1.06972e-06	1.39327e-05
Unigene19109_All	1238	5	50	0.1899	1.854	3.28733	Up	2.02286e-10	3.97885e-09
CL9380.Contig3_All	2975	18	180	0.2845	2.7775	3.28729	Up	3.2313e-34	1.90117e-32
Unigene19304_All	1271	2	20	0.074	0.7224	3.2872	Up	8.28896e-05	0.000778954
CL4340.Contig2_All	740	2	20	0.1271	1.2407	3.28712	Up	8.28896e-05	0.000778893
CL8768.Contig2_All	1649	67	667	1.9102	18.5684	3.28105	Up	2.05928e-122	4.12224e-120
CL2501.Contig2_All	2434	49	485	0.9465	9.1473	3.27267	Up	2.91834e-89	4.16589e-87
CL3361.Contig3_All	1328	36	356	1.2745	12.3061	3.27137	Up	6.36432e-66	6.99543e-64
CL5902.Contig1_All	1186	24	237	0.9514	9.1735	3.26935	Up	2.25652e-44	1.6946e-42
CL6605.Contig3_All	1598	7	69	0.2059	1.9822	3.26709	Up	7.45168e-14	1.89917e-12
Unigene10417_All	977	6	59	0.2887	2.7722	3.26339	Up	5.18016e-12	1.15494e-10
CL11541.Contig4_All	2614	143	1405	2.5719	24.674	3.26209	Up	1.5944e-254	8.23829e-252
CL7475.Contig4_All	4188	52	510	0.5838	5.5903	3.25938	Up	1.96676e-93	2.89643e-91
CL7173.Contig4_All	461	5	49	0.5099	4.8794	3.25842	Up	3.6485e-10	7.01101e-09
Unigene11863_All	2001	16	156	0.3759	3.5789	3.2511	Up	1.48822e-29	7.63096e-28
CL12571.Contig2_All	1238	22	214	0.8355	7.9353	3.24757	Up	5.67702e-40	3.86921e-38
CL16061.Contig1_All	1432	264	2566	8.6675	82.2589	3.24648	Up	0	0
Unigene22206_All	937	7	68	0.3512	3.3315	3.24581	Up	1.34095e-13	3.34775e-12
CL12812.Contig3_All	1959	487	4726	11.6876	110.746	3.24421	Up	0	0
CL5931.Contig5_All	1716	108	1046	2.959	27.9823	3.24133	Up	7.63346e-189	2.69867e-186
Unigene35315_All	714	3	29	0.1975	1.8645	3.23886	Up	1.93378e-06	2.43096e-05
Unigene23788_All	1605	9	87	0.2636	2.4884	3.2388	Up	5.12062e-17	1.58709e-15
CL5948.Contig9_All	601	9	87	0.704	6.6453	3.23869	Up	5.12062e-17	1.58668e-15
CL1201.Contig4_All	298	3	29	0.4733	4.4674	3.23861	Up	1.93378e-06	2.43122e-05
Unigene15912_All	848	8	77	0.4435	4.1684	3.23249	Up	3.4998e-15	9.77035e-14
CL5223.Contig1_All	509	7	67	0.6466	6.0426	3.22422	Up	2.41e-13	5.90812e-12
Unigene24185_All	2055	44	421	1.0066	9.4046	3.22388	Up	1.22433e-76	1.51983e-74
CL3918.Contig2_All	285	32	305	5.2788	49.1275	3.21825	Up	7.2113e-56	6.79053e-54
CL7994.Contig2_All	1969	62	590	1.4804	13.7555	3.21595	Up	1.68242e-106	2.83311e-104
Unigene31279_All	1241	4	38	0.1515	1.4057	3.2139	Up	4.71644e-08	7.28202e-07
CL8920.Contig1_All	1093	8	76	0.3441	3.192	3.21356	Up	6.28262e-15	1.73231e-13
CL522.Contig1_All	547	4	38	0.3438	3.1891	3.21351	Up	4.71644e-08	7.28388e-07
CL4408.Contig3_All	1715	14	133	0.3838	3.5601	3.21349	Up	3.81748e-25	1.69195e-23
CL13407.Contig2_All	768	4	38	0.2449	2.2714	3.21332	Up	4.71644e-08	7.28295e-07
CL5209.Contig10_All	1264	6	57	0.2232	2.0701	3.21329	Up	1.67582e-11	3.60213e-10
CL13805.Contig2_All	316	17	161	2.5293	23.3888	3.20901	Up	4.1487e-30	2.16492e-28
CL6375.Contig1_All	1286	15	142	0.5484	5.0689	3.20837	Up	1.02482e-26	4.80082e-25
CL13880.Contig6_All	769	13	123	0.7948	7.3426	3.20763	Up	2.5536e-23	1.04803e-21
CL9073.Contig3_All	770	30	283	1.8317	16.8719	3.20337	Up	9.90976e-52	8.68239e-50
CL10312.Contig2_All	831	108	1018	6.1102	56.2362	3.20221	Up	9.1213e-182	3.05495e-179
CL1104.Contig3_All	701	22	206	1.4755	13.4902	3.19264	Up	6.01496e-38	3.91419e-36
Unigene21161_All	2220	25	234	0.5294	4.8387	3.19219	Up	6.74392e-43	4.91794e-41
CL4775.Contig2_All	1757	432	4033	11.5596	105.372	3.18833	Up	0	0
CL6661.Contig4_All	1258	3	28	0.1121	1.0218	3.18825	Up	3.4863e-06	4.211e-05
Unigene11529_All	588	6	56	0.4797	4.372	3.18809	Up	3.00736e-11	6.34468e-10
Unigene1667_All	633	3	28	0.2228	2.0306	3.18808	Up	3.4863e-06	4.21143e-05
Unigene49377_All	242	3	28	0.5828	5.3114	3.18802	Up	3.4863e-06	4.21058e-05
Unigene1964_All	1038	6	56	0.2718	2.4766	3.18774	Up	3.00736e-11	6.34358e-10
CL8185.Contig2_All	1363	91	849	3.1389	28.5944	3.1874	Up	3.14532e-151	7.97263e-149
CL6243.Contig2_All	2149	58	541	1.2689	11.5566	3.18707	Up	5.58954e-97	8.59822e-95
CL2626.Contig5_All	1774	157	1464	4.1608	37.8841	3.18666	Up	2.12188e-259	1.13519e-256
CL6886.Contig3_All	1583	20	186	0.594	5.3939	3.18279	Up	2.61792e-34	1.54706e-32
CL6243.Contig6_All	2095	50	465	1.1221	10.1892	3.18277	Up	1.75004e-83	2.36683e-81
Unigene19257_All	1204	10	93	0.3905	3.5459	3.18276	Up	7.78842e-18	2.51182e-16
CL12871.Contig2_All	1586	21	195	0.6225	5.6442	3.18062	Up	7.08822e-36	4.38151e-34
CL3487.Contig3_All	1156	65	603	2.6436	23.9458	3.1792	Up	1.18848e-107	2.03536e-105
CL1541.Contig3_All	342	40	371	5.4988	49.7986	3.17892	Up	7.39424e-67	8.24744e-65
Unigene17931_All	1078	35	324	1.5264	13.7974	3.17619	Up	1.53648e-58	1.51527e-56
CL3230.Contig3_All	790	4	37	0.238	2.15	3.1753	Up	8.47776e-08	1.2708e-06
CL8721.Contig1_All	1071	8	74	0.3512	3.1718	3.17494	Up	2.01744e-14	5.33285e-13
CL9380.Contig2_All	2130	29	267	0.6401	5.7544	3.1683	Up	2.11148e-48	1.72148e-46
Unigene15726_All	805	22	202	1.2849	11.5193	3.16433	Up	6.12476e-37	3.89549e-35
CL4988.Contig2_All	1960	129	1184	3.0943	27.731	3.16381	Up	1.02197e-208	4.05128e-206
CL14513.Contig1_All	1022	12	110	0.552	4.941	3.16206	Up	9.8004e-21	3.63815e-19
CL7774.Contig1_All	1547	12	110	0.3647	3.2642	3.16195	Up	9.8004e-21	3.63927e-19
CL975.Contig1_All	1239	25	228	0.9486	8.4476	3.15467	Up	2.18482e-41	1.53761e-39
Unigene9055_All	1800	9	82	0.2351	2.0913	3.15305	Up	9.45026e-16	2.72505e-14
Unigene21358_All	1866	295	2673	7.4326	65.7592	3.14525	Up	0	0
CL17938.Contig5_All	1789	17	154	0.4468	3.9517	3.14477	Up	2.41274e-28	1.19118e-26
Unigene23622_All	1070	19	172	0.8348	7.3793	3.14398	Up	1.75446e-31	9.50398e-30
CL2927.Contig1_All	807	4	36	0.233	2.0479	3.13574	Up	1.52037e-07	2.21503e-06
Unigene13147_All	650	4	36	0.2893	2.5425	3.13561	Up	1.52037e-07	2.21476e-06
CL9097.Contig1_All	1015	6	54	0.2779	2.4423	3.1356	Up	9.639e-11	1.94986e-09
CL7613.Contig1_All	1799	3	27	0.0784	0.689	3.13558	Up	6.26704e-06	7.27892e-05
CL3405.Contig3_All	700	8	72	0.5373	4.7218	3.13554	Up	6.4466e-14	1.64857e-12
CL11498.Contig4_All	1243	8	72	0.3026	2.6591	3.13545	Up	6.4466e-14	1.64927e-12
CL14777.Contig1_All	910	3	27	0.155	1.362	3.13539	Up	6.26704e-06	7.27822e-05
Unigene31517_All	1746	13	117	0.3501	3.0762	3.13531	Up	8.3189e-22	3.21144e-20
CL3407.Contig6_All	1728	8	72	0.2177	1.9128	3.13527	Up	6.4466e-14	1.64892e-12
CL8596.Contig1_All	1046	29	260	1.3035	11.4107	3.12992	Up	1.20627e-46	9.51387e-45
CL4738.Contig2_All	2255	30	268	0.6255	5.4558	3.12471	Up	5.84958e-48	4.73084e-46
Unigene6883_All	922	102	908	5.2012	45.2089	3.11969	Up	2.36378e-158	6.35111e-156
Unigene5818_All	1370	9	80	0.3089	2.6806	3.11734	Up	3.00974e-15	8.44319e-14
CL1563.Contig2_All	796	7	62	0.4134	3.5756	3.11258	Up	4.42814e-12	9.91661e-11
CL13626.Contig2_All	1478	61	540	1.9404	16.7722	3.11165	Up	1.21767e-94	1.81536e-92
CL4775.Contig4_All	1644	146	1290	4.1753	36.0211	3.10889	Up	1.8547e-223	8.09559e-221
CL11767.Contig1_All	654	12	106	0.8627	7.4404	3.10845	Up	9.90906e-20	3.53001e-18
CL9508.Contig3_All	1273	6	53	0.2216	1.9112	3.10845	Up	1.72136e-10	3.40576e-09
CL10397.Contig1_All	1733	34	300	0.9224	7.9468	3.10691	Up	3.23998e-53	2.9169e-51
CL11098.Contig2_All	1594	10	88	0.2949	2.5343	3.10329	Up	1.41115e-16	4.24744e-15
Unigene30558_All	2226	10	88	0.2112	1.8148	3.10313	Up	1.41115e-16	4.24639e-15
Unigene9873_All	943	5	44	0.2493	2.142	3.103	Up	6.77928e-09	1.15235e-07
CL10742.Contig1_All	1340	22	193	0.7719	6.6118	3.09856	Up	1.10293e-34	6.57238e-33
CL4096.Contig2_All	1863	1110	9716	28.0119	239.411	3.09538	Up	0	0
Unigene3189_All	1711	8	70	0.2198	1.8781	3.09501	Up	2.04936e-13	5.05475e-12
CL15654.Contig2_All	366	4	35	0.5138	4.3899	3.09491	Up	2.72002e-07	3.83748e-06
CL12739.Contig4_All	1268	24	210	0.8899	7.6027	3.0948	Up	1.44128e-37	9.27915e-36
CL1026.Contig3_All	335	4	35	0.5614	4.7961	3.09476	Up	2.72002e-07	3.83838e-06
CL1558.Contig5_All	2873	4	35	0.0655	0.5592	3.0938	Up	2.72002e-07	3.83793e-06
CL2919.Contig3_All	2355	111	969	2.216	18.8887	3.09149	Up	2.12084e-167	6.1641e-165
CL12844.Contig2_All	725	7	61	0.4539	3.8624	3.08905	Up	7.89182e-12	1.73804e-10
Unigene32062_All	600	7	61	0.5485	4.6671	3.08896	Up	7.89182e-12	1.73836e-10
CL6746.Contig5_All	791	56	488	3.3285	28.3213	3.08894	Up	4.32e-85	5.94224e-83
Unigene11744_All	1328	65	566	2.3012	19.5654	3.08785	Up	2.16392e-98	3.38906e-96
CL2210.Contig5_All	631	3	26	0.2235	1.8915	3.08118	Up	1.12311e-05	0.000124982
Unigene909_All	775	75	650	4.5498	38.5018	3.08105	Up	1.67995e-112	3.03163e-110
CL11831.Contig1_All	1730	39	338	1.0599	8.9689	3.081	Up	2.74928e-59	2.75402e-57
CL10361.Contig1_All	778	3	26	0.1813	1.5341	3.08094	Up	1.12311e-05	0.000124971
CL1965.Contig1_All	850	6	52	0.3319	2.8084	3.08093	Up	3.06872e-10	5.94509e-09
CL5617.Contig2_All	562	3	26	0.251	2.1238	3.08089	Up	1.12311e-05	0.000124994
Unigene36533_All	471	3	26	0.2995	2.5341	3.08085	Up	1.12311e-05	0.000124959
CL4775.Contig3_All	1654	41	354	1.1654	9.8251	3.07565	Up	6.48012e-62	6.70803e-60
CL4115.Contig4_All	617	8	69	0.6096	5.1337	3.07406	Up	3.64658e-13	8.83391e-12
CL1541.Contig1_All	943	177	1526	8.8246	74.2869	3.07351	Up	4.50836e-261	2.43347e-258
CL13375.Contig1_All	1151	21	181	0.8578	7.2189	3.07307	Up	2.27834e-32	1.27414e-30
CL6847.Contig1_All	1136	5	43	0.2069	1.7376	3.07009	Up	1.20905e-08	2.00006e-07
Unigene5693_All	783	5	43	0.3002	2.521	3.07	Up	1.20905e-08	2.00033e-07
CL2626.Contig4_All	1839	120	1030	3.0678	25.7114	3.06713	Up	1.84613e-176	5.92075e-174
CL12880.Contig3_All	509	12	103	1.1084	9.2894	3.06711	Up	5.5653e-19	1.91652e-17
CL14802.Contig1_All	699	34	291	2.2868	19.1111	3.06301	Up	5.64302e-51	4.84578e-49
Unigene1708_All	704	20	171	1.3356	11.1505	3.06155	Up	1.49275e-30	7.89869e-29
CL7850.Contig2_All	1105	53	453	2.255	18.8194	3.06102	Up	2.02752e-78	2.56158e-76
CL9073.Contig2_All	790	17	145	1.0117	8.4258	3.05803	Up	4.2817e-26	1.96021e-24
CL11553.Contig2_All	1096	57	486	2.4451	20.3561	3.0575	Up	6.42278e-84	8.75497e-82
CL16807.Contig3_All	1545	33	281	1.0042	8.3492	3.05559	Up	3.65714e-49	3.02654e-47
CL16297.Contig3_All	1057	4	34	0.1779	1.4766	3.05314	Up	4.85392e-07	6.63064e-06
CL11197.Contig3_All	366	4	34	0.5138	4.2645	3.0531	Up	4.85392e-07	6.63139e-06
CL3832.Contig1_All	797	4	34	0.236	1.9583	3.05274	Up	4.85392e-07	6.62989e-06
CL1790.Contig2_All	2463	4	34	0.0764	0.6337	3.05216	Up	4.85392e-07	6.62914e-06
CL17938.Contig4_All	1786	43	365	1.1319	9.3817	3.0511	Up	2.66098e-63	2.8247e-61
Unigene8853_All	1193	5	42	0.197	1.6161	3.03625	Up	2.15166e-08	3.4627e-07
CL16208.Contig1_All	1100	8	67	0.3419	2.7961	3.03177	Up	1.1497e-12	2.68615e-11
Unigene35201_All	867	8	67	0.4338	3.5475	3.0317	Up	1.1497e-12	2.68563e-11
CL14262.Contig1_All	1535	11	92	0.3369	2.7514	3.02977	Up	6.58586e-17	2.02359e-15
CL176.Contig1_All	1044	11	92	0.4954	4.0454	3.02962	Up	6.58586e-17	2.02411e-15
CL15429.Contig3_All	1184	6	50	0.2382	1.9386	3.02477	Up	9.69962e-10	1.79212e-08
Unigene31076_All	763	6	50	0.3697	3.0083	3.02452	Up	9.69962e-10	1.79239e-08
CL6330.Contig6_All	1359	3	25	0.1038	0.8445	3.02429	Up	2.0061e-05	0.000213478
CL12608.Contig5_All	1425	3	25	0.099	0.8054	3.02421	Up	2.0061e-05	0.000213459
Unigene1605_All	913	25	208	1.2874	10.4583	3.02212	Up	2.11194e-36	1.32375e-34
CL4953.Contig3_All	1040	33	274	1.4918	12.0945	3.01923	Up	1.97657e-47	1.57849e-45
Unigene950_All	1742	7	58	0.1889	1.5284	3.01633	Up	4.42514e-11	9.21521e-10
CL15226.Contig3_All	1133	14	116	0.5809	4.7	3.0163	Up	6.9202e-21	2.59203e-19
CL5374.Contig2_All	257	4	33	0.7317	5.8945	3.01005	Up	8.63884e-07	1.14228e-05
CL10205.Contig2_All	655	8	66	0.5742	4.6256	3.01002	Up	2.03698e-12	4.68138e-11
Unigene6040_All	787	8	66	0.4779	3.8498	3.01	Up	2.03698e-12	4.68227e-11
CL16166.Contig2_All	3438	16	132	0.2188	1.7625	3.00994	Up	1.55967e-23	6.47142e-22
Unigene36044_All	677	4	33	0.2778	2.2377	3.0099	Up	8.63884e-07	1.14241e-05
CL12667.Contig1_All	1611	8	66	0.2335	1.8807	3.00978	Up	2.03698e-12	4.68316e-11
CL3742.Contig3_All	1024	35	288	1.6069	12.9111	3.00626	Up	1.43797e-49	1.19987e-47
CL13078.Contig1_All	1377	22	181	0.7511	6.0341	3.00606	Up	1.05032e-31	5.73327e-30
CL8218.Contig5_All	726	18	148	1.1656	9.3582	3.00516	Up	3.54026e-26	1.62693e-24
CL15664.Contig2_All	3298	5	41	0.0713	0.5707	3.00076	Up	3.82062e-08	5.97521e-07
CL8185.Contig3_All	1402	11	90	0.3689	2.9469	2.9979	Up	2.06072e-16	6.14445e-15
Unigene36847_All	895	6	49	0.3152	2.5133	2.99524	Up	1.71954e-09	3.10354e-08
CL366.Contig5_All	1495	18	147	0.5661	4.5138	2.99521	Up	6.24864e-26	2.84561e-24
Unigene20138_All	540	346	2823	30.1241	239.986	2.99396	Up	0	0
CL15656.Contig2_All	1572	15	122	0.4486	3.5627	2.98947	Up	1.02339e-21	3.93437e-20
CL2251.Contig4_All	376	8	65	1.0003	7.9359	2.98796	Up	3.60356e-12	8.1272e-11
CL3487.Contig2_All	895	41	333	2.1537	17.0801	2.98743	Up	1.00986e-56	9.65986e-55
CL5880.Contig1_All	2103	37	300	0.8272	6.5486	2.98488	Up	3.24432e-51	2.79989e-49
Unigene11257_All	1645	10	81	0.2858	2.2604	2.9835	Up	7.77556e-15	2.12218e-13
CL10446.Contig4_All	406	10	81	1.158	9.1586	2.98349	Up	7.77556e-15	2.12266e-13
CL10681.Contig4_All	894	684	5536	35.9708	284.268	2.98235	Up	0	0
CL4353.Contig2_All	1139	32	258	1.3209	10.3984	2.97677	Up	3.82444e-44	2.85965e-42
Unigene27513_All	1141	43	346	1.7718	13.9207	2.97394	Up	1.2922e-58	1.27541e-56
CL2555.Contig3_All	2797	3	24	0.0504	0.3939	2.96633	Up	3.57074e-05	0.000362282
CL15829.Contig2_All	690	4	32	0.2725	2.129	2.96585	Up	1.5332e-06	1.95194e-05
CL9261.Contig4_All	400	4	32	0.4701	3.6725	2.96572	Up	1.5332e-06	1.95174e-05
Unigene13153_All	626	3	24	0.2253	1.76	2.96566	Up	3.57074e-05	0.000362373
CL5902.Contig7_All	722	7	56	0.4558	3.5606	2.96565	Up	1.385e-10	2.7615e-09
CL14198.Contig1_All	1146	22	176	0.9025	7.0501	2.96564	Up	1.78648e-30	9.4323e-29
Unigene12431_All	1526	13	104	0.4005	3.1286	2.96564	Up	1.42059e-18	4.77645e-17
Unigene13858_All	1772	3	24	0.0796	0.6218	2.96561	Up	3.57074e-05	0.000362434
Unigene36037_All	751	3	24	0.1878	1.467	2.9656	Up	3.57074e-05	0.000362403
CL2098.Contig4_All	379	4	32	0.4962	3.876	2.96557	Up	1.5332e-06	1.95236e-05
Unigene16150_All	684	3	24	0.2062	1.6107	2.96557	Up	3.57074e-05	0.000362342
CL6546.Contig1_All	1814	27	216	0.6998	5.4662	2.96552	Up	4.56054e-37	2.90519e-35
Unigene22533_All	335	6	48	0.8421	6.5776	2.9655	Up	3.04228e-09	5.36282e-08
CL16739.Contig2_All	661	10	80	0.7113	5.5559	2.96549	Up	1.37201e-14	3.67007e-13
Unigene28971_All	936	3	24	0.1507	1.1771	2.96549	Up	3.57074e-05	0.000362312
CL8056.Contig6_All	518	3	24	0.2723	2.1269	2.96548	Up	3.57074e-05	0.00036216
Unigene27703_All	1477	12	96	0.382	2.9837	2.96546	Up	3.01466e-17	9.43314e-16
Unigene2299_All	585	4	32	0.3215	2.5111	2.96543	Up	1.5332e-06	1.95215e-05
CL10277.Contig5_All	1268	6	48	0.2225	1.7378	2.96538	Up	3.04228e-09	5.3636e-08
CL9281.Contig1_All	510	3	24	0.2766	2.1603	2.96536	Up	3.57074e-05	0.000362251
Unigene20611_All	782	3	24	0.1804	1.4089	2.9653	Up	3.57074e-05	0.00036219
CL1862.Contig5_All	1363	3	24	0.1035	0.8083	2.96526	Up	3.57074e-05	0.000362221
CL5712.Contig8_All	1008	41	327	1.9123	14.8921	2.96117	Up	2.9978e-55	2.79459e-53
CL7561.Contig3_All	1722	33	263	0.901	7.0112	2.96006	Up	1.00495e-44	7.60369e-43
CL18099.Contig1_All	522	27	215	2.4318	18.9076	2.95887	Up	8.02144e-37	5.08577e-35
CL6867.Contig1_All	1229	24	190	0.9181	7.0969	2.95047	Up	1.2708e-32	7.16653e-31
Unigene35355_All	1172	11	87	0.4413	3.4077	2.94897	Up	1.13082e-15	3.24377e-14
Unigene20556_All	2965	138	1091	2.1882	16.8916	2.94849	Up	1.24888e-179	4.10326e-177
CL7687.Contig1_All	994	86	677	4.0677	31.266	2.94231	Up	6.60584e-112	1.18501e-109
Unigene50180_All	274	14	110	2.4022	18.4294	2.93958	Up	2.0792e-19	7.28461e-18
CL13672.Contig2_All	1626	19	149	0.5494	4.2066	2.93673	Up	8.87562e-26	4.01021e-24
Unigene28613_All	313	22	172	3.3045	25.2263	2.93242	Up	1.70519e-29	8.73237e-28
CL13805.Contig1_All	429	16	125	1.7535	13.3759	2.93133	Up	8.21336e-22	3.17171e-20
CL7045.Contig3_All	954	5	39	0.2464	1.8767	2.92912	Up	1.19607e-07	1.76102e-06
CL3419.Contig3_All	740	9	70	0.5718	4.3425	2.92494	Up	9.14296e-13	2.15279e-11
CL939.Contig1_All	1094	9	70	0.3868	2.9373	2.92483	Up	9.14296e-13	2.15237e-11
Unigene21374_All	2318	13	101	0.2637	2.0002	2.92317	Up	7.73414e-18	2.49698e-16
Unigene21671_All	1160	12	93	0.4864	3.6804	2.91965	Up	1.64181e-16	4.91964e-15
CL8731.Contig2_All	1219	4	31	0.1543	1.1674	2.91949	Up	2.71304e-06	3.3326e-05
CL6069.Contig1_All	1755	15	116	0.4018	3.0342	2.91677	Up	3.03814e-20	1.10477e-18
Unigene20129_All	462	612	4733	62.279	470.288	2.91673	Up	0	0
Unigene1118_All	702	11	85	0.7367	5.5584	2.91552	Up	3.49698e-15	9.76473e-14
CL8185.Contig9_All	1552	14	108	0.4241	3.1945	2.91311	Up	6.4146e-19	2.20022e-17
CL3151.Contig2_All	1889	10	77	0.2489	1.8712	2.91033	Up	7.47824e-14	1.90554e-12
Unigene18910_All	993	10	77	0.4735	3.5597	2.91032	Up	7.47824e-14	1.90514e-12
CL5223.Contig2_All	1457	29	223	0.9358	7.0261	2.90845	Up	1.67242e-37	1.07444e-35
CL14224.Contig3_All	1046	22	169	0.9888	7.4169	2.90707	Up	9.19822e-29	4.60704e-27
CL7850.Contig1_All	1130	44	338	1.8307	13.7312	2.90699	Up	5.07036e-56	4.79693e-54
CL8271.Contig1_All	900	3	23	0.1567	1.1732	2.90437	Up	6.33182e-05	0.000611525
Unigene1852_All	446	3	23	0.3162	2.3673	2.90433	Up	6.33182e-05	0.000611378
Unigene6640_All	670	3	23	0.2105	1.5759	2.90428	Up	6.33182e-05	0.000611427
CL5225.Contig2_All	794	12	92	0.7105	5.3191	2.90428	Up	2.88196e-16	8.52169e-15
CL5369.Contig8_All	281	3	23	0.5019	3.7574	2.90426	Up	6.33182e-05	0.000611329
Unigene8108_All	1195	6	46	0.2361	1.7671	2.90391	Up	9.46322e-09	1.58561e-07
CL14665.Contig1_All	1890	179	1372	4.4527	33.3244	2.90383	Up	6.1036e-222	2.61693e-219
Unigene10129_All	865	3	23	0.1631	1.2206	2.90376	Up	6.33182e-05	0.000611476
CL8799.Contig2_All	2368	8	61	0.1588	1.1825	2.89656	Up	3.47352e-11	7.28241e-10
CL13680.Contig12_All	727	5	38	0.3233	2.3995	2.89179	Up	2.1083e-07	3.0085e-06
Unigene12936_All	901	5	38	0.2609	1.9361	2.89158	Up	2.1083e-07	3.00815e-06
Unigene23368_All	655	5	38	0.3589	2.6632	2.89151	Up	2.1083e-07	3.00886e-06
Unigene6720_All	839	5	38	0.2802	2.0792	2.8915	Up	2.1083e-07	3.01028e-06
Unigene9135_All	548	5	38	0.429	3.1833	2.89147	Up	2.1083e-07	3.01063e-06
Unigene2655_All	989	5	38	0.2377	1.7638	2.89147	Up	2.1083e-07	3.00992e-06
CL5534.Contig1_All	479	5	38	0.4908	3.6418	2.89144	Up	2.1083e-07	3.00957e-06
CL2656.Contig8_All	1077	5	38	0.2183	1.6197	2.89134	Up	2.1083e-07	3.00921e-06
Unigene15497_All	1256	121	918	4.5293	33.5523	2.88905	Up	2.4652e-148	6.08291e-146
CL8700.Contig2_All	914	7	53	0.3601	2.6619	2.88599	Up	7.56462e-10	1.41451e-08
Unigene3187_All	1782	7	53	0.1847	1.3653	2.88596	Up	7.56462e-10	1.41429e-08
CL1681.Contig2_All	705	32	242	2.134	15.7578	2.88443	Up	3.0777e-40	2.11311e-38
CL1541.Contig2_All	769	107	809	6.5417	48.2938	2.8841	Up	1.05227e-130	2.27599e-128
CL12539.Contig1_All	1795	9	68	0.2357	1.7391	2.88332	Up	2.81992e-12	6.41126e-11
CL14774.Contig2_All	1867	50	377	1.2591	9.2697	2.88013	Up	1.01025e-61	1.0431e-59
CL11594.Contig1_All	743	40	301	2.5311	18.5972	2.87725	Up	1.50276e-49	1.25049e-47
CL8799.Contig1_All	2286	67	504	1.3779	10.121	2.87681	Up	7.28542e-82	9.63748e-80
CL9498.Contig2_All	940	33	248	1.6505	12.1114	2.87539	Up	4.53888e-41	3.17035e-39
CL7651.Contig2_All	1515	4	30	0.1241	0.909	2.87278	Up	4.7858e-06	5.65853e-05
CL7311.Contig3_All	584	8	60	0.644	4.7164	2.87255	Up	6.09458e-11	1.25491e-09
CL10305.Contig2_All	631	8	60	0.5961	4.3651	2.87239	Up	6.09458e-11	1.2547e-09
CL311.Contig1_All	750	10	75	0.6269	4.5906	2.87238	Up	2.30018e-13	5.6492e-12
CL16716.Contig1_All	1242	60	448	2.2712	16.5587	2.86606	Up	1.12264e-72	1.34259e-70
CL3150.Contig3_All	821	13	97	0.7444	5.4237	2.86513	Up	7.29662e-17	2.23573e-15
CL3742.Contig2_All	914	22	164	1.1316	8.237	2.86375	Up	1.50597e-27	7.26012e-26
CL11150.Contig1_All	1033	7	52	0.3186	2.3109	2.85864	Up	1.32701e-09	2.42366e-08
CL4775.Contig5_All	1682	228	1693	6.373	46.2062	2.85804	Up	5.71226e-269	3.24253e-266
CL4353.Contig3_All	920	33	245	1.6864	12.225	2.85782	Up	2.41344e-40	1.65986e-38
CL11184.Contig4_All	3300	22	163	0.3134	2.2675	2.85503	Up	2.62872e-27	1.25825e-25
Unigene14000_All	1502	20	148	0.626	4.5234	2.85317	Up	6.55686e-25	2.87446e-23
Unigene25597_All	308	5	37	0.7632	5.5147	2.85315	Up	3.70638e-07	5.13558e-06
CL936.Contig3_All	718	5	37	0.3274	2.3656	2.85308	Up	3.70638e-07	5.13441e-06
CL7831.Contig2_All	767	5	37	0.3065	2.2145	2.85302	Up	3.70638e-07	5.13499e-06
CL5758.Contig3_All	2545	23	170	0.4249	3.0664	2.85135	Up	2.20188e-28	1.08841e-26
CL3349.Contig3_All	1787	13	96	0.342	2.4661	2.85016	Up	1.27518e-16	3.85257e-15
Unigene42855_All	1090	8	59	0.3451	2.4848	2.84804	Up	1.06743e-10	2.15208e-09
CL12571.Contig1_All	1133	22	162	0.9129	6.5638	2.846	Up	4.58528e-27	2.1724e-25
CL8564.Contig2_All	762	14	103	0.8638	6.2051	2.84469	Up	1.05327e-17	3.37976e-16
Unigene15473_All	1336	14	103	0.4927	3.5392	2.84464	Up	1.05327e-17	3.38065e-16
Unigene6222_All	1432	17	125	0.5581	4.0072	2.844	Up	3.44468e-21	1.30316e-19
CL13759.Contig2_All	1156	6	44	0.244	1.7473	2.84017	Up	2.91736e-08	4.62539e-07
Unigene13603_All	854	6	44	0.3303	2.3652	2.84011	Up	2.91736e-08	4.62478e-07
Unigene9884_All	1237	18	132	0.6841	4.8986	2.84009	Up	2.86698e-22	1.12655e-20
Unigene26954_All	1276	9	66	0.3316	2.3744	2.84005	Up	8.64224e-12	1.89881e-10
CL2353.Contig2_All	432	6	44	0.653	4.6756	2.84	Up	2.91736e-08	4.62418e-07
Unigene11764_All	1715	16	117	0.4386	3.1318	2.83601	Up	7.23028e-20	2.58715e-18
Unigene30487_All	1235	119	870	4.5301	32.3386	2.83564	Up	5.44394e-138	1.23958e-135
CL16061.Contig2_All	1427	809	5912	26.6536	190.187	2.83501	Up	0	0
Unigene5684_All	1657	13	95	0.3689	2.6319	2.8348	Up	2.22594e-16	6.62239e-15
CL3722.Contig1_All	1019	24	175	1.1073	7.8838	2.83185	Up	5.6046e-29	2.82586e-27
CL10754.Contig2_All	1040	21	153	0.9493	6.7535	2.8307	Up	1.66508e-25	7.47849e-24
CL2770.Contig2_All	315	7	51	1.0448	7.4324	2.8306	Up	2.3231e-09	4.14646e-08
Unigene20148_All	348	1329	9680	179.547	1276.93	2.83024	Up	0	0
CL249.Contig13_All	3940	97	706	1.1575	8.2258	2.82914	Up	4.77218e-112	8.57347e-110
CL6157.Contig4_All	983	83	603	3.9697	28.16	2.82655	Up	7.33856e-96	1.11189e-93
CL17938.Contig1_All	1863	99	719	2.4984	17.7168	2.82604	Up	6.00266e-114	1.10467e-111
CL14774.Contig3_All	1798	59	428	1.5427	10.9276	2.82445	Up	1.79142e-68	2.04723e-66
CL1238.Contig2_All	1072	4	29	0.1754	1.2419	2.82383	Up	8.41428e-06	9.56519e-05
CL10796.Contig1_All	372	4	29	0.5055	3.5787	2.82365	Up	8.41428e-06	9.56699e-05
CL8309.Contig1_All	823	8	58	0.457	3.2352	2.82359	Up	1.86608e-10	3.67705e-09
CL13911.Contig2_All	597	4	29	0.315	2.2299	2.82356	Up	8.41428e-06	9.56969e-05
CL3507.Contig10_All	834	4	29	0.2255	1.5963	2.82353	Up	8.41428e-06	9.56789e-05
CL10617.Contig3_All	1289	4	29	0.1459	1.0328	2.82351	Up	8.41428e-06	9.56609e-05
Unigene24543_All	1096	8	58	0.3432	2.4293	2.82342	Up	1.86608e-10	3.67765e-09
CL5392.Contig3_All	2045	4	29	0.092	0.651	2.82295	Up	8.41428e-06	9.56879e-05
CL1131.Contig3_All	1956	162	1172	3.8938	27.5061	2.8205	Up	3.18126e-184	1.08349e-181
CL311.Contig2_All	870	30	217	1.6212	11.4501	2.82023	Up	1.96432e-35	1.19951e-33
CL1006.Contig8_All	694	13	94	0.8807	6.2178	2.81968	Up	3.88092e-16	1.13837e-14
Unigene18459_All	818	5	36	0.2874	2.0203	2.81344	Up	6.49758e-07	8.72221e-06
Unigene31943_All	1081	5	36	0.2175	1.5288	2.81331	Up	6.49758e-07	8.72124e-06
CL16807.Contig1_All	1773	45	323	1.1933	8.363	2.80906	Up	8.80164e-52	7.72831e-50
CL6886.Contig2_All	2455	177	1269	3.3896	23.729	2.80746	Up	2.38134e-198	8.832e-196
Unigene8110_All	1128	24	172	1.0003	6.9999	2.8069	Up	2.95068e-28	1.45379e-26
Unigene30739_All	1296	18	129	0.653	4.5693	2.80682	Up	1.51376e-21	5.7828e-20
CL9909.Contig2_All	1248	95	679	3.5788	24.9761	2.803	Up	8.62512e-107	1.45853e-104
Unigene27207_All	2378	21	150	0.4152	2.8957	2.80203	Up	8.76698e-25	3.82671e-23
CL5948.Contig8_All	936	8	57	0.4018	2.7956	2.79861	Up	3.25608e-10	6.29596e-09
Unigene2086_All	656	8	57	0.5733	3.9888	2.79859	Up	3.25608e-10	6.29495e-09
CL4050.Contig1_All	953	16	114	0.7893	5.4914	2.79853	Up	3.81538e-19	1.32408e-17
CL8596.Contig2_All	976	33	235	1.5896	11.0532	2.79773	Up	6.13744e-38	3.99175e-36
CL16906.Contig1_All	603	9	64	0.7017	4.8723	2.79568	Up	2.63092e-11	5.57189e-10
CL5846.Contig2_All	591	10	71	0.7955	5.5149	2.7934	Up	2.13774e-12	4.90548e-11
CL8230.Contig1_All	2346	24	170	0.481	3.3265	2.7899	Up	8.89918e-28	4.33165e-26
CL6633.Contig6_All	809	45	317	2.6151	17.9879	2.78209	Up	2.3978e-50	2.03734e-48
CL3419.Contig2_All	750	4	28	0.2507	1.7138	2.77316	Up	1.4742e-05	0.000160492
Unigene26287_All	652	5	35	0.3605	2.4643	2.77311	Up	1.13574e-06	1.47308e-05
Unigene655_All	1215	11	77	0.4256	2.9093	2.7731	Up	3.03336e-13	7.37497e-12
Unigene19406_All	930	8	56	0.4044	2.7642	2.77301	Up	5.6703e-10	1.07273e-08
Unigene31539_All	1083	10	70	0.4341	2.9671	2.77295	Up	3.71788e-12	8.37878e-11
CL11594.Contig3_All	557	10	70	0.8441	5.7692	2.77289	Up	3.71788e-12	8.38034e-11
Unigene9236_All	586	6	42	0.4814	3.2902	2.77287	Up	8.90708e-08	1.33218e-06
CL4597.Contig1_All	443	6	42	0.6368	4.3523	2.77287	Up	8.90708e-08	1.33202e-06
CL11160.Contig1_All	1106	10	70	0.4251	2.9054	2.77286	Up	3.71788e-12	8.37722e-11
CL6617.Contig2_All	557	9	63	0.7597	5.1922	2.77284	Up	4.5783e-11	9.51776e-10
Unigene12475_All	532	5	35	0.4419	3.0201	2.7728	Up	1.13574e-06	1.47292e-05
CL4408.Contig1_All	945	9	63	0.4478	3.0604	2.77279	Up	4.5783e-11	9.5194e-10
Unigene32775_All	797	4	28	0.236	1.6128	2.77271	Up	1.4742e-05	0.000160506
CL12580.Contig2_All	906	4	28	0.2076	1.4187	2.77269	Up	1.4742e-05	0.000160521
CL14224.Contig2_All	1073	162	1132	7.0982	48.4302	2.77038	Up	1.14071e-174	3.56384e-172
Unigene15029_All	1022	35	244	1.6101	10.9599	2.76701	Up	6.80824e-39	4.54539e-37
CL17621.Contig2_All	2299	24	167	0.4908	3.3346	2.76431	Up	4.6365e-27	2.19581e-25
CL3066.Contig1_All	2041	21	146	0.4837	3.2838	2.76318	Up	7.94186e-24	3.34111e-22
Unigene14221_All	1365	33	229	1.1366	7.7014	2.7604	Up	1.66204e-36	1.045e-34
Unigene21057_All	1856	16	111	0.4053	2.7455	2.76001	Up	1.99482e-18	6.66085e-17
CL1766.Contig2_All	486	15	104	1.4511	9.8235	2.75909	Up	2.41008e-17	7.57074e-16
CL7408.Contig4_All	1047	10	69	0.449	3.0253	2.75229	Up	6.45538e-12	1.43002e-10
Unigene27118_All	403	9	62	1.05	7.0625	2.74979	Up	7.95264e-11	1.62066e-09
CL6633.Contig1_All	901	35	241	1.8263	12.279	2.7492	Up	3.52316e-38	2.31762e-36
CL5382.Contig2_All	1129	24	165	0.9994	6.709	2.74696	Up	1.38838e-26	6.47134e-25
Unigene21404_All	1563	30	206	0.9024	6.0503	2.74517	Up	8.35566e-33	4.74303e-31
CL12460.Contig2_All	995	15	103	0.7088	4.7521	2.74511	Up	4.17446e-17	1.2995e-15
CL946.Contig1_All	1605	321	2201	9.4029	62.9527	2.74309	Up	0	0
CL8700.Contig3_All	795	7	48	0.414	2.7717	2.74307	Up	1.23015e-08	2.03218e-07
CL7720.Contig2_All	1230	7	48	0.2676	1.7915	2.74302	Up	1.23015e-08	2.03246e-07
CL1510.Contig1_All	645	6	41	0.4373	2.9181	2.73833	Up	1.55032e-07	2.25458e-06
Unigene6300_All	626	6	41	0.4506	3.0066	2.73821	Up	1.55032e-07	2.25404e-06
Unigene27511_All	1266	24	164	0.8913	5.9467	2.73811	Up	2.39986e-26	1.11003e-24
Unigene23789_All	495	6	41	0.5699	3.8023	2.73809	Up	1.55032e-07	2.25377e-06
Unigene2918_All	804	6	41	0.3509	2.341	2.73799	Up	1.55032e-07	2.25485e-06
Unigene30884_All	1279	6	41	0.2206	1.4716	2.73788	Up	1.55032e-07	2.25431e-06
CL12812.Contig2_All	1861	261	1783	6.5937	43.9819	2.73775	Up	1.41682e-270	8.0804e-268
Unigene20558_All	2923	105	717	1.6889	11.2606	2.73713	Up	7.0095e-110	1.22472e-107
CL17246.Contig3_All	939	22	150	1.1015	7.3332	2.73497	Up	3.4325e-24	1.46753e-22
Unigene8115_All	1312	16	109	0.5733	3.8138	2.73387	Up	5.97696e-18	1.94578e-16
Unigene634_All	1354	16	109	0.5556	3.6955	2.73365	Up	5.97696e-18	1.94526e-16
Unigene6165_All	1175	53	361	2.1207	14.1039	2.73348	Up	4.47106e-56	4.24323e-54
CL10277.Contig4_All	985	52	354	2.482	16.4982	2.73273	Up	5.28228e-55	4.90907e-53
CL6483.Contig2_All	1868	5	34	0.1258	0.8355	2.73151	Up	1.97912e-06	2.48202e-05
CL12236.Contig2_All	2563	5	34	0.0917	0.609	2.73145	Up	1.97912e-06	2.48125e-05
CL16659.Contig1_All	1366	5	34	0.1721	1.1426	2.731	Up	1.97912e-06	2.48099e-05
CL12461.Contig2_All	962	5	34	0.2444	1.6225	2.7309	Up	1.97912e-06	2.4815e-05
CL5532.Contig2_All	1079	5	34	0.2179	1.4465	2.73083	Up	1.97912e-06	2.48176e-05
CL13704.Contig2_All	1128	38	258	1.5838	10.4998	2.7289	Up	1.87522e-40	1.2956e-38
CL6605.Contig4_All	1519	19	129	0.5881	3.8985	2.72879	Up	5.91778e-21	2.22138e-19
CL5712.Contig4_All	1489	71	482	2.2418	14.8601	2.72871	Up	3.48024e-74	4.22055e-72
CL8949.Contig1_All	1653	9	61	0.256	1.6941	2.7263	Up	1.37881e-10	2.75007e-09
CL6069.Contig2_All	1945	13	88	0.3142	2.077	2.72475	Up	1.06164e-14	2.86967e-13
CL8029.Contig4_All	1049	156	1056	6.9917	46.2123	2.72456	Up	3.43516e-160	9.48261e-158
Unigene11450_All	1588	4	27	0.1184	0.7805	2.72073	Up	2.57322e-05	0.000268233
Unigene21610_All	527	4	27	0.3568	2.3519	2.72064	Up	2.57322e-05	0.000268256
CL15056.Contig1_All	736	24	162	1.5331	10.1043	2.72045	Up	7.15412e-26	3.24574e-24
CL6617.Contig3_All	288	4	27	0.653	4.3037	2.72042	Up	2.57322e-05	0.000268279
Unigene9232_All	822	4	27	0.2288	1.5079	2.72038	Up	2.57322e-05	0.000268209
CL17159.Contig5_All	659	4	27	0.2854	1.8808	2.72029	Up	2.57322e-05	0.000268348
Unigene36049_All	628	4	27	0.2995	1.9737	2.72027	Up	2.57322e-05	0.000268302
CL7500.Contig13_All	1376	4	27	0.1367	0.9008	2.72019	Up	2.57322e-05	0.000268186
Unigene17610_All	1573	4	27	0.1196	0.788	2.71998	Up	2.57322e-05	0.000268325
CL14224.Contig4_All	996	115	774	5.4284	35.6739	2.71627	Up	1.64492e-117	3.15189e-115
CL3523.Contig2_All	2586	14	94	0.2545	1.6687	2.71299	Up	1.51112e-15	4.30912e-14
CL1006.Contig1_All	611	7	47	0.5386	3.5312	2.71287	Up	2.13424e-08	3.43696e-07
Unigene25810_All	943	7	47	0.349	2.288	2.71279	Up	2.13424e-08	3.43604e-07
CL15056.Contig2_All	747	7	47	0.4406	2.8883	2.71268	Up	2.13424e-08	3.4365e-07
CL4408.Contig2_All	1645	7	47	0.2001	1.3116	2.71253	Up	2.13424e-08	3.43741e-07
Unigene15246_All	365	60	402	7.7284	50.5595	2.70974	Up	1.08831e-61	1.12274e-59
Unigene24370_All	1962	26	174	0.623	4.0712	2.70815	Up	1.49271e-27	7.19907e-26
CL9222.Contig1_All	1680	16	107	0.4478	2.9238	2.70692	Up	1.78288e-17	5.63861e-16
CL3574.Contig1_All	767	44	294	2.6971	17.5963	2.70579	Up	1.77858e-45	1.36276e-43
CL15731.Contig1_All	923	31	207	1.579	10.2953	2.7049	Up	1.85154e-32	1.03978e-30
CL12295.Contig2_All	1275	49	327	1.8068	11.7735	2.70403	Up	2.2801e-50	1.93869e-48
Unigene24648_All	789	6	40	0.3575	2.3273	2.70264	Up	2.69104e-07	3.7997e-06
CL16917.Contig1_All	392	6	40	0.7196	4.6843	2.70257	Up	2.69104e-07	3.80059e-06
Unigene16434_All	606	6	40	0.4655	3.0301	2.70251	Up	2.69104e-07	3.79926e-06
Unigene6885_All	534	6	40	0.5283	3.4387	2.70243	Up	2.69104e-07	3.80014e-06
Unigene6342_All	1547	156	1038	4.741	30.8018	2.69975	Up	6.00898e-156	1.57942e-153
CL12387.Contig1_All	566	36	239	2.9903	19.3843	2.69653	Up	4.00194e-37	2.55473e-35
CL17948.Contig2_All	1535	22	146	0.6738	4.3663	2.69602	Up	3.03828e-23	1.24231e-21
Unigene15120_All	1570	11	73	0.3294	2.1345	2.69599	Up	2.72726e-12	6.2111e-11
CL6401.Contig1_All	2868	241	1597	3.9507	25.562	2.69382	Up	2.38802e-238	1.13674e-235
CL12839.Contig1_All	2559	99	655	1.8189	11.7501	2.69153	Up	9.66142e-99	1.52102e-96
CL17242.Contig2_All	781	13	86	0.7826	5.055	2.69136	Up	3.16478e-14	8.26095e-13
CL17159.Contig6_All	1171	513	3387	20.5965	132.779	2.68855	Up	0	0
Unigene31420_All	444	5	33	0.5294	3.4119	2.68815	Up	3.43762e-06	4.15677e-05
Unigene12842_All	622	5	33	0.3779	2.4355	2.68814	Up	3.43762e-06	4.15719e-05
Unigene18389_All	1189	15	99	0.5931	3.8223	2.68809	Up	3.71282e-16	1.09065e-14
Unigene13990_All	470	5	33	0.5002	3.2232	2.68792	Up	3.43762e-06	4.15594e-05
Unigene6605_All	1312	5	33	0.1792	1.1546	2.68775	Up	3.43762e-06	4.15636e-05
Unigene11289_All	1434	21	138	0.6885	4.4177	2.68177	Up	6.25872e-22	2.43165e-20
CL11382.Contig2_All	1332	181	1189	6.3886	40.9777	2.68127	Up	4.87626e-177	1.57641e-174
CL10681.Contig3_All	826	495	3251	28.1746	180.679	2.68096	Up	0	0
CL4176.Contig5_All	453	9	59	0.9341	5.9789	2.67823	Up	4.12056e-10	7.87931e-09
CL6546.Contig3_All	1783	44	288	1.1602	7.415	2.67607	Up	4.58968e-44	3.42337e-42
CL10312.Contig1_All	837	83	542	4.6621	29.7265	2.6727	Up	2.19502e-81	2.87536e-79
CL10089.Contig1_All	1607	17	111	0.4974	3.1709	2.67241	Up	7.55702e-18	2.44306e-16
CL1122.Contig12_All	1771	40	261	1.0619	6.7654	2.67153	Up	5.23082e-40	3.57315e-38
CL13626.Contig1_All	1474	52	339	1.6586	10.5578	2.67027	Up	1.80727e-51	1.57317e-49
Unigene24967_All	2083	59	384	1.3317	8.4627	2.66785	Up	4.94248e-58	4.82313e-56
CL9020.Contig1_All	1029	6	39	0.2741	1.7399	2.66623	Up	4.65776e-07	6.37348e-06
Unigene29713_All	2125	4	26	0.0885	0.5617	2.66605	Up	4.47386e-05	0.00044583
CL12642.Contig1_All	1068	48	312	2.113	13.4107	2.66602	Up	2.04324e-47	1.63065e-45
Unigene12767_All	1157	14	91	0.5689	3.6106	2.66599	Up	7.7343e-15	2.11188e-13
CL12510.Contig2_All	707	4	26	0.266	1.6882	2.66599	Up	4.47386e-05	0.000445756
CL4115.Contig5_All	505	12	78	1.1172	7.0904	2.66598	Up	6.63402e-13	1.5805e-11
Unigene31335_All	1215	4	26	0.1548	0.9824	2.66591	Up	4.47386e-05	0.000445793
Unigene20166_All	1653	4	26	0.1138	0.7221	2.6657	Up	4.47386e-05	0.00044572
CL4109.Contig3_All	1674	51	331	1.4323	9.077	2.66388	Up	3.65634e-50	3.10232e-48
CL4096.Contig3_All	1862	979	6353	24.7192	156.628	2.66364	Up	0	0
Unigene9770_All	428	21	136	2.3068	14.587	2.66072	Up	1.84815e-21	7.04688e-20
CL2833.Contig9_All	1839	19	123	0.4857	3.0704	2.66029	Up	1.54516e-19	5.45308e-18
Unigene18686_All	1016	34	220	1.5733	9.9403	2.6595	Up	8.41252e-34	4.89716e-32
Unigene8637_All	740	28	181	1.7789	11.2284	2.6581	Up	4.66976e-28	2.28588e-26
CL2124.Contig3_All	1076	26	168	1.136	7.1675	2.65751	Up	3.8555e-26	1.76777e-24
Unigene8783_All	1584	11	71	0.3265	2.0577	2.65588	Up	8.09766e-12	1.78272e-10
CL779.Contig3_All	840	11	71	0.6157	3.8802	2.65583	Up	8.09766e-12	1.7824e-10
CL7591.Contig2_All	625	11	71	0.8275	5.2149	2.65581	Up	8.09766e-12	1.78207e-10
CL3480.Contig6_All	527	9	58	0.8029	5.0523	2.65365	Up	7.10168e-10	1.33207e-08
CL6605.Contig5_All	1465	27	174	0.8665	5.4523	2.65359	Up	5.55488e-27	2.62458e-25
CL3416.Contig2_All	1202	16	103	0.6258	3.9337	2.65211	Up	1.56429e-16	4.69436e-15
CL17294.Contig2_All	474	39	251	3.8683	24.3089	2.65171	Up	3.12018e-38	2.05476e-36
CL13110.Contig1_All	909	7	45	0.362	2.2726	2.65028	Up	6.37628e-08	9.69862e-07
CL2655.Contig2_All	741	7	45	0.4441	2.7878	2.65017	Up	6.37628e-08	9.6974e-07
Unigene1149_All	1557	7	45	0.2114	1.3268	2.6499	Up	6.37628e-08	9.69984e-07
Unigene18035_All	1780	22	141	0.5811	3.6364	2.64565	Up	4.54916e-22	1.77716e-20
CL11070.Contig1_All	557	5	32	0.422	2.6373	2.64375	Up	5.95068e-06	6.93346e-05
Unigene6484_All	419	5	32	0.561	3.5059	2.64371	Up	5.95068e-06	6.93413e-05
CL1006.Contig12_All	553	5	32	0.4251	2.6564	2.6436	Up	5.95068e-06	6.93279e-05
CL6605.Contig2_All	1652	10	64	0.2846	1.7784	2.64357	Up	9.92218e-11	2.00513e-09
Unigene31772_All	429	5	32	0.548	3.4242	2.64352	Up	5.95068e-06	6.93212e-05
CL10512.Contig5_All	1576	23	147	0.6861	4.2818	2.64173	Up	6.5303e-23	2.62838e-21
Unigene5601_All	1601	8	51	0.2349	1.4623	2.63812	Up	8.79766e-09	1.47984e-07
CL5902.Contig6_All	1104	8	51	0.3407	2.1207	2.63797	Up	8.79766e-09	1.47943e-07
CL1013.Contig1_All	1935	8	51	0.1944	1.2099	2.63779	Up	8.79766e-09	1.47963e-07
CL11813.Contig1_All	2402	25	159	0.4893	3.0387	2.63466	Up	1.3484e-24	5.84974e-23
CL6969.Contig3_All	1619	50	318	1.452	9.0167	2.63456	Up	1.08643e-47	8.7339e-46
Unigene35655_All	909	6	38	0.3103	1.9191	2.62869	Up	8.0378e-07	1.06701e-05
Unigene18874_All	717	6	38	0.3934	2.433	2.62867	Up	8.0378e-07	1.06689e-05
CL14803.Contig1_All	1220	9	57	0.3468	2.1448	2.62867	Up	1.22139e-09	2.23852e-08
Unigene30412_All	484	6	38	0.5828	3.6042	2.62861	Up	8.0378e-07	1.06678e-05
CL2024.Contig2_All	889	6	38	0.3173	1.9622	2.62855	Up	8.0378e-07	1.06666e-05
CL9603.Contig2_All	3284	6	38	0.0859	0.5312	2.62853	Up	8.0378e-07	1.06713e-05
Unigene8914_All	1738	9	57	0.2435	1.5055	2.62825	Up	1.22139e-09	2.23818e-08
Unigene30447_All	575	25	158	2.0441	12.6142	2.62551	Up	2.30754e-24	9.9359e-23
CL4018.Contig1_All	473	23	145	2.2861	14.0727	2.62194	Up	1.91387e-22	7.57207e-21
CL469.Contig1_All	764	10	63	0.6154	3.7854	2.62085	Up	1.70415e-10	3.37338e-09
Unigene22519_All	684	7	44	0.4811	2.953	2.61777	Up	1.0978e-07	1.62403e-06
CL10923.Contig1_All	574	7	44	0.5733	3.5189	2.61776	Up	1.0978e-07	1.62384e-06
Unigene13647_All	740	7	44	0.4447	2.7295	2.61773	Up	1.0978e-07	1.62324e-06
CL14863.Contig1_All	839	7	44	0.3923	2.4075	2.61751	Up	1.0978e-07	1.62364e-06
CL14489.Contig2_All	1552	7	44	0.2121	1.3015	2.61736	Up	1.0978e-07	1.62344e-06
CL1879.Contig2_All	2539	252	1581	4.6663	28.585	2.61491	Up	2.15084e-228	9.59608e-226
CL13372.Contig3_All	779	23	144	1.3881	8.4858	2.61194	Up	3.272e-22	1.28362e-20
Unigene25316_All	684	4	25	0.2749	1.6779	2.60968	Up	7.7456e-05	0.000732732
CL12478.Contig1_All	484	4	25	0.3885	2.3712	2.60963	Up	7.7456e-05	0.000732962
CL8474.Contig5_All	510	4	25	0.3687	2.2503	2.6096	Up	7.7456e-05	0.000732847
CL7687.Contig4_All	1011	4	25	0.186	1.1352	2.60957	Up	7.7456e-05	0.000733019
CL1973.Contig6_All	570	4	25	0.3299	2.0134	2.60953	Up	7.7456e-05	0.000733249
CL4539.Contig4_All	551	8	50	0.6826	4.1657	2.60945	Up	1.51196e-08	2.4774e-07
CL9648.Contig3_All	980	4	25	0.1919	1.1711	2.60944	Up	7.7456e-05	0.00073279
CL821.Contig4_All	720	4	25	0.2612	1.594	2.60942	Up	7.7456e-05	0.000732904
Unigene35393_All	803	8	50	0.4684	2.8584	2.60939	Up	1.51196e-08	2.47707e-07
CL3872.Contig2_All	380	4	25	0.4949	3.0201	2.60939	Up	7.7456e-05	0.000733076
Unigene12051_All	858	4	25	0.2192	1.3376	2.60933	Up	7.7456e-05	0.000733134
CL17973.Contig3_All	1896	4	25	0.0992	0.6053	2.60924	Up	7.7456e-05	0.000733191
CL7445.Contig1_All	775	54	337	3.2759	19.9617	2.60727	Up	6.99652e-50	5.89091e-48
CL5369.Contig7_All	367	13	81	1.6654	10.1318	2.60495	Up	4.73308e-13	1.13726e-11
CL12369.Contig1_All	1588	13	81	0.3849	2.3416	2.60494	Up	4.73308e-13	1.13703e-11
CL13017.Contig5_All	980	205	1275	9.8347	59.7246	2.60237	Up	1.41627e-183	4.7832e-181
Unigene29854_All	1559	51	317	1.538	9.3343	2.60149	Up	6.66452e-47	5.28043e-45
Unigene10059_All	1110	14	87	0.593	3.598	2.60109	Up	6.69084e-14	1.70886e-12
CL10539.Contig3_All	1640	34	211	0.9747	5.9062	2.5992	Up	1.05249e-31	5.74255e-30
CL1104.Contig1_All	1207	93	577	3.6225	21.9451	2.59884	Up	6.25472e-84	8.5355e-82
Unigene28708_All	443	5	31	0.5306	3.2124	2.59795	Up	1.0264e-05	0.000115185
Unigene32528_All	493	5	31	0.4768	2.8866	2.59792	Up	1.0264e-05	0.000115196
CL13982.Contig2_All	622	16	99	1.2094	7.3066	2.59491	Up	1.34562e-15	3.84534e-14
CL13741.Contig1_All	1120	11	68	0.4617	2.7872	2.59379	Up	4.08854e-11	8.526e-10
CL724.Contig5_All	2223	380	2349	8.0367	48.508	2.59355	Up	0	0
Unigene14915_All	1364	233	1440	8.0311	48.4638	2.59324	Up	2.81888e-206	1.09944e-203
CL724.Contig7_All	2234	328	2027	6.9028	41.6524	2.59315	Up	1.47312e-289	8.95034e-287
CL9141.Contig3_All	653	28	173	2.0159	12.1619	2.59287	Up	3.41696e-26	1.57206e-24
CL925.Contig2_All	1117	23	142	0.9681	5.8359	2.59173	Up	9.537e-22	3.67346e-20
CL4953.Contig1_All	1139	35	216	1.4447	8.7056	2.59117	Up	2.58958e-32	1.44353e-30
CL6746.Contig1_All	682	65	401	4.4809	26.9917	2.59066	Up	1.22733e-58	1.21237e-56
CL10766.Contig3_All	464	6	37	0.6079	3.6606	2.59017	Up	1.38275e-06	1.76916e-05
Unigene19325_All	343	6	37	0.8224	4.952	2.5901	Up	1.38275e-06	1.76972e-05
CL4970.Contig2_All	328	6	37	0.86	5.1784	2.5901	Up	1.38275e-06	1.76953e-05
Unigene12995_All	361	6	37	0.7814	4.705	2.59006	Up	1.38275e-06	1.76935e-05
Unigene21166_All	1026	12	74	0.5499	3.311	2.59003	Up	5.7433e-12	1.27649e-10
Unigene21994_All	801	19	117	1.1152	6.7054	2.58802	Up	3.88626e-18	1.27789e-16
CL8029.Contig3_All	1034	155	954	7.0476	42.3543	2.5873	Up	6.15498e-137	1.39361e-134
CL17294.Contig1_All	470	13	80	1.3004	7.8138	2.58707	Up	8.09256e-13	1.91479e-11
CL13447.Contig2_All	704	7	43	0.4675	2.8039	2.5844	Up	1.88485e-07	2.71076e-06
CL5902.Contig5_All	914	7	43	0.3601	2.1597	2.58436	Up	1.88485e-07	2.71044e-06
Unigene1380_All	806	29	178	1.6916	10.1381	2.58333	Up	8.37892e-27	3.92971e-25
CL4899.Contig3_All	951	8	49	0.3955	2.3653	2.58027	Up	2.59202e-08	4.12961e-07
Unigene11611_All	1328	128	783	4.5315	27.0666	2.57845	Up	2.75476e-112	4.96382e-110
CL1879.Contig3_All	1884	18	110	0.4492	2.6803	2.57696	Up	4.64796e-17	1.44207e-15
CL15805.Contig3_All	804	19	116	1.111	6.6233	2.57569	Up	6.62632e-18	2.15196e-16
Unigene24400_All	1550	20	122	0.6066	3.6132	2.57446	Up	9.45884e-19	3.2116e-17
CL9993.Contig2_All	923	20	122	1.0187	6.0677	2.57442	Up	9.45884e-19	3.21069e-17
Unigene15515_All	923	10	61	0.5094	3.0339	2.5743	Up	4.9968e-10	9.50225e-09
CL2191.Contig4_All	3039	116	707	1.7946	10.6797	2.57314	Up	2.50206e-101	4.04979e-99
CL6280.Contig9_All	924	11	67	0.5597	3.3287	2.57223	Up	6.98812e-11	1.42989e-09
Unigene787_All	1732	46	280	1.2487	7.4213	2.57125	Up	4.32608e-41	3.0252e-39
CL11382.Contig1_All	1194	93	566	3.6619	21.7611	2.57109	Up	2.15774e-81	2.82959e-79
CL10979.Contig1_All	803	298	1811	17.4475	103.531	2.56898	Up	3.31592e-256	1.72069e-253
CL4978.Contig3_All	1371	13	79	0.4458	2.6452	2.56891	Up	1.38141e-12	3.20643e-11
Unigene14152_All	1410	47	285	1.5672	9.2789	2.56576	Up	1.06447e-41	7.553e-40
CL8853.Contig3_All	575	18	109	1.4718	8.7022	2.5638	Up	7.91814e-17	2.42126e-15
CL14551.Contig4_All	388	55	333	6.6644	39.3987	2.5636	Up	2.0691e-48	1.68806e-46
CL1703.Contig1_All	1078	185	1120	8.0684	47.6945	2.56347	Up	8.56666e-159	2.33283e-156
CL8709.Contig2_All	1902	74	448	1.8292	10.8128	2.56346	Up	1.45387e-64	1.56811e-62
Unigene5808_All	2059	114	689	2.603	15.3615	2.56107	Up	2.82394e-98	4.40564e-96
CL10511.Contig3_All	1329	27	163	0.9551	5.6303	2.55949	Up	1.99651e-24	8.6089e-23
CL3127.Contig5_All	797	216	1304	12.7417	75.1084	2.55942	Up	3.03318e-184	1.03598e-181
CL2786.Contig2_All	1080	198	1194	8.6193	50.7516	2.55781	Up	9.6549e-169	2.86116e-166
Unigene21320_All	1769	186	1120	4.9433	29.0643	2.5557	Up	2.9772e-158	7.98154e-156
CL8450.Contig2_All	785	59	355	3.5336	20.76	2.5546	Up	2.63892e-51	2.28068e-49
CL6483.Contig1_All	1990	5	30	0.1181	0.6921	2.55097	Up	1.7637e-05	0.000189787
CL10252.Contig3_All	1121	6	36	0.2516	1.4742	2.55073	Up	2.371e-06	2.93813e-05
CL9462.Contig1_All	503	5	30	0.4673	2.7379	2.55065	Up	1.7637e-05	0.000189804
CL6953.Contig2_All	2249	28	168	0.5853	3.4292	2.55062	Up	4.87496e-25	2.15117e-23
Unigene35158_All	345	10	60	1.3627	7.9837	2.55059	Up	8.52948e-10	1.58537e-08
CL11663.Contig1_All	1048	5	30	0.2243	1.3141	2.55057	Up	1.7637e-05	0.000189821
Unigene23195_All	656	9	54	0.645	3.7788	2.55056	Up	6.13116e-09	1.04719e-07
CL7637.Contig7_All	585	16	96	1.2859	7.5333	2.5505	Up	6.66588e-15	1.83172e-13
CL6386.Contig3_All	790	7	42	0.4166	2.4406	2.5505	Up	3.2269e-07	4.50477e-06
Unigene21503_All	1560	13	78	0.3918	2.2953	2.55049	Up	2.35414e-12	5.38366e-11
Unigene17669_All	1301	5	30	0.1807	1.0586	2.55049	Up	1.7637e-05	0.00018977
CL7613.Contig3_All	1484	11	66	0.3485	2.0416	2.55047	Up	1.19209e-10	2.39107e-09
CL7148.Contig1_All	935	7	42	0.352	2.0621	2.55047	Up	3.2269e-07	4.50425e-06
Unigene682_All	1541	19	114	0.5797	3.396	2.55046	Up	1.91973e-17	6.05876e-16
CL6401.Contig3_All	967	9	54	0.4376	2.5635	2.55043	Up	6.13116e-09	1.04734e-07
CL5715.Contig1_All	1126	132	788	5.5115	32.126	2.54322	Up	2.86372e-111	5.09936e-109
CL11553.Contig4_All	1194	154	919	6.0638	35.333	2.54272	Up	1.94108e-129	4.16861e-127
CL6402.Contig1_All	1453	25	149	0.8089	4.7075	2.54093	Up	2.79452e-22	1.09951e-20
CL17084.Contig5_All	1076	319	1900	13.9383	81.0608	2.53995	Up	2.85994e-265	1.5935e-262
CL5115.Contig2_All	1097	15	89	0.6429	3.7244	2.53434	Up	7.99398e-14	2.03139e-12
Unigene22666_All	1476	25	148	0.7963	4.603	2.53119	Up	4.74044e-22	1.85068e-20
Unigene11839_All	3069	35	207	0.5362	3.0963	2.5297	Up	3.05532e-30	1.60266e-28
CL14136.Contig1_All	972	89	526	4.3048	24.8421	2.52877	Up	2.24114e-74	2.7206e-72
CL11502.Contig5_All	932	11	65	0.5549	3.2016	2.52849	Up	2.02954e-10	3.99004e-09
Unigene3589_All	1921	32	189	0.7832	4.5165	2.52775	Up	1.01999e-27	4.9548e-26
Unigene24646_All	2060	80	472	1.8258	10.5183	2.5263	Up	7.69222e-67	8.564e-65
CL12533.Contig2_All	474	9	53	0.8927	5.1329	2.52353	Up	1.0449e-08	1.74353e-07
CL15157.Contig1_All	599	41	241	3.218	18.4697	2.52092	Up	7.93956e-35	4.73819e-33
Unigene2810_All	785	8	47	0.4791	2.7485	2.52025	Up	7.5588e-08	1.14112e-06
Unigene26829_All	1384	16	94	0.5435	3.1179	2.52022	Up	1.92362e-14	5.096e-13
CL3981.Contig1_All	646	8	47	0.5822	3.3399	2.52022	Up	7.5588e-08	1.14083e-06
Unigene36228_All	497	8	47	0.7568	4.3412	2.52011	Up	7.5588e-08	1.14069e-06
CL17520.Contig3_All	1277	16	94	0.5891	3.3791	2.52005	Up	1.92362e-14	5.09712e-13
Unigene31241_All	1438	8	47	0.2616	1.5004	2.51991	Up	7.5588e-08	1.14097e-06
Unigene14954_All	1688	45	264	1.2533	7.1796	2.51817	Up	5.87652e-38	3.83235e-36
CL14802.Contig2_All	676	130	762	9.0413	51.7461	2.51685	Up	2.11688e-106	3.55977e-104
Unigene31696_All	589	7	41	0.5587	3.1955	2.5159	Up	5.508e-07	7.47683e-06
CL14700.Contig1_All	1258	28	164	1.0464	5.9846	2.51582	Up	4.0275e-24	1.71585e-22
Unigene8685_All	1593	35	205	1.033	5.9076	2.51573	Up	8.75552e-30	4.52785e-28
CL6372.Contig1_All	958	14	82	0.6871	3.9293	2.51568	Up	9.59612e-13	2.25554e-11
CL11764.Contig2_All	1679	20	117	0.56	3.1989	2.51408	Up	1.33829e-17	4.26378e-16
CL5382.Contig3_All	994	32	187	1.5135	8.6362	2.51251	Up	2.92254e-27	1.39612e-25
CL11421.Contig2_All	330	25	146	3.5617	20.3099	2.51155	Up	1.36023e-21	5.20616e-20
CL11212.Contig2_All	563	6	35	0.501	2.8538	2.51	Up	4.05166e-06	4.84596e-05
CL16697.Contig1_All	514	6	35	0.5488	3.1259	2.50992	Up	4.05166e-06	4.84548e-05
CL7043.Contig1_All	1414	6	35	0.1995	1.1363	2.50988	Up	4.05166e-06	4.84644e-05
CL8709.Contig1_All	1885	72	420	1.7958	10.2284	2.50988	Up	3.14926e-59	3.14947e-57
CL68.Contig1_All	633	77	449	5.719	32.5621	2.50936	Up	3.45136e-63	3.65089e-61
Unigene21918_All	1198	525	3056	20.6032	117.103	2.50683	Up	0	0
CL13314.Contig1_All	1371	974	5668	33.4005	189.785	2.50642	Up	0	0
CL5192.Contig1_All	2500	187	1088	3.5167	19.9783	2.50614	Up	2.04906e-150	5.13999e-148
CL7025.Contig2_All	1450	11	64	0.3567	2.0262	2.50599	Up	3.44822e-10	6.6441e-09
CL3407.Contig1_All	1321	38	221	1.3524	7.68	2.50558	Up	7.52568e-32	4.13222e-30
CL3982.Contig1_All	1001	5	29	0.2348	1.3299	2.50181	Up	3.01852e-05	0.000310819
Unigene17431_All	647	5	29	0.3633	2.0576	2.50173	Up	3.01852e-05	0.000310951
Unigene7161_All	544	5	29	0.4321	2.4472	2.50169	Up	3.01852e-05	0.000310872
CL9635.Contig4_All	1135	5	29	0.2071	1.1729	2.50168	Up	3.01852e-05	0.000310845
Unigene2039_All	462	5	29	0.5088	2.8815	2.50165	Up	3.01852e-05	0.000310898
CL16658.Contig2_All	1227	5	29	0.1916	1.085	2.50153	Up	3.01852e-05	0.000310925
Unigene28473_All	896	5	29	0.2624	1.4858	2.5014	Up	3.01852e-05	0.000310792
CL9837.Contig2_All	1083	5	29	0.2171	1.2292	2.50129	Up	3.01852e-05	0.000310766
Unigene26774_All	1759	81	468	2.165	12.2138	2.49607	Up	2.1128e-65	2.30139e-63
CL3488.Contig1_All	707	9	52	0.5985	3.3764	2.49606	Up	1.77637e-08	2.88679e-07
CL14551.Contig2_All	711	98	566	6.4802	36.544	2.49552	Up	1.00911e-78	1.28296e-76
CL16807.Contig2_All	1764	40	231	1.0661	6.0115	2.49538	Up	4.48028e-33	2.56488e-31
CL1172.Contig2_All	1275	61	352	2.2493	12.6737	2.49429	Up	1.4774e-49	1.23108e-47
CL11499.Contig1_All	1265	13	75	0.4832	2.7217	2.49382	Up	1.15308e-11	2.50479e-10
Unigene12723_All	773	17	98	1.034	5.8199	2.49276	Up	7.8373e-15	2.13807e-13
CL724.Contig2_All	2256	882	5082	18.3807	103.411	2.49212	Up	0	0
CL4330.Contig4_All	2059	29	167	0.6622	3.7233	2.49124	Up	2.79736e-24	1.19895e-22
Unigene18029_All	2520	32	184	0.597	3.3519	2.48918	Up	1.40939e-26	6.56673e-25
CL7285.Contig6_All	267	16	92	2.8173	15.8178	2.48916	Up	5.5189e-14	1.41733e-12
CL3095.Contig2_All	1511	12	69	0.3734	2.0963	2.48905	Up	8.19682e-11	1.66902e-09
CL758.Contig2_All	1249	257	1471	9.6739	54.0654	2.48254	Up	1.63142e-200	6.10688e-198
CL12096.Contig1_All	347	7	40	0.9484	5.2918	2.48019	Up	9.37236e-07	1.23361e-05
CL10145.Contig4_All	1174	35	200	1.4016	7.8204	2.48017	Up	1.20239e-28	5.99746e-27
CL504.Contig4_All	388	7	40	0.8482	4.7326	2.48016	Up	9.37236e-07	1.23347e-05
CL11150.Contig2_All	1018	7	40	0.3233	1.8038	2.48009	Up	9.37236e-07	1.23374e-05
CL9508.Contig1_All	1318	24	137	0.8561	4.7717	2.47865	Up	4.57636e-20	1.65664e-18
CL68.Contig2_All	608	41	234	3.1704	17.6678	2.47839	Up	3.10644e-33	1.78175e-31
CL1122.Contig22_All	1090	10	57	0.4313	2.4006	2.47663	Up	4.18644e-09	7.28203e-08
CL17084.Contig3_All	882	398	2262	21.2152	117.732	2.47233	Up	6e-306	3.81815e-303
CL14224.Contig1_All	1064	113	642	4.9931	27.6989	2.47182	Up	4.21734e-88	5.96386e-86
CL14318.Contig2_All	1909	25	142	0.6157	3.4147	2.47146	Up	1.10698e-20	4.1031e-19
CL13195.Contig1_All	1061	103	585	4.5641	25.311	2.47136	Up	2.0442e-80	2.65764e-78
CL4189.Contig2_All	2159	669	3797	14.5682	80.7342	2.47036	Up	0	0
Unigene8379_All	861	9	51	0.4914	2.7192	2.46821	Up	3.0122e-08	4.76763e-07
CL3678.Contig3_All	1107	6	34	0.2548	1.4099	2.46816	Up	6.89882e-06	7.95615e-05
CL2911.Contig1_All	1539	27	153	0.8248	4.5638	2.46812	Up	3.84812e-22	1.50572e-20
CL17242.Contig1_All	766	12	68	0.7365	4.0752	2.46811	Up	1.38691e-10	2.76485e-09
CL12644.Contig3_All	480	9	51	0.8815	4.8775	2.46811	Up	3.0122e-08	4.767e-07
CL15407.Contig2_All	892	18	102	0.9487	5.2493	2.4681	Up	3.18148e-15	8.90638e-14
CL11859.Contig1_All	1470	6	34	0.1919	1.0618	2.46809	Up	6.89882e-06	7.95767e-05
Unigene11746_All	545	6	34	0.5176	2.8639	2.46807	Up	6.89882e-06	7.95539e-05
CL2605.Contig2_All	846	9	51	0.5002	2.7674	2.46795	Up	3.0122e-08	4.76638e-07
CL3803.Contig2_All	1446	6	34	0.1951	1.0794	2.46794	Up	6.89882e-06	7.95691e-05
CL14774.Contig1_All	1195	6	34	0.2361	1.3061	2.4678	Up	6.89882e-06	7.95843e-05
Unigene5028_All	1726	9	51	0.2452	1.3564	2.46775	Up	3.0122e-08	4.76825e-07
CL1118.Contig6_All	923	32	181	1.63	9.0022	2.46541	Up	6.74924e-26	3.0655e-24
CL976.Contig2_All	1513	55	311	1.7091	9.4361	2.46495	Up	2.14076e-43	1.57347e-41
CL11610.Contig1_All	1030	50	282	2.2823	12.5684	2.46124	Up	1.9803e-39	1.33539e-37
CL721.Contig8_All	1495	11	62	0.3459	1.9038	2.46046	Up	9.89084e-10	1.82577e-08
Unigene28239_All	775	11	62	0.6673	3.6725	2.46036	Up	9.89084e-10	1.82605e-08
CL5437.Contig4_All	1256	11	62	0.4118	2.2661	2.4602	Up	9.89084e-10	1.82549e-08
CL5646.Contig1_All	1021	148	834	6.815	37.4981	2.46003	Up	2.68254e-113	4.8994e-111
CL15272.Contig1_All	855	8	45	0.4399	2.4161	2.45743	Up	2.18012e-07	3.10622e-06
Unigene15600_All	926	8	45	0.4062	2.2309	2.45736	Up	2.18012e-07	3.10659e-06
CL8200.Contig1_All	1181	5	28	0.199	1.0884	2.45137	Up	5.14426e-05	0.000505143
CL2020.Contig5_All	2408	5	28	0.0976	0.5338	2.45135	Up	5.14426e-05	0.000505102
CL6043.Contig1_All	957	5	28	0.2456	1.3431	2.45118	Up	5.14426e-05	0.000504897
CL14398.Contig3_All	823	250	1400	14.2814	78.0904	2.45101	Up	3.92328e-188	1.37894e-185
CL5646.Contig2_All	1042	80	448	3.6096	19.7369	2.45098	Up	2.11558e-61	2.17509e-59
CL13351.Contig2_All	911	20	112	1.0322	5.6438	2.45094	Up	1.83806e-16	5.49409e-15
CL14483.Contig2_All	467	5	28	0.5034	2.7524	2.45091	Up	5.14426e-05	0.000505061
Unigene2740_All	560	5	28	0.4198	2.2953	2.45091	Up	5.14426e-05	0.00050502
Unigene27454_All	1038	5	28	0.2265	1.2383	2.45078	Up	5.14426e-05	0.000504979
Unigene31397_All	1152	5	28	0.2041	1.1158	2.45073	Up	5.14426e-05	0.000504938
CL3468.Contig1_All	1591	211	1180	6.2351	34.0472	2.44905	Up	1.01634e-158	2.76143e-156
CL6243.Contig5_All	2157	34	190	0.7411	4.0436	2.4479	Up	6.68404e-27	3.14824e-25
CL5261.Contig2_All	742	7	39	0.4435	2.4128	2.4437	Up	1.58961e-06	2.02079e-05
CL8862.Contig1_All	613	7	39	0.5369	2.9206	2.44354	Up	1.58961e-06	2.02036e-05
Unigene15939_All	682	7	39	0.4826	2.6251	2.44347	Up	1.58961e-06	2.021e-05
CL10656.Contig2_All	2046	7	39	0.1609	0.875	2.44312	Up	1.58961e-06	2.02057e-05
CL13805.Contig3_All	419	44	245	4.9371	26.8424	2.44278	Up	3.58456e-34	2.10389e-32
CL366.Contig4_All	658	23	128	1.6434	8.93	2.44198	Up	1.52486e-18	5.11424e-17
Unigene28066_All	1179	78	434	3.1104	16.8984	2.44171	Up	2.80722e-59	2.80973e-57
Unigene11609_All	1052	16	89	0.715	3.8837	2.44142	Up	2.65148e-13	6.47254e-12
CL13257.Contig2_All	1096	16	89	0.6863	3.7278	2.44141	Up	2.65148e-13	6.47385e-12
CL1690.Contig1_All	1094	128	712	5.5008	29.8767	2.44131	Up	3.8757e-96	5.91671e-94
CL12839.Contig2_All	1968	89	495	2.1262	11.5465	2.44111	Up	2.34468e-67	2.63958e-65
CL5209.Contig9_All	1104	52	289	2.2145	12.0171	2.44004	Up	5.5717e-40	3.80171e-38
CL3150.Contig1_All	821	37	205	2.1188	11.4625	2.4356	Up	9.54744e-29	4.77601e-27
CL13763.Contig2_All	612	13	72	0.9987	5.4007	2.43502	Up	5.55576e-11	1.1467e-09
CL8786.Contig1_All	2486	32	177	0.6052	3.2684	2.4331	Up	5.38662e-25	2.3709e-23
CL15543.Contig2_All	964	50	276	2.4385	13.1432	2.43025	Up	4.43204e-38	2.90287e-36
CL3468.Contig3_All	2124	267	1470	5.91	31.7711	2.42649	Up	3.78522e-195	1.39107e-192
Unigene27424_All	1969	127	699	3.0324	16.2967	2.42605	Up	9.8116e-94	1.45025e-91
CL10449.Contig1_All	818	6	33	0.3448	1.852	2.42525	Up	1.17025e-05	0.00012987
Unigene18305_All	952	6	33	0.2963	1.5913	2.42508	Up	1.17025e-05	0.000129881
Unigene28315_All	884	6	33	0.3191	1.7137	2.42503	Up	1.17025e-05	0.000129893
Unigene12731_All	277	12	66	2.0367	10.9379	2.42503	Up	3.94626e-10	7.55557e-09
Unigene7540_All	660	12	66	0.8548	4.5906	2.42502	Up	3.94626e-10	7.55438e-09
CL15073.Contig1_All	1747	18	99	0.4844	2.6014	2.42502	Up	1.51776e-14	4.0501e-13
Unigene15703_All	772	6	33	0.3654	1.9623	2.425	Up	1.17025e-05	0.000129905
CL10277.Contig2_All	1182	38	209	1.5115	8.1171	2.42498	Up	3.8844e-29	1.97003e-27
CL11184.Contig3_All	2561	34	187	0.6242	3.352	2.42494	Up	3.16004e-26	1.45497e-24
Unigene20930_All	1636	10	55	0.2874	1.5433	2.42489	Up	1.19496e-08	1.97836e-07
CL8029.Contig2_All	1123	61	335	2.5538	13.6941	2.42284	Up	1.00438e-45	7.74471e-44
CL10277.Contig3_All	1105	49	269	2.0848	11.1753	2.42233	Up	5.1138e-37	3.25592e-35
Unigene5891_All	976	25	137	1.2043	6.4438	2.41972	Up	1.4872e-19	5.25311e-18
CL3398.Contig2_All	925	186	1019	9.4537	50.571	2.41936	Up	2.17726e-135	4.88401e-133
CL8211.Contig1_All	664	23	126	1.6285	8.7111	2.41931	Up	4.29964e-18	1.4096e-16
CL7728.Contig2_All	980	19	104	0.9115	4.8717	2.41811	Up	3.63612e-15	1.01439e-13
CL14885.Contig1_All	1914	38	208	0.9334	4.9887	2.4181	Up	6.50776e-29	3.27305e-27
CL5223.Contig3_All	1451	34	186	1.1016	5.8846	2.41734	Up	5.29526e-26	2.416e-24
CL12210.Contig3_All	970	15	82	0.727	3.8807	2.41629	Up	3.14236e-12	7.11225e-11
CL4179.Contig2_All	2298	1428	7806	29.2153	155.937	2.41616	Up	0	0
CL14136.Contig2_All	975	95	519	4.5809	24.4361	2.41531	Up	1.0988e-69	1.27867e-67
CL1541.Contig5_All	583	13	71	1.0484	5.5906	2.41481	Up	9.34746e-11	1.89342e-09
CL10205.Contig1_All	666	11	60	0.7765	4.1357	2.41307	Up	2.81198e-09	4.9779e-08
CL6349.Contig3_All	403	11	60	1.2833	6.8346	2.413	Up	2.81198e-09	4.97936e-08
CL4860.Contig1_All	1527	11	60	0.3387	1.8038	2.41296	Up	2.81198e-09	4.97863e-08
CL17928.Contig3_All	1350	22	120	0.7662	4.0805	2.41295	Up	2.9978e-17	9.38281e-16
Unigene30875_All	1616	27	147	0.7855	4.1759	2.4104	Up	8.64668e-21	3.22472e-19
CL17078.Contig2_All	1510	32	174	0.9963	5.2898	2.40856	Up	2.53548e-24	1.08902e-22
Unigene17994_All	1217	7	38	0.2704	1.4334	2.40627	Up	2.68696e-06	3.30157e-05
CL14018.Contig2_All	2296	21	114	0.43	2.2793	2.40618	Up	2.0918e-16	6.23405e-15
CL4207.Contig2_All	481	7	38	0.6842	3.6267	2.40617	Up	2.68696e-06	3.30225e-05
CL15859.Contig2_All	1062	14	76	0.6198	3.2852	2.40611	Up	2.21836e-11	4.72463e-10
CL8323.Contig2_All	1146	7	38	0.2872	1.5222	2.40603	Up	2.68696e-06	3.30191e-05
CL724.Contig3_All	275	26	141	4.445	23.5373	2.40469	Up	6.0052e-20	2.1603e-18
CL6243.Contig3_All	2176	36	195	0.7778	4.1138	2.403	Up	5.19558e-27	2.45674e-25
CL6875.Contig3_All	1180	29	157	1.1554	6.1078	2.40226	Up	5.03454e-22	1.96487e-20
CL2734.Contig2_All	651	37	200	2.6721	14.1032	2.39998	Up	1.25808e-27	6.0796e-26
CL5712.Contig7_All	855	57	308	3.1343	16.5369	2.39947	Up	1.04635e-41	7.42879e-40
CL14398.Contig2_All	1412	87	470	2.8968	15.2803	2.39914	Up	8.86322e-63	9.30238e-61
CL8499.Contig4_All	2024	5	27	0.1161	0.6124	2.39911	Up	8.7278e-05	0.000816134
CL9610.Contig1_All	2214	15	81	0.3185	1.6795	2.39867	Up	5.27366e-12	1.17513e-10
CL10917.Contig1_All	584	5	27	0.4025	2.1224	2.39864	Up	8.7278e-05	0.000815881
Unigene29086_All	277	5	27	0.8486	4.4746	2.3986	Up	8.7278e-05	0.000816071
CL3428.Contig2_All	367	5	27	0.6405	3.3773	2.3986	Up	8.7278e-05	0.000815692
CL17466.Contig2_All	391	5	27	0.6012	3.17	2.39857	Up	8.7278e-05	0.000815944
CL14421.Contig2_All	665	10	54	0.707	3.7277	2.3985	Up	2.0113e-08	3.24936e-07
Unigene31652_All	592	5	27	0.3971	2.0937	2.39848	Up	8.7278e-05	0.000816007
Unigene13000_All	878	10	54	0.5355	2.8234	2.39848	Up	2.0113e-08	3.24849e-07
CL15971.Contig1_All	552	5	27	0.4259	2.2454	2.39839	Up	8.7278e-05	0.000815818
CL7971.Contig2_All	1464	5	27	0.1606	0.8466	2.39821	Up	8.7278e-05	0.000815755
CL1284.Contig1_All	2894	10	54	0.1625	0.8566	2.39818	Up	2.0113e-08	3.24893e-07
CL10746.Contig1_All	1639	13	70	0.3729	1.9606	2.39443	Up	1.56953e-10	3.11659e-09
CL2677.Contig4_All	898	3742	20145	195.911	1029.82	2.39412	Up	0	0
CL1690.Contig2_All	2513	132	710	2.4695	12.9699	2.39288	Up	1.12929e-93	1.66716e-91
Unigene18638_All	984	8	43	0.3822	2.0061	2.39199	Up	6.21364e-07	8.37173e-06
CL14077.Contig2_All	957	8	43	0.393	2.0627	2.39193	Up	6.21364e-07	8.37079e-06
Unigene14746_All	852	24	129	1.3244	6.9506	2.3918	Up	2.90096e-18	9.5938e-17
CL3953.Contig1_All	1365	16	86	0.5511	2.8922	2.39178	Up	1.2556e-12	2.92058e-11
CL872.Contig3_All	1131	8	43	0.3326	1.7453	2.39161	Up	6.21364e-07	8.36986e-06
CL6867.Contig2_All	1256	19	102	0.7112	3.728	2.39007	Up	1.0212e-14	2.76407e-13
CL3698.Contig2_All	1535	11	59	0.3369	1.7645	2.38887	Up	4.72482e-09	8.17733e-08
CL7148.Contig2_All	945	28	150	1.393	7.2867	2.38707	Up	5.83378e-21	2.19121e-19
CL11498.Contig7_All	1126	54	289	2.2547	11.7823	2.38561	Up	5.65476e-39	3.78156e-37
Unigene24711_All	1339	225	1204	7.9001	41.2777	2.38542	Up	5.19358e-157	1.37707e-154
CL27.Contig4_All	1150	23	123	0.9403	4.9099	2.3845	Up	2.01792e-17	6.36034e-16
CL13802.Contig5_All	1982	23	123	0.5456	2.8489	2.38449	Up	2.01792e-17	6.35868e-16
CL976.Contig1_All	1298	41	219	1.4851	7.7453	2.38276	Up	7.23082e-30	3.74738e-28
CL3734.Contig2_All	746	6	32	0.3781	1.9692	2.38077	Up	1.97725e-05	0.00021063
Unigene6071_All	838	6	32	0.3366	1.753	2.38072	Up	1.97725e-05	0.000210668
CL15494.Contig2_All	557	6	32	0.5064	2.6373	2.38071	Up	1.97725e-05	0.000210686
Unigene29372_All	658	6	32	0.4287	2.2325	2.38062	Up	1.97725e-05	0.000210612
CL2816.Contig1_All	499	99	528	9.3275	48.5739	2.38062	Up	1.08981e-69	1.26943e-67
Unigene30468_All	1459	12	64	0.3867	2.0137	2.38056	Up	1.11328e-09	2.04784e-08
CL11316.Contig2_All	1507	9	48	0.2808	1.4622	2.38053	Up	1.44511e-07	2.11047e-06
CL3478.Contig4_All	1057	6	32	0.2669	1.3898	2.38051	Up	1.97725e-05	0.000210705
CL15291.Contig2_All	1176	6	32	0.2399	1.2491	2.38038	Up	1.97725e-05	0.000210649
CL5723.Contig2_All	1422	6	32	0.1984	1.033	2.38036	Up	1.97725e-05	0.000210593
CL17084.Contig4_All	1629	556	2961	16.0467	83.4424	2.3785	Up	0	0
CL8504.Contig2_All	1263	589	3136	21.9252	113.984	2.37816	Up	0	0
CL1235.Contig2_All	1202	34	181	1.3299	6.9126	2.37791	Up	6.91126e-25	3.02763e-23
CL3204.Contig4_All	2922	28	149	0.4505	2.3409	2.37746	Up	9.74108e-21	3.61947e-19
CL8612.Contig4_All	421	19	101	2.1218	11.0131	2.37586	Up	1.70767e-14	4.54183e-13
CL7702.Contig3_All	1217	29	154	1.1203	5.809	2.3744	Up	2.34764e-21	8.93729e-20
CL15284.Contig1_All	916	13	69	0.6672	3.458	2.37375	Up	2.62996e-10	5.12215e-09
CL9481.Contig4_All	492	13	69	1.2423	6.438	2.3736	Up	2.62996e-10	5.1238e-09
CL4487.Contig6_All	1915	13	69	0.3192	1.6541	2.37351	Up	2.62996e-10	5.12298e-09
CL5880.Contig2_All	2056	73	387	1.6693	8.6409	2.37194	Up	2.6265e-51	2.27157e-49
Unigene8921_All	991	10	53	0.4744	2.4551	2.37161	Up	3.37652e-08	5.31435e-07
CL12446.Contig3_All	1809	10	53	0.2599	1.345	2.37158	Up	3.37652e-08	5.31297e-07
CL10578.Contig2_All	650	10	53	0.7233	3.7431	2.37157	Up	3.37652e-08	5.31366e-07
CL14163.Contig2_All	1204	10	53	0.3905	2.0208	2.37153	Up	3.37652e-08	5.31227e-07
CL1104.Contig2_All	3756	84	445	1.0514	5.4388	2.37098	Up	1.01407e-58	1.00417e-56
CL13825.Contig2_All	593	118	625	9.3553	48.3832	2.37065	Up	8.94046e-82	1.18139e-79
CL5369.Contig1_All	2121	24	127	0.532	2.7487	2.36925	Up	8.0935e-18	2.60813e-16
Unigene15147_All	1495	31	164	0.9749	5.0358	2.36889	Up	1.36525e-22	5.43709e-21
Unigene44_All	666	7	37	0.4941	2.5503	2.36779	Up	4.52572e-06	5.37257e-05
Unigene15640_All	1227	7	37	0.2682	1.3843	2.36778	Up	4.52572e-06	5.37309e-05
Unigene12897_All	1168	14	74	0.5635	2.9084	2.36774	Up	6.22698e-11	1.27999e-09
CL14333.Contig2_All	1844	42	222	1.0708	5.5266	2.3677	Up	4.86632e-30	2.53611e-28
CL6157.Contig3_All	1004	7	37	0.3278	1.6918	2.36767	Up	4.52572e-06	5.37415e-05
Unigene9308_All	863	14	74	0.7627	3.9363	2.36765	Up	6.22698e-11	1.27978e-09
CL8193.Contig1_All	2187	14	74	0.301	1.5533	2.3675	Up	6.22698e-11	1.27956e-09
CL2185.Contig4_All	1207	7	37	0.2727	1.4072	2.36744	Up	4.52572e-06	5.37362e-05
CL1364.Contig9_All	628	39	206	2.9197	15.0583	2.36667	Up	5.71398e-28	2.78687e-26
CL8029.Contig1_All	1116	259	1368	10.9111	56.2719	2.36662	Up	1.74823e-176	5.62168e-174
CL9222.Contig2_All	4242	32	169	0.3547	1.8289	2.3663	Up	3.29422e-23	1.34243e-21
Unigene9339_All	959	43	227	2.1081	10.8662	2.36583	Up	1.1786e-30	6.25012e-29
CL10975.Contig1_All	874	18	95	0.9683	4.9898	2.36546	Up	1.194e-13	2.99076e-12
Unigene21069_All	2509	60	316	1.1243	5.7817	2.36247	Up	5.37168e-42	3.85219e-40
CL10305.Contig1_All	650	19	100	1.3743	7.0625	2.36148	Up	2.8514e-14	7.46389e-13
Unigene15308_All	820	31	163	1.7774	9.1252	2.36009	Up	2.27472e-22	8.97917e-21
CL3232.Contig5_All	1932	82	431	1.9954	10.2409	2.35959	Up	1.30939e-56	1.24954e-54
Unigene27937_All	823	125	657	7.1407	36.6467	2.35955	Up	2.1112e-85	2.91394e-83
CL11502.Contig1_All	1692	8	42	0.2223	1.1395	2.35782	Up	1.04404e-06	1.36291e-05
CL1937.Contig5_All	1383	8	42	0.272	1.3941	2.35766	Up	1.04404e-06	1.36306e-05
CL2770.Contig1_All	2549	902	4733	16.6368	85.2386	2.35713	Up	0	0
CL11260.Contig2_All	969	37	194	1.7952	9.1907	2.35603	Up	2.70768e-26	1.24954e-24
Unigene21254_All	2473	17	89	0.3232	1.6521	2.3538	Up	8.35676e-13	1.97536e-11
Unigene21039_All	2016	70	366	1.6324	8.3341	2.35203	Up	3.86144e-48	3.13342e-46
CL4601.Contig2_All	1272	635	3320	23.4703	119.818	2.35193	Up	0	0
CL16697.Contig2_All	781	9	47	0.5418	2.7626	2.35019	Up	2.42338e-07	3.43702e-06
CL7935.Contig1_All	945	9	47	0.4478	2.2832	2.35013	Up	2.42338e-07	3.43742e-06
CL2164.Contig2_All	1203	73	381	2.8529	14.5388	2.34941	Up	5.5509e-50	4.69006e-48
Unigene5748_All	1782	23	120	0.6068	3.0913	2.34892	Up	9.36708e-17	2.85278e-15
CL13916.Contig3_All	771	23	120	1.4025	7.1449	2.34891	Up	9.36708e-17	2.85206e-15
CL5022.Contig4_All	1413	321	1674	10.6806	54.3855	2.34823	Up	1.53738e-213	6.23765e-211
CL9517.Contig1_All	709	10	52	0.6631	3.3669	2.34412	Up	5.65316e-08	8.65973e-07
Unigene18393_All	377	10	52	1.2471	6.3319	2.34406	Up	5.65316e-08	8.65863e-07
CL17159.Contig2_All	1177	596	3098	23.8068	120.83	2.34353	Up	0	0
Unigene17708_All	1965	124	644	2.9668	15.045	2.3423	Up	4.99564e-83	6.68896e-81
Unigene5777_All	1303	26	135	0.9381	4.7562	2.342	Up	1.29617e-18	4.37027e-17
CL10512.Contig3_All	1574	53	275	1.5831	8.0204	2.34092	Up	2.2788e-36	1.42759e-34
CL12632.Contig1_All	1293	16	83	0.5818	2.9468	2.34055	Up	5.85522e-12	1.29969e-10
CL9035.Contig3_All	570	11	57	0.9073	4.5906	2.33903	Up	1.32418e-08	2.18096e-07
CL17537.Contig1_All	1234	22	114	0.8382	4.2409	2.339	Up	6.5045e-16	1.88913e-14
CL6509.Contig1_All	883	45	233	2.396	12.1134	2.3379	Up	5.27966e-31	2.82958e-29
CL7445.Contig2_All	787	17	88	1.0156	5.1331	2.3375	Up	1.39275e-12	3.23091e-11
CL942.Contig4_All	801	29	150	1.7021	8.5966	2.33645	Up	1.80364e-20	6.62436e-19
CL3095.Contig3_All	1413	6	31	0.1996	1.0071	2.33502	Up	3.32684e-05	0.000339616
CL11470.Contig2_All	2415	6	31	0.1168	0.5893	2.33496	Up	3.32684e-05	0.000339903
Unigene18751_All	882	6	31	0.3198	1.6135	2.33495	Up	3.32684e-05	0.000339846
Unigene1479_All	825	6	31	0.3419	1.725	2.33495	Up	3.32684e-05	0.00033976
CL2786.Contig1_All	418	6	31	0.6748	3.4045	2.33491	Up	3.32684e-05	0.000339932
CL1525.Contig5_All	1060	6	31	0.2661	1.3425	2.33488	Up	3.32684e-05	0.000339702
CL7942.Contig5_All	1065	18	93	0.7946	4.0087	2.33483	Up	3.31774e-13	8.0502e-12
Unigene15635_All	931	6	31	0.303	1.5286	2.33482	Up	3.32684e-05	0.000339645
CL17233.Contig1_All	821	6	31	0.3436	1.7334	2.3348	Up	3.32684e-05	0.000339588
Unigene23382_All	741	6	31	0.3807	1.9205	2.33476	Up	3.32684e-05	0.000339788
CL27.Contig1_All	918	6	31	0.3073	1.5502	2.33473	Up	3.32684e-05	0.000339731
CL13307.Contig1_All	941	6	31	0.2998	1.5123	2.33467	Up	3.32684e-05	0.000339961
Unigene18748_All	551	6	31	0.512	2.5827	2.33466	Up	3.32684e-05	0.000339817
CL17515.Contig1_All	1225	6	31	0.2303	1.1617	2.33465	Up	3.32684e-05	0.000339875
Unigene35359_All	831	6	31	0.3395	1.7125	2.33462	Up	3.32684e-05	0.000339674
CL2271.Contig2_All	592	215	1110	17.0745	86.0738	2.33373	Up	3.43122e-141	7.99349e-139
CL1172.Contig4_All	1186	31	160	1.2289	6.1931	2.33329	Up	1.04616e-21	4.01935e-20
CL10525.Contig4_All	1783	403	2079	10.6264	53.527	2.33261	Up	1.27614e-262	6.98172e-260
CL12867.Contig4_All	1782	19	98	0.5013	2.5246	2.33231	Up	7.91384e-14	2.01187e-12
CL16831.Contig1_All	1279	78	402	2.8672	14.4286	2.33122	Up	3.57446e-52	3.15922e-50
CL9330.Contig5_All	1532	602	3101	18.4744	92.9207	2.33047	Up	0	0
CL1603.Contig3_All	620	20	103	1.5166	7.6263	2.33014	Up	1.88995e-14	5.01229e-13
Unigene28871_All	841	7	36	0.3913	1.9651	2.32826	Up	7.5946e-06	8.7079e-05
Unigene15414_All	916	7	36	0.3593	1.8042	2.3281	Up	7.5946e-06	8.70707e-05
CL16076.Contig1_All	578	29	149	2.3589	11.8339	2.32674	Up	2.99512e-20	1.08945e-18
CL11610.Contig2_All	1046	161	827	7.2365	36.2947	2.32639	Up	2.88886e-105	4.83107e-103
CL2855.Contig1_All	946	30	154	1.4909	7.4731	2.32552	Up	7.20978e-21	2.69882e-19
CL8945.Contig4_All	2051	39	200	0.894	4.4765	2.32402	Up	1.2033e-26	5.61516e-25
CL3468.Contig2_All	2176	338	1733	7.3028	36.5602	2.32375	Up	3.0344e-218	1.26077e-215
CL5703.Contig1_All	1098	8	41	0.3425	1.7142	2.32336	Up	1.74838e-06	2.21099e-05
Unigene19253_All	1386	16	82	0.5427	2.7159	2.3232	Up	9.74732e-12	2.13424e-10
CL1179.Contig1_All	1230	48	246	1.8347	9.1812	2.32314	Up	2.06196e-32	1.15527e-30
CL10021.Contig1_All	1387	17	87	0.5762	2.8795	2.32118	Up	2.31718e-12	5.30115e-11
CL14280.Contig1_All	1377	28	143	0.956	4.7673	2.31809	Up	2.06562e-19	7.24123e-18
CL4501.Contig2_All	1915	19	97	0.4665	2.3253	2.31747	Up	1.31535e-13	3.2852e-12
CL10446.Contig1_All	1279	116	592	4.264	21.2481	2.31705	Up	1.7129e-75	2.09832e-73
Unigene23752_All	281	10	51	1.6731	8.3317	2.31609	Up	9.43856e-08	1.40645e-06
CL4109.Contig2_All	1628	10	51	0.2888	1.4381	2.31602	Up	9.43856e-08	1.40663e-06
CL17084.Contig1_All	744	539	2748	34.0603	169.556	2.3156	Up	0	0
CL14058.Contig2_All	2008	41	209	0.96	4.7781	2.31533	Up	1.16476e-27	5.63768e-26
CL5366.Contig3_All	717	21	107	1.377	6.8507	2.31472	Up	7.50388e-15	2.0522e-13
CL6401.Contig4_All	931	153	779	7.7263	38.4111	2.31367	Up	1.29457e-98	2.03277e-96
Unigene28442_All	803	11	56	0.644	3.2014	2.31357	Up	2.20836e-08	3.54593e-07
CL4720.Contig13_All	2015	22	112	0.5133	2.5516	2.31353	Up	1.79513e-15	5.09617e-14
CL14665.Contig2_All	1874	709	3609	17.7872	88.407	2.31332	Up	0	0
CL15110.Contig1_All	763	45	229	2.7728	13.7778	2.31293	Up	3.98626e-30	2.08105e-28
CL6190.Contig6_All	1175	12	61	0.4801	2.3832	2.31149	Up	5.18576e-09	8.94054e-08
CL17359.Contig2_All	1518	37	188	1.1459	5.6853	2.31076	Up	5.66196e-25	2.48756e-23
CL6243.Contig8_All	1982	37	188	0.8777	4.3544	2.31067	Up	5.66196e-25	2.48666e-23
CL1690.Contig4_All	1047	13	66	0.5838	2.8938	2.30942	Up	1.22148e-09	2.23802e-08
Unigene24428_All	2344	40	203	0.8023	3.9756	2.30896	Up	7.97852e-27	3.74919e-25
CL2945.Contig3_All	1184	14	71	0.5559	2.7528	2.308	Up	2.88476e-10	5.60486e-09
CL3386.Contig4_All	1242	31	157	1.1735	5.8029	2.30596	Up	4.7692e-21	1.79861e-19
CL5022.Contig2_All	1386	321	1625	10.8886	53.822	2.30538	Up	8.0726e-203	3.05013e-200
CL8029.Contig5_All	938	16	81	0.802	3.9642	2.30536	Up	1.61965e-11	3.48512e-10
CL15162.Contig2_All	1678	18	91	0.5043	2.4895	2.3035	Up	9.1588e-13	2.15568e-11
Unigene18208_All	1365	38	192	1.3088	6.4571	2.30264	Up	2.26232e-25	1.01009e-23
CL4899.Contig1_All	3142	57	288	0.8529	4.2078	2.30262	Up	2.69436e-37	1.72639e-35
CL16197.Contig2_All	1601	41	207	1.204	5.9354	2.30151	Up	3.1898e-27	1.52259e-25
CL6078.Contig6_All	1558	62	313	1.8709	9.2225	2.30143	Up	2.26326e-40	1.55746e-38
CL14208.Contig1_All	3293	131	661	1.8703	9.2147	2.30067	Up	2.20416e-83	2.97102e-81
CL4408.Contig4_All	1517	24	121	0.7438	3.6616	2.29949	Up	1.70696e-16	5.10981e-15
Unigene25029_All	1418	26	131	0.862	4.241	2.29864	Up	9.8226e-18	3.15691e-16
CL4018.Contig2_All	2703	1476	7433	25.6727	126.237	2.29783	Up	0	0
Unigene21221_All	1083	33	166	1.4326	7.0364	2.2962	Up	4.57918e-22	1.78831e-20
CL5904.Contig1_All	1429	34	171	1.1186	5.4933	2.29598	Up	1.10377e-22	4.41317e-21
CL17084.Contig6_All	1044	164	823	7.3854	36.1884	2.29278	Up	5.82486e-103	9.55593e-101
Unigene26997_All	562	76	381	6.3578	31.1213	2.2913	Up	1.52967e-48	1.25305e-46
CL4689.Contig4_All	1529	7	35	0.2152	1.0508	2.28774	Up	1.2695e-05	0.0001401
CL5758.Contig2_All	2664	9	45	0.1588	0.7754	2.28773	Up	6.75238e-07	9.04517e-06
Unigene31164_All	1211	6	30	0.2329	1.1372	2.2877	Up	5.57306e-05	0.000543804
CL9938.Contig1_All	962	9	45	0.4398	2.1474	2.28767	Up	6.75238e-07	9.04316e-06
CL16084.Contig2_All	628	7	35	0.524	2.5585	2.28766	Up	1.2695e-05	0.000140164
CL17730.Contig3_All	1679	8	40	0.224	1.0937	2.28765	Up	2.91772e-06	3.56627e-05
CL10402.Contig2_All	1080	7	35	0.3047	1.4877	2.28762	Up	1.2695e-05	0.000140138
CL1276.Contig4_All	397	6	30	0.7105	3.469	2.28761	Up	5.57306e-05	0.00054376
CL573.Contig4_All	2303	7	35	0.1429	0.6977	2.2876	Up	1.2695e-05	0.000140112
CL17177.Contig1_All	718	8	40	0.5238	2.5574	2.28759	Up	2.91772e-06	3.56663e-05
CL7844.Contig2_All	723	8	40	0.5202	2.5398	2.28758	Up	2.91772e-06	3.56699e-05
CL8166.Contig2_All	729	8	40	0.5159	2.5188	2.28757	Up	2.91772e-06	3.56735e-05
CL11674.Contig3_All	507	7	35	0.6491	3.1691	2.28756	Up	1.2695e-05	0.000140151
Unigene31398_All	541	7	35	0.6083	2.9699	2.28756	Up	1.2695e-05	0.000140176
Unigene23919_All	722	6	30	0.3907	1.9075	2.28755	Up	5.57306e-05	0.000543892
Unigene5740_All	1330	27	135	0.9544	4.6596	2.28754	Up	3.90142e-18	1.28218e-16
CL1368.Contig4_All	832	26	130	1.4692	7.1728	2.28751	Up	1.62489e-17	5.15513e-16
Unigene6639_All	578	10	50	0.8134	3.9711	2.2875	Up	1.57134e-07	2.28213e-06
CL13720.Contig1_All	660	6	30	0.4274	2.0866	2.2875	Up	5.57306e-05	0.000543716
Unigene49518_All	297	20	100	3.166	15.4566	2.28749	Up	8.62718e-14	2.18449e-12
CL7043.Contig2_All	1314	10	50	0.3578	1.7468	2.28749	Up	1.57134e-07	2.28296e-06
CL14717.Contig1_All	592	6	30	0.4765	2.3263	2.28749	Up	5.57306e-05	0.000543936
CL5073.Contig1_All	550	6	30	0.5129	2.504	2.28749	Up	5.57306e-05	0.000543848
CL4211.Contig2_All	973	19	95	0.9181	4.4821	2.28745	Up	3.61632e-13	8.76412e-12
Unigene35230_All	766	10	50	0.6138	2.9965	2.28744	Up	1.57134e-07	2.28241e-06
CL15705.Contig2_All	984	11	55	0.5256	2.5659	2.28743	Up	3.6732e-08	5.75135e-07
CL15859.Contig1_All	923	10	50	0.5094	2.4868	2.28742	Up	1.57134e-07	2.28186e-06
Unigene11670_All	1096	10	50	0.429	2.0943	2.28742	Up	1.57134e-07	2.28268e-06
Unigene18827_All	441	7	35	0.7463	3.6433	2.28742	Up	1.2695e-05	0.000140087
Unigene1207_All	2017	9	45	0.2098	1.0242	2.28741	Up	6.75238e-07	9.04416e-06
CL8680.Contig7_All	1895	7	35	0.1737	0.8479	2.2873	Up	1.2695e-05	0.000140125
CL10566.Contig2_All	2955	46	229	0.7319	3.5575	2.28115	Up	1.18812e-29	6.11811e-28
CL2426.Contig3_All	1914	832	4139	20.4368	99.2711	2.2802	Up	0	0
CL8064.Contig2_All	979	38	189	1.8249	8.8623	2.27986	Up	1.01998e-24	4.44569e-23
CL11505.Contig1_All	1049	37	184	1.6583	8.0521	2.27966	Up	4.22572e-24	1.79839e-22
CL10981.Contig1_All	1268	32	159	1.1865	5.7564	2.27845	Up	5.18746e-21	1.95209e-19
CL2053.Contig2_All	1122	31	154	1.299	6.3008	2.27813	Up	2.15448e-20	7.88658e-19
CL13314.Contig2_All	1319	1996	9902	71.1456	344.626	2.27618	Up	0	0
CL10460.Contig1_All	1810	248	1229	6.4418	31.1704	2.27464	Up	2.16862e-151	5.50848e-149
CL16669.Contig1_All	1668	42	208	1.1838	5.7245	2.27372	Up	5.72762e-27	2.70408e-25
CL14282.Contig2_All	1647	21	104	0.5995	2.8987	2.27357	Up	3.4069e-14	8.8757e-13
CL129.Contig1_All	753	152	752	9.4903	45.845	2.27224	Up	3.19784e-93	4.69799e-91
CL10754.Contig3_All	1314	37	183	1.3238	6.3933	2.27188	Up	6.96926e-24	2.93807e-22
CL1563.Contig1_All	1037	90	444	4.0803	19.655	2.26815	Up	1.26932e-55	1.1897e-53
CL11594.Contig2_All	608	44	217	3.4024	16.3842	2.26768	Up	5.51636e-28	2.69375e-26
CL6135.Contig1_All	765	13	64	0.7989	3.8405	2.26521	Up	3.36194e-09	5.89793e-08
CL14447.Contig1_All	485	13	64	1.2602	6.0577	2.26512	Up	3.36194e-09	5.89708e-08
CL3398.Contig1_All	946	86	423	4.274	20.5267	2.26384	Up	5.96788e-53	5.33702e-51
Unigene12098_All	1140	36	177	1.4847	7.1275	2.26322	Up	4.75962e-23	1.92983e-21
CL10446.Contig5_All	480	11	54	1.0774	5.1644	2.26105	Up	6.09302e-08	9.29935e-07
Unigene24561_All	918	22	108	1.1267	5.4007	2.26104	Up	1.34443e-14	3.59948e-13
CL10525.Contig1_All	1868	321	1575	8.079	38.7055	2.26029	Up	5.46068e-192	1.9827e-189
CL16772.Contig1_All	1105	20	98	0.8509	4.0713	2.25843	Up	2.35552e-13	5.78042e-12
Unigene25032_All	782	10	49	0.6012	2.8765	2.2584	Up	2.6082e-07	3.68833e-06
Unigene8960_All	247	10	49	1.9034	9.1069	2.25838	Up	2.6082e-07	3.68747e-06
CL1581.Contig2_All	1862	130	637	3.2824	15.7047	2.25837	Up	1.1821e-78	1.50131e-76
CL7452.Contig2_All	1650	50	245	1.4247	6.8163	2.25833	Up	3.00194e-31	1.61387e-29
CL4096.Contig4_All	324	10	49	1.4511	6.9426	2.25833	Up	2.6082e-07	3.6879e-06
CL4689.Contig5_All	1592	19	93	0.5611	2.6817	2.25682	Up	9.8771e-13	2.32023e-11
Unigene11599_All	1741	74	362	1.9983	9.5451	2.25599	Up	2.30636e-45	1.76269e-43
CL12075.Contig3_All	827	9	44	0.5116	2.4424	2.25521	Up	1.12168e-06	1.45688e-05
CL13704.Contig1_All	1187	27	132	1.0694	5.105	2.25511	Up	1.75269e-17	5.54895e-16
CL15149.Contig2_All	556	27	132	2.2831	10.8985	2.25506	Up	1.75269e-17	5.5475e-16
CL5811.Contig1_All	2100	18	88	0.403	1.9237	2.25503	Up	4.14718e-12	9.31156e-11
CL12460.Contig1_All	669	9	44	0.6325	3.0192	2.25503	Up	1.12168e-06	1.45703e-05
Unigene14821_All	1204	58	283	2.2648	10.7902	2.25227	Up	9.6531e-36	5.94265e-34
Unigene24330_All	1127	41	200	1.7104	8.1466	2.25186	Up	1.05763e-25	4.77151e-24
CL3546.Contig3_All	1126	8	39	0.334	1.59	2.25111	Up	4.8515e-06	5.73117e-05
CL10534.Contig2_All	577	8	39	0.6518	3.1028	2.25107	Up	4.8515e-06	5.73061e-05
CL11786.Contig5_All	1540	16	78	0.4885	2.3251	2.25086	Up	7.34552e-11	1.50048e-09
Unigene18454_All	990	118	574	5.6038	26.6162	2.24783	Up	1.19635e-70	1.40435e-68
CL7832.Contig1_All	2603	51	248	0.9211	4.3737	2.24742	Up	1.96449e-31	1.06131e-29
CL6157.Contig1_All	980	7	34	0.3358	1.5927	2.2458	Up	2.11346e-05	0.000224114
CL2458.Contig4_All	403	7	34	0.8166	3.873	2.24575	Up	2.11346e-05	0.000224153
CL1235.Contig8_All	436	14	68	1.5096	7.1597	2.24573	Up	1.31093e-09	2.39574e-08
CL1990.Contig2_All	594	224	1088	17.7294	84.0837	2.24568	Up	3.64122e-132	7.91821e-130
CL7763.Contig3_All	579	7	34	0.5684	2.6957	2.24568	Up	2.11346e-05	0.000224192
CL12454.Contig2_All	338	7	34	0.9737	4.6178	2.24566	Up	2.11346e-05	0.000224172
CL8680.Contig8_All	2114	7	34	0.1557	0.7383	2.24544	Up	2.11346e-05	0.000224133
CL361.Contig2_All	2173	7	34	0.1515	0.7183	2.24527	Up	2.11346e-05	0.000224212
CL1510.Contig3_All	1044	62	301	2.7921	13.2354	2.24498	Up	9.01778e-38	5.8306e-36
CL13941.Contig2_All	2492	101	490	1.9055	9.0265	2.244	Up	1.95793e-60	1.98765e-58
Unigene21518_All	1313	13	63	0.4655	2.2026	2.24235	Up	5.5576e-09	9.54757e-08
CL3001.Contig3_All	2513	19	92	0.3555	1.6806	2.24105	Up	1.62818e-12	3.76405e-11
CL12927.Contig2_All	1704	6	29	0.1655	0.7813	2.23905	Up	9.29258e-05	0.000864068
Unigene6569_All	1189	6	29	0.2372	1.1197	2.23894	Up	9.29258e-05	0.000864001
CL249.Contig15_All	939	12	58	0.6008	2.8355	2.23865	Up	2.36278e-08	3.78383e-07
CL1675.Contig10_All	334	12	58	1.6891	7.9717	2.23863	Up	2.36278e-08	3.78333e-07
Unigene26414_All	881	6	29	0.3202	1.5111	2.23855	Up	9.29258e-05	0.000863935
CL1347.Contig7_All	2306	36	174	0.734	3.4639	2.23855	Up	2.11772e-22	8.36762e-21
Unigene27833_All	908	6	29	0.3107	1.4662	2.23849	Up	9.29258e-05	0.000864134
CL6174.Contig3_All	2515	41	198	0.7664	3.6141	2.23747	Up	2.855e-25	1.2719e-23
CL17018.Contig2_All	348	115	555	15.5364	73.2122	2.23643	Up	5.984e-68	6.81274e-66
Unigene49679_All	1232	22	106	0.8395	3.9497	2.23414	Up	3.647e-14	9.48487e-13
CL3158.Contig2_All	907	11	53	0.5702	2.6825	2.23404	Up	1.00785e-07	1.49665e-06
CL2981.Contig3_All	2085	22	106	0.4961	2.3338	2.23398	Up	3.647e-14	9.48283e-13
Unigene12368_All	1329	82	395	2.9008	13.644	2.23374	Up	9.00586e-49	7.39729e-47
CL1957.Contig2_All	1630	38	183	1.096	5.1539	2.23342	Up	2.02538e-23	8.33508e-22
CL3232.Contig7_All	1217	96	462	3.7086	17.4269	2.23237	Up	1.00926e-56	9.66176e-55
CL10460.Contig2_All	1837	116	557	2.9688	13.9192	2.22912	Up	6.40734e-68	7.281e-66
CL9812.Contig1_All	516	25	120	2.2778	10.6758	2.22863	Up	8.23456e-16	2.38074e-14
Unigene12683_All	1148	15	72	0.6143	2.8791	2.2286	Up	5.1109e-10	9.71312e-09
CL1013.Contig2_All	2136	15	72	0.3302	1.5474	2.22843	Up	5.1109e-10	9.71159e-09
CL2254.Contig2_All	2155	84	403	1.8326	8.5847	2.22788	Up	1.42975e-49	1.19384e-47
CL5873.Contig1_All	620	48	230	3.6398	17.0296	2.22611	Up	6.10926e-29	3.0739e-27
CL13824.Contig3_All	583	66	316	5.3224	24.8822	2.22497	Up	3.71112e-39	2.48727e-37
CL7347.Contig3_All	1394	33	158	1.113	5.2031	2.22492	Up	2.47932e-20	9.05102e-19
Unigene8739_All	2307	70	335	1.4265	6.666	2.22434	Up	2.11588e-41	1.48996e-39
CL16552.Contig2_All	512	14	67	1.2856	6.0072	2.22425	Up	2.16156e-09	3.87013e-08
CL1188.Contig5_All	1210	46	220	1.7873	8.3465	2.22339	Up	1.04233e-27	5.06131e-26
Unigene14586_All	568	9	43	0.7449	3.4753	2.22202	Up	1.85699e-06	2.34173e-05
CL11502.Contig2_All	1809	9	43	0.2339	1.0912	2.22195	Up	1.85699e-06	2.34148e-05
CL16508.Contig2_All	3335	72	344	1.015	4.7351	2.22192	Up	2.0454e-42	1.47821e-40
CL8913.Contig2_All	915	18	86	0.9249	4.3147	2.22189	Up	1.12496e-11	2.44678e-10
CL923.Contig1_All	1100	123	587	5.2571	24.4971	2.22027	Up	3.83892e-71	4.53277e-69
CL5022.Contig3_All	1309	439	2095	15.7673	73.4706	2.22023	Up	3.3785e-249	1.67413e-246
Unigene18492_All	1517	13	62	0.4029	1.8762	2.21932	Up	9.16448e-09	1.53854e-07
CL1419.Contig4_All	2051	1734	8264	39.748	184.967	2.21831	Up	0	0
CL12884.Contig1_All	2390	17	81	0.3344	1.5558	2.21801	Up	4.73044e-11	9.8256e-10
CL177.Contig1_All	1802	38	181	0.9914	4.611	2.21754	Up	5.44538e-23	2.20271e-21
CL3772.Contig1_All	911	38	181	1.9611	9.1207	2.21748	Up	5.44538e-23	2.20197e-21
CL6886.Contig5_All	2341	143	680	2.8719	13.3345	2.21509	Up	6.62596e-82	8.77472e-80
CL16508.Contig1_All	3337	49	233	0.6904	3.2053	2.21496	Up	3.96884e-29	2.01201e-27
CL13815.Contig1_All	1005	8	38	0.3742	1.7357	2.21364	Up	8.0365e-06	9.17456e-05
Unigene22089_All	986	20	95	0.9536	4.423	2.21357	Up	1.04974e-12	2.46117e-11
CL5368.Contig9_All	2143	8	38	0.1755	0.814	2.21356	Up	8.0365e-06	9.17542e-05
CL7967.Contig2_All	573	8	38	0.6564	3.0444	2.21351	Up	8.0365e-06	9.17715e-05
CL8056.Contig3_All	772	8	38	0.4872	2.2596	2.21348	Up	8.0365e-06	9.17629e-05
CL9005.Contig1_All	1321	12	57	0.4271	1.9808	2.21344	Up	3.89654e-08	6.08529e-07
Unigene35262_All	741	12	57	0.7614	3.5312	2.21343	Up	3.89654e-08	6.0845e-07
CL4018.Contig4_All	2802	761	3613	12.7688	59.1929	2.2128	Up	0	0
CL3027.Contig5_All	1419	82	389	2.7168	12.5845	2.21167	Up	1.73114e-47	1.3834e-45
Unigene21683_All	707	19	90	1.2635	5.8438	2.20948	Up	4.4011e-12	9.85788e-11
CL10585.Contig1_All	2744	34	161	0.5825	2.6935	2.20915	Up	1.60502e-20	5.91645e-19
CL4745.Contig2_All	1088	63	298	2.7223	12.5735	2.20749	Up	1.13461e-36	7.16364e-35
CL16770.Contig3_All	1941	11	52	0.2664	1.2298	2.20676	Up	1.66225e-07	2.40492e-06
Unigene25168_All	681	11	52	0.7594	3.5053	2.20661	Up	1.66225e-07	2.40521e-06
CL15769.Contig1_All	2352	73	345	1.4592	6.7337	2.20622	Up	3.55574e-42	2.55295e-40
CL1131.Contig2_All	1883	219	1035	5.468	25.2325	2.2062	Up	4.05916e-123	8.17975e-121
CL16694.Contig5_All	1047	18	85	0.8083	3.7268	2.20497	Up	1.84762e-11	3.95804e-10
CL4899.Contig2_All	3180	96	453	1.4193	6.5394	2.20398	Up	8.45034e-55	7.81724e-53
CL27.Contig3_All	1200	46	217	1.8022	8.3013	2.20358	Up	4.56922e-27	2.16564e-25
Unigene12792_All	574	7	33	0.5733	2.6392	2.20274	Up	3.50348e-05	0.000356175
Unigene15759_All	798	7	33	0.4124	1.8984	2.20267	Up	3.50348e-05	0.000356205
CL14781.Contig1_All	1744	63	297	1.6983	7.8177	2.20265	Up	1.85388e-36	1.16441e-34
Unigene9307_All	817	175	825	10.0704	46.3555	2.20262	Up	2.6072e-98	4.07276e-96
CL9812.Contig2_All	477	14	66	1.3799	6.3518	2.2026	Up	3.55574e-09	6.22978e-08
CL10766.Contig1_All	497	7	33	0.6622	3.0481	2.20257	Up	3.50348e-05	0.000356145
CL9099.Contig1_All	653	7	33	0.504	2.3199	2.20257	Up	3.50348e-05	0.000356235
Unigene15778_All	571	7	33	0.5764	2.6531	2.20254	Up	3.50348e-05	0.000356295
CL14547.Contig3_All	1118	7	33	0.2944	1.355	2.20244	Up	3.50348e-05	0.000356265
CL2184.Contig4_All	983	24	113	1.1479	5.2771	2.20075	Up	9.23954e-15	2.50591e-13
CL7408.Contig2_All	1081	17	80	0.7394	3.3973	2.19996	Up	7.7679e-11	1.58381e-09
CL8974.Contig7_All	420	64	301	7.1641	32.8993	2.1992	Up	7.35472e-37	4.6704e-35
CL11122.Contig1_All	1725	10	47	0.2725	1.2508	2.19852	Up	7.11908e-07	9.50794e-06
Unigene9244_All	746	10	47	0.6302	2.8922	2.19829	Up	7.11908e-07	9.51004e-06
Unigene9698_All	611	10	47	0.7695	3.5312	2.19817	Up	7.11908e-07	9.50899e-06
CL3218.Contig5_All	1265	10	47	0.3717	1.7056	2.19807	Up	7.11908e-07	9.50689e-06
CL17018.Contig3_All	784	610	2866	36.5802	167.815	2.19773	Up	0	0
Unigene26775_All	1033	23	108	1.0468	4.7995	2.1969	Up	3.85604e-14	1.00177e-12
CL2426.Contig7_All	1831	23	108	0.5906	2.7077	2.19681	Up	3.85604e-14	1.00199e-12
CL5977.Contig1_All	2770	82	385	1.3918	6.3804	2.19669	Up	1.23138e-46	9.69925e-45
CL5822.Contig4_All	1779	16	75	0.4228	1.9353	2.19451	Up	3.27122e-10	6.32321e-09
CL16076.Contig2_All	674	19	89	1.3253	6.0618	2.19343	Up	7.21634e-12	1.59363e-10
CL5422.Contig2_All	1127	19	89	0.7926	3.6252	2.1934	Up	7.21634e-12	1.59392e-10
CL573.Contig2_All	2112	19	89	0.423	1.9345	2.19323	Up	7.21634e-12	1.59421e-10
CL1115.Contig8_All	1842	104	487	2.6545	12.1369	2.19289	Up	1.98146e-58	1.95093e-56
CL5209.Contig8_All	1196	22	103	0.8648	3.9534	2.19266	Up	1.6107e-13	4.00136e-12
CL16831.Contig2_All	1321	109	510	3.8793	17.723	2.19175	Up	4.53632e-61	4.64025e-59
CL16366.Contig1_All	891	30	140	1.583	7.2131	2.18796	Up	7.7827e-18	2.51065e-16
CL10446.Contig3_All	440	48	224	5.1289	23.3703	2.18795	Up	1.168e-27	5.64884e-26
CL10446.Contig6_All	496	9	42	0.8531	3.8872	2.18794	Up	3.06348e-06	3.73123e-05
Unigene30686_All	1933	57	266	1.3864	6.3171	2.18792	Up	1.47537e-32	8.30467e-31
CL3775.Contig3_All	2465	15	70	0.2861	1.3036	2.18791	Up	1.38012e-09	2.51648e-08
CL3562.Contig7_All	1257	24	112	0.8977	4.0903	2.1879	Up	1.51202e-14	4.03565e-13
CL1849.Contig3_All	2797	21	98	0.353	1.6084	2.18789	Up	6.7344e-13	1.60347e-11
Unigene633_All	1482	15	70	0.4759	2.1683	2.18783	Up	1.38012e-09	2.5161e-08
CL4961.Contig1_All	931	186	866	9.3928	42.701	2.18464	Up	4.49784e-102	7.32918e-100
CL2426.Contig2_All	1906	353	1643	8.7073	39.5716	2.18417	Up	6.2547e-192	2.2642e-189
Unigene17612_All	1626	14	65	0.4048	1.8351	2.18058	Up	5.83498e-09	9.99852e-08
CL16012.Contig1_All	2334	14	65	0.282	1.2784	2.18057	Up	5.83498e-09	9.99994e-08
CL2507.Contig3_All	528	11	51	0.9795	4.4341	2.17852	Up	2.73332e-07	3.854e-06
Unigene49590_All	872	11	51	0.5931	2.6849	2.17852	Up	2.73332e-07	3.85445e-06
CL9909.Contig1_All	389	11	51	1.3295	6.0185	2.17852	Up	2.73332e-07	3.85355e-06
CL6467.Contig3_All	1070	86	398	3.7787	17.0753	2.17595	Up	1.32149e-47	1.06025e-45
CL7154.Contig1_All	1336	8	37	0.2815	1.2713	2.1751	Up	1.32599e-05	0.000145748
CL5973.Contig2_All	1459	8	37	0.2578	1.1642	2.17501	Up	1.32599e-05	0.000145735
CL2945.Contig5_All	1228	8	37	0.3063	1.3832	2.17499	Up	1.32599e-05	0.000145775
Unigene6578_All	762	8	37	0.4936	2.229	2.17498	Up	1.32599e-05	0.000145761
CL1122.Contig23_All	1923	16	74	0.3912	1.7665	2.17492	Up	5.359e-10	1.01591e-08
CL14863.Contig2_All	1515	34	157	1.0551	4.7573	2.17276	Up	1.14317e-19	4.06284e-18
CL7613.Contig4_All	1895	13	60	0.3225	1.4535	2.17216	Up	2.47288e-08	3.9502e-07
Unigene14897_All	1804	31	143	0.8079	3.6389	2.17125	Up	4.99458e-18	1.63212e-16
CL3529.Contig9_All	458	18	83	1.8477	8.3192	2.17071	Up	4.95508e-11	1.02728e-09
CL12949.Contig2_All	669	18	83	1.265	5.6954	2.17066	Up	4.95508e-11	1.02763e-09
CL10697.Contig1_All	1220	18	83	0.6937	3.1231	2.17059	Up	4.95508e-11	1.02745e-09
CL1002.Contig3_All	688	71	327	4.8518	21.8187	2.16897	Up	2.99728e-39	2.01443e-37
CL2919.Contig6_All	2538	38	175	0.7039	3.1653	2.1689	Up	1.03467e-21	3.97648e-20
Unigene23402_All	579	10	46	0.812	3.6471	2.1672	Up	1.1704e-06	1.51397e-05
CL2417.Contig2_All	839	10	46	0.5604	2.5169	2.16712	Up	1.1704e-06	1.51381e-05
Unigene6258_All	804	139	639	8.1281	36.485	2.16631	Up	5.30178e-75	6.46849e-73
Unigene31138_All	554	47	216	3.9886	17.8984	2.16588	Up	2.08426e-26	9.66272e-25
CL14720.Contig1_All	637	49	225	3.6165	16.2148	2.16465	Up	1.99553e-27	9.57443e-26
Unigene13991_All	1451	17	78	0.5508	2.4677	2.16357	Up	2.08178e-10	4.08743e-09
CL13802.Contig4_All	2009	12	55	0.2808	1.2568	2.16214	Up	1.05091e-07	1.55811e-06
CL2426.Contig5_All	1796	36	165	0.9424	4.2174	2.16194	Up	1.77e-20	6.50677e-19
CL11134.Contig3_All	1201	12	55	0.4698	2.1023	2.16185	Up	1.05091e-07	1.5583e-06
Unigene24334_All	1702	19	87	0.5248	2.3465	2.16067	Up	1.92932e-11	4.12576e-10
CL1539.Contig1_All	1522	354	1621	10.935	48.892	2.16065	Up	7.5641e-187	2.64324e-184
CL13197.Contig2_All	1226	40	183	1.5339	6.8522	2.15936	Up	1.60508e-22	6.37329e-21
CL2073.Contig2_All	1978	28	128	0.6655	2.9707	2.15829	Up	3.57236e-16	1.0499e-14
CL2919.Contig1_All	1949	14	64	0.3377	1.5074	2.15825	Up	9.55136e-09	1.5995e-07
Unigene1632_All	1110	7	32	0.2965	1.3234	2.15815	Up	5.78168e-05	0.000561848
CL15088.Contig2_All	850	7	32	0.3872	1.7282	2.15812	Up	5.78168e-05	0.000561803
CL15700.Contig1_All	2242	7	32	0.1468	0.6552	2.15808	Up	5.78168e-05	0.000561758
Unigene12458_All	1252	138	630	5.1821	23.0997	2.15627	Up	1.50781e-73	1.81942e-71
CL4211.Contig1_All	1018	16	73	0.7389	3.2919	2.15547	Up	8.75986e-10	1.62644e-08
CL1539.Contig2_All	1275	341	1554	12.5741	55.9513	2.15372	Up	1.7332e-178	5.67907e-176
CL9924.Contig6_All	542	9	41	0.7807	3.4726	2.15318	Up	5.0353e-06	5.92918e-05
Unigene12059_All	804	9	41	0.5263	2.341	2.15317	Up	5.0353e-06	5.92976e-05
CL872.Contig5_All	2745	29	132	0.4967	2.2075	2.15197	Up	1.40053e-16	4.2165e-15
Unigene3750_All	335	20	91	2.8068	12.47	2.15146	Up	7.51432e-12	1.65762e-10
CL12981.Contig5_All	337	20	91	2.7902	12.396	2.15143	Up	7.51432e-12	1.65792e-10
Unigene25401_All	924	11	50	0.5597	2.4841	2.15	Up	4.48058e-07	6.14355e-06
Unigene11798_All	1568	35	159	1.0494	4.655	2.14922	Up	1.19104e-19	4.2305e-18
[truncated: 5,614 more rows]

## Sheet: A1 vs A3
GeneID	Length (bp)	CK-Expression	Salt Stressed Expression	CK Expression normalized	Salt Stressed Expression normalized	log2 Ratio	Up/Down(HT/HCK)	P-value	FDR
CL3140.Contig1_All	2629	0	201	0	3.6889	11.849	Up	2.22804e-62	6.22786e-60
Unigene37311_All	291	0	19	0	3.1503	11.6213	Up	1.46913e-06	3.52244e-05
CL14398.Contig1_All	254	0	16	0	3.0394	11.5696	Up	1.22224e-05	0.000239293
CL8820.Contig1_All	465	0	29	0	3.0091	11.5551	Up	1.25914e-09	4.83955e-08
Unigene1851_All	594	0	37	0	3.0055	11.5534	Up	4.43084e-12	2.22245e-10
CL5739.Contig2_All	431	0	25	0	2.7987	11.4505	Up	2.1226e-08	7.0327e-07
Unigene12812_All	889	0	50	0	2.7137	11.406	Up	4.56462e-16	3.06417e-14
Unigene37919_All	250	0	14	0	2.702	11.3998	Up	5.01824e-05	0.000833044
Unigene7158_All	596	0	32	0	2.5906	11.3391	Up	1.51349e-10	6.46144e-09
CL12509.Contig2_All	281	0	15	0	2.5756	11.3307	Up	2.47658e-05	0.000447251
CL12835.Contig1_All	1757	0	83	0	2.2793	11.1544	Up	3.45424e-26	3.8675e-24
Unigene37798_All	327	0	15	0	2.2133	11.112	Up	2.47658e-05	0.000446985
CL8338.Contig5_All	320	0	14	0	2.1109	11.0436	Up	5.01824e-05	0.000834188
CL9831.Contig1_All	619	0	26	0	2.0267	10.9849	Up	1.04754e-08	3.60804e-07
Unigene12839_All	337	0	14	0	2.0044	10.969	Up	5.01824e-05	0.000834876
CL11780.Contig2_All	397	0	16	0	1.9446	10.9253	Up	1.22224e-05	0.0002391
Unigene16786_All	557	0	20	0	1.7325	10.7586	Up	7.25038e-07	1.85173e-05
Unigene15514_All	428	0	15	0	1.691	10.7237	Up	2.47658e-05	0.000447051
CL11139.Contig3_All	438	0	15	0	1.6524	10.6903	Up	2.47658e-05	0.000447118
Unigene13643_All	527	0	18	0	1.648	10.6865	Up	2.97686e-06	6.66972e-05
Unigene38342_All	410	0	14	0	1.6476	10.6862	Up	5.01824e-05	0.00083293
Unigene16102_All	452	0	15	0	1.6012	10.6449	Up	2.47658e-05	0.000446851
Unigene2023_All	666	0	22	0	1.5938	10.6383	Up	1.76589e-07	5.02305e-06
Unigene7094_All	671	0	22	0	1.582	10.6275	Up	1.76589e-07	5.02424e-06
Unigene7810_All	530	0	17	0	1.5476	10.5958	Up	6.03192e-06	0.000126593
Unigene37973_All	471	0	15	0	1.5366	10.5855	Up	2.47658e-05	0.000447318
Unigene18937_All	692	0	22	0	1.534	10.5831	Up	1.76589e-07	5.02187e-06
CL11572.Contig1_All	443	0	14	0	1.5248	10.5744	Up	5.01824e-05	0.000833959
CL13705.Contig1_All	468	0	14	0	1.4434	10.4953	Up	5.01824e-05	0.000834303
CL5353.Contig1_All	506	0	15	0	1.4303	10.4821	Up	2.47658e-05	0.000447452
Unigene29310_All	479	0	14	0	1.4102	10.4617	Up	5.01824e-05	0.000834074
Unigene37193_All	565	0	16	0	1.3664	10.4162	Up	1.22224e-05	0.000239138
Unigene19871_All	495	0	14	0	1.3646	10.4143	Up	5.01824e-05	0.000834762
Unigene26316_All	515	0	14	0	1.3116	10.3571	Up	5.01824e-05	0.000833502
Unigene4928_All	593	0	16	0	1.3019	10.3464	Up	1.22224e-05	0.000239216
Unigene26422_All	519	0	14	0	1.3015	10.346	Up	5.01824e-05	0.000834418
CL4104.Contig2_All	1352	0	36	0	1.2848	10.3273	Up	8.9781e-12	4.39049e-10
Unigene27013_All	550	0	14	0	1.2282	10.2623	Up	5.01824e-05	0.000833159
Unigene18756_All	872	0	22	0	1.2173	10.2495	Up	1.76589e-07	5.02542e-06
Unigene19912_All	575	0	14	0	1.1748	10.1982	Up	5.01824e-05	0.000834991
Unigene13868_All	867	0	20	0	1.113	10.1202	Up	7.25038e-07	1.85134e-05
Unigene28906_All	699	0	16	0	1.1044	10.109	Up	1.22224e-05	0.000239254
CL16583.Contig1_All	619	0	14	0	1.0913	10.0918	Up	5.01824e-05	0.000833616
Unigene25805_All	633	0	14	0	1.0671	10.0595	Up	5.01824e-05	0.00083373
Unigene6825_All	920	0	20	0	1.0489	10.0347	Up	7.25038e-07	1.85017e-05
CL5377.Contig9_All	903	0	17	0	0.9084	9.82718	Up	6.03192e-06	0.000126659
Unigene12974_All	748	0	14	0	0.9031	9.81874	Up	5.01824e-05	0.000834647
Unigene1947_All	768	0	14	0	0.8796	9.7807	Up	5.01824e-05	0.000833273
CL4024.Contig10_All	839	0	15	0	0.8626	9.75255	Up	2.47658e-05	0.000447385
Unigene15583_All	1157	0	20	0	0.8341	9.70408	Up	7.25038e-07	1.85056e-05
Unigene35005_All	1065	0	18	0	0.8155	9.67154	Up	2.97686e-06	6.66849e-05
Unigene6857_All	862	0	14	0	0.7836	9.61397	Up	5.01824e-05	0.000835106
CL609.Contig3_All	1049	0	16	0	0.7359	9.52337	Up	1.22224e-05	0.000239177
CL4001.Contig7_All	932	0	14	0	0.7248	9.50144	Up	5.01824e-05	0.000833845
CL1727.Contig4_All	1086	0	15	0	0.6664	9.38024	Up	2.47658e-05	0.000447185
Unigene26838_All	2395	0	30	0	0.6044	9.23936	Up	6.21406e-10	2.47403e-08
CL3053.Contig2_All	1650	0	19	0	0.5556	9.1179	Up	1.46913e-06	3.51965e-05
CL13387.Contig2_All	2571	0	25	0	0.4692	8.87406	Up	2.1226e-08	7.03463e-07
Unigene26581_All	2070	0	20	0	0.4662	8.86481	Up	7.25038e-07	1.85095e-05
CL4918.Contig20_All	1825	0	16	0	0.423	8.72451	Up	1.22224e-05	0.000239061
Unigene4349_All	1997	0	17	0	0.4107	8.68194	Up	6.03192e-06	0.000126615
Unigene28432_All	1828	0	15	0	0.3959	8.62899	Up	2.47658e-05	0.000447519
CL4918.Contig12_All	2462	0	19	0	0.3724	8.54071	Up	1.46913e-06	3.52035e-05
Unigene11903_All	2125	0	16	0	0.3633	8.50502	Up	1.22224e-05	0.000239022
CL658.Contig2_All	2947	0	19	0	0.3111	8.28123	Up	1.46913e-06	3.52174e-05
Unigene26608_All	2424	0	15	0	0.2986	8.22207	Up	2.47658e-05	0.000446918
CL8443.Contig2_All	2903	0	17	0	0.2826	8.14262	Up	6.03192e-06	0.000126637
CL15376.Contig1_All	3274	0	19	0	0.28	8.12928	Up	1.46913e-06	3.52104e-05
CL4918.Contig13_All	3196	0	18	0	0.2717	8.08587	Up	2.97686e-06	6.66725e-05
Unigene26630_All	3516	0	14	0	0.1921	7.58571	Up	5.01824e-05	0.000833387
Unigene26582_All	4274	0	14	0	0.158	7.30378	Up	5.01824e-05	0.000834532
Unigene37626_All	782	1	74	0.0601	4.5658	6.24736	Up	7.75446e-22	7.34386e-20
Unigene6549_All	1755	3	172	0.0804	4.7288	5.87813	Up	2.06132e-48	4.40791e-46
CL10979.Contig4_All	231	3	156	0.6106	32.5843	5.73781	Up	1.25065e-43	2.37258e-41
CL2182.Contig6_All	1962	1	45	0.024	1.1066	5.52696	Up	3.78854e-13	2.07202e-11
Unigene22237_All	542	1	38	0.0867	3.3828	5.28604	Up	4.538e-11	2.0548e-09
Unigene28297_All	653	1	38	0.072	2.8078	5.2853	Up	4.538e-11	2.05403e-09
CL3090.Contig3_All	658	1	37	0.0715	2.7131	5.24586	Up	8.97084e-11	3.93394e-09
Unigene15571_All	785	4	146	0.2396	8.9739	5.22704	Up	2.31432e-39	3.93412e-37
CL10979.Contig1_All	803	298	10198	17.4475	612.767	5.13425	Up	0	0
CL2182.Contig8_All	1880	1	33	0.025	0.8469	5.08219	Up	1.36094e-09	5.21427e-08
CL1260.Contig5_All	1178	1	31	0.0399	1.2697	4.99196	Up	5.27708e-09	1.88965e-07
Unigene8638_All	992	2	58	0.0948	2.8211	4.89523	Up	7.7893e-16	5.13487e-14
CL13407.Contig2_All	768	4	106	0.2449	6.6595	4.76515	Up	1.24656e-27	1.47195e-25
CL13407.Contig3_All	711	5	130	0.3306	8.8221	4.73796	Up	1.65491e-33	2.3902e-31
Unigene3085_All	1019	1	25	0.0461	1.1838	4.68251	Up	3.00742e-07	8.22221e-06
Unigene18896_All	430	1	25	0.1093	2.8052	4.68174	Up	3.00742e-07	8.21849e-06
Unigene42940_All	848	3	75	0.1663	4.2674	4.6815	Up	1.04781e-19	8.84376e-18
Unigene11673_All	1261	1	25	0.0373	0.9566	4.68067	Up	3.00742e-07	8.22035e-06
Unigene29718_All	1899	1	25	0.0248	0.6352	4.6788	Up	3.00742e-07	8.21664e-06
Unigene30542_All	486	3	72	0.2902	7.1481	4.62244	Up	7.76154e-19	6.17622e-17
Unigene30875_All	1616	27	645	0.7855	19.2581	4.61571	Up	2.01802e-158	1.48028e-155
CL1073.Contig3_All	480	1	23	0.0979	2.312	4.56169	Up	1.14651e-06	2.80958e-05
CL3221.Contig3_All	2014	3	69	0.07	1.653	4.56159	Up	5.72248e-18	4.30192e-16
Unigene2814_All	462	1	23	0.1018	2.402	4.56043	Up	1.14651e-06	2.81072e-05
Unigene4780_All	2141	1	23	0.022	0.5183	4.55821	Up	1.14651e-06	2.81015e-05
Unigene15541_All	602	1	22	0.0781	1.7633	4.49681	Up	2.2337e-06	5.13001e-05
CL2796.Contig4_All	1554	1	22	0.0303	0.6831	4.49471	Up	2.2337e-06	5.13098e-05
Unigene49_All	2662	1	22	0.0177	0.3988	4.49384	Up	2.2337e-06	5.13196e-05
CL14398.Contig3_All	823	250	5409	14.2814	317.112	4.47278	Up	0	0
CL5176.Contig8_All	689	1	21	0.0682	1.4706	4.43049	Up	4.34486e-06	9.36381e-05
CL132.Contig3_All	2000	2	42	0.047	1.0132	4.43011	Up	3.44334e-11	1.57743e-09
CL15365.Contig2_All	1655	1	21	0.0284	0.6122	4.43004	Up	4.34486e-06	9.37048e-05
CL1610.Contig2_All	1122	1	21	0.0419	0.9031	4.42986	Up	4.34486e-06	9.36548e-05
CL2856.Contig3_All	882	1	21	0.0533	1.1488	4.42985	Up	4.34486e-06	9.36881e-05
Unigene7062_All	498	1	21	0.0944	2.0346	4.42981	Up	4.34486e-06	9.36214e-05
CL1862.Contig9_All	995	2	42	0.0945	2.0367	4.42978	Up	3.44334e-11	1.57803e-09
Unigene37432_All	302	1	21	0.1557	3.3551	4.42951	Up	4.34486e-06	9.37382e-05
Unigene9665_All	1264	1	21	0.0372	0.8016	4.42951	Up	4.34486e-06	9.37215e-05
Unigene7721_All	504	1	21	0.0933	2.0104	4.42946	Up	4.34486e-06	9.36047e-05
Unigene16243_All	797	1	21	0.059	1.2713	4.42945	Up	4.34486e-06	9.36714e-05
CL4340.Contig3_All	803	1	20	0.0585	1.2017	4.3605	Up	8.43666e-06	0.000171616
Unigene27560_All	2126	1	20	0.0221	0.4539	4.36026	Up	8.43666e-06	0.000171645
CL8707.Contig2_All	1152	1	20	0.0408	0.8377	4.35979	Up	8.43666e-06	0.000171674
CL6190.Contig6_All	1175	12	235	0.4801	9.65	4.32912	Up	2.15034e-56	5.37732e-54
Unigene25035_All	910	2	39	0.1033	2.0679	4.32325	Up	2.49946e-10	1.04352e-08
Unigene8598_All	2758	1	19	0.017	0.3324	4.28931	Up	1.63509e-05	0.00030946
CL18085.Contig3_All	2762	1	19	0.017	0.3319	4.28714	Up	1.63509e-05	0.000309654
CL8538.Contig3_All	528	1	19	0.089	1.7363	4.28607	Up	1.63509e-05	0.000309702
Unigene581_All	488	1	19	0.0963	1.8786	4.28598	Up	1.63509e-05	0.000309557
CL13935.Contig2_All	565	1	19	0.0832	1.6226	4.28558	Up	1.63509e-05	0.000309751
Unigene11671_All	1114	1	19	0.0422	0.8229	4.2854	Up	1.63509e-05	0.000309606
Unigene11558_All	675	1	19	0.0697	1.3581	4.28429	Up	1.63509e-05	0.000309799
CL8393.Contig1_All	2140	1	19	0.022	0.4284	4.28338	Up	1.63509e-05	0.000309509
Unigene22190_All	1289	2	37	0.0729	1.385	4.24782	Up	9.31946e-10	3.63507e-08
Unigene49113_All	1842	1	18	0.0255	0.4715	4.20869	Up	3.16238e-05	0.00055351
CL11490.Contig1_All	517	1	18	0.0909	1.6799	4.20795	Up	3.16238e-05	0.00055367
CL15540.Contig2_All	572	1	18	0.0822	1.5184	4.20727	Up	3.16238e-05	0.00055319
CL2127.Contig2_All	437	1	18	0.1076	1.9874	4.20713	Up	3.16238e-05	0.00055343
CL2842.Contig2_All	295	1	18	0.1594	2.9441	4.2071	Up	3.16238e-05	0.00055327
CL4613.Contig3_All	950	1	18	0.0495	0.9142	4.20701	Up	3.16238e-05	0.00055335
CL14962.Contig7_All	564	1	18	0.0834	1.5399	4.20665	Up	3.16238e-05	0.00055359
CL14398.Contig2_All	1412	87	1521	2.8968	51.9745	4.16527	Up	0	0
CL13407.Contig4_All	1017	1	17	0.0462	0.8065	4.12571	Up	6.10232e-05	0.00098675
Unigene37584_All	308	1	17	0.1526	2.6631	4.12528	Up	6.10232e-05	0.000987673
CL9362.Contig3_All	281	2	34	0.3346	5.8381	4.12499	Up	6.64766e-09	2.3471e-07
Unigene3334_All	533	1	17	0.0882	1.5389	4.12498	Up	6.10232e-05	0.000987145
CL105.Contig2_All	1215	1	17	0.0387	0.6751	4.1247	Up	6.10232e-05	0.000986618
CL2116.Contig1_All	356	1	17	0.1321	2.3041	4.1245	Up	6.10232e-05	0.000987938
Unigene32441_All	529	1	17	0.0889	1.5506	4.1245	Up	6.10232e-05	0.000987277
Unigene2920_All	494	1	17	0.0952	1.6604	4.12443	Up	6.10232e-05	0.000986881
CL12173.Contig1_All	749	1	17	0.0628	1.0951	4.12415	Up	6.10232e-05	0.000987541
Unigene26587_All	2100	1	17	0.0224	0.3906	4.12412	Up	6.10232e-05	0.000987409
CL1823.Contig1_All	1079	1	17	0.0436	0.7602	4.12398	Up	6.10232e-05	0.000987805
CL1128.Contig20_All	1606	1	17	0.0293	0.5107	4.1235	Up	6.10232e-05	0.000987013
CL13763.Contig3_All	619	2	33	0.1519	2.5723	4.08187	Up	1.27615e-08	4.34722e-07
Unigene19437_All	1147	5	81	0.2049	3.4074	4.05568	Up	1.85403e-19	1.5412e-17
CL1351.Contig8_All	795	2	32	0.1183	1.9421	4.0371	Up	2.44616e-08	8.02565e-07
CL17798.Contig1_All	301	5	79	0.781	12.6636	4.01922	Up	6.76778e-19	5.4032e-17
CL7724.Contig7_All	1910	10	156	0.2461	3.9408	4.00117	Up	5.89598e-36	9.14882e-34
CL3734.Contig2_All	746	6	91	0.3781	5.8857	3.96037	Up	2.30298e-21	2.12776e-19
CL9635.Contig4_All	1135	5	75	0.2071	3.1883	3.94439	Up	8.94042e-18	6.6672e-16
CL14005.Contig2_All	1449	11	163	0.3569	5.4277	3.92675	Up	5.18342e-37	8.29848e-35
Unigene30292_All	934	49	717	2.4665	37.0398	3.90854	Up	3.43142e-157	2.48692e-154
CL2289.Contig12_All	1412	2	29	0.0666	0.991	3.89529	Up	1.70587e-07	4.86147e-06
CL11904.Contig2_All	2508	2	29	0.0375	0.5579	3.89504	Up	1.70587e-07	4.86261e-06
CL8738.Contig1_All	1339	2	28	0.0702	1.009	3.84531	Up	3.2473e-07	8.8163e-06
Unigene31395_All	764	5	70	0.3077	4.4208	3.84471	Up	2.2121e-16	1.51349e-14
Unigene21165_All	874	2	28	0.1076	1.5458	3.8446	Up	3.2473e-07	8.81827e-06
Unigene27585_All	486	2	28	0.1935	2.7798	3.84458	Up	3.2473e-07	8.82025e-06
CL12835.Contig2_All	705	2	28	0.1334	1.9163	3.84449	Up	3.2473e-07	8.82223e-06
CL1558.Contig5_All	2873	4	56	0.0655	0.9405	3.84386	Up	2.42476e-13	1.34869e-11
CL8564.Contig2_All	762	14	193	0.8638	12.2208	3.8225	Up	1.03507e-42	1.91849e-40
CL3221.Contig2_All	1913	10	137	0.2458	3.4554	3.8133	Up	1.15207e-30	1.54075e-28
CL701.Contig31_All	447	2	27	0.2104	2.9144	3.79199	Up	6.16914e-07	1.59545e-05
CL4525.Contig2_All	1336	2	27	0.0704	0.9751	3.7919	Up	6.16914e-07	1.59477e-05
CL4813.Contig3_All	1537	2	27	0.0612	0.8476	3.79178	Up	6.16914e-07	1.59511e-05
CL6976.Contig2_All	1421	5	67	0.1654	2.275	3.78184	Up	1.50081e-15	9.72939e-14
CL3889.Contig4_All	1212	6	80	0.2327	3.1848	3.77466	Up	2.63512e-18	2.01603e-16
CL1490.Contig4_All	1068	9	118	0.3962	5.331	3.75011	Up	2.8696e-26	3.22785e-24
CL9634.Contig1_All	699	2	26	0.1345	1.7947	3.73806	Up	1.16949e-06	2.86127e-05
Unigene1479_All	825	6	78	0.3419	4.5618	3.73796	Up	9.38784e-18	6.99654e-16
CL10979.Contig2_All	349	9	117	1.2124	16.1755	3.73787	Up	5.40928e-26	6.02301e-24
Unigene30290_All	829	31	398	1.7581	23.1646	3.71983	Up	1.10965e-84	4.11976e-82
CL7724.Contig1_All	984	3	38	0.1433	1.8633	3.70075	Up	3.5115e-09	1.28246e-07
CL12116.Contig1_All	1129	3	38	0.1249	1.624	3.70071	Up	3.5115e-09	1.28285e-07
Unigene21040_All	374	2	25	0.2514	3.2253	3.68138	Up	2.21194e-06	5.08872e-05
CL1260.Contig1_All	1096	2	25	0.0858	1.1006	3.68117	Up	2.21194e-06	5.08776e-05
Unigene15214_All	823	2	25	0.1143	1.4657	3.68069	Up	2.21194e-06	5.08969e-05
CL5437.Contig2_All	1242	5	62	0.1893	2.4086	3.66945	Up	3.57828e-14	2.11367e-12
CL9831.Contig3_All	649	4	49	0.2898	3.6429	3.65196	Up	2.08054e-11	9.77539e-10
CL7724.Contig6_All	2285	11	134	0.2263	2.8295	3.64424	Up	5.26438e-29	6.58908e-27
CL11108.Contig3_All	493	2	24	0.1907	2.3489	3.62261	Up	4.17336e-06	9.03119e-05
CL10923.Contig1_All	574	7	84	0.5733	7.061	3.62251	Up	1.38533e-18	1.07896e-16
CL1862.Contig5_All	1363	3	36	0.1035	1.2744	3.62212	Up	1.24569e-08	4.25301e-07
CL13675.Contig2_All	549	127	1493	10.8759	131.215	3.59273	Up	2e-304	2.91646e-301
Unigene9727_All	1111	2	23	0.0846	0.9989	3.56161	Up	7.85334e-06	0.000160641
Unigene654_All	1073	2	23	0.0876	1.0342	3.56144	Up	7.85334e-06	0.000160668
Unigene390_All	2187	2	23	0.043	0.5074	3.56071	Up	7.85334e-06	0.000160533
Unigene5459_All	1186	2	23	0.0793	0.9357	3.56065	Up	7.85334e-06	0.000160614
CL8001.Contig1_All	2133	2	23	0.0441	0.5203	3.56049	Up	7.85334e-06	0.000160587
CL12910.Contig1_All	849	2	23	0.1108	1.3071	3.56034	Up	7.85334e-06	0.00016056
Unigene4929_All	1739	2	23	0.0541	0.6382	3.56031	Up	7.85334e-06	0.000160723
CL249.Contig14_All	1160	2	23	0.0811	0.9567	3.56029	Up	7.85334e-06	0.000160695
CL13259.Contig2_All	1415	2	23	0.0665	0.7843	3.55998	Up	7.85334e-06	0.00016075
CL11204.Contig1_All	1769	2	23	0.0532	0.6273	3.55966	Up	7.85334e-06	0.000160505
Unigene24777_All	798	3	34	0.1767	2.0558	3.54033	Up	4.3861e-08	1.37851e-06
CL13675.Contig1_All	618	507	5661	38.5702	441.978	3.51842	Up	0	0
CL2280.Contig2_All	542	3	33	0.2602	2.9377	3.49699	Up	8.20522e-08	2.47533e-06
CL12593.Contig2_All	541	2	22	0.1738	1.9621	3.4969	Up	1.47364e-05	0.00028284
Unigene10123_All	500	2	22	0.1881	2.123	3.49653	Up	1.47364e-05	0.000282885
CL3769.Contig2_All	868	8	87	0.4333	4.8361	3.48041	Up	1.288e-18	1.00834e-16
Unigene31164_All	1211	6	65	0.2329	2.5898	3.47506	Up	3.30428e-14	1.95563e-12
Unigene18115_All	958	4	43	0.1963	2.1657	3.4637	Up	8.95398e-10	3.50381e-08
Unigene12368_All	1329	82	877	2.9008	31.8398	3.45631	Up	1.43821e-173	1.16826e-170
CL1823.Contig2_All	1051	3	32	0.1342	1.4691	3.45248	Up	1.53163e-07	4.40538e-06
CL9726.Contig1_All	498	2	21	0.1888	2.0346	3.42981	Up	2.75676e-05	0.000490098
Unigene1771_All	827	2	21	0.1137	1.2252	3.42971	Up	2.75676e-05	0.000489811
CL5822.Contig1_All	451	2	21	0.2085	2.2467	3.42969	Up	2.75676e-05	0.00049017
Unigene32075_All	681	2	21	0.1381	1.4879	3.42949	Up	2.75676e-05	0.000490242
Unigene15904_All	667	2	21	0.141	1.5191	3.42945	Up	2.75676e-05	0.000489954
CL10751.Contig1_All	1206	2	21	0.078	0.8402	3.42919	Up	2.75676e-05	0.000490314
Unigene28493_All	956	2	21	0.0984	1.0599	3.42913	Up	2.75676e-05	0.000489882
CL760.Contig6_All	2531	2	21	0.0372	0.4003	3.42771	Up	2.75676e-05	0.000490026
Unigene579_All	2028	3	31	0.0695	0.7375	3.40756	Up	2.85246e-07	7.83039e-06
Unigene5752_All	831	8	82	0.4526	4.7611	3.39499	Up	2.8355e-17	2.05749e-15
CL5989.Contig5_All	2222	5	51	0.1058	1.1074	3.38776	Up	3.45474e-11	1.58146e-09
Unigene24648_All	789	6	61	0.3575	3.7303	3.38328	Up	3.92516e-13	2.1419e-11
CL13038.Contig1_All	1817	2	20	0.0517	0.5311	3.36075	Up	5.14006e-05	0.000847686
CL17753.Contig4_All	2715	2	20	0.0346	0.3554	3.3606	Up	5.14006e-05	0.00084838
CL11845.Contig4_All	1102	2	20	0.0853	0.8757	3.35982	Up	5.14006e-05	0.000848033
Unigene18771_All	520	2	20	0.1808	1.8558	3.35957	Up	5.14006e-05	0.000848611
CL9196.Contig2_All	657	2	20	0.1431	1.4688	3.35954	Up	5.14006e-05	0.000847571
Unigene9740_All	695	2	20	0.1353	1.3885	3.35929	Up	5.14006e-05	0.000847802
Unigene25311_All	615	2	20	0.1529	1.5691	3.35928	Up	5.14006e-05	0.000847917
Unigene6339_All	858	2	20	0.1096	1.1247	3.35922	Up	5.14006e-05	0.000848495
CL13996.Contig2_All	372	2	20	0.2528	2.5941	3.35917	Up	5.14006e-05	0.000848148
CL8731.Contig2_All	1219	4	40	0.1543	1.5833	3.35912	Up	5.74086e-09	2.04423e-07
CL1640.Contig14_All	1334	2	20	0.0705	0.7234	3.3591	Up	5.14006e-05	0.000848264
CL658.Contig5_All	3315	36	359	0.5106	5.2252	3.35522	Up	3.40486e-70	1.05397e-67
Unigene45134_All	289	19	189	3.0909	31.5544	3.35174	Up	1.23147e-37	2.01418e-35
CL6190.Contig4_All	1119	11	109	0.4622	4.6999	3.34604	Up	2.91166e-22	2.81475e-20
CL13763.Contig2_All	612	13	128	0.9987	10.0915	3.33695	Up	7.58516e-26	8.39172e-24
Unigene30686_All	1933	57	556	1.3864	13.8784	3.32343	Up	6.7339e-107	3.20876e-104
Unigene1667_All	633	3	29	0.2228	2.2105	3.31055	Up	9.82018e-07	2.43858e-05
Unigene55_All	2874	3	29	0.0491	0.4869	3.30983	Up	9.82018e-07	2.43808e-05
Unigene22089_All	986	20	190	0.9536	9.2976	3.2854	Up	3.58854e-37	5.79882e-35
CL2289.Contig5_All	1847	12	113	0.3055	2.9519	3.2724	Up	1.3416e-22	1.31161e-20
Unigene18077_All	2051	5	47	0.1146	1.1057	3.27028	Up	4.0231e-10	1.63949e-08
Unigene30838_All	1419	8	75	0.2651	2.5502	3.266	Up	2.05842e-15	1.32098e-13
CL8820.Contig2_All	618	3	28	0.2282	2.1861	3.25999	Up	1.81477e-06	4.26003e-05
CL3527.Contig2_All	1357	6	56	0.2079	1.9912	3.25968	Up	8.394e-12	4.1165e-10
Unigene24665_All	1083	4	37	0.1736	1.6484	3.24723	Up	3.61472e-08	1.15435e-06
CL8185.Contig10_All	1974	26	239	0.6192	5.8418	3.23794	Up	8.97286e-46	1.78915e-43
CL8721.Contig1_All	1071	8	73	0.3512	3.2887	3.22715	Up	6.92964e-15	4.30552e-13
CL1043.Contig9_All	2373	3	27	0.0594	0.549	3.20827	Up	3.34396e-06	7.38827e-05
Unigene22557_All	2014	3	27	0.07	0.6468	3.20789	Up	3.34396e-06	7.38962e-05
Unigene24775_All	970	3	27	0.1454	1.343	3.20736	Up	3.34396e-06	7.38692e-05
CL1251.Contig1_All	1378	3	27	0.1024	0.9454	3.20671	Up	3.34396e-06	7.38558e-05
CL12250.Contig2_All	1643	27	239	0.7726	7.0187	3.18341	Up	4.51438e-45	8.86995e-43
CL8185.Contig11_All	1634	20	176	0.5755	5.197	3.17479	Up	1.68457e-33	2.43014e-31
CL18100.Contig8_All	4155	3	26	0.0339	0.3019	3.15471	Up	6.14268e-06	0.000128672
Unigene37149_All	597	3	26	0.2363	2.1013	3.15259	Up	6.14268e-06	0.00012865
CL605.Contig5_All	1692	3	26	0.0834	0.7414	3.15213	Up	6.14268e-06	0.000128628
Unigene3589_All	1921	32	276	0.7832	6.9323	3.14588	Up	3.01622e-51	6.81086e-49
CL16743.Contig4_All	4824	13	112	0.1267	1.1202	3.14427	Up	1.22002e-21	1.14379e-19
CL9635.Contig3_All	1657	37	317	1.0498	9.2307	3.13633	Up	1.85008e-58	4.84677e-56
CL7780.Contig2_All	730	4	34	0.2576	2.2473	3.12499	Up	2.22916e-07	6.24541e-06
CL4319.Contig1_All	1212	4	34	0.1552	1.3535	3.12449	Up	2.22916e-07	6.24686e-06
CL158.Contig2_All	706	9	76	0.5993	5.194	3.1155	Up	5.49452e-15	3.43856e-13
Unigene17944_All	1377	5	42	0.1707	1.4717	3.10795	Up	8.29828e-09	2.89609e-07
CL13295.Contig2_All	1308	525	4377	18.8705	161.46	3.09697	Up	0	0
Unigene20657_All	1319	3	25	0.1069	0.9145	3.09672	Up	1.12465e-05	0.000222746
CL8010.Contig1_All	896	3	25	0.1574	1.3463	3.09649	Up	1.12465e-05	0.000222783
CL3894.Contig2_All	836	3	25	0.1687	1.4429	3.09644	Up	1.12465e-05	0.000222637
Unigene28374_All	422	3	25	0.3342	2.8584	3.09642	Up	1.12465e-05	0.000222601
CL17753.Contig3_All	4065	3	25	0.0347	0.2967	3.096	Up	1.12465e-05	0.000222673
CL1681.Contig20_All	1242	3	25	0.1136	0.9712	3.09581	Up	1.12465e-05	0.00022271
Unigene26610_All	4161	4	33	0.0452	0.3827	3.08182	Up	4.06676e-07	1.08512e-05
Unigene18454_All	990	118	968	5.6038	47.1776	3.07362	Up	1.10893e-171	8.71541e-169
Unigene520_All	1429	5	41	0.1645	1.3844	3.0731	Up	1.51043e-08	5.10078e-07
CL6935.Contig4_All	433	6	49	0.6515	5.4601	3.06709	Up	5.70922e-10	2.28129e-08
CL10733.Contig2_All	2200	8	65	0.171	1.4256	3.0595	Up	8.43976e-13	4.48022e-11
CL4820.Contig6_All	4205	4	32	0.0447	0.3672	3.03822	Up	7.39832e-07	1.88435e-05
CL11904.Contig1_All	2736	4	32	0.0687	0.5643	3.03808	Up	7.39832e-07	1.88355e-05
CL698.Contig2_All	2041	4	32	0.0921	0.7565	3.03807	Up	7.39832e-07	1.88474e-05
CL1308.Contig1_All	1073	3	24	0.1314	1.0792	3.03793	Up	2.05186e-05	0.000378571
Unigene7968_All	1472	3	24	0.0958	0.7867	3.03772	Up	2.05186e-05	0.000378341
CL4009.Contig3_All	1989	3	24	0.0709	0.5822	3.03766	Up	2.05186e-05	0.000378745
CL17620.Contig14_All	991	3	24	0.1423	1.1685	3.03765	Up	2.05186e-05	0.000378802
CL3006.Contig1_All	787	3	24	0.1792	1.4714	3.03755	Up	2.05186e-05	0.000378514
Unigene15532_All	931	4	32	0.202	1.6584	3.03736	Up	7.39832e-07	1.88395e-05
CL5293.Contig1_All	2574	3	24	0.0548	0.4499	3.03736	Up	2.05186e-05	0.000378456
Unigene176_All	729	3	24	0.1935	1.5885	3.03726	Up	2.05186e-05	0.000378629
CL7357.Contig1_All	1866	3	24	0.0756	0.6206	3.03721	Up	2.05186e-05	0.000378283
Unigene12553_All	782	3	24	0.1804	1.4808	3.03711	Up	2.05186e-05	0.000378687
CL2448.Contig21_All	3259	3	24	0.0433	0.3553	3.0366	Up	2.05186e-05	0.000378398
CL3179.Contig1_All	1284	33	260	1.2083	9.7702	3.01541	Up	1.84642e-46	3.78135e-44
Unigene14893_All	3780	11	86	0.1368	1.0977	3.00434	Up	2.97482e-16	2.01371e-14
Unigene8783_All	1584	11	86	0.3265	2.6196	3.00419	Up	2.97482e-16	2.01484e-14
Unigene3675_All	829	4	31	0.2268	1.8043	2.99195	Up	1.34191e-06	3.24248e-05
CL11197.Contig3_All	366	4	31	0.5138	4.0867	2.99166	Up	1.34191e-06	3.24183e-05
CL605.Contig6_All	826	4	31	0.2277	1.8108	2.99142	Up	1.34191e-06	3.24054e-05
Unigene11461_All	2574	4	31	0.0731	0.5811	2.99084	Up	1.34191e-06	3.24119e-05
CL6280.Contig10_All	884	7	54	0.3723	2.9474	2.98491	Up	1.29273e-10	5.56215e-09
Unigene18008_All	1101	49	376	2.0924	16.4777	2.97728	Up	1.16846e-65	3.41601e-63
Unigene3916_All	1719	3	23	0.082	0.6456	2.97694	Up	3.72932e-05	0.00064179
Unigene22641_All	1203	3	23	0.1172	0.9225	2.97658	Up	3.72932e-05	0.000641881
CL1308.Contig2_All	1191	3	23	0.1184	0.9318	2.97635	Up	3.72932e-05	0.000642246
CL739.Contig14_All	1333	3	23	0.1058	0.8325	2.97611	Up	3.72932e-05	0.000642064
CL8347.Contig1_All	1287	3	23	0.1096	0.8623	2.97594	Up	3.72932e-05	0.000641972
CL2247.Contig9_All	2678	3	23	0.0527	0.4144	2.97515	Up	3.72932e-05	0.000642155
CL1211.Contig4_All	1452	12	91	0.3885	3.0239	2.96042	Up	6.8358e-17	4.83835e-15
CL13265.Contig2_All	1204	12	91	0.4686	3.6468	2.9602	Up	6.8358e-17	4.83552e-15
CL1211.Contig2_All	3150	27	204	0.403	3.1248	2.95491	Up	4.5461e-36	7.08144e-34
CL15226.Contig3_All	1133	14	105	0.5809	4.4715	2.9444	Up	3.46024e-19	2.82403e-17
CL803.Contig8_All	6236	4	30	0.0302	0.2321	2.94213	Up	2.42634e-06	5.53046e-05
CL593.Contig2_All	1626	30	224	0.8674	6.647	2.93793	Up	3.10432e-39	5.24756e-37
CL5402.Contig2_All	953	77	574	3.7987	29.0613	2.93552	Up	5.8411e-98	2.55222e-95
CL11978.Contig1_All	627	43	320	3.2243	24.6251	2.93307	Up	2.7019e-55	6.60645e-53
Unigene24602_All	1334	7	52	0.2467	1.8808	2.93052	Up	4.18858e-10	1.70348e-08
Unigene19417_All	704	5	37	0.3339	2.5359	2.92501	Up	1.61771e-07	4.62877e-06
CL16716.Contig1_All	1242	60	443	2.2712	17.2099	2.92171	Up	1.25434e-75	4.13668e-73
CL9635.Contig2_All	1737	16	118	0.4331	3.2778	2.91996	Up	3.16028e-21	2.89771e-19
CL1581.Contig2_All	1862	130	957	3.2824	24.7987	2.91744	Up	3.99498e-161	3.00326e-158
Unigene14897_All	1804	31	227	0.8079	6.0714	2.90978	Up	2.29812e-39	3.91207e-37
Unigene15414_All	916	7	51	0.3593	2.6864	2.90241	Up	7.51652e-10	2.96431e-08
CL3317.Contig2_All	760	4	29	0.2474	1.8411	2.89565	Up	4.37258e-06	9.4068e-05
Unigene15754_All	396	4	29	0.4749	3.5334	2.89536	Up	4.37258e-06	9.40847e-05
CL15291.Contig3_All	1142	4	29	0.1647	1.2253	2.89522	Up	4.37258e-06	9.41014e-05
CL3982.Contig1_All	1001	5	36	0.2348	1.7353	2.88568	Up	2.90696e-07	7.97096e-06
Unigene8960_All	247	10	72	1.9034	14.0647	2.88543	Up	2.5349e-13	1.40672e-11
CL7971.Contig2_All	1464	5	36	0.1606	1.1865	2.88517	Up	2.90696e-07	7.96915e-06
CL5710.Contig3_All	1978	277	1991	6.5839	48.567	2.88296	Up	0	0
CL8912.Contig1_All	410	6	43	0.688	5.0604	2.87877	Up	1.96605e-08	6.54268e-07
Unigene1509_All	1333	119	849	4.1971	30.7308	2.87222	Up	7.19322e-141	4.63094e-138
CL11786.Contig5_All	1540	16	114	0.4885	3.5717	2.87018	Up	3.21304e-20	2.79371e-18
CL5774.Contig1_All	2530	8	57	0.1487	1.0871	2.87001	Up	9.29882e-11	4.07039e-09
CL3127.Contig1_All	1202	106	752	4.146	30.1863	2.8641	Up	1.2955e-124	7.327e-122
Unigene12340_All	868	26	184	1.4083	10.2281	2.86051	Up	1.17955e-31	1.64285e-29
CL5402.Contig1_All	964	109	768	5.316	38.4397	2.85418	Up	8.99128e-127	5.23193e-124
Unigene13967_All	5258	5	35	0.0447	0.3212	2.84513	Up	5.20834e-07	1.36269e-05
CL14904.Contig8_All	1061	4	28	0.1772	1.2733	2.84512	Up	7.85222e-06	0.000160754
Unigene25094_All	527	4	28	0.3568	2.5636	2.84498	Up	7.85222e-06	0.000160781
CL14542.Contig2_All	756	5	35	0.3109	2.2338	2.84498	Up	5.20834e-07	1.3621e-05
CL3986.Contig2_All	2619	8	56	0.1436	1.0317	2.8449	Up	1.65996e-10	7.05195e-09
CL8185.Contig5_All	1674	10	70	0.2809	2.0176	2.84451	Up	8.07016e-13	4.29721e-11
CL17228.Contig2_All	2109	5	35	0.1115	0.8007	2.84422	Up	5.20834e-07	1.3624e-05
CL1211.Contig1_All	2939	67	467	1.0718	7.6668	2.83859	Up	2.5147e-77	8.38462e-75
Unigene14367_All	5444	1035	7136	8.9383	63.246	2.8229	Up	0	0
CL2289.Contig9_All	2289	17	117	0.3492	2.4662	2.82016	Up	2.29442e-20	2.01232e-18
CL13351.Contig2_All	911	20	137	1.0322	7.256	2.81345	Up	1.49538e-23	1.5171e-21
CL15509.Contig2_All	428	5	34	0.5492	3.8329	2.80303	Up	9.30288e-07	2.31917e-05
CL2057.Contig10_All	1160	10	68	0.4053	2.8284	2.80292	Up	2.55228e-12	1.30783e-10
CL12514.Contig1_All	934	4	27	0.2013	1.3948	2.79264	Up	1.40483e-05	0.000270879
CL1984.Contig5_All	279	4	27	0.674	4.6693	2.79239	Up	1.40483e-05	0.00027075
Unigene23299_All	309	4	27	0.6086	4.216	2.79231	Up	1.40483e-05	0.000270836
CL340.Contig8_All	923	8	54	0.4075	2.8229	2.79231	Up	5.25726e-10	2.11045e-08
Unigene21166_All	1026	12	81	0.5499	3.8092	2.79225	Up	2.24096e-14	1.34272e-12
CL10852.Contig1_All	2476	4	27	0.076	0.5261	2.79127	Up	1.40483e-05	0.000270793
CL11978.Contig3_All	731	22	148	1.4149	9.7688	2.78748	Up	4.2851e-25	4.61012e-23
CL8185.Contig6_All	1465	7	47	0.2246	1.5479	2.78488	Up	7.62414e-09	2.67238e-07
Unigene11839_All	3069	35	234	0.5362	3.6789	2.77843	Up	1.0887e-38	1.8125e-36
Unigene28799_All	2172	17	113	0.368	2.5102	2.77002	Up	2.25534e-19	1.86201e-17
CL176.Contig1_All	1044	11	73	0.4954	3.3738	2.76771	Up	5.62912e-13	3.03614e-11
Unigene13954_All	5564	5	33	0.0422	0.2862	2.76171	Up	1.65625e-06	3.92137e-05
CL1533.Contig3_All	1276	5	33	0.1842	1.2478	2.76004	Up	1.65625e-06	3.92214e-05
CL2289.Contig18_All	1928	15	99	0.3658	2.4776	2.75982	Up	4.42864e-17	3.17919e-15
Unigene26842_All	2181	5	33	0.1078	0.7301	2.75974	Up	1.65625e-06	3.92061e-05
CL3220.Contig1_All	1191	5	33	0.1974	1.3369	2.7597	Up	1.65625e-06	3.92291e-05
CL11674.Contig3_All	507	7	46	0.6491	4.3777	2.75366	Up	1.35254e-08	4.59449e-07
CL9498.Contig1_All	745	20	131	1.2621	8.4842	2.74895	Up	4.56332e-22	4.38343e-20
CL9386.Contig2_All	1820	11	72	0.2842	1.9088	2.74769	Up	9.95158e-13	5.26659e-11
CL4631.Contig1_All	814	13	85	0.7508	5.0384	2.74647	Up	8.77014e-15	5.41293e-13
CL11978.Contig4_All	643	32	209	2.3398	15.6831	2.74475	Up	2.75338e-34	4.05907e-32
CL4768.Contig2_All	5077	4	26	0.037	0.2471	2.7395	Up	2.5034e-05	0.00045075
CL17527.Contig2_All	742	4	26	0.2534	1.6907	2.73813	Up	2.5034e-05	0.000450616
CL11311.Contig4_All	560	4	26	0.3358	2.2402	2.73795	Up	2.5034e-05	0.000450482
Unigene12700_All	996	4	26	0.1888	1.2595	2.73792	Up	2.5034e-05	0.000450817
Unigene31076_All	763	6	39	0.3697	2.4662	2.73786	Up	1.98065e-07	5.58928e-06
Unigene6586_All	583	4	26	0.3226	2.1518	2.73773	Up	2.5034e-05	0.000450683
CL5409.Contig5_All	1070	4	26	0.1758	1.1724	2.73746	Up	2.5034e-05	0.000450549
CL1419.Contig4_All	2051	1734	11194	39.748	263.339	2.72797	Up	0	0
Unigene21636_All	1101	9	58	0.3843	2.5418	2.72555	Up	2.0262e-10	8.54485e-09
CL6130.Contig1_All	894	7	45	0.3681	2.4287	2.72201	Up	2.39328e-08	7.86922e-07
CL14108.Contig3_All	5316	7	45	0.0619	0.4084	2.72197	Up	2.39328e-08	7.86708e-07
Unigene11149_All	2472	5	32	0.0951	0.6246	2.71542	Up	2.93866e-06	6.59268e-05
CL9837.Contig2_All	1083	5	32	0.2171	1.4257	2.71524	Up	2.93866e-06	6.59145e-05
CL9635.Contig1_All	2038	80	510	1.8455	12.0743	2.70986	Up	2.8396e-80	9.90448e-78
CL1260.Contig4_All	1030	8	51	0.3652	2.3891	2.70971	Up	2.9148e-09	1.07067e-07
CL5238.Contig3_All	651	8	51	0.5778	3.7799	2.70971	Up	2.9148e-09	1.071e-07
CL16770.Contig3_All	1941	11	70	0.2664	1.7401	2.7075	Up	3.09422e-12	1.5709e-10
CL11470.Contig2_All	2415	6	38	0.1168	0.7592	2.70044	Up	3.50344e-07	9.47346e-06
CL6067.Contig6_All	232	6	38	1.2159	7.903	2.70038	Up	3.50344e-07	9.47134e-06
CL10830.Contig1_All	1150	6	38	0.2453	1.5943	2.7003	Up	3.50344e-07	9.46922e-06
Unigene8991_All	1603	6	38	0.176	1.1438	2.70019	Up	3.50344e-07	9.46711e-06
CL17488.Contig5_All	884	215	1358	11.4345	74.1214	2.6965	Up	1.21399e-209	1.17546e-206
CL15631.Contig3_All	765	7	44	0.4302	2.7752	2.68951	Up	4.2236e-08	1.32951e-06
CL361.Contig2_All	2173	7	44	0.1515	0.977	2.68904	Up	4.2236e-08	1.3302e-06
Unigene26784_All	2479	7	44	0.1328	0.8564	2.68903	Up	4.2236e-08	1.32985e-06
CL9610.Contig1_All	2214	15	94	0.3185	2.0485	2.6852	Up	7.48464e-16	4.94211e-14
CL2634.Contig2_All	1339	4	25	0.1404	0.9009	2.68182	Up	4.44216e-05	0.0007508
Unigene12566_All	1762	4	25	0.1067	0.6846	2.6817	Up	4.44216e-05	0.000750486
CL1782.Contig2_All	839	4	25	0.2241	1.4377	2.68155	Up	4.44216e-05	0.00075143
CL3889.Contig3_All	1080	4	25	0.1741	1.1169	2.68151	Up	4.44216e-05	0.00075059
Unigene6096_All	1066	4	25	0.1764	1.1316	2.68144	Up	4.44216e-05	0.000751535
Unigene9735_All	354	4	25	0.5312	3.4075	2.68139	Up	4.44216e-05	0.000751325
CL7064.Contig2_All	1328	4	25	0.1416	0.9083	2.68135	Up	4.44216e-05	0.00075101
Unigene9990_All	537	4	25	0.3502	2.2463	2.6813	Up	4.44216e-05	0.000750695
Unigene29713_All	2125	4	25	0.0885	0.5676	2.68113	Up	4.44216e-05	0.00075122
CL6736.Contig1_All	826	4	25	0.2277	1.4603	2.68106	Up	4.44216e-05	0.000750381
CL6793.Contig2_All	1073	4	25	0.1753	1.1242	2.681	Up	4.44216e-05	0.000750905
CL1862.Contig11_All	1123	4	25	0.1675	1.0741	2.6809	Up	4.44216e-05	0.000751115
CL3338.Contig3_All	3068	420	2623	6.4361	41.2514	2.68018	Up	0	0
Unigene15501_All	1797	9	56	0.2355	1.5036	2.67462	Up	6.28378e-10	2.49933e-08
CL17882.Contig12_All	3440	5	31	0.0683	0.4348	2.67039	Up	5.19524e-06	0.000110296
CL9711.Contig2_All	991	5	31	0.2372	1.5093	2.6697	Up	5.19524e-06	0.000110315
CL967.Contig2_All	965	5	31	0.2436	1.55	2.66968	Up	5.19524e-06	0.000110334
Unigene30200_All	1452	5	31	0.1619	1.0301	2.66961	Up	5.19524e-06	0.000110354
CL17252.Contig2_All	717	12	74	0.7869	4.9798	2.66184	Up	1.18452e-12	6.23332e-11
CL630.Contig12_All	1412	6	37	0.1998	1.2643	2.66171	Up	6.17762e-07	1.59628e-05
Unigene1708_All	704	20	123	1.3356	8.43	2.65804	Up	4.11932e-20	3.55616e-18
CL10923.Contig2_All	630	7	43	0.5224	3.2932	2.65626	Up	7.43308e-08	2.25645e-06
CL1583.Contig1_All	2531	22	135	0.4087	2.5736	2.65467	Up	6.5677e-22	6.24437e-20
CL17488.Contig1_All	902	379	2325	19.7544	124.369	2.65438	Up	0	0
CL5710.Contig2_All	1285	301	1844	11.0127	69.2395	2.65243	Up	7.10234e-279	9.04861e-276
Unigene43508_All	232	8	49	1.6212	10.1907	2.65212	Up	9.02318e-09	3.13372e-07
CL1013.Contig1_All	1935	8	49	0.1944	1.2218	2.65191	Up	9.02318e-09	3.13282e-07
CL17548.Contig3_All	3066	8	49	0.1227	0.7711	2.65178	Up	9.02318e-09	3.13462e-07
CL12250.Contig1_All	1693	10	61	0.2777	1.7385	2.64624	Up	1.35554e-10	5.81583e-09
CL2289.Contig14_All	2119	17	103	0.3772	2.3453	2.63637	Up	6.30778e-17	4.4856e-15
CL11674.Contig2_All	798	45	271	2.6512	16.3856	2.62771	Up	5.0736e-42	9.26204e-40
CL942.Contig3_All	642	11	66	0.8055	4.9603	2.62247	Up	2.92646e-11	1.35293e-09
Unigene18426_All	581	7	42	0.5664	3.4879	2.62247	Up	1.30437e-07	3.80324e-06
Unigene31484_All	1259	5	30	0.1867	1.1497	2.62246	Up	9.14982e-06	0.000184664
CL8662.Contig2_All	770	16	96	0.9769	6.0156	2.62243	Up	8.77534e-16	5.77545e-14
CL1211.Contig3_All	3026	63	378	0.9788	6.0272	2.6224	Up	7.48354e-58	1.92714e-55
CL308.Contig1_All	1681	10	60	0.2797	1.7222	2.6223	Up	2.37186e-10	9.92646e-09
Unigene1710_All	469	6	36	0.6015	3.7036	2.62229	Up	1.08573e-06	2.678e-05
Unigene13955_All	6148	6	36	0.0459	0.2825	2.62168	Up	1.08573e-06	2.67746e-05
CL3179.Contig2_All	289	10	59	1.6268	9.8503	2.59813	Up	4.14118e-10	1.6859e-08
CL528.Contig2_All	866	19	112	1.0315	6.2402	2.59685	Up	5.26922e-18	3.96857e-16
Unigene788_All	2429	8	47	0.1548	0.9336	2.5924	Up	2.76466e-08	8.99503e-07
CL8217.Contig3_All	4902	15	88	0.1439	0.8662	2.58963	Up	2.12668e-14	1.27551e-12
CL1351.Contig6_All	2203	7	41	0.1494	0.898	2.58754	Up	2.28208e-07	6.38777e-06
CL10112.Contig3_All	1735	96	562	2.6014	15.6291	2.58687	Up	6.32984e-84	2.33573e-81
CL17495.Contig3_All	397	6	35	0.7105	4.2538	2.58185	Up	1.90166e-06	4.44418e-05
CL13475.Contig3_All	1429	12	70	0.3948	2.3635	2.58173	Up	1.10102e-11	5.33039e-10
CL17252.Contig1_All	786	6	35	0.3589	2.1485	2.58168	Up	1.90166e-06	4.44503e-05
CL3751.Contig1_All	2563	6	35	0.1101	0.6589	2.58125	Up	1.90166e-06	4.44589e-05
CL340.Contig14_All	1762	10	58	0.2668	1.5882	2.57356	Up	7.21414e-10	2.85156e-08
Unigene32985_All	228	5	29	1.031	6.137	2.57349	Up	1.605e-05	0.000304861
Unigene6889_All	710	5	29	0.3311	1.9708	2.57344	Up	1.605e-05	0.000304814
CL5176.Contig1_All	1100	5	29	0.2137	1.272	2.57344	Up	1.605e-05	0.000305005
CL1517.Contig8_All	2416	10	58	0.1946	1.1583	2.57343	Up	7.21414e-10	2.8525e-08
CL16658.Contig2_All	1227	5	29	0.1916	1.1404	2.57337	Up	1.605e-05	0.000304957
CL4820.Contig7_All	1033	5	29	0.2276	1.3545	2.57319	Up	1.605e-05	0.000304909
Unigene736_All	2430	14	81	0.2709	1.6083	2.5697	Up	2.95974e-13	1.63275e-11
CL2005.Contig2_All	1988	9	52	0.2128	1.2621	2.56826	Up	5.87918e-09	2.09041e-07
CL10954.Contig5_All	660	9	52	0.6411	3.8015	2.56795	Up	5.87918e-09	2.09102e-07
CL1385.Contig7_All	3413	8	46	0.1102	0.6503	2.56098	Up	4.81952e-08	1.50457e-06
Unigene13_All	1199	8	46	0.3137	1.8511	2.56093	Up	4.81952e-08	1.50496e-06
CL4540.Contig4_All	3491	39	224	0.5252	3.096	2.55947	Up	5.02728e-34	7.37535e-32
CL3338.Contig1_All	570	35	201	2.8869	17.0144	2.55916	Up	1.10034e-30	1.47484e-28
CL1130.Contig2_All	368	81	465	10.3483	60.9679	2.55866	Up	6.82992e-69	2.08749e-66
CL842.Contig2_All	1508	33	189	1.0288	6.0472	2.5553	Up	6.7851e-29	8.4662e-27
CL504.Contig4_All	388	7	40	0.8482	4.9742	2.55199	Up	3.98018e-07	1.0639e-05
Unigene18245_All	678	10	57	0.6934	4.0564	2.54844	Up	1.25384e-09	4.82071e-08
CL5402.Contig3_All	950	235	1337	11.6299	67.9053	2.54569	Up	1.25327e-193	1.14051e-190
CL13407.Contig1_All	3895	19	108	0.2293	1.3379	2.54466	Up	4.76604e-17	3.41937e-15
Unigene4127_All	1666	6	34	0.1693	0.9847	2.5401	Up	3.31878e-06	7.3447e-05
CL1351.Contig2_All	956	12	68	0.5901	3.432	2.54002	Up	3.31866e-11	1.52493e-09
CL8185.Contig7_All	1609	29	164	0.8474	4.9179	2.53693	Up	4.47944e-25	4.81492e-23
Unigene20374_All	2599	11	62	0.199	1.151	2.53205	Up	2.68076e-10	1.11537e-08
CL16660.Contig2_All	949	8	45	0.3963	2.2879	2.52936	Up	8.37758e-08	2.52481e-06
CL1419.Contig3_All	1619	4028	22628	116.97	674.366	2.52739	Up	0	0
CL2073.Contig2_All	1978	28	157	0.6655	3.8297	2.52472	Up	6.08256e-24	6.27613e-22
CL8499.Contig4_All	2024	5	28	0.1161	0.6675	2.5234	Up	2.80342e-05	0.000497371
CL17458.Contig1_All	745	5	28	0.3155	1.8134	2.52299	Up	2.80342e-05	0.000497225
Unigene16155_All	391	5	28	0.6012	3.4552	2.52285	Up	2.80342e-05	0.000497152
Unigene3355_All	853	5	28	0.2756	1.5838	2.52274	Up	2.80342e-05	0.000497298
Unigene30291_All	1315	409	2286	14.6228	83.8777	2.52007	Up	0	0
CL7415.Contig7_All	1930	18	100	0.4385	2.5	2.51128	Up	1.12974e-15	7.3712e-14
CL5743.Contig5_All	1140	29	161	1.196	6.8142	2.51033	Up	2.295e-24	2.4112e-22
CL2448.Contig10_All	3327	8	44	0.113	0.6381	2.49746	Up	1.45191e-07	4.19802e-06
CL8273.Contig3_All	2650	36	198	0.6387	3.6051	2.49683	Up	1.88639e-29	2.40079e-27
CL6012.Contig3_All	926	8	44	0.4062	2.2927	2.49679	Up	1.45191e-07	4.19903e-06
CL2289.Contig8_All	1634	20	110	0.5755	3.2482	2.49675	Up	5.32516e-17	3.80024e-15
CL11134.Contig3_All	1201	12	66	0.4698	2.6515	2.49669	Up	9.92188e-11	4.32904e-09
CL1351.Contig4_All	2391	12	66	0.236	1.3319	2.49663	Up	9.92188e-11	4.3306e-09
CL7248.Contig3_All	5267	10	55	0.0893	0.5038	2.49612	Up	3.76028e-09	1.36919e-07
CL1130.Contig3_All	314	275	1510	41.1751	232.03	2.49446	Up	2.0525e-213	2.03623e-210
Unigene26835_All	1725	11	60	0.2998	1.6783	2.48493	Up	8.00788e-10	3.14988e-08
CL8556.Contig6_All	2174	9	49	0.1946	1.0875	2.48243	Up	3.06254e-08	9.88977e-07
Unigene24108_All	1508	16	87	0.4988	2.7836	2.48042	Up	1.23238e-13	7.00607e-12
Unigene20404_All	1855	7	38	0.1774	0.9884	2.47809	Up	1.19876e-06	2.92695e-05
CL7148.Contig1_All	935	7	38	0.352	1.961	2.47794	Up	1.19876e-06	2.92636e-05
CL1130.Contig1_All	679	144	779	9.9707	55.3559	2.47297	Up	6.6162e-110	3.309e-107
CL6248.Contig4_All	1862	10	54	0.2525	1.3993	2.47035	Up	6.4875e-09	2.29189e-07
CL16739.Contig2_All	661	10	54	0.7113	3.9417	2.47029	Up	6.4875e-09	2.29256e-07
CL7728.Contig1_All	985	5	27	0.2387	1.3226	2.47011	Up	4.87464e-05	0.000813334
CL6356.Contig1_All	1477	5	27	0.1592	0.882	2.46994	Up	4.87464e-05	0.000813222
CL17488.Contig3_All	967	150	809	7.2928	40.3662	2.4686	Up	7.75384e-114	4.02777e-111
Unigene9077_All	854	8	43	0.4404	2.4294	2.46371	Up	2.50852e-07	6.97321e-06
CL16201.Contig6_All	764	8	43	0.4923	2.7156	2.46366	Up	2.50852e-07	6.97001e-06
Unigene24543_All	1096	8	43	0.3432	1.893	2.46355	Up	2.50852e-07	6.97161e-06
CL1351.Contig5_All	1581	17	91	0.5055	2.7772	2.45785	Up	4.56994e-14	2.68371e-12
CL3124.Contig4_All	506	15	80	1.3937	7.6284	2.45246	Up	1.68781e-12	8.75616e-11
CL2668.Contig6_All	1176	6	32	0.2399	1.3129	2.45225	Up	9.99188e-06	0.000200223
CL3338.Contig2_All	1836	178	949	4.5581	24.9396	2.45193	Up	3.48856e-132	2.13248e-129
CL7980.Contig1_All	5387	6	32	0.0524	0.2866	2.4514	Up	9.99188e-06	0.000200256
CL14739.Contig2_All	1645	31	165	0.886	4.8397	2.44954	Up	2.80134e-24	2.93554e-22
Unigene11848_All	1845	69	366	1.7583	9.5715	2.44456	Up	7.35136e-52	1.67879e-49
CL2289.Contig10_All	1578	14	74	0.4171	2.2627	2.43958	Up	1.3474e-11	6.45093e-10
CL10656.Contig2_All	2046	7	37	0.1609	0.8726	2.43916	Up	2.06946e-06	4.79741e-05
CL13295.Contig1_All	857	1322	6981	72.5242	393.036	2.43813	Up	0	0
CL2919.Contig4_All	1908	8	42	0.1971	1.0621	2.42992	Up	4.3201e-07	1.1464e-05
CL13869.Contig1_All	680	8	42	0.5531	2.9801	2.42975	Up	4.3201e-07	1.14615e-05
Unigene30160_All	1386	8	42	0.2714	1.4621	2.42955	Up	4.3201e-07	1.14665e-05
CL2414.Contig4_All	4897	13	68	0.1248	0.67	2.42454	Up	1.07773e-10	4.68368e-09
CL7280.Contig1_All	718	9	47	0.5893	3.1584	2.42212	Up	9.07464e-08	2.71394e-06
Unigene9055_All	1800	9	47	0.2351	1.2599	2.42196	Up	9.07464e-08	2.71461e-06
CL39.Contig6_All	1950	9	47	0.217	1.1629	2.42196	Up	9.07464e-08	2.71528e-06
CL13351.Contig1_All	1731	21	109	0.5704	3.0383	2.41322	Up	2.92456e-16	1.98413e-14
CL16166.Contig2_All	3438	16	83	0.2188	1.1648	2.4124	Up	1.0638e-12	5.61026e-11
CL249.Contig15_All	939	12	62	0.6008	3.1858	2.4067	Up	8.6391e-10	3.38716e-08
CL2250.Contig1_All	4822	6	31	0.0585	0.3102	2.40669	Up	1.72304e-05	0.000324483
CL2247.Contig8_All	2647	6	31	0.1066	0.5651	2.4063	Up	1.72304e-05	0.000324432
CL8216.Contig6_All	2909	6	31	0.097	0.5142	2.40627	Up	1.72304e-05	0.000324382
CL7724.Contig3_All	1270	13	67	0.4813	2.5455	2.40294	Up	1.84318e-10	7.8084e-09
Unigene50_All	3504	7	36	0.0939	0.4957	2.40027	Up	3.5593e-06	7.80563e-05
CL98.Contig2_All	1256	7	36	0.262	1.383	2.40016	Up	3.5593e-06	7.80846e-05
Unigene15640_All	1227	7	36	0.2682	1.4156	2.40003	Up	3.5593e-06	7.80705e-05
CL4631.Contig3_All	900	7	36	0.3657	1.93	2.39987	Up	3.5593e-06	7.80988e-05
CL6112.Contig2_All	2239	8	41	0.168	0.8835	2.39477	Up	7.41508e-07	1.88742e-05
CL2544.Contig3_All	1453	8	41	0.2589	1.3615	2.39473	Up	7.41508e-07	1.88703e-05
CL2289.Contig4_All	1500	19	97	0.5955	3.1202	2.38947	Up	1.81626e-14	1.0953e-12
CL4701.Contig3_All	2214	19	97	0.4035	2.1139	2.38927	Up	1.81626e-14	1.09476e-12
Unigene11670_All	1096	10	51	0.429	2.2452	2.38779	Up	3.2785e-08	1.0545e-06
Unigene21714_All	770	505	2573	30.8342	161.23	2.38651	Up	0	0
CL4688.Contig2_All	554	12	61	1.0184	5.3127	2.38314	Up	1.4754e-09	5.62964e-08
Unigene27888_All	468	71	360	7.1325	37.1153	2.37953	Up	1.74581e-49	3.80036e-47
CL258.Contig18_All	3417	16	81	0.2201	1.1438	2.3776	Up	3.09202e-12	1.5711e-10
CL13257.Contig2_All	1096	16	81	0.6863	3.5659	2.37735	Up	3.09202e-12	1.57044e-10
CL4096.Contig2_All	1863	1110	5558	28.0119	143.947	2.36142	Up	0	0
Unigene27732_All	1699	9	45	0.249	1.278	2.35967	Up	2.65632e-07	7.35031e-06
Unigene15643_All	893	7	35	0.3685	1.8911	2.35949	Up	6.09786e-06	0.0001278
CL4300.Contig1_All	4683	28	140	0.2811	1.4424	2.35932	Up	5.54474e-20	4.73938e-18
CL3349.Contig2_All	1789	6	30	0.1577	0.8091	2.35914	Up	2.95818e-05	0.000522149
CL10444.Contig2_All	1882	7	35	0.1749	0.8973	2.35906	Up	6.09786e-06	0.000127844
CL8928.Contig2_All	1880	7	35	0.1751	0.8983	2.35902	Up	6.09786e-06	0.000127822
CL7027.Contig4_All	3714	6	30	0.076	0.3897	2.35829	Up	2.95818e-05	0.000522225
CL12739.Contig4_All	1268	24	119	0.8899	4.5282	2.34722	Up	4.21766e-17	3.03493e-15
CL2447.Contig3_All	1912	19	94	0.4672	2.3721	2.34405	Up	8.89656e-14	5.1129e-12
Unigene6198_All	654	17	84	1.2221	6.1972	2.34225	Up	1.91688e-12	9.91055e-11
CL3631.Contig8_All	2778	100	494	1.6924	8.5801	2.34192	Up	4.84168e-66	1.42928e-63
CL2289.Contig11_All	2697	14	69	0.2441	1.2344	2.33827	Up	1.94231e-10	8.20537e-09
CL5710.Contig4_All	2052	590	2904	13.5178	68.2834	2.33667	Up	0	0
CL6280.Contig9_All	924	11	54	0.5597	2.8198	2.33287	Up	2.01236e-08	6.68759e-07
Unigene9631_All	784	10	49	0.5997	3.0156	2.33013	Up	9.5178e-08	2.83457e-06
Unigene9432_All	1169	10	49	0.4022	2.0224	2.33008	Up	9.5178e-08	2.83526e-06
CL1419.Contig1_All	273	19	93	3.2721	16.4368	2.32864	Up	1.50589e-13	8.50897e-12
CL10405.Contig1_All	544	18	88	1.5556	7.8051	2.32695	Up	6.98576e-13	3.74284e-11
CL2822.Contig1_All	1579	212	1036	6.3123	31.6573	2.3263	Up	1.80894e-135	1.12278e-132
CL17159.Contig6_All	1171	513	2505	20.5965	103.216	2.3252	Up	0	0
CL17488.Contig6_All	887	970	4734	51.4139	257.514	2.32442	Up	0	0
CL15416.Contig1_All	948	8	39	0.3967	1.985	2.32302	Up	2.16144e-06	4.98201e-05
Unigene27406_All	905	16	78	0.8312	4.1586	2.32283	Up	1.51036e-11	7.20834e-10
CL8185.Contig12_All	1616	53	258	1.5419	7.7033	2.32077	Up	6.71612e-35	1.00978e-32
CL2609.Contig3_All	498	7	34	0.6608	3.2942	2.31764	Up	1.04043e-05	0.000207492
CL15814.Contig2_All	2382	14	68	0.2763	1.3774	2.31764	Up	3.29036e-10	1.35641e-08
CL5770.Contig5_All	1443	7	34	0.2281	1.1369	2.31737	Up	1.04043e-05	0.00020756
Unigene25125_All	1109	7	34	0.2968	1.4793	2.31735	Up	1.04043e-05	0.000207526
CL2289.Contig1_All	1634	20	97	0.5755	2.8643	2.31529	Up	5.49246e-14	3.21611e-12
CL6069.Contig2_All	1945	13	63	0.3142	1.5628	2.31438	Up	1.54118e-09	5.86399e-08
CL17488.Contig2_All	862	142	687	7.7449	38.4544	2.31183	Up	8.95642e-90	3.53102e-87
Unigene4987_All	1537	6	29	0.1835	0.9104	2.31072	Up	5.05506e-05	0.000836747
CL523.Contig4_All	1554	6	29	0.1815	0.9004	2.3106	Up	5.05506e-05	0.00083709
CL3469.Contig2_All	1022	6	29	0.276	1.3691	2.31049	Up	5.05506e-05	0.000836632
CL17896.Contig2_All	753	6	29	0.3746	1.8582	2.31048	Up	5.05506e-05	0.000837205
CL5268.Contig5_All	1234	6	29	0.2286	1.1339	2.3104	Up	5.05506e-05	0.000836861
CL2744.Contig4_All	1005	6	29	0.2807	1.3923	2.31037	Up	5.05506e-05	0.000837319
CL1693.Contig2_All	2255	6	29	0.1251	0.6205	2.31035	Up	5.05506e-05	0.000836975
Unigene8076_All	1922	11	53	0.2691	1.3305	2.30575	Up	3.41178e-08	1.09243e-06
CL7025.Contig2_All	1450	11	53	0.3567	1.7636	2.30574	Up	3.41178e-08	1.09272e-06
Unigene6216_All	1022	10	48	0.46	2.2661	2.30051	Up	1.61427e-07	4.62218e-06
CL14130.Contig2_All	752	10	48	0.6252	3.0798	2.30045	Up	1.61427e-07	4.62327e-06
CL11741.Contig2_All	3027	15	72	0.233	1.1477	2.30034	Up	1.19013e-10	5.15549e-09
CL4330.Contig4_All	2059	29	139	0.6622	3.2573	2.29834	Up	2.79484e-19	2.29334e-17
CL4540.Contig3_All	3412	38	182	0.5236	2.5737	2.29731	Up	8.84678e-25	9.43394e-23
CL18037.Contig3_All	1782	9	43	0.2374	1.1643	2.29407	Up	7.67414e-07	1.94518e-05
CL1095.Contig2_All	606	9	43	0.6982	3.4237	2.29384	Up	7.67414e-07	1.946e-05
Unigene12148_All	727	9	43	0.582	2.8538	2.29379	Up	7.67414e-07	1.94559e-05
Unigene15176_All	469	9	43	0.9022	4.4238	2.29377	Up	7.67414e-07	1.94681e-05
CL4270.Contig6_All	2368	9	43	0.1787	0.8762	2.29372	Up	7.67414e-07	1.9464e-05
CL706.Contig8_All	873	17	81	0.9155	4.4768	2.28984	Up	9.25018e-12	4.51624e-10
CL1459.Contig4_All	1165	65	309	2.6231	12.7976	2.28653	Up	9.017e-41	1.61205e-38
Unigene13960_All	5280	8	38	0.0712	0.3473	2.28623	Up	3.66956e-06	8.02562e-05
Unigene6175_All	938	109	518	5.4633	26.6454	2.28604	Up	3.24784e-67	9.7785e-65
Unigene8023_All	1645	8	38	0.2286	1.1146	2.28563	Up	3.66956e-06	8.03143e-05
CL6709.Contig1_All	1207	8	38	0.3116	1.5191	2.28545	Up	3.66956e-06	8.02707e-05
Unigene18379_All	297	8	38	1.2664	6.1734	2.28533	Up	3.66956e-06	8.02997e-05
CL10852.Contig3_All	2594	8	38	0.145	0.7068	2.28525	Up	3.66956e-06	8.02852e-05
CL17094.Contig2_All	1879	8	38	0.2002	0.9758	2.28514	Up	3.66956e-06	8.03288e-05
CL6058.Contig4_All	3964	138	655	1.6367	7.9727	2.28428	Up	1.87687e-84	6.94687e-82
CL6058.Contig2_All	4273	76	360	0.8362	4.065	2.28134	Up	4.15656e-47	8.67381e-45
Unigene4646_All	2756	15	71	0.2559	1.243	2.28017	Up	2.00692e-10	8.46944e-09
Unigene14485_All	1166	7	33	0.2822	1.3656	2.27475	Up	1.7676e-05	0.000331585
CL11860.Contig2_All	3834	21	99	0.2575	1.2459	2.27454	Up	5.67118e-14	3.31754e-12
Unigene17994_All	1217	7	33	0.2704	1.3083	2.27453	Up	1.7676e-05	0.000331636
CL12871.Contig2_All	1586	21	99	0.6225	3.0118	2.27448	Up	5.67118e-14	3.31594e-12
Unigene7855_All	824	7	33	0.3994	1.9323	2.27441	Up	1.7676e-05	0.000331687
CL14547.Contig3_All	1118	7	33	0.2944	1.4242	2.2743	Up	1.7676e-05	0.000331739
Unigene1191_All	1633	45	212	1.2956	6.2639	2.27344	Up	2.83182e-28	3.4412e-26
CL5831.Contig6_All	1342	17	80	0.5956	2.8763	2.2718	Up	1.55701e-11	7.42514e-10
CL9380.Contig1_All	2115	10	47	0.2223	1.0722	2.26999	Up	2.72912e-07	7.52766e-06
CL17488.Contig4_All	952	356	1672	17.5811	84.7414	2.26904	Up	5.46738e-211	5.37995e-208
CL8202.Contig2_All	455	39	183	4.0298	19.406	2.26772	Up	1.53349e-24	1.62382e-22
CL1990.Contig3_All	1291	58	271	2.1122	10.1284	2.26159	Up	1.70809e-35	2.62354e-33
CL2305.Contig1_All	1465	9	42	0.2888	1.3833	2.25997	Up	1.29755e-06	3.14533e-05
CL11502.Contig2_All	1809	9	42	0.2339	1.1202	2.25979	Up	1.29755e-06	3.1447e-05
CL3527.Contig1_All	1418	14	65	0.4642	2.2117	2.25234	Up	1.57719e-09	5.98972e-08
CL8660.Contig2_All	1726	11	51	0.2996	1.4257	2.25056	Up	9.72052e-08	2.8928e-06
CL6969.Contig1_All	1358	30	139	1.0386	4.9387	2.24949	Up	8.09014e-19	6.42503e-17
Unigene30318_All	2169	94	435	2.0375	9.6767	2.24772	Up	1.39255e-55	3.43968e-53
CL8799.Contig2_All	2368	8	37	0.1588	0.7539	2.24716	Up	6.2053e-06	0.000129782
CL16208.Contig1_All	1100	8	37	0.3419	1.6229	2.24693	Up	6.2053e-06	0.000129737
Unigene8578_All	1331	8	37	0.2826	1.3413	2.2468	Up	6.2053e-06	0.000129804
Unigene22729_All	2513	8	37	0.1497	0.7104	2.24656	Up	6.2053e-06	0.000129759
CL8263.Contig2_All	1541	13	60	0.3966	1.8786	2.2439	Up	7.3847e-09	2.59371e-07
Unigene26783_All	3079	13	60	0.1985	0.9402	2.24383	Up	7.3847e-09	2.59446e-07
Unigene27274_All	626	10	46	0.751	3.5455	2.2391	Up	4.59866e-07	1.21394e-05
CL17189.Contig1_All	905	10	46	0.5195	2.4525	2.23906	Up	4.59866e-07	1.21367e-05
CL2289.Contig7_All	1565	22	101	0.6609	3.1139	2.23622	Up	5.78314e-14	3.37651e-12
CL6754.Contig3_All	1428	17	78	0.5597	2.6355	2.23535	Up	4.38432e-11	1.9867e-09
CL10923.Contig3_All	594	7	32	0.554	2.5993	2.23017	Up	2.9895e-05	0.000527139
CL8852.Contig1_All	2763	7	32	0.1191	0.5588	2.23016	Up	2.9895e-05	0.000527062
CL2892.Contig4_All	447	7	32	0.7362	3.4541	2.23014	Up	2.9895e-05	0.000527216
Unigene6438_All	1151	896	4096	36.5986	171.704	2.23006	Up	0	0
CL1455.Contig4_All	3841	7	32	0.0857	0.402	2.22983	Up	2.9895e-05	0.000527293
CL14802.Contig1_All	699	34	155	2.2868	10.6992	2.2261	Up	1.43049e-20	1.26655e-18
CL10939.Contig2_All	1078	9	41	0.3925	1.8351	2.22509	Up	2.18582e-06	5.03246e-05
CL13763.Contig1_All	615	18	82	1.376	6.4333	2.22508	Up	1.5809e-11	7.5331e-10
CL523.Contig5_All	2903	11	50	0.1781	0.831	2.22216	Up	1.63318e-07	4.66861e-06
CL15603.Contig1_All	2480	11	50	0.2085	0.9728	2.2221	Up	1.63318e-07	4.66971e-06
CL6157.Contig4_All	983	83	377	3.9697	18.5048	2.2208	Up	1.06283e-47	2.24108e-45
Unigene17112_All	1938	13	59	0.3154	1.4689	2.21948	Up	1.23839e-08	4.23048e-07
CL17710.Contig1_All	3126	32	145	0.4813	2.2381	2.21727	Up	2.99336e-19	2.45125e-17
Unigene11736_All	1848	470	2121	11.9572	55.3777	2.21143	Up	8.87996e-259	1.02359e-255
CL340.Contig6_All	5514	12	54	0.1023	0.4725	2.20751	Up	5.81088e-08	1.79599e-06
CL8920.Contig1_All	1093	8	36	0.3441	1.5892	2.2074	Up	1.04498e-05	0.000208365
CL1558.Contig3_All	2087	34	153	0.7659	3.5372	2.20738	Up	3.96814e-20	3.43299e-18
CL533.Contig9_All	1648	10	45	0.2853	1.3175	2.20725	Up	7.72224e-07	1.95533e-05
CL1197.Contig2_All	2375	10	45	0.198	0.9142	2.20701	Up	7.72224e-07	1.95574e-05
CL8263.Contig7_All	1594	31	139	0.9143	4.2075	2.20222	Up	2.27978e-18	1.75193e-16
CL15731.Contig1_All	923	31	139	1.579	7.2662	2.20219	Up	2.27978e-18	1.75304e-16
CL7018.Contig2_All	675	19	85	1.3234	6.0759	2.19885	Up	9.51234e-12	4.63489e-10
CL6058.Contig3_All	4117	36	161	0.4111	1.8869	2.19846	Up	5.26102e-21	4.76258e-19
Unigene21444_All	1159	17	76	0.6896	3.1639	2.19787	Up	1.22407e-10	5.28741e-09
CL3260.Contig2_All	974	26	116	1.255	5.7464	2.19497	Up	1.66365e-15	1.07505e-13
CL11484.Contig2_All	2347	118	526	2.3637	10.8136	2.19373	Up	6.51952e-65	1.88324e-62
Unigene655_All	1215	11	49	0.4256	1.9459	2.19287	Up	2.73514e-07	7.53739e-06
Unigene28066_All	1179	78	347	3.1104	14.2008	2.1908	Up	2.54698e-43	4.80169e-41
CL11484.Contig1_All	2476	75	333	1.4241	6.4892	2.18799	Up	1.42314e-41	2.57855e-39
CL9222.Contig2_All	4242	32	142	0.3547	1.6152	2.18704	Up	1.3766e-18	1.07286e-16
CL9222.Contig1_All	1680	16	71	0.4478	2.0391	2.18701	Up	5.68246e-10	2.27135e-08
Unigene4839_All	3880	7	31	0.0848	0.3855	2.18459	Up	5.0321e-05	0.000833858
CL16084.Contig2_All	628	7	31	0.524	2.3818	2.18441	Up	5.0321e-05	0.000834315
Unigene11020_All	3255	7	31	0.1011	0.4595	2.18428	Up	5.0321e-05	0.00083443
Unigene15558_All	1653	7	31	0.1991	0.9049	2.18427	Up	5.0321e-05	0.000834201
CL16111.Contig1_All	748	7	31	0.44	1.9997	2.18421	Up	5.0321e-05	0.000833973
CL8332.Contig2_All	1926	7	31	0.1709	0.7766	2.18402	Up	5.0321e-05	0.000834087
CL13101.Contig3_All	845	58	256	3.227	14.6177	2.17945	Up	3.5473e-32	5.00981e-30
Unigene11735_All	1048	459	2023	20.5913	93.1388	2.17735	Up	3.5193e-242	3.8374e-239
CL1351.Contig7_All	2552	60	264	1.1054	4.9914	2.17488	Up	4.73512e-33	6.78232e-31
CL12722.Contig3_All	2216	18	79	0.3819	1.7201	2.17123	Up	7.31972e-11	3.23804e-09
CL4011.Contig4_All	1682	67	294	1.8728	8.4337	2.17097	Up	1.50727e-36	2.37538e-34
CL258.Contig13_All	3730	13	57	0.1639	0.7373	2.16944	Up	3.4534e-08	1.10546e-06
CL4096.Contig3_All	1862	979	4289	24.7192	111.141	2.16868	Up	0	0
CL842.Contig1_All	1557	37	162	1.1172	5.0202	2.16786	Up	8.72906e-21	7.81438e-19
CL3981.Contig1_All	646	8	35	0.5822	2.6142	2.16678	Up	1.75214e-05	0.000329091
CL10454.Contig2_All	730	8	35	0.5152	2.3133	2.16675	Up	1.75214e-05	0.00032904
CL8493.Contig2_All	1387	8	35	0.2712	1.2176	2.16661	Up	1.75214e-05	0.000328989
CL4087.Contig2_All	1902	11	48	0.2719	1.2177	2.16301	Up	4.56534e-07	1.20619e-05
CL1803.Contig3_All	1360	11	48	0.3803	1.7029	2.16278	Up	4.56534e-07	1.20593e-05
CL14356.Contig2_All	3284	36	157	0.5154	2.3067	2.16207	Up	3.97404e-20	3.43564e-18
Unigene8553_All	2889	25	109	0.4068	1.8204	2.16186	Up	2.10182e-14	1.26123e-12
CL7497.Contig2_All	1245	25	109	0.9441	4.2243	2.1617	Up	2.10182e-14	1.26185e-12
CL15058.Contig3_All	1397	14	61	0.4712	2.1068	2.16064	Up	1.23046e-08	4.20459e-07
CL2289.Contig16_All	1215	31	135	1.1995	5.3611	2.1601	Up	1.72648e-17	1.26797e-15
CL2289.Contig3_All	1680	31	135	0.8675	3.8772	2.16008	Up	1.72648e-17	1.26874e-15
CL17237.Contig3_All	1990	17	74	0.4016	1.7942	2.15951	Up	3.3872e-10	1.39348e-08
CL340.Contig5_All	7565	40	174	0.2486	1.1098	2.1584	Up	4.19686e-22	4.04104e-20
CL6221.Contig1_All	1290	9	39	0.328	1.4587	2.15292	Up	6.13096e-06	0.000128449
Unigene18785_All	622	15	65	1.1338	5.0422	2.15289	Up	4.39108e-09	1.58884e-07
CL4207.Contig1_All	3396	303	1313	4.1948	18.6549	2.15288	Up	1.17646e-155	8.32694e-153
Unigene8811_All	1160	202	872	8.187	36.2706	2.14739	Up	1.14015e-103	5.2271e-101
Unigene28166_All	1578	13	56	0.3873	1.7123	2.14441	Up	5.74168e-08	1.77641e-06
CL7156.Contig1_All	427	23	99	2.5324	11.1867	2.14321	Up	4.41878e-13	2.40692e-11
CL5132.Contig5_All	1259	10	43	0.3734	1.6479	2.14183	Up	2.15406e-06	4.97068e-05
Unigene9244_All	746	10	43	0.6302	2.7812	2.14183	Up	2.15406e-06	4.97258e-05
CL13551.Contig3_All	1025	10	43	0.4587	2.0241	2.14166	Up	2.15406e-06	4.96879e-05
CL16101.Contig3_All	2163	10	43	0.2174	0.9592	2.14148	Up	2.15406e-06	4.96974e-05
CL542.Contig1_All	2057	10	43	0.2286	1.0086	2.14146	Up	2.15406e-06	4.97163e-05
CL455.Contig5_All	1448	78	335	2.5326	11.1628	2.14001	Up	1.05033e-40	1.875e-38
CL6935.Contig2_All	1674	59	253	1.657	7.2922	2.13778	Up	4.3322e-31	5.89145e-29
CL10733.Contig1_All	2180	14	60	0.3019	1.328	2.13711	Up	2.04254e-08	6.7823e-07
Unigene11330_All	4001	14	60	0.1645	0.7236	2.1371	Up	2.04254e-08	6.78044e-07
CL2289.Contig6_All	1442	35	150	1.1411	5.0191	2.137	Up	4.93206e-19	3.97696e-17
CL5811.Contig1_All	2100	18	77	0.403	1.7692	2.13425	Up	2.01148e-10	8.48573e-09
Unigene32925_All	641	120	513	8.8015	38.6149	2.13334	Up	3.24842e-61	8.83519e-59
CL7591.Contig2_All	625	11	47	0.8275	3.6284	2.1325	Up	7.59398e-07	1.92769e-05
CL13499.Contig5_All	1044	11	47	0.4954	2.1722	2.13249	Up	7.59398e-07	1.92809e-05
Unigene30808_All	1500	11	47	0.3448	1.5118	2.13244	Up	7.59398e-07	1.9285e-05
Unigene23622_All	1070	19	81	0.8348	3.6526	2.12942	Up	7.21336e-11	3.19566e-09
CL2541.Contig2_All	1295	114	486	4.1387	18.1077	2.12935	Up	6.00728e-58	1.55359e-55
Unigene9157_All	1398	8	34	0.269	1.1735	2.12514	Up	2.9245e-05	0.000516807
CL8027.Contig1_All	692	12	51	0.8153	3.556	2.12485	Up	2.68502e-07	7.41616e-06
Unigene24560_All	1253	8	34	0.3002	1.3093	2.1248	Up	2.9245e-05	0.000516882
CL7906.Contig3_All	3640	12	51	0.155	0.676	2.12476	Up	2.68502e-07	7.41447e-06
CL11616.Contig2_All	1283	8	34	0.2932	1.2786	2.12461	Up	2.9245e-05	0.000516731
CL10112.Contig2_All	1540	37	157	1.1296	4.919	2.12255	Up	1.06906e-19	9.01687e-18
Unigene30819_All	1430	21	89	0.6904	3.003	2.1209	Up	9.30252e-12	4.53997e-10
CL5095.Contig6_All	1634	17	72	0.4891	2.1261	2.12001	Up	9.28584e-10	3.62546e-08
CL5904.Contig1_All	1429	34	144	1.1186	4.8621	2.11989	Up	3.6922e-18	2.79648e-16
CL258.Contig2_All	3826	13	55	0.1597	0.6936	2.11874	Up	9.5173e-08	2.83581e-06
CL6769.Contig5_All	1066	13	55	0.5733	2.4894	2.11844	Up	9.5173e-08	2.83651e-06
CL16714.Contig1_All	1867	107	452	2.6945	11.6813	2.11611	Up	1.34471e-53	3.20381e-51
CL9712.Contig2_All	907	9	38	0.4665	2.0215	2.11548	Up	1.02048e-05	0.000203949
CL9747.Contig2_All	2189	9	38	0.1933	0.8376	2.11542	Up	1.02048e-05	0.00020405
Unigene339_All	1165	9	38	0.3632	1.5738	2.11542	Up	1.02048e-05	0.000204017
Unigene18394_All	365	9	38	1.1593	5.0233	2.11538	Up	1.02048e-05	0.000203983
CL17359.Contig1_All	1635	23	97	0.6614	2.8625	2.11368	Up	1.2036e-12	6.31995e-11
CL4487.Contig5_All	3399	14	59	0.1936	0.8375	2.11301	Up	3.3809e-08	1.08397e-06
CL17558.Contig4_All	1772	14	59	0.3714	1.6065	2.11288	Up	3.3809e-08	1.08426e-06
Unigene17129_All	1345	14	59	0.4894	2.1165	2.11259	Up	3.3809e-08	1.08369e-06
CL3751.Contig11_All	2266	14	59	0.2905	1.2563	2.11257	Up	3.3809e-08	1.0834e-06
CL8799.Contig1_All	2286	67	282	1.3779	5.9521	2.11093	Up	6.00708e-34	8.79147e-32
Unigene17555_All	2375	10	42	0.198	0.8533	2.10755	Up	3.57714e-06	7.84191e-05
CL5136.Contig3_All	1930	100	419	2.436	10.475	2.10436	Up	1.82804e-49	3.97223e-47
CL2073.Contig3_All	1955	81	339	1.9479	8.3666	2.10272	Up	2.70594e-40	4.78813e-38
Unigene28239_All	775	11	46	0.6673	2.8639	2.10157	Up	1.25866e-06	3.06211e-05
CL15290.Contig2_All	1543	3347	13996	101.982	437.657	2.10149	Up	0	0
Unigene11528_All	987	11	46	0.524	2.2487	2.10145	Up	1.25866e-06	3.06149e-05
Unigene8254_All	2495	11	46	0.2073	0.8896	2.10144	Up	1.25866e-06	3.06088e-05
Unigene12458_All	1252	138	576	5.1821	22.198	2.09882	Up	3.84576e-67	1.155e-64
CL1128.Contig8_All	1960	12	50	0.2878	1.2309	2.09658	Up	4.44298e-07	1.17566e-05
CL810.Contig1_All	1341	12	50	0.4207	1.799	2.09633	Up	4.44298e-07	1.1754e-05
Unigene4771_All	3474	48	200	0.6496	2.7778	2.09632	Up	2.53988e-24	2.66386e-22
Unigene13961_All	7080	12	50	0.0797	0.3407	2.09585	Up	4.44298e-07	1.17515e-05
CL15899.Contig2_All	3294	39	162	0.5566	2.3729	2.09194	Up	6.22812e-20	5.30477e-18
CL8556.Contig5_All	2151	29	120	0.6339	2.6918	2.08624	Up	4.34408e-15	2.74271e-13
CL16322.Contig1_All	763	30	124	1.8485	7.8414	2.08476	Up	1.56882e-15	1.0154e-13
CL12331.Contig1_All	1079	15	62	0.6536	2.7725	2.08471	Up	1.98378e-08	6.59803e-07
CL7293.Contig1_All	1898	23	95	0.5697	2.415	2.08375	Up	3.2541e-12	1.64792e-10
CL944.Contig3_All	2120	8	33	0.1774	0.7511	2.082	Up	4.85808e-05	0.000811018
CL4503.Contig1_All	1098	8	33	0.3425	1.4501	2.08198	Up	4.85808e-05	0.000810906
CL17239.Contig2_All	703	8	33	0.535	2.2649	2.08184	Up	4.85808e-05	0.000810794
Unigene17307_All	1934	8	33	0.1945	0.8233	2.08165	Up	4.85808e-05	0.000811242
CL1128.Contig18_All	2582	8	33	0.1457	0.6167	2.08157	Up	4.85808e-05	0.00081113
CL7644.Contig6_All	2110	9	37	0.2005	0.8461	2.07723	Up	1.69117e-05	0.000319127
CL8273.Contig7_All	2054	9	37	0.206	0.8692	2.07704	Up	1.69117e-05	0.000319176
CL16651.Contig1_All	658	9	37	0.6431	2.7131	2.07683	Up	1.69117e-05	0.000319077
CL8674.Contig1_All	875	73	300	3.9224	16.5428	2.07639	Up	2.70884e-35	4.12921e-33
CL7728.Contig2_All	980	19	78	0.9115	3.8403	2.0749	Up	3.22212e-10	1.32918e-08
Unigene1367_All	805	10	41	0.584	2.4574	2.07309	Up	5.9166e-06	0.00012441
CL12446.Contig3_All	1809	10	41	0.2599	1.0936	2.07306	Up	5.9166e-06	0.000124432
CL861.Contig1_All	1144	10	41	0.411	1.7292	2.07289	Up	5.9166e-06	0.000124388
CL18104.Contig1_All	508	11	45	1.018	4.2741	2.06988	Up	2.07846e-06	4.81551e-05
CL340.Contig1_All	5087	11	45	0.1017	0.4268	2.06924	Up	2.07846e-06	4.81643e-05
Unigene24460_All	2436	5605	22897	108.176	453.521	2.06779	Up	0	0
CL11978.Contig2_All	859	40	163	2.1893	9.1557	2.0642	Up	9.88468e-20	8.35456e-18
Unigene27918_All	374	27	110	3.3941	14.1911	2.06389	Up	8.95358e-14	5.14079e-12
CL3829.Contig3_All	907	14	57	0.7257	3.0322	2.06292	Up	9.1806e-08	2.74359e-06
CL258.Contig17_All	3870	14	57	0.1701	0.7107	2.06286	Up	9.1806e-08	2.74224e-06
CL14279.Contig2_All	1943	14	57	0.3388	1.4155	2.06281	Up	9.1806e-08	2.74292e-06
CL17511.Contig2_All	1347	18	73	0.6283	2.6149	2.05723	Up	1.47737e-09	5.63361e-08
Unigene24334_All	1702	19	77	0.5248	2.1829	2.05641	Up	5.28224e-10	2.11908e-08
CL340.Contig2_All	6958	39	158	0.2635	1.0956	2.05585	Up	4.45216e-19	3.60199e-17
CL10947.Contig2_All	1790	53	214	1.3921	5.7684	2.05091	Up	3.05942e-25	3.30912e-23
CL3127.Contig5_All	797	216	871	12.7417	52.7298	2.04906	Up	1.33976e-97	5.81202e-95
CL3829.Contig2_All	926	41	165	2.0816	8.5974	2.04621	Up	9.52896e-20	8.05953e-18
CL3734.Contig1_All	782	1469	5907	88.3176	364.465	2.04501	Up	0	0
CL8202.Contig3_All	1577	192	771	5.724	23.5895	2.04305	Up	2.8155e-86	1.06158e-83
Unigene31433_All	758	10	40	0.6202	2.5462	2.03754	Up	9.74542e-06	0.000195771
CL6966.Contig6_All	803	11	44	0.644	2.6438	2.03748	Up	3.419e-06	7.53618e-05
CL16660.Contig3_All	850	10	40	0.5531	2.2706	2.03746	Up	9.74542e-06	0.000195803
CL11268.Contig2_All	2186	29	116	0.6237	2.5604	2.03745	Up	3.10126e-14	1.83907e-12
CL15231.Contig1_All	1239	11	44	0.4174	1.7135	2.03744	Up	3.419e-06	7.53756e-05
CL12532.Contig2_All	1137	22	88	0.9097	3.7344	2.03741	Up	3.97172e-11	1.80582e-09
CL6395.Contig5_All	2198	118	472	2.524	10.3612	2.03741	Up	2.63852e-53	6.23727e-51
CL5863.Contig5_All	1511	13	52	0.4045	1.6605	2.03741	Up	4.2521e-07	1.1296e-05
Unigene17612_All	1626	14	56	0.4048	1.6617	2.03738	Up	1.50583e-07	4.33837e-06
Unigene17381_All	1154	9	36	0.3667	1.5052	2.03728	Up	2.78994e-05	0.00049527
CL258.Contig23_All	1672	9	36	0.2531	1.0389	2.03728	Up	2.78994e-05	0.000495342
CL258.Contig1_All	3926	13	52	0.1557	0.6391	2.03727	Up	4.2521e-07	1.12935e-05
CL258.Contig15_All	4259	12	48	0.1325	0.5438	2.03708	Up	1.20387e-06	2.93826e-05
Unigene21922_All	2721	163	650	2.8164	11.5261	2.03298	Up	1.47548e-72	4.68717e-70
CL1422.Contig2_All	1745	53	211	1.4279	5.8342	2.03064	Up	1.31622e-24	1.39742e-22
CL16299.Contig1_All	1276	37	147	1.3633	5.5586	2.02762	Up	1.46641e-17	1.08222e-15
CL13573.Contig3_All	3052	21	83	0.3235	1.3122	2.02015	Up	1.80578e-10	7.65532e-09
Unigene26834_All	2442	20	79	0.385	1.5609	2.01945	Up	5.04194e-10	2.02873e-08
Unigene8947_All	1054	18	71	0.8029	3.2502	2.01724	Up	3.94516e-09	1.43306e-07
Unigene11517_All	3582	16	63	0.21	0.8486	2.0147	Up	3.10508e-08	1.00191e-06
CL1291.Contig8_All	687	15	59	1.0265	4.1437	2.01319	Up	8.73426e-08	2.62316e-06
CL15058.Contig2_All	1596	15	59	0.4419	1.7837	2.01308	Up	8.73426e-08	2.62381e-06
CL14892.Contig2_All	3441	29	114	0.3962	1.5985	2.01242	Up	8.2061e-14	4.72507e-12
CL11310.Contig2_All	1149	68	267	2.7824	11.2121	2.01065	Up	2.3481e-30	3.10938e-28
Unigene458_All	1720	13	51	0.3553	1.4307	2.00961	Up	6.9562e-07	1.78035e-05
CL258.Contig16_All	4131	12	47	0.1366	0.549	2.00685	Up	1.97085e-06	4.58902e-05
CL2541.Contig3_All	1255	46	180	1.7232	6.9203	2.00574	Up	6.74898e-21	6.07775e-19
CL340.Contig4_All	7210	46	180	0.3	1.2046	2.00552	Up	6.74898e-21	6.07323e-19
Unigene17791_All	586	11	43	0.8825	3.5405	2.00428	Up	5.60176e-06	0.0001182
CL6028.Contig1_All	1164	11	43	0.4443	1.7824	2.00422	Up	5.60176e-06	0.00011818
CL12549.Contig2_All	1799	11	43	0.2875	1.1533	2.00413	Up	5.60176e-06	0.000118159
Unigene30435_All	1743	10	39	0.2697	1.0796	2.00107	Up	1.59824e-05	0.00030396
CL41.Contig3_All	835	10	39	0.563	2.2536	2.00102	Up	1.59824e-05	0.000303864
Unigene21458_All	1055	10	39	0.4456	1.7836	2.00097	Up	1.59824e-05	0.000304103
CL13692.Contig1_All	633	10	39	0.7427	2.9727	2.00092	Up	1.59824e-05	0.000303912
Unigene17981_All	1144	30	117	1.2329	4.9346	2.00088	Up	4.80234e-14	2.81609e-12
Unigene13964_All	7381	20	78	0.1274	0.5099	2.00085	Up	8.20396e-10	3.22386e-08
CL8273.Contig2_All	1823	10	39	0.2579	1.0322	2.00084	Up	1.59824e-05	0.000304055
Unigene730_All	1058	10	39	0.4444	1.7786	2.00081	Up	1.59824e-05	0.000303817
CL2366.Contig1_All	1488	10	39	0.316	1.2646	2.00068	Up	1.59824e-05	0.000304151
CL340.Contig9_All	7061	30	117	0.1998	0.7995	2.00054	Up	4.80234e-14	2.81746e-12
CL10477.Contig11_All	3507	10	39	0.1341	0.5366	2.00054	Up	1.59824e-05	0.000304008
CL8799.Contig3_All	2251	18	70	0.3759	1.5004	1.99693	Up	6.42182e-09	2.27001e-07
CL238.Contig1_All	1274	9	35	0.3321	1.3255	1.99685	Up	4.58076e-05	0.00077046
CL1610.Contig1_All	1033	9	35	0.4096	1.6348	1.99683	Up	4.58076e-05	0.000770567
CL5863.Contig2_All	908	9	35	0.466	1.8599	1.99682	Up	4.58076e-05	0.000770674
CL82.Contig2_All	1838	237	921	6.0623	24.1774	1.99572	Up	1.17568e-99	5.25076e-97
CL15031.Contig2_All	3507	34	132	0.4558	1.8161	1.99437	Up	1.32319e-15	8.60095e-14
CL11306.Contig2_All	970	89	345	4.3137	17.161	1.99214	Up	2.60716e-38	4.30494e-36
Unigene31284_All	658	55	213	3.9298	15.6189	1.99077	Up	3.13812e-24	3.2771e-22
CL4997.Contig5_All	1660	47	182	1.3311	5.29	1.99065	Up	6.40892e-21	5.78011e-19
CL8376.Contig2_All	302	15	58	2.3352	9.2665	1.98848	Up	1.42283e-07	4.11886e-06
CL340.Contig3_All	6896	29	112	0.1977	0.7836	1.9868	Up	2.15678e-13	1.20462e-11
CL18078.Contig4_All	3696	29	112	0.3689	1.4621	1.98674	Up	2.15678e-13	1.20518e-11
CL14382.Contig2_All	1430	43	166	1.4137	5.601	1.98621	Up	3.70024e-19	3.00975e-17
Unigene21416_All	1340	21	81	0.7368	2.9166	1.98494	Up	4.76832e-10	1.92954e-08
CL2593.Contig6_All	835	14	54	0.7883	3.1204	1.98491	Up	4.0119e-07	1.07167e-05
CL17752.Contig2_All	2845	14	54	0.2314	0.9158	1.98464	Up	4.0119e-07	1.07119e-05
CL258.Contig5_All	4069	14	54	0.1618	0.6403	1.98454	Up	4.0119e-07	1.07143e-05
CL6395.Contig4_All	2266	47	181	0.9751	3.854	1.98273	Up	1.03508e-20	9.22528e-19
Unigene21186_All	1939	19	73	0.4607	1.8165	1.97926	Up	3.7235e-09	1.35661e-07
Unigene27132_All	651	25	96	1.8055	7.1152	1.97851	Up	1.2824e-11	6.15681e-10
CL1279.Contig4_All	814	12	46	0.6931	2.7267	1.97602	Up	3.21412e-06	7.13526e-05
Unigene3761_All	1109	11	42	0.4663	1.8273	1.97038	Up	9.14006e-06	0.000184498
CL17084.Contig2_All	1368	55	210	1.8902	7.4068	1.97031	Up	1.31673e-23	1.34261e-21
CL17234.Contig3_All	624	22	84	1.6576	6.4952	1.97028	Up	2.76796e-10	1.14849e-08
CL11899.Contig1_All	1922	31	118	0.7583	2.9623	1.96588	Up	7.33046e-14	4.237e-12
Unigene30653_All	1438	10	38	0.3269	1.275	1.96358	Up	2.60928e-05	0.000467588
CL8662.Contig4_All	1806	15	57	0.3905	1.5228	1.96333	Up	2.31042e-07	6.45515e-06
Unigene11672_All	1769	15	57	0.3987	1.5547	1.96326	Up	2.31042e-07	6.45664e-06
CL3860.Contig3_All	3511	19	72	0.2544	0.9895	1.9596	Up	6.02864e-09	2.14041e-07
CL6978.Contig1_All	1705	14	53	0.386	1.4998	1.9581	Up	6.51526e-07	1.67708e-05
CL17195.Contig1_All	988	14	53	0.6662	2.5883	1.95798	Up	6.51526e-07	1.67743e-05
CL3116.Contig2_All	1932	18	68	0.438	1.6982	1.955	Up	1.68781e-08	5.66501e-07
Unigene17229_All	2165	18	68	0.3909	1.5155	1.95492	Up	1.68781e-08	5.66344e-07
CL4513.Contig4_All	2488	31	117	0.5858	2.269	1.95358	Up	1.1816e-13	6.72051e-12
CL6395.Contig2_All	1502	141	532	4.4135	17.0898	1.95314	Up	1.02667e-56	2.58338e-54
CL8662.Contig1_All	666	44	166	3.1061	12.0262	1.953	Up	9.05598e-19	7.15919e-17
CL258.Contig4_All	4163	13	49	0.1468	0.5679	1.95178	Up	1.84175e-06	4.31917e-05
CL5628.Contig2_All	978	13	49	0.6249	2.4174	1.95176	Up	1.84175e-06	4.31833e-05
CL8662.Contig3_All	1589	17	64	0.503	1.9434	1.94995	Up	4.73224e-08	1.47846e-06
Unigene30183_All	4022	37	139	0.4325	1.6675	1.94691	Up	6.84402e-16	4.5439e-14
Unigene24828_All	1548	16	60	0.4859	1.8701	1.94438	Up	1.32901e-07	3.86668e-06
CL3640.Contig2_All	1205	12	45	0.4682	1.8019	1.94432	Up	5.22098e-06	0.000110784
Unigene24195_All	1550	12	45	0.364	1.4008	1.94424	Up	5.22098e-06	0.000110764
CL7500.Contig9_All	1419	12	45	0.3976	1.5301	1.94424	Up	5.22098e-06	0.000110803
Unigene12421_All	1742	12	45	0.3239	1.2464	1.94415	Up	5.22098e-06	0.000110823
CL14962.Contig6_All	3075	27	101	0.4128	1.5848	1.94079	Up	6.97794e-12	3.44719e-10
CL8784.Contig2_All	1192	15	56	0.5916	2.2668	1.93796	Up	3.73936e-07	1.00508e-05
CL12577.Contig2_All	978	15	56	0.7211	2.7628	1.93786	Up	3.73936e-07	1.0053e-05
CL340.Contig7_All	7866	59	220	0.3526	1.3495	1.93632	Up	3.96806e-24	4.12955e-22
CL5277.Contig3_All	834	11	41	0.6201	2.372	1.93553	Up	1.48492e-05	0.000284643
CL12885.Contig2_All	831	24	89	1.3578	5.1676	1.92822	Up	1.49615e-10	6.39418e-09
CL10947.Contig1_All	1811	48	178	1.2461	4.7424	1.9282	Up	1.04501e-19	8.82632e-18
Unigene29704_All	1925	233	864	5.6906	21.656	1.92811	Up	1.73648e-89	6.75791e-87
CL11451.Contig2_All	2086	112	415	2.5243	9.5991	1.92702	Up	7.58814e-44	1.44632e-41
CL11054.Contig1_All	458	27	100	2.7716	10.5349	1.92639	Up	1.1216e-11	5.42566e-10
CL7666.Contig1_All	1580	57	211	1.6961	6.4435	1.92562	Up	4.79206e-23	4.7658e-21
CL34.Contig12_All	2527	10	37	0.186	0.7065	1.92539	Up	4.23982e-05	0.00072164
Unigene18187_All	1288	20	74	0.73	2.7721	1.92501	Up	5.61006e-09	2.00237e-07
Unigene11703_All	797	10	37	0.5899	2.24	1.92496	Up	4.23982e-05	0.000721336
CL3151.Contig2_All	1889	10	37	0.2489	0.9451	1.9249	Up	4.23982e-05	0.000721538
CL4025.Contig1_All	847	10	37	0.5551	2.1077	1.92485	Up	4.23982e-05	0.000721234
CL1487.Contig2_All	858	10	37	0.548	2.0807	1.92482	Up	4.23982e-05	0.000721437
CL1385.Contig5_All	3408	36	133	0.4966	1.883	1.92288	Up	4.86868e-15	3.05638e-13
CL16331.Contig2_All	1869	13	48	0.327	1.2392	1.92205	Up	2.97998e-06	6.66807e-05
CL14299.Contig1_All	1031	13	48	0.5928	2.2464	1.922	Up	2.97998e-06	6.66684e-05
CL8556.Contig4_All	1983	13	48	0.3082	1.1679	1.92198	Up	2.97998e-06	6.66561e-05
CL364.Contig3_All	402	13	48	1.5204	5.7612	1.92192	Up	2.97998e-06	6.67054e-05
CL409.Contig3_All	1739	13	48	0.3515	1.3318	1.92178	Up	2.97998e-06	6.6693e-05
CL3681.Contig1_All	1645	16	59	0.4573	1.7305	1.91998	Up	2.1444e-07	6.02608e-06
CL16294.Contig1_All	763	19	70	1.1707	4.4266	1.91883	Up	1.56767e-08	5.2823e-07
CL3127.Contig2_All	1055	191	702	8.5116	32.1056	1.91532	Up	2.08014e-72	6.59072e-70
CL598.Contig5_All	1252	46	169	1.7274	6.513	1.91472	Up	1.26585e-18	9.92935e-17
Unigene26843_All	2173	15	55	0.3245	1.2212	1.91201	Up	6.03156e-07	1.56254e-05
Unigene15626_All	291	12	44	1.9387	7.2955	1.91192	Up	8.44606e-06	0.000171749
Unigene4150_All	1727	39	143	1.0617	3.9952	1.91189	Up	5.9436e-16	3.96785e-14
CL2680.Contig6_All	1386	12	44	0.4071	1.5317	1.91168	Up	8.44606e-06	0.00017172
CL14629.Contig1_All	3249	55	201	0.7959	2.985	1.90707	Up	9.22804e-22	8.69181e-20
CL12890.Contig2_All	2981	118	431	1.861	6.9761	1.90634	Up	7.67234e-45	1.49534e-42
Unigene1574_All	1117	63	230	2.6517	9.9351	1.90562	Up	1.16939e-24	1.24372e-22
CL12238.Contig2_All	549	17	62	1.4558	5.449	1.90418	Up	1.22896e-07	3.59983e-06
Unigene15353_All	511	17	62	1.5641	5.8542	1.90414	Up	1.22896e-07	3.59896e-06
Unigene14974_All	903	17	62	0.8851	3.3128	1.90414	Up	1.22896e-07	3.6007e-06
CL11793.Contig1_All	1949	14	51	0.3377	1.2626	1.90258	Up	1.7e-06	4.01163e-05
CL11565.Contig3_All	577	14	51	1.1407	4.2647	1.90252	Up	1.7e-06	4.01085e-05
Unigene27353_All	1743	28	102	0.7553	2.8236	1.90241	Up	1.03937e-11	5.04809e-10
CL5923.Contig4_All	1480	11	40	0.3494	1.3041	1.9001	Up	2.40164e-05	0.000435081
CL605.Contig12_All	1810	11	40	0.2857	1.0663	1.90004	Up	2.40164e-05	0.000434886
CL2953.Contig3_All	2568	11	40	0.2014	0.7516	1.8999	Up	2.40164e-05	0.000434951
Unigene25401_All	924	11	40	0.5597	2.0887	1.89988	Up	2.40164e-05	0.000435016
CL148.Contig12_All	2443	11	40	0.2117	0.79	1.89983	Up	2.40164e-05	0.000435211
Unigene23796_All	1479	11	40	0.3497	1.3049	1.89975	Up	2.40164e-05	0.000435146
CL5437.Contig4_All	1256	11	40	0.4118	1.5366	1.89973	Up	2.40164e-05	0.000434821
CL12836.Contig1_All	1546	63	229	1.9159	7.147	1.89932	Up	1.8646e-24	1.96755e-22
Unigene6631_All	1622	360	1308	10.4348	38.9093	1.89871	Up	8.38522e-132	5.09994e-129
CL485.Contig1_All	3964	30	109	0.3558	1.3267	1.8987	Up	2.16872e-12	1.11887e-10
Unigene30289_All	1196	1083	3934	42.5725	158.708	1.89838	Up	0	0
CL1097.Contig3_All	2199	19	69	0.4062	1.514	1.8981	Up	2.51748e-08	8.24623e-07
Unigene25277_All	471	38	138	3.7931	14.1369	1.89802	Up	2.6179e-15	1.67028e-13
CL4485.Contig11_All	282	126	457	21.0065	78.1922	1.89619	Up	4.05674e-47	8.48013e-45
CL4881.Contig10_All	1652	16	58	0.4553	1.694	1.89554	Up	3.44876e-07	9.33394e-06
CL832.Contig1_All	2903	32	116	0.5182	1.928	1.89552	Up	4.53314e-13	2.46478e-11
CL5821.Contig2_All	470	16	58	1.6005	5.9542	1.89539	Up	3.44876e-07	9.33603e-06
Unigene15011_All	665	16	58	1.1312	4.2083	1.89538	Up	3.44876e-07	9.33812e-06
CL4179.Contig2_All	2298	1428	5164	29.2153	108.426	1.89191	Up	0	0
Unigene6865_All	564	13	47	1.0837	4.0208	1.89152	Up	4.80276e-06	0.000102666
CL4899.Contig1_All	3142	57	206	0.8529	3.1634	1.89103	Up	4.96766e-22	4.76427e-20
CL14968.Contig3_All	1386	18	65	0.6106	2.2628	1.88981	Up	7.03988e-08	2.14462e-06
Unigene26651_All	5766	87	314	0.7094	2.6276	1.88907	Up	9.98942e-33	1.42745e-30
CL6395.Contig7_All	1623	212	765	6.1411	22.7425	1.88882	Up	2.59022e-77	8.61269e-75
CL15290.Contig1_All	1521	1779	6416	54.9894	203.531	1.88803	Up	0	0
CL8027.Contig2_All	842	68	245	3.7969	14.0394	1.88659	Up	7.77274e-26	8.58356e-24
CL15011.Contig3_All	2553	15	54	0.2762	1.0206	1.88563	Up	9.69496e-07	2.41393e-05
CL17710.Contig4_All	3208	20	72	0.2931	1.0829	1.88544	Up	1.44424e-08	4.89364e-07
Unigene1119_All	714	15	54	0.9877	3.6491	1.8854	Up	9.69496e-07	2.41293e-05
CL258.Contig10_All	4438	20	72	0.2119	0.7828	1.88526	Up	1.44424e-08	4.89501e-07
CL13573.Contig2_All	2619	15	54	0.2693	0.9948	1.88519	Up	9.69496e-07	2.41343e-05
CL978.Contig3_All	4491	20	72	0.2094	0.7735	1.88514	Up	1.44424e-08	4.89227e-07
CL12722.Contig5_All	2277	74	266	1.5279	5.6366	1.88328	Up	7.44692e-28	8.87129e-26
Unigene8668_All	2070	17	61	0.3861	1.4219	1.88077	Up	1.97125e-07	5.56405e-06
CL3320.Contig1_All	958	17	61	0.8343	3.0723	1.88068	Up	1.97125e-07	5.56665e-06
CL6501.Contig2_All	838	17	61	0.9538	3.5122	1.88062	Up	1.97125e-07	5.56535e-06
CL3824.Contig1_All	1164	29	104	1.1713	4.311	1.87991	Up	9.57912e-12	4.66368e-10
Unigene8953_All	624	12	43	0.9041	3.3249	1.87876	Up	1.36052e-05	0.000263342
CL4747.Contig1_All	1171	12	43	0.4818	1.7718	1.87871	Up	1.36052e-05	0.0002633
Unigene8847_All	2131	19	68	0.4192	1.5396	1.87684	Up	4.0312e-08	1.27458e-06
CL12586.Contig3_All	2109	26	93	0.5796	2.1277	1.87617	Up	1.27508e-10	5.49206e-09
CL4997.Contig3_All	1692	59	211	1.6394	6.017	1.87588	Up	2.66094e-22	2.57649e-20
CL4622.Contig5_All	2792	49	175	0.8251	3.0243	1.87396	Up	1.00099e-18	7.89781e-17
Unigene5869_All	1225	14	50	0.5373	1.9694	1.87396	Up	2.73078e-06	6.17092e-05
CL5863.Contig3_All	1671	14	50	0.3939	1.4437	1.87387	Up	2.73078e-06	6.16977e-05
Unigene15302_All	787	18	64	1.0753	3.9238	1.86751	Up	1.12646e-07	3.31887e-06
CL11845.Contig1_All	898	27	96	1.4136	5.1581	1.86747	Up	7.33582e-11	3.24279e-09
CL14368.Contig2_All	1964	18	64	0.4309	1.5723	1.86745	Up	1.12646e-07	3.31807e-06
Unigene27970_All	753	40	142	2.4975	9.0989	1.86521	Up	2.22116e-15	1.42466e-13
CL5882.Contig5_All	1926	11	39	0.2685	0.977	1.86344	Up	3.86624e-05	0.000662808
Unigene21355_All	2604	22	78	0.3972	1.4453	1.86343	Up	4.74842e-09	1.71403e-07
Unigene6259_All	900	11	39	0.5746	2.0908	1.86343	Up	3.86624e-05	0.000662714
CL7067.Contig3_All	1517	11	39	0.3409	1.2404	1.86338	Up	3.86624e-05	0.000662902
Unigene26889_All	2050	11	39	0.2523	0.9179	1.8632	Up	3.86624e-05	0.000662996
CL17918.Contig2_All	2302	24	85	0.4902	1.7816	1.86173	Up	9.8061e-10	3.8126e-08
CL5712.Contig4_All	1489	71	251	2.2418	8.1335	1.85922	Up	6.07544e-26	6.74614e-24
Unigene30887_All	1576	15	53	0.4475	1.6226	1.85835	Up	1.55273e-06	3.70528e-05
Unigene30538_All	1407	17	60	0.5681	2.0576	1.85675	Up	3.15166e-07	8.58939e-06
CL2833.Contig9_All	1839	19	67	0.4857	1.7579	1.85572	Up	6.43614e-08	1.97211e-06
CL13802.Contig3_All	2066	44	155	1.0013	3.6199	1.85408	Up	1.55829e-16	1.07467e-14
CL17237.Contig4_All	1987	178	627	4.2117	15.2253	1.854	Up	3.8812e-62	1.07742e-59
CL14228.Contig2_All	1507	23	81	0.7175	2.5934	1.85379	Up	2.72172e-09	1.00218e-07
CL5293.Contig3_All	1189	18	63	0.7117	2.5566	1.84489	Up	1.79687e-07	5.10637e-06
CL14513.Contig1_All	1022	12	42	0.552	1.9829	1.84487	Up	2.1819e-05	0.000399458
CL421.Contig2_All	1708	12	42	0.3303	1.1865	1.84486	Up	2.1819e-05	0.000399156
CL605.Contig23_All	1590	12	42	0.3548	1.2745	1.84485	Up	2.1819e-05	0.000399338
CL4540.Contig5_All	3811	102	357	1.2583	4.5199	1.84481	Up	7.25356e-36	1.12266e-33
Unigene17335_All	8922	20	70	0.1054	0.3786	1.8448	Up	3.67702e-08	1.17301e-06
CL7344.Contig1_All	1189	12	42	0.4745	1.7044	1.84478	Up	2.1819e-05	0.000399519
CL14405.Contig1_All	833	12	42	0.6773	2.4328	1.84475	Up	2.1819e-05	0.000399096
Unigene24459_All	1025	16	56	0.7339	2.6361	1.84475	Up	8.82996e-07	2.20809e-05
Unigene21711_All	875	12	42	0.6448	2.316	1.84471	Up	2.1819e-05	0.000399398
CL1122.Contig23_All	1923	16	56	0.3912	1.4051	1.84469	Up	8.82996e-07	2.20855e-05
CL3795.Contig1_All	1376	26	91	0.8884	3.1909	1.84468	Up	3.22896e-10	1.33155e-08
CL7759.Contig2_All	1903	12	42	0.2965	1.0649	1.84461	Up	2.1819e-05	0.000399217
CL2482.Contig2_All	2391	12	42	0.236	0.8476	1.8446	Up	2.1819e-05	0.000399277
CL4257.Contig1_All	804	245	857	14.3266	51.4305	1.84393	Up	1.14033e-83	4.18234e-81
CL8080.Contig1_All	1631	4019	14046	115.85	415.523	1.84267	Up	0	0
CL6935.Contig1_All	1396	45	157	1.5155	5.4264	1.8402	Up	1.4246e-16	9.8584e-15
Unigene27584_All	1922	33	115	0.8072	2.887	1.83857	Up	1.67281e-12	8.68576e-11
CL14462.Contig2_All	1220	50	174	1.9268	6.8815	1.83652	Up	3.65068e-18	2.76677e-16
Unigene18174_All	1194	25	87	0.9844	3.5157	1.8365	Up	8.93774e-10	3.49858e-08
CL8250.Contig3_All	1618	32	111	0.9298	3.3101	1.83188	Up	4.6069e-12	2.30789e-10
Unigene24372_All	987	30	104	1.429	5.0841	1.83099	Up	2.21016e-11	1.03523e-09
CL9714.Contig1_All	1106	123	426	5.2286	18.5845	1.8296	Up	5.051e-42	9.23471e-40
CL2665.Contig4_All	2755	13	45	0.2218	0.7881	1.82912	Up	1.23221e-05	0.000240701
CL16164.Contig1_All	1727	26	90	0.7078	2.5145	1.82886	Up	5.12096e-10	2.05847e-08
CL10479.Contig2_All	938	13	45	0.6516	2.3148	1.82883	Up	1.23221e-05	0.00024074
CL4384.Contig3_All	2222	37	128	0.7829	2.7795	1.82793	Up	1.15804e-13	6.59271e-12
CL340.Contig10_All	12776	79	273	0.2907	1.031	1.82644	Up	1.91769e-27	2.23822e-25
CL2525.Contig4_All	860	11	38	0.6013	2.132	1.82605	Up	6.19384e-05	0.000999146
CL2237.Contig3_All	813	11	38	0.6361	2.2552	1.82593	Up	6.19384e-05	0.000998879
CL15194.Contig1_All	1106	11	38	0.4676	1.6578	1.82592	Up	6.19384e-05	0.000998746
CL13077.Contig2_All	1150	11	38	0.4497	1.5943	1.82589	Up	6.19384e-05	0.000999013
CL11639.Contig2_All	2067	11	38	0.2502	0.887	1.82585	Up	6.19384e-05	0.000999279
CL16340.Contig3_All	2467	22	76	0.4193	1.4864	1.82577	Up	1.20008e-08	4.1054e-07
CL1122.Contig12_All	1771	40	138	1.0619	3.7597	1.82397	Up	1.39748e-14	8.50383e-13
CL258.Contig3_All	4167	20	69	0.2257	0.799	1.82379	Up	5.84182e-08	1.80325e-06
Unigene6467_All	1164	296	1021	11.9556	42.3223	1.82373	Up	7.20736e-98	3.13787e-95
CL10817.Contig3_All	3352	18	62	0.2525	0.8924	1.82141	Up	2.8571e-07	7.84135e-06
CL1279.Contig3_All	848	16	55	0.8871	3.1294	1.81872	Up	1.40543e-06	3.38245e-05
CL6202.Contig1_All	2145	148	508	3.2439	11.427	1.81665	Up	2.53648e-49	5.50175e-47
CL8001.Contig2_All	2902	14	48	0.2268	0.7981	1.81515	Up	6.96378e-06	0.000144076
CL14358.Contig2_All	1194	77	264	3.0319	10.6683	1.81504	Up	2.2378e-26	2.52656e-24
CL11196.Contig1_All	719	19	65	1.2424	4.3619	1.81183	Up	1.62577e-07	4.65073e-06
CL4159.Contig3_All	721	12	41	0.7825	2.7438	1.81001	Up	3.4831e-05	0.000604142
CL11798.Contig2_All	874	12	41	0.6455	2.2634	1.81	Up	3.4831e-05	0.000604055
CL451.Contig3_All	758	12	41	0.7443	2.6098	1.80998	Up	3.4831e-05	0.000603882
Unigene12569_All	872	12	41	0.647	2.2686	1.80996	Up	3.4831e-05	0.000603969
Unigene13991_All	1451	17	58	0.5508	1.9287	1.80803	Up	7.97566e-07	2.01108e-05
Unigene24567_All	807	17	58	0.9904	3.4678	1.80794	Up	7.97566e-07	2.0115e-05
CL16099.Contig1_All	2097	56	191	1.2555	4.3947	1.8075	Up	2.122e-19	1.75432e-17
Unigene5594_All	919	22	75	1.1255	3.9377	1.80679	Up	1.90012e-08	6.33721e-07
CL5831.Contig5_All	1536	44	150	1.3468	4.7119	1.80677	Up	1.53325e-15	9.92907e-14
CL17159.Contig2_All	1177	596	2031	23.8068	83.2587	1.80623	Up	2.84034e-190	2.49112e-187
CL6069.Contig1_All	1755	15	51	0.4018	1.4021	1.80304	Up	3.9383e-06	8.56078e-05
Unigene17433_All	1244	15	51	0.5669	1.9781	1.80295	Up	3.9383e-06	8.56232e-05
Unigene17949_All	1184	18	61	0.7147	2.4858	1.7983	Up	4.52802e-07	1.19738e-05
CL11806.Contig1_All	1009	18	61	0.8387	2.917	1.79826	Up	4.52802e-07	1.19712e-05
Unigene27619_All	858	13	44	0.7123	2.4744	1.79652	Up	1.96098e-05	0.000363857
Unigene30511_All	1967	13	44	0.3107	1.0793	1.7965	Up	1.96098e-05	0.000363634
Unigene31464_All	1189	13	44	0.514	1.7855	1.79649	Up	1.96098e-05	0.000363801
Unigene5853_All	953	13	44	0.6413	2.2277	1.79648	Up	1.96098e-05	0.00036369
Unigene690_All	1425	13	44	0.4289	1.4898	1.79641	Up	1.96098e-05	0.000363745
Unigene17108_All	967	34	115	1.653	5.7381	1.79549	Up	3.7801e-12	1.90394e-10
CL7773.Contig6_All	1076	21	71	0.9176	3.1838	1.79481	Up	5.26826e-08	1.6379e-06
Unigene3263_All	1573	21	71	0.6277	2.1778	1.79472	Up	5.26826e-08	1.63748e-06
Unigene1040_All	1558	234	791	7.0612	24.4966	1.7946	Up	1.36033e-74	4.44987e-72
Unigene30293_All	923	216	730	11.0023	38.1608	1.79429	Up	5.81966e-69	1.78322e-66
CL12890.Contig1_All	3437	45	152	0.6156	2.1338	1.79336	Up	1.38684e-15	9.005e-14
CL605.Contig13_All	1764	16	54	0.4264	1.477	1.79239	Up	2.22878e-06	5.1226e-05
CL5534.Contig10_All	1392	19	64	0.6417	2.2184	1.78955	Up	2.57178e-07	7.13432e-06
Unigene12257_All	733	30	101	1.9242	6.6483	1.78873	Up	8.68784e-11	3.81398e-09
CL1431.Contig2_All	1350	36	121	1.2537	4.3246	1.78637	Up	1.24305e-12	6.51582e-11
CL258.Contig11_All	4163	25	84	0.2823	0.9736	1.7861	Up	3.52898e-09	1.28846e-07
CL11310.Contig5_All	1115	64	215	2.6986	9.3038	1.78561	Up	2.58454e-21	2.38426e-19
Unigene24564_All	1282	14	47	0.5134	1.7689	1.7847	Up	1.10523e-05	0.000219293
CL8185.Contig9_All	1552	14	47	0.4241	1.4612	1.78468	Up	1.10523e-05	0.000219185
CL10000.Contig1_All	1982	14	47	0.3321	1.1442	1.78465	Up	1.10523e-05	0.000219221
Unigene6123_All	1024	14	47	0.6428	2.2146	1.7846	Up	1.10523e-05	0.000219149
CL3751.Contig7_All	3052	14	47	0.2157	0.743	1.78434	Up	1.10523e-05	0.000219257
CL15671.Contig2_All	912	895	3002	46.1382	158.822	1.78338	Up	2.1041e-275	2.62542e-272
CL9993.Contig2_All	923	20	67	1.0187	3.5024	1.78161	Up	1.4613e-07	4.22214e-06
CL187.Contig3_All	2426	23	77	0.4457	1.5314	1.78071	Up	1.709e-08	5.72661e-07
Unigene24145_All	2859	26	87	0.4276	1.4683	1.77981	Up	2.01414e-09	7.53329e-08
Unigene8829_All	1599	12	40	0.3528	1.207	1.7745	Up	5.5338e-05	0.000904365
Unigene18070_All	1405	18	60	0.6023	2.0605	1.77444	Up	7.15198e-07	1.82853e-05
CL504.Contig6_All	710	42	140	2.7811	9.5141	1.77441	Up	2.82488e-14	1.68012e-12
Unigene5018_All	1728	15	50	0.4081	1.3961	1.77441	Up	6.23542e-06	0.000130299
CL3221.Contig1_All	1677	87	290	2.439	8.3437	1.7744	Up	5.56164e-28	6.67138e-26
CL7978.Contig1_All	832	12	40	0.6781	2.3197	1.77437	Up	5.5338e-05	0.000904609
CL11587.Contig2_All	797	12	40	0.7079	2.4216	1.77434	Up	5.5338e-05	0.000904487
CL7156.Contig3_All	4062	952	3172	11.0187	37.6781	1.77377	Up	1.01947e-288	1.35593e-285
CL13101.Contig4_All	798	85	283	5.0078	17.1112	1.77269	Up	2.61248e-27	3.03743e-25
CL15550.Contig1_All	956	52	173	2.5573	8.7314	1.77159	Up	2.87956e-17	2.08821e-15
CL7703.Contig2_All	1191	34	113	1.3421	4.5779	1.77019	Up	9.32496e-12	4.54908e-10
CL14664.Contig3_All	1617	100	332	2.9075	9.9066	1.76861	Up	1.14475e-31	1.59806e-29
CL5712.Contig8_All	1008	41	136	1.9123	6.5099	1.76733	Up	7.71092e-14	4.44841e-12
CL17573.Contig2_All	1098	19	63	0.8135	2.7684	1.76684	Up	4.05508e-07	1.08225e-05
CL12516.Contig3_All	2133	13	43	0.2865	0.9727	1.76346	Up	3.1067e-05	0.000545421
CL6069.Contig3_All	1625	13	43	0.3761	1.2768	1.76334	Up	3.1067e-05	0.000545105
Unigene28890_All	327	13	43	1.8691	6.3448	1.76323	Up	3.1067e-05	0.000545026
CL560.Contig7_All	1018	13	43	0.6004	2.0381	1.76323	Up	3.1067e-05	0.000545342
CL16802.Contig2_All	2089	13	43	0.2926	0.9932	1.76315	Up	3.1067e-05	0.000545184
CL7415.Contig4_All	1935	13	43	0.3159	1.0722	1.76303	Up	3.1067e-05	0.000545263
CL12265.Contig1_All	1461	23	76	0.7401	2.5099	1.76184	Up	2.68716e-08	8.76172e-07
CL7658.Contig1_All	1139	23	76	0.9494	3.2195	1.76175	Up	2.68716e-08	8.76408e-07
CL2412.Contig1_All	1944	37	122	0.8948	3.028	1.75873	Up	1.75018e-12	9.07194e-11
Unigene11522_All	2746	44	145	0.7533	2.5478	1.75796	Up	1.45499e-14	8.82716e-13
CL5174.Contig1_All	4526	17	56	0.1766	0.597	1.75725	Up	1.99015e-06	4.62774e-05
Unigene23931_All	1375	24	79	0.8206	2.7722	1.75628	Up	1.52922e-08	5.15704e-07
CL340.Contig11_All	8516	114	375	0.6294	2.1247	1.75521	Up	3.32284e-35	5.04609e-33
Unigene8680_All	1361	14	46	0.4836	1.6308	1.75369	Up	1.7466e-05	0.000328153
Unigene14631_All	1601	14	46	0.4111	1.3863	1.75368	Up	1.7466e-05	0.000328102
Unigene1500_All	808	14	46	0.8146	2.7469	1.75364	Up	1.7466e-05	0.000328255
Unigene22063_All	835	21	69	1.1824	3.9871	1.75362	Up	1.30577e-07	3.8064e-06
CL2159.Contig1_All	1510	28	92	0.8718	2.9397	1.7536	Up	1.02907e-09	3.98565e-08
CL11497.Contig1_All	2151	14	46	0.306	1.0318	1.75356	Up	1.7466e-05	0.000328204
CL10104.Contig4_All	954	92	302	4.5339	15.2741	1.75226	Up	1.34436e-28	1.65358e-26
CL12991.Contig2_All	2130	18	59	0.3973	1.3365	1.75016	Up	1.12574e-06	2.76878e-05
Unigene28551_All	1201	29	95	1.1352	3.8166	1.74934	Up	5.87104e-10	2.34363e-08
Unigene27275_All	1428	29	95	0.9548	3.2099	1.74926	Up	5.87104e-10	2.34441e-08
CL8250.Contig1_All	1559	26	85	0.7841	2.6307	1.74634	Up	4.9577e-09	1.78426e-07
CL5907.Contig5_All	2675	26	85	0.457	1.5332	1.74628	Up	4.9577e-09	1.78479e-07
Unigene24541_All	1137	15	49	0.6202	2.0794	1.74536	Up	9.83214e-06	0.000197349
CL5867.Contig4_All	418	15	49	1.6871	5.6561	1.74526	Up	9.83214e-06	0.000197316
CL15407.Contig1_All	845	15	49	0.8346	2.7979	1.74519	Up	9.83214e-06	0.000197382
CL1809.Contig3_All	1924	30	98	0.7331	2.4576	1.74517	Up	3.35032e-10	1.37972e-08
CL2336.Contig3_All	2197	15	49	0.321	1.0761	1.74517	Up	9.83214e-06	0.000197251
CL605.Contig18_All	1796	15	49	0.3927	1.3164	1.7451	Up	9.83214e-06	0.000197283
CL4346.Contig23_All	3274	19	62	0.2728	0.9137	1.74388	Up	6.37262e-07	1.64281e-05
CL1095.Contig4_All	2356	19	62	0.3791	1.2697	1.74384	Up	6.37262e-07	1.64246e-05
CL8148.Contig3_All	2547	38	124	0.7014	2.349	1.74374	Up	1.56518e-12	8.14437e-11
CL6216.Contig19_All	1315	19	62	0.6793	2.2749	1.74368	Up	6.37262e-07	1.64211e-05
CL4820.Contig2_All	3051	19	62	0.2928	0.9805	1.7436	Up	6.37262e-07	1.64316e-05
CL16294.Contig2_All	834	23	75	1.2966	4.339	1.74263	Up	4.2133e-08	1.32834e-06
Unigene30485_All	2937	23	75	0.3682	1.2321	1.74256	Up	4.2133e-08	1.32799e-06
CL9002.Contig7_All	3017	27	88	0.4207	1.4074	1.74217	Up	2.82424e-09	1.03835e-07
CL4858.Contig4_All	2029	176	573	4.0781	13.626	1.74039	Up	2.62508e-52	6.05183e-50
CL416.Contig2_All	2181	90	293	1.9401	6.482	1.74031	Up	1.52499e-27	1.79547e-25
Unigene12404_All	866	99	322	5.3746	17.9405	1.73899	Up	4.40746e-30	5.76701e-28
CL1899.Contig1_All	2102	20	65	0.4473	1.492	1.73793	Up	3.60996e-07	9.73539e-06
CL16340.Contig4_All	2607	24	78	0.4328	1.4436	1.7379	Up	2.395e-08	7.86846e-07
Unigene24646_All	2060	80	260	1.8258	6.0898	1.73787	Up	1.43184e-24	1.51751e-22
CL598.Contig6_All	1010	40	130	1.862	6.2104	1.73783	Up	5.1278e-13	2.77812e-11
CL11965.Contig1_All	1097	24	78	1.0286	3.4307	1.73782	Up	2.395e-08	7.8706e-07
CL17690.Contig1_All	1514	16	52	0.4969	1.6572	1.73772	Up	5.54132e-06	0.000117109
Unigene13958_All	5141	28	91	0.2561	0.8541	1.7377	Up	1.60937e-09	6.10235e-08
CL1486.Contig28_All	2013	526	1708	12.285	40.9393	1.73659	Up	7.05374e-152	4.85077e-149
CL10659.Contig1_All	2938	13	42	0.208	0.6898	1.72959	Up	4.89876e-05	0.000816908
Unigene24042_All	1460	13	42	0.4186	1.388	1.72936	Up	4.89876e-05	0.00081702
CL15263.Contig5_All	2437	26	84	0.5016	1.6631	1.72927	Up	7.74858e-09	2.71364e-07
CL2609.Contig1_All	684	13	42	0.8936	2.9627	1.72921	Up	4.89876e-05	0.000817133
Unigene5785_All	1676	13	42	0.3647	1.2091	1.72915	Up	4.89876e-05	0.000816795
Unigene5480_All	519	35	113	3.1705	10.5053	1.72834	Up	2.03412e-11	9.561e-10
CL4540.Contig2_All	3777	66	213	0.8215	2.721	1.7278	Up	2.99522e-20	2.60806e-18
CL5656.Contig1_All	2554	22	71	0.405	1.3413	1.72764	Up	1.16069e-07	3.41057e-06
Unigene5940_All	2168	18	58	0.3903	1.2908	1.72561	Up	1.76564e-06	4.15356e-05
CL416.Contig6_All	3980	90	290	1.0631	3.5157	1.72553	Up	5.7046e-27	6.58193e-25
CL11538.Contig2_All	1573	18	58	0.538	1.7791	1.72547	Up	1.76564e-06	4.15195e-05
CL8500.Contig3_All	3041	18	58	0.2783	0.9203	1.72546	Up	1.76564e-06	4.15275e-05
Unigene17883_All	1485	18	58	0.5699	1.8845	1.7254	Up	1.76564e-06	4.15114e-05
CL4408.Contig3_All	1715	14	45	0.3838	1.266	1.72185	Up	2.74792e-05	0.00048903
CL16404.Contig2_All	1585	14	45	0.4153	1.3699	1.72184	Up	2.74792e-05	0.000489101
CL12867.Contig4_All	1782	19	61	0.5013	1.6517	1.72021	Up	9.9805e-07	2.47636e-05
Unigene17899_All	1953	19	61	0.4574	1.507	1.72015	Up	9.9805e-07	2.47586e-05
CL6242.Contig2_All	1245	24	77	0.9063	2.9841	1.71924	Up	3.74052e-08	1.19107e-06
CL1396.Contig2_All	3852	45	144	0.5492	1.8037	1.71556	Up	4.90312e-14	2.8738e-12
CL4503.Contig2_All	1099	25	80	1.0695	3.5123	1.71548	Up	2.1251e-08	7.03713e-07
CL12885.Contig1_All	833	25	80	1.411	4.6338	1.71548	Up	2.1251e-08	7.03521e-07
Unigene9202_All	463	20	64	2.0309	6.6695	1.71546	Up	5.6463e-07	1.46871e-05
CL6022.Contig4_All	1815	20	64	0.5181	1.7014	1.71542	Up	5.6463e-07	1.46902e-05
Unigene26984_All	3085	15	48	0.2286	0.7507	1.71541	Up	1.54383e-05	0.000294583
CL8263.Contig5_All	1439	15	48	0.4901	1.6094	1.71537	Up	1.54383e-05	0.000294536
CL15263.Contig2_All	2324	25	80	0.5058	1.6609	1.71533	Up	2.1251e-08	7.03906e-07
CL9362.Contig5_All	612	71	227	5.4543	17.8966	1.71422	Up	2.90716e-21	2.67373e-19
CL82.Contig34_All	5172	87	278	0.7908	2.5935	1.71352	Up	1.11359e-25	1.22084e-23
CL3824.Contig5_All	1634	62	198	1.7839	5.8467	1.71259	Up	1.02734e-18	8.09519e-17
CL1185.Contig5_All	1600	130	415	3.8199	12.5148	1.71203	Up	1.65498e-37	2.69229e-35
CL6157.Contig2_All	972	52	166	2.5152	8.2402	1.71201	Up	6.40004e-16	4.26551e-14
CL17289.Contig6_All	794	232	740	13.7372	44.9684	1.71082	Up	1.72339e-65	5.01411e-63
CL15036.Contig2_All	384	280	893	34.2814	112.206	1.71065	Up	1.18883e-78	4.04177e-76
CL6976.Contig1_All	1466	70	223	2.2449	7.3395	1.70903	Up	7.83542e-21	7.0352e-19
Unigene11662_All	985	17	54	0.8114	2.6452	1.70489	Up	4.89258e-06	0.000104475
CL15011.Contig2_All	2418	23	73	0.4472	1.4567	1.70371	Up	1.02686e-07	3.04693e-06
CL1525.Contig1_All	1584	23	73	0.6827	2.2236	1.70357	Up	1.02686e-07	3.04618e-06
CL7752.Contig2_All	3974	35	111	0.4141	1.3477	1.70245	Up	4.9138e-11	2.21584e-09
CL15278.Contig1_All	1521	42	133	1.2982	4.2191	1.70042	Up	6.29332e-13	3.38383e-11
CL11391.Contig3_All	1778	24	76	0.6346	2.0624	1.7004	Up	5.8254e-08	1.80001e-06
CL1935.Contig1_All	1026	24	76	1.0998	3.5741	1.70034	Up	5.8254e-08	1.79955e-06
CL3751.Contig6_All	3283	18	57	0.2578	0.8377	1.70018	Up	2.75914e-06	6.22107e-05
CL1900.Contig1_All	2254	85	269	1.773	5.7583	1.69945	Up	1.24465e-24	1.3226e-22
CL17155.Contig4_All	1192	49	155	1.9326	6.2741	1.69887	Up	8.1646e-15	5.04692e-13
CL2892.Contig1_All	338	25	79	3.4774	11.2773	1.69734	Up	3.30666e-08	1.06271e-06
Unigene9397_All	695	25	79	1.6912	5.4845	1.69731	Up	3.30666e-08	1.06214e-06
CL6146.Contig3_All	1920	25	79	0.6122	1.9853	1.69728	Up	3.30666e-08	1.06242e-06
CL6306.Contig2_All	3239	19	60	0.2758	0.8938	1.69633	Up	1.55762e-06	3.71476e-05
CL16735.Contig1_All	1048	19	60	0.8524	2.7624	1.69632	Up	1.55762e-06	3.71622e-05
Unigene257_All	1837	19	60	0.4863	1.5759	1.69626	Up	1.55762e-06	3.71549e-05
CL1368.Contig4_All	832	26	82	1.4692	4.7554	1.69454	Up	1.87798e-08	6.26854e-07
CL7703.Contig1_All	1247	26	82	0.9803	3.1728	1.69446	Up	1.87798e-08	6.27027e-07
CL11076.Contig1_All	2066	34	107	0.7737	2.4989	1.69145	Up	1.33514e-10	5.73442e-09
CL4899.Contig2_All	3180	96	302	1.4193	4.5822	1.69086	Up	2.8209e-27	3.27033e-25
CL14208.Contig1_All	3293	131	412	1.8703	6.0367	1.69049	Up	1.28692e-36	2.03342e-34
Unigene30287_All	2348	14	44	0.2803	0.9042	1.68967	Up	4.30346e-05	0.00073052
CL639.Contig6_All	5134	21	66	0.1923	0.6203	1.68961	Up	4.97782e-07	1.3069e-05
CL1160.Contig11_All	1278	14	44	0.515	1.6612	1.68958	Up	4.30346e-05	0.000730417
Unigene15073_All	847	14	44	0.7771	2.5065	1.6895	Up	4.30346e-05	0.000730622
Unigene38615_All	684	14	44	0.9623	3.1038	1.68948	Up	4.30346e-05	0.000730725
CL5245.Contig3_All	3726	21	66	0.265	0.8547	1.68943	Up	4.97782e-07	1.30718e-05
Unigene11663_All	1050	14	44	0.6269	2.0219	1.6894	Up	4.30346e-05	0.000730827
CL5411.Contig3_All	2574	43	135	0.7854	2.5306	1.68798	Up	5.567e-13	3.00397e-11
CL15671.Contig1_All	916	402	1261	20.633	66.4226	1.68672	Up	3.68008e-108	1.7888e-105
CL7658.Contig3_All	1098	22	69	0.942	3.0321	1.68652	Up	2.81752e-07	7.74853e-06
CL6034.Contig4_All	1691	59	185	1.6404	5.2787	1.68614	Up	3.11052e-17	2.2503e-15
CL15656.Contig2_All	1572	15	47	0.4486	1.4426	1.68517	Up	2.41354e-05	0.000436714
CL5533.Contig2_All	3358	23	72	0.322	1.0345	1.6838	Up	1.59593e-07	4.57727e-06
CL3020.Contig7_All	963	16	50	0.7811	2.5052	1.68135	Up	1.35575e-05	0.000262544
Unigene3246_All	1159	16	50	0.649	2.0815	1.68133	Up	1.35575e-05	0.000262586
CL6912.Contig5_All	1804	64	200	1.6679	5.3492	1.68129	Up	1.92713e-18	1.48849e-16
Unigene18263_All	666	16	50	1.1295	3.6224	1.68126	Up	1.35575e-05	0.000262628
Unigene5346_All	3118	16	50	0.2413	0.7737	1.68095	Up	1.35575e-05	0.000262502
CL3824.Contig2_All	727	41	128	2.6514	8.4952	1.67989	Up	2.63374e-12	1.34786e-10
Unigene24289_All	922	17	53	0.8669	2.7736	1.67782	Up	7.62638e-06	0.000156395
CL17084.Contig4_All	1629	556	1733	16.0467	51.3303	1.67753	Up	8.42922e-147	5.63654e-144
CL17022.Contig1_All	1435	26	81	0.8518	2.7235	1.67688	Up	2.91186e-08	9.44349e-07
CL1651.Contig2_All	2682	26	81	0.4558	1.4572	1.67673	Up	2.91186e-08	9.44096e-07
CL7104.Contig11_All	2342	18	56	0.3613	1.1537	1.675	Up	4.29548e-06	9.27555e-05
Unigene8533_All	917	45	140	2.3071	7.3664	1.67488	Up	2.80864e-13	1.55294e-11
Unigene1698_All	591	27	84	2.1479	6.8578	1.67482	Up	1.65347e-08	5.55747e-07
CL3309.Contig3_All	1666	18	56	0.508	1.6218	1.6747	Up	4.29548e-06	9.2739e-05
CL16781.Contig1_All	1203	56	174	2.1885	6.9788	1.67304	Up	3.92856e-16	2.646e-14
CL8379.Contig5_All	3714	39	121	0.4937	1.572	1.67089	Up	1.24666e-11	5.99712e-10
Unigene33091_All	423	39	121	4.3347	13.802	1.67087	Up	1.24666e-11	5.9995e-10
CL258.Contig20_All	4890	30	93	0.2884	0.9176	1.66979	Up	3.03652e-09	1.11403e-07
Unigene3106_All	3237	20	62	0.2905	0.9242	1.66967	Up	1.36729e-06	3.29786e-05
Unigene15781_All	538	20	62	1.7478	5.5604	1.66965	Up	1.36729e-06	3.29721e-05
CL8616.Contig2_All	2483	72	223	1.3633	4.3334	1.6684	Up	3.47582e-20	3.01785e-18
CL2938.Contig1_All	3036	31	96	0.4801	1.5257	1.66806	Up	1.72754e-09	6.53201e-08
CL6395.Contig6_All	2148	67	207	1.4665	4.6498	1.66479	Up	8.6058e-19	6.82559e-17
CL17084.Contig1_All	744	539	1664	34.0603	107.914	1.66371	Up	2.11958e-139	1.35735e-136
CL6238.Contig2_All	2201	70	216	1.4952	4.7351	1.66306	Up	1.62312e-19	1.3539e-17
Unigene17789_All	2992	37	114	0.5814	1.8384	1.66085	Up	5.90412e-11	2.63688e-09
CL14019.Contig1_All	1167	25	77	1.0072	3.1836	1.66031	Up	7.93854e-08	2.40086e-06
Unigene8846_All	3498	26	80	0.3495	1.1035	1.65872	Up	4.50246e-08	1.41251e-06
CL13969.Contig2_All	2011	184	566	4.3017	13.58	1.6585	Up	2.15732e-48	4.60506e-46
Unigene8812_All	1139	207	636	8.5443	26.942	1.65682	Up	4.34264e-54	1.03874e-51
CL11140.Contig3_All	1848	42	129	1.0685	3.3681	1.65635	Up	3.57196e-12	1.80135e-10
CL13435.Contig3_All	1353	29	89	1.0077	3.1739	1.65519	Up	8.24276e-09	2.87921e-07
Unigene11901_All	1382	31	95	1.0546	3.3167	1.65305	Up	2.6643e-09	9.83435e-08
CL18094.Contig11_All	3028	16	49	0.2484	0.7808	1.65229	Up	2.10718e-05	0.000387184
CL14269.Contig1_All	714	16	49	1.0535	3.3113	1.65221	Up	2.10718e-05	0.000387243
CL13289.Contig2_All	635	16	49	1.1846	3.7232	1.65214	Up	2.10718e-05	0.000387302
Unigene15941_All	679	16	49	1.1079	3.4819	1.65205	Up	2.10718e-05	0.000387361
CL1455.Contig2_All	3876	16	49	0.1941	0.61	1.65201	Up	2.10718e-05	0.00038742
CL17084.Contig3_All	882	398	1218	21.2152	66.6308	1.65109	Up	1.87394e-101	8.46299e-99
CL3751.Contig10_All	2801	17	52	0.2853	0.8957	1.65054	Up	1.18394e-05	0.000232662
CL9769.Contig1_All	1432	17	52	0.5581	1.7521	1.65049	Up	1.18394e-05	0.000232586
CL2005.Contig4_All	1351	17	52	0.5916	1.8571	1.65036	Up	1.18394e-05	0.000232624
CL3751.Contig12_All	3169	18	55	0.267	0.8374	1.64908	Up	6.66138e-06	0.000138364
CL2257.Contig6_All	3468	18	55	0.244	0.7652	1.64896	Up	6.66138e-06	0.00013834
CL17359.Contig2_All	1518	37	113	1.1459	3.5917	1.64819	Up	9.08522e-11	3.98121e-09
Unigene30847_All	1505	949	2898	29.6457	92.909	1.648	Up	4.5322e-238	4.89773e-235
CL189.Contig2_All	1577	19	58	0.5664	1.7746	1.6476	Up	3.7527e-06	8.18527e-05
CL2891.Contig2_All	1464	39	119	1.2524	3.9219	1.64686	Up	2.9541e-11	1.36519e-09
CL2048.Contig5_All	2187	20	61	0.4299	1.3458	1.64639	Up	2.1165e-06	4.89708e-05
CL524.Contig7_All	3662	60	183	0.7703	2.4112	1.64626	Up	1.53269e-16	1.05762e-14
CL15780.Contig2_All	3066	20	61	0.3067	0.96	1.64621	Up	2.1165e-06	4.89615e-05
Unigene53554_All	505	21	64	1.9551	6.1148	1.64506	Up	1.19492e-06	2.92054e-05
CL8151.Contig1_All	1504	22	67	0.6877	2.1494	1.64408	Up	6.75266e-07	1.73156e-05
CL5369.Contig1_All	2121	24	73	0.532	1.6607	1.64229	Up	2.16194e-07	6.06973e-06
CL6819.Contig8_All	2708	25	76	0.434	1.3541	1.64157	Up	1.22469e-07	3.58905e-06
CL4105.Contig1_All	1392	77	234	2.6007	8.111	1.64098	Up	1.19456e-20	1.06231e-18
CL6195.Contig2_All	786	26	79	1.5552	4.8495	1.64074	Up	6.94228e-08	2.11862e-06
CL13824.Contig1_All	603	26	79	2.0272	6.3213	1.64073	Up	6.94228e-08	2.11809e-06
Unigene20364_All	1744	27	82	0.7279	2.2686	1.63999	Up	3.93782e-08	1.24668e-06
Unigene27812_All	989	28	85	1.331	4.1469	1.63952	Up	2.23496e-08	7.37872e-07
CL3375.Contig1_All	1677	28	85	0.785	2.4456	1.63942	Up	2.23496e-08	7.3747e-07
CL15711.Contig2_All	1120	28	85	1.1754	3.6618	1.6394	Up	2.23496e-08	7.37671e-07
Unigene30487_All	1235	119	361	4.5301	14.1038	1.63847	Up	6.01526e-31	8.14368e-29
CL8382.Contig1_All	1078	61	185	2.6604	8.2804	1.63806	Up	1.34452e-16	9.33625e-15
CL7850.Contig1_All	1130	44	133	1.8307	5.679	1.63324	Up	2.74364e-12	1.40233e-10
CL3734.Contig3_All	851	4199	12619	231.979	715.47	1.6249	Up	0	0
CL379.Contig3_All	5226	15	45	0.1349	0.4155	1.62296	Up	5.81866e-05	0.000946318
Unigene4014_All	8279	17	51	0.0965	0.2972	1.62283	Up	1.83031e-05	0.000341705
CL1808.Contig4_All	4704	15	45	0.1499	0.4616	1.62264	Up	5.81866e-05	0.000946445
CL17839.Contig5_All	2326	18	54	0.3638	1.1202	1.62254	Up	1.02893e-05	0.000205434
Unigene5786_All	2188	20	60	0.4297	1.3231	1.62252	Up	3.26432e-06	7.23079e-05
Unigene24115_All	2383	22	66	0.434	1.3363	1.62248	Up	1.0402e-06	2.57198e-05
Unigene17773_All	2413	47	141	0.9157	2.8194	1.62244	Up	7.82234e-13	4.17075e-11
CL300.Contig14_All	1532	23	69	0.7058	2.1731	1.62242	Up	5.8802e-07	1.52529e-05
CL8639.Contig1_All	783	21	63	1.2609	3.8822	1.62242	Up	1.84178e-06	4.31757e-05
CL7292.Contig3_All	1479	24	72	0.7629	2.3489	1.62242	Up	3.32686e-07	9.02218e-06
CL7942.Contig5_All	1065	18	54	0.7946	2.4465	1.62242	Up	1.02893e-05	0.000205468
CL7415.Contig6_All	2121	49	147	1.0861	3.344	1.62242	Up	2.55422e-13	1.41615e-11
CL3824.Contig3_All	678	17	51	1.1788	3.6294	1.62241	Up	1.83031e-05	0.000341652
CL4196.Contig3_All	380	20	60	2.4744	7.6184	1.62241	Up	3.26432e-06	7.23212e-05
Unigene31229_All	1299	53	159	1.9182	5.9059	1.6224	Up	2.7296e-14	1.62584e-12
CL12962.Contig2_All	3895	50	150	0.6035	1.8581	1.6224	Up	1.45998e-13	8.26116e-12
CL15455.Contig2_All	1612	17	51	0.4958	1.5265	1.6224	Up	1.83031e-05	0.000341758
CL6668.Contig2_All	782	15	45	0.9018	2.7765	1.62239	Up	5.81866e-05	0.000946572
CL15100.Contig1_All	607	17	51	1.3167	4.0539	1.62238	Up	1.83031e-05	0.0003416
CL8552.Contig1_All	1180	49	147	1.9523	6.0108	1.62238	Up	2.55422e-13	1.4168e-11
Unigene8774_All	432	33	99	3.5914	11.0573	1.62238	Up	2.03444e-09	7.60217e-08
CL10026.Contig1_All	709	1177	3531	78.0481	240.297	1.62238	Up	3.32572e-283	4.37524e-280
CL13591.Contig1_All	595	25	75	1.9754	6.0819	1.62238	Up	1.88371e-07	5.33561e-06
Unigene1120_All	1150	113	339	4.6197	14.2232	1.62238	Up	9.03148e-29	1.1177e-26
CL7090.Contig2_All	1027	19	57	0.8698	2.6779	1.62235	Up	5.79196e-06	0.000121937
Unigene23435_All	2437	26	78	0.5016	1.5443	1.62234	Up	1.06734e-07	3.16007e-06
CL2137.Contig2_All	1944	48	144	1.1609	3.5741	1.62234	Up	4.46944e-13	2.43233e-11
Unigene1403_All	975	18	54	0.868	2.6723	1.62232	Up	1.02893e-05	0.000205502
CL783.Contig19_All	2327	19	57	0.3839	1.1819	1.62231	Up	5.79196e-06	0.000121916
Unigene27663_All	1515	17	51	0.5276	1.6243	1.6223	Up	1.83031e-05	0.000341811
CL10648.Contig2_All	1564	16	48	0.481	1.4808	1.62227	Up	3.2607e-05	0.000568663
Unigene30541_All	2383	16	48	0.3157	0.9719	1.62225	Up	3.2607e-05	0.000568581
CL4506.Contig12_All	3809	16	48	0.1975	0.608	1.62222	Up	3.2607e-05	0.000568499
Unigene18671_All	1248	63	188	2.3733	7.2684	1.61474	Up	1.57174e-16	1.08333e-14
Unigene23835_All	4494	58	173	0.6068	1.8574	1.61399	Up	2.55444e-15	1.63065e-13
CL5931.Contig2_All	2304	812	2420	16.5694	50.6791	1.61287	Up	4.12972e-193	3.73009e-190
CL1992.Contig1_All	568	48	143	3.9731	12.1474	1.61231	Up	6.8253e-13	3.65849e-11
CL5710.Contig5_All	2018	1232	3666	28.7026	87.6531	1.61062	Up	6.73856e-291	9.06209e-288
CL2776.Contig3_All	2410	67	199	1.307	3.9841	1.60799	Up	2.57856e-17	1.87442e-15
CL9091.Contig5_All	3271	31	92	0.4456	1.3571	1.60671	Up	9.63118e-09	3.33245e-07
CL17758.Contig1_All	2731	31	92	0.5337	1.6254	1.60669	Up	9.63118e-09	3.3315e-07
CL6787.Contig7_All	1255	29	86	1.0864	3.3064	1.60571	Up	2.98534e-08	9.65592e-07
CL5712.Contig7_All	855	57	169	3.1343	9.5371	1.60541	Up	6.80128e-15	4.23228e-13
CL605.Contig10_All	2320	28	83	0.5674	1.7262	1.60516	Up	5.26026e-08	1.63625e-06
Unigene17697_All	1291	28	83	1.0197	3.102	1.60505	Up	5.26026e-08	1.63583e-06
CL16784.Contig2_All	3010	26	77	0.4061	1.2343	1.60379	Up	1.63617e-07	4.67383e-06
CL4395.Contig1_All	1658	26	77	0.7373	2.2408	1.60369	Up	1.63617e-07	4.67494e-06
CL12722.Contig4_All	2186	47	139	1.0108	3.068	1.6018	Up	1.82146e-12	9.42524e-11
CL13915.Contig6_All	1599	70	207	2.0582	6.2462	1.6016	Up	7.38282e-18	5.52949e-16
Unigene4941_All	10882	93	275	0.4018	1.2193	1.6015	Up	3.15998e-23	3.16084e-21
CL15263.Contig1_All	2342	22	65	0.4416	1.3391	1.60045	Up	1.59686e-06	3.79786e-05
CL16345.Contig2_All	1048	22	65	0.9869	2.9926	1.60042	Up	1.59686e-06	3.79712e-05
CL3483.Contig1_All	1209	22	65	0.8555	2.5941	1.60039	Up	1.59686e-06	3.79637e-05
CL10820.Contig2_All	1359	63	186	2.1795	6.6037	1.59928	Up	3.64306e-16	2.45644e-14
Unigene23675_All	2071	20	59	0.454	1.3746	1.59825	Up	5.01588e-06	0.000106788
Unigene12732_All	3717	40	118	0.5059	1.5317	1.59821	Up	9.23474e-11	4.04527e-09
CL9603.Contig3_All	3644	19	56	0.2451	0.7415	1.59708	Up	8.90448e-06	0.000179923
Unigene6762_All	467	19	56	1.9128	5.7859	1.59686	Up	8.90448e-06	0.000179953
Unigene13956_All	5402	37	109	0.322	0.9736	1.59627	Up	4.9888e-10	2.01069e-08
Unigene24200_All	1672	18	53	0.5061	1.5295	1.59557	Up	1.58277e-05	0.000301539
CL15336.Contig1_All	1680	18	53	0.5037	1.5222	1.59552	Up	1.58277e-05	0.000301634
CL11671.Contig2_All	558	18	53	1.5166	4.5829	1.59542	Up	1.58277e-05	0.000301397
Unigene11796_All	1348	18	53	0.6278	1.8971	1.59542	Up	1.58277e-05	0.000301444
CL12323.Contig1_All	731	18	53	1.1577	3.4983	1.59539	Up	1.58277e-05	0.000301492
Unigene14763_All	1760	36	106	0.9617	2.906	1.59538	Up	8.75958e-10	3.43328e-08
CL14393.Contig1_All	974	18	53	0.8689	2.6255	1.59533	Up	1.58277e-05	0.000301682
CL18080.Contig4_All	2269	18	53	0.373	1.127	1.59524	Up	1.58277e-05	0.000301587
CL831.Contig2_All	2530	17	50	0.3159	0.9536	1.59392	Up	2.81734e-05	0.000499401
Unigene11035_All	1408	17	50	0.5676	1.7134	1.59392	Up	2.81734e-05	0.000499474
CL16813.Contig3_All	3657	34	100	0.4371	1.3194	1.59385	Up	2.70364e-09	9.9674e-08
CL13435.Contig2_All	1185	51	150	2.0234	6.1076	1.59382	Up	2.956e-13	1.63143e-11
CL10397.Contig1_All	1733	34	100	0.9224	2.7842	1.5938	Up	2.70364e-09	9.97043e-08
CL3913.Contig3_All	996	17	50	0.8025	2.4222	1.59374	Up	2.81734e-05	0.000499255
CL17710.Contig2_All	1961	17	50	0.4076	1.2302	1.59367	Up	2.81734e-05	0.000499328
CL6510.Contig6_All	1649	50	147	1.4255	4.3012	1.59327	Up	5.1714e-13	2.79924e-11
CL479.Contig4_All	1708	16	47	0.4404	1.3277	1.59204	Up	5.02268e-05	0.00083321
CL12896.Contig2_All	1246	16	47	0.6037	1.82	1.59203	Up	5.02268e-05	0.000832982
Unigene21907_All	1104	64	188	2.7255	8.2165	1.592	Up	3.17044e-16	2.14253e-14
CL7343.Contig4_All	583	16	47	1.2903	3.8898	1.59199	Up	5.02268e-05	0.000833096
CL504.Contig12_All	753	16	47	0.999	3.0116	1.59197	Up	5.02268e-05	0.000833324
CL4318.Contig3_All	1742	31	91	0.8367	2.5205	1.59093	Up	1.47071e-08	4.97777e-07
CL3127.Contig3_All	1086	244	716	10.5631	31.8111	1.5905	Up	2.65292e-57	6.77407e-55
CL6395.Contig1_All	1720	151	443	4.1274	12.4271	1.59018	Up	4.34962e-36	6.78412e-34
CL1326.Contig1_All	1090	30	88	1.294	3.8954	1.58993	Up	2.58904e-08	8.45546e-07
Unigene14818_All	1203	29	85	1.1334	3.4092	1.58878	Up	4.56012e-08	1.42801e-06
CL725.Contig4_All	698	71	208	4.7823	14.3782	1.58811	Up	9.75912e-18	7.25984e-16
CL2981.Contig5_All	5134	27	79	0.2473	0.7425	1.58613	Up	1.41714e-07	4.10435e-06
Unigene8779_All	1339	26	76	0.9129	2.7386	1.58491	Up	2.50062e-07	6.95445e-06
CL716.Contig16_All	1106	25	73	1.0627	3.1847	1.58342	Up	4.41556e-07	1.16892e-05
CL3572.Contig5_All	2502	25	73	0.4698	1.4078	1.58332	Up	4.41556e-07	1.16917e-05
CL512.Contig12_All	2019	37	108	0.8616	2.581	1.58284	Up	7.59588e-10	2.99366e-08
Unigene5155_All	1837	24	70	0.6142	1.8386	1.58183	Up	7.80288e-07	1.97327e-05
CL2274.Contig1_All	1675	24	70	0.6736	2.0164	1.58182	Up	7.80288e-07	1.97368e-05
CL9445.Contig6_All	1254	480	1400	17.996	53.8675	1.58174	Up	1.89527e-109	9.36288e-107
CL4004.Contig3_All	2180	24	70	0.5176	1.5493	1.58171	Up	7.80288e-07	1.97409e-05
CL11899.Contig3_All	1860	47	137	1.188	3.5539	1.58087	Up	4.2121e-12	2.11624e-10
CL725.Contig6_All	771	58	169	3.5368	10.5762	1.5803	Up	1.36539e-14	8.31693e-13
CL8733.Contig3_All	1171	23	67	0.9234	2.7607	1.58001	Up	1.38e-06	3.32655e-05
CL4172.Contig1_All	1039	22	64	0.9955	2.9721	1.57799	Up	2.44284e-06	5.56178e-05
CL1459.Contig3_All	1006	64	186	2.991	8.9209	1.57656	Up	7.29136e-16	4.81711e-14
CL12327.Contig3_All	4847	83	241	0.8051	2.3991	1.57525	Up	4.29744e-20	3.70728e-18
Unigene15147_All	1495	31	90	0.9749	2.9047	1.57506	Up	2.24002e-08	7.38737e-07
Unigene30458_All	2697	51	148	0.889	2.6477	1.57448	Up	6.81298e-13	3.65512e-11
CL5022.Contig3_All	1309	439	1273	15.7673	46.9229	1.57336	Up	6.17998e-99	2.72986e-96
CL6395.Contig8_All	987	105	304	5.0015	14.8612	1.57112	Up	7.447e-25	7.9764e-23
Unigene11695_All	1329	19	55	0.6721	1.9968	1.57094	Up	1.36346e-05	0.000263742
Unigene9312_All	750	19	55	1.191	3.5383	1.57088	Up	1.36346e-05	0.0002637
CL16322.Contig2_All	644	38	110	2.7741	8.2414	1.57087	Up	6.5743e-10	2.60973e-08
CL10026.Contig2_All	827	359	1039	20.409	60.6186	1.57056	Up	6.9832e-81	2.47134e-78
CL3273.Contig6_All	1816	137	396	3.5468	10.5214	1.56874	Up	7.88292e-32	1.10427e-29
CL11218.Contig1_All	3351	27	78	0.3788	1.1231	1.56798	Up	2.15906e-07	6.06305e-06
Unigene24353_All	1965	45	130	1.0767	3.1921	1.56789	Up	1.9587e-11	9.22442e-10
CL3351.Contig10_All	476	26	75	2.568	7.6024	1.56581	Up	3.81008e-07	1.02204e-05
CL10954.Contig4_All	1840	60	173	1.5331	4.5365	1.56513	Up	1.02573e-14	6.30508e-13
CL16569.Contig3_All	2670	196	565	3.4513	10.2102	1.5648	Up	1.49507e-44	2.89062e-42
CL3575.Contig2_All	3976	17	49	0.201	0.5946	1.56472	Up	4.31732e-05	0.000732051
CL2336.Contig2_All	2213	25	72	0.5311	1.5698	1.56353	Up	6.7284e-07	1.7257e-05
CL2822.Contig2_All	1301	361	1039	13.0455	38.5331	1.56255	Up	2.7112e-80	9.48395e-78
CL497.Contig4_All	1112	41	118	1.7334	5.12	1.56254	Up	1.84675e-10	7.82077e-09
CL13456.Contig1_All	2537	90	259	1.6678	4.9258	1.56241	Up	3.0433e-21	2.79469e-19
CL16911.Contig2_All	8171	97	279	0.5581	1.6475	1.56168	Up	9.4656e-23	9.31423e-21
Unigene8482_All	2177	32	92	0.6911	2.039	1.5609	Up	1.93383e-08	6.44431e-07
CL6801.Contig1_All	3218	467	1339	6.8228	20.0766	1.55708	Up	1.99449e-102	9.10938e-100
CL13319.Contig4_All	2323	45	129	0.9107	2.6794	1.55686	Up	2.96486e-11	1.36964e-09
CL205.Contig2_All	1340	22	63	0.7719	2.2685	1.55525	Up	3.72354e-06	8.13046e-05
CL8721.Contig2_All	896	22	63	1.1544	3.3926	1.55525	Up	3.72354e-06	8.13192e-05
CL82.Contig33_All	3464	44	126	0.5972	1.755	1.55518	Up	5.19286e-11	2.33559e-09
Unigene28697_All	3629	121	346	1.5676	4.6003	1.55317	Up	1.24549e-27	1.47213e-25
CL14781.Contig1_All	1744	63	180	1.6983	4.9799	1.55203	Up	4.3945e-15	2.77309e-13
Unigene30472_All	1815	21	60	0.544	1.595	1.55188	Up	6.5985e-06	0.000137176
CL258.Contig9_All	3703	20	57	0.2539	0.7427	1.54852	Up	1.17059e-05	0.000230411
Unigene728_All	1343	20	57	0.7001	2.0478	1.54844	Up	1.17059e-05	0.000230486
Unigene29978_All	2857	20	57	0.3291	0.9626	1.54841	Up	1.17059e-05	0.000230448
CL4500.Contig4_All	2412	26	74	0.5068	1.4803	1.5464	Up	5.78706e-07	1.50338e-05
CL11337.Contig8_All	3110	19	54	0.2872	0.8378	1.54455	Up	2.0791e-05	0.00038278
Unigene5371_All	1116	19	54	0.8004	2.3347	1.54444	Up	2.0791e-05	0.000382722
CL8248.Contig2_All	1747	19	54	0.5113	1.4914	1.54443	Up	2.0791e-05	0.000382606
CL7796.Contig2_All	1351	19	54	0.6612	1.9286	1.5444	Up	2.0791e-05	0.000382664
Unigene17790_All	3064	25	71	0.3836	1.1181	1.54337	Up	1.02193e-06	2.5325e-05
Unigene31301_All	729	25	71	1.6123	4.6992	1.54329	Up	1.02193e-06	2.53198e-05
CL11849.Contig2_All	1547	25	71	0.7598	2.2144	1.54322	Up	1.02193e-06	2.53146e-05
CL8590.Contig1_All	2379	25	71	0.4941	1.44	1.54319	Up	1.02193e-06	2.53094e-05
CL2626.Contig1_All	1878	156	443	3.9054	11.3816	1.54316	Up	1.30125e-34	1.95402e-32
CL13069.Contig3_All	994	56	159	2.6487	7.718	1.54294	Up	2.17584e-13	1.21415e-11
CL6912.Contig1_All	1272	103	292	3.807	11.0762	1.54074	Up	2.6354e-23	2.64486e-21
CL17263.Contig13_All	5849	30	85	0.2411	0.7012	1.54019	Up	9.0745e-08	2.71591e-06
CL4618.Contig2_All	2098	24	68	0.5378	1.5639	1.54001	Up	1.806e-06	4.2419e-05
Unigene27542_All	1263	18	51	0.67	1.9483	1.53998	Up	3.69758e-05	0.000637869
Unigene13993_All	1264	18	51	0.6695	1.9468	1.53995	Up	3.69758e-05	0.000637506
CL3000.Contig1_All	1804	18	51	0.4691	1.364	1.53988	Up	3.69758e-05	0.000637779
CL11954.Contig3_All	3123	60	170	0.9033	2.6265	1.53986	Up	3.5227e-14	2.08287e-12
CL1216.Contig2_All	2301	18	51	0.3678	1.0694	1.53981	Up	3.69758e-05	0.000637688
CL2336.Contig4_All	2372	18	51	0.3568	1.0374	1.53978	Up	3.69758e-05	0.000637597
Unigene15098_All	1689	83	235	2.3104	6.7133	1.53888	Up	5.05132e-19	4.0623e-17
CL3230.Contig2_All	842	99	280	5.5278	16.0451	1.53736	Up	2.41342e-22	2.34433e-20
CL17417.Contig2_All	4271	29	82	0.3192	0.9264	1.53717	Up	1.5982e-07	4.5816e-06
CL3214.Contig8_All	4042	81	229	0.9422	2.7336	1.5367	Up	1.53227e-18	1.19034e-16
CL9715.Contig1_All	569	23	65	1.9004	5.5118	1.53622	Up	3.19426e-06	7.09508e-05
CL12150.Contig2_All	3467	23	65	0.3119	0.9046	1.5362	Up	3.19426e-06	7.09768e-05
CL12724.Contig2_All	2809	23	65	0.385	1.1165	1.53605	Up	3.19426e-06	7.09638e-05
CL6792.Contig2_All	2643	61	172	1.0851	3.14	1.53294	Up	3.0361e-14	1.80132e-12
Unigene30357_All	2736	49	138	0.842	2.4337	1.53126	Up	1.08479e-11	5.25601e-10
Unigene31127_All	802	49	138	2.8725	8.3023	1.5312	Up	1.08479e-11	5.25812e-10
CL4607.Contig1_All	591	54	152	4.2957	12.4094	1.53047	Up	9.99776e-13	5.28641e-11
CL4951.Contig1_All	548	27	76	2.3164	6.6916	1.53047	Up	4.9659e-07	1.30462e-05
Unigene38865_All	1174	43	121	1.722	4.9729	1.53	Up	2.0712e-10	8.72246e-09
CL17155.Contig3_All	1195	91	256	3.5802	10.3364	1.52962	Up	2.02728e-20	1.7832e-18
CL416.Contig5_All	2122	171	481	3.7886	10.9369	1.52947	Up	5.6657e-37	9.05861e-35
CL2541.Contig4_All	1176	165	464	6.5964	19.0374	1.52909	Up	1.03338e-35	1.59328e-33
CL13375.Contig1_All	1151	21	59	0.8578	2.4733	1.52772	Up	1.00203e-05	0.00020056
CL5739.Contig1_All	677	21	59	1.4584	4.2049	1.52769	Up	1.00203e-05	0.000200493
CL2569.Contig4_All	1532	21	59	0.6445	1.8582	1.52765	Up	1.00203e-05	0.000200527
Unigene12245_All	544	26	73	2.247	6.4747	1.52681	Up	8.76174e-07	2.19375e-05
Unigene4183_All	1152	26	73	1.0611	3.0575	1.52679	Up	8.76174e-07	2.1933e-05
CL11598.Contig2_All	1065	36	101	1.5892	4.5758	1.52572	Up	7.00568e-09	2.46847e-07
CL15031.Contig1_All	3296	35	98	0.4992	1.4346	1.52296	Up	1.23004e-08	4.20433e-07
CL11821.Contig2_All	3101	20	56	0.3032	0.8713	1.5229	Up	1.77751e-05	0.00033334
Unigene11812_All	1587	20	56	0.5925	1.7026	1.52285	Up	1.77751e-05	0.000333288
Unigene8831_All	936	40	112	2.0092	5.7735	1.52282	Up	1.11417e-09	4.30422e-08
CL6117.Contig2_All	1408	25	70	0.8348	2.3988	1.52281	Up	1.54698e-06	3.69519e-05
CL2555.Contig8_All	2158	25	70	0.5447	1.5651	1.52272	Up	1.54698e-06	3.69446e-05
CL5534.Contig8_All	2017	34	95	0.7925	2.2726	1.51986	Up	2.16046e-08	7.14445e-07
CL16145.Contig1_All	727	29	81	1.8754	5.3758	1.51928	Up	2.41364e-07	6.72646e-06
CL8912.Contig4_All	2424	29	81	0.5625	1.6123	1.5192	Up	2.41364e-07	6.72801e-06
CL3705.Contig1_All	1610	24	67	0.7008	2.0079	1.51861	Up	2.7334e-06	6.17108e-05
CL4628.Contig1_All	945	24	67	1.194	3.4209	1.51857	Up	2.7334e-06	6.17338e-05
CL11056.Contig1_All	1749	48	134	1.2903	3.6967	1.51853	Up	2.85214e-11	1.32009e-09
Unigene6326_All	885	24	67	1.275	3.6528	1.51851	Up	2.7334e-06	6.17223e-05
Unigene3712_All	1569	19	53	0.5693	1.6299	1.51752	Up	3.15686e-05	0.000552944
Unigene5226_All	475	19	53	1.8806	5.3837	1.5174	Up	3.15686e-05	0.000552864
Unigene30407_All	2174	19	53	0.4109	1.1763	1.5174	Up	3.15686e-05	0.000553024
Unigene14791_All	2041	19	53	0.4377	1.2529	1.51726	Up	3.15686e-05	0.000552784
CL13530.Contig1_All	2374	71	198	1.4061	4.0242	1.517	Up	5.9211e-16	3.9572e-14
CL3984.Contig1_All	1257	71	198	2.6556	7.6002	1.517	Up	5.9211e-16	3.95501e-14
Unigene14675_All	2825	33	92	0.5492	1.5713	1.51656	Up	3.79614e-08	1.20624e-06
CL14361.Contig4_All	1661	28	78	0.7925	2.2658	1.51554	Up	4.2523e-07	1.12915e-05
CL15263.Contig4_All	2391	42	117	0.8259	2.361	1.51536	Up	5.4564e-10	2.18532e-08
CL4663.Contig3_All	5600	23	64	0.1931	0.5514	1.51375	Up	4.83362e-06	0.000103307
CL6238.Contig5_All	2714	32	89	0.5543	1.5823	1.51328	Up	6.67294e-08	2.04003e-06
CL8944.Contig2_All	1930	50	139	1.218	3.475	1.5125	Up	1.40033e-11	6.69377e-10
CL15904.Contig2_All	2036	18	50	0.4156	1.1849	1.5115	Up	5.6139e-05	0.000916094
Unigene936_All	1886	89	247	2.2186	6.319	1.51005	Up	2.0613e-19	1.70997e-17
CL8712.Contig1_All	1270	22	61	0.8144	2.3175	1.50876	Up	8.55508e-06	0.000173704
Unigene28151_All	843	22	61	1.227	3.4914	1.50867	Up	8.55508e-06	0.000173762
CL2981.Contig3_All	2085	22	61	0.4961	1.4116	1.50863	Up	8.55508e-06	0.000173733
CL14739.Contig1_All	2018	130	360	3.0287	8.6075	1.5069	Up	1.66273e-27	1.95005e-25
CL8660.Contig3_All	2049	39	108	0.8949	2.5432	1.50685	Up	2.93504e-09	1.07778e-07
Unigene30012_All	2532	26	72	0.4828	1.372	1.50678	Up	1.32221e-06	3.19871e-05
CL5174.Contig2_All	4551	30	83	0.3099	0.88	1.5057	Up	2.06462e-07	5.80593e-06
CL9992.Contig1_All	991	386	1068	18.3124	51.9988	1.50566	Up	3.39216e-78	1.14682e-75
CL5204.Contig11_All	1208	30	83	1.1676	3.3152	1.50555	Up	2.06462e-07	5.80728e-06
CL17289.Contig4_All	1552	317	877	9.6028	27.2649	1.50552	Up	1.59342e-64	4.59183e-62
CL10539.Contig3_All	1640	34	94	0.9747	2.7655	1.50451	Up	3.24926e-08	1.04648e-06
CL11682.Contig3_All	2693	229	633	3.9979	11.3413	1.50427	Up	5.31024e-47	1.10432e-44
Unigene27522_All	830	21	58	1.1895	3.3717	1.50312	Up	1.51562e-05	0.00028984
Unigene37006_All	1895	42	116	1.042	2.9536	1.50312	Up	8.18848e-10	3.21987e-08
CL946.Contig2_All	1691	294	812	8.174	23.1691	1.50309	Up	9.82852e-60	2.62021e-57
CL16887.Contig4_All	1498	21	58	0.6591	1.8682	1.50308	Up	1.51562e-05	0.000289795
Unigene11322_All	4807	21	58	0.2054	0.5822	1.50308	Up	1.51562e-05	0.000289749
Unigene15262_All	698	25	69	1.6839	4.7697	1.50209	Up	2.33382e-06	5.33464e-05
Unigene43089_All	806	25	69	1.4583	4.1306	1.50206	Up	2.33382e-06	5.33565e-05
CL973.Contig1_All	1136	108	298	4.4697	12.6571	1.5017	Up	6.27432e-23	6.2144e-21
CL2892.Contig2_All	1115	97	267	4.0901	11.554	1.49818	Up	1.22758e-20	1.09008e-18
CL406.Contig1_All	1300	926	2547	33.4888	94.5326	1.49713	Up	2.5126e-182	2.11186e-179
Unigene3442_All	2192	36	99	0.7721	2.1792	1.49694	Up	1.58262e-08	5.33119e-07
CL8230.Contig2_All	2316	20	55	0.406	1.1458	1.4968	Up	2.68788e-05	0.000480039
CL805.Contig2_All	1859	24	66	0.607	1.713	1.49676	Up	4.12236e-06	8.92401e-05
CL3320.Contig3_All	1336	59	162	2.0762	5.8507	1.49466	Up	4.66252e-13	2.53171e-11
CL15997.Contig2_All	3075	133	365	2.0335	5.7272	1.49386	Up	1.57138e-27	1.84649e-25
Unigene20971_All	2069	27	74	0.6135	1.7257	1.49205	Up	1.12787e-06	2.77232e-05
Unigene11702_All	1831	27	74	0.6933	1.95	1.49192	Up	1.12787e-06	2.77176e-05
CL16685.Contig1_All	1958	2565	7029	61.5895	173.212	1.49178	Up	0	0
Unigene1013_All	1379	23	63	0.7841	2.2043	1.49121	Up	7.28724e-06	0.000149847
CL2919.Contig3_All	2355	111	304	2.216	6.2284	1.4909	Up	3.96656e-23	3.94806e-21
Unigene20244_All	727	412	1128	26.6437	74.8636	1.49047	Up	2.78758e-81	9.92321e-79
CL7906.Contig2_All	3680	19	52	0.2427	0.6818	1.49017	Up	4.77232e-05	0.000799458
CL6801.Contig2_All	3358	331	906	4.6342	13.018	1.49012	Up	1.28942e-65	3.76054e-63
CL1806.Contig6_All	1180	19	52	0.757	2.1263	1.48998	Up	4.77232e-05	0.000799236
CL13864.Contig1_All	1394	19	52	0.6408	1.7999	1.48997	Up	4.77232e-05	0.000799126
Unigene17840_All	2273	19	52	0.393	1.1038	1.48988	Up	4.77232e-05	0.000799347
Unigene14724_All	1866	45	123	1.1338	3.1805	1.48809	Up	3.42404e-10	1.40768e-08
Unigene23868_All	1516	56	153	1.7367	4.8695	1.48743	Up	2.47406e-12	1.27206e-10
CL16340.Contig6_All	4277	26	71	0.2858	0.801	1.4868	Up	1.98865e-06	4.62513e-05
CL4858.Contig3_All	1702	486	1327	13.4248	37.619	1.48656	Up	6.25404e-95	2.62828e-92
CL6136.Contig4_All	3635	22	60	0.2845	0.7964	1.48506	Up	1.28928e-05	0.000250554
Unigene27637_All	1085	22	60	0.9533	2.6682	1.48486	Up	1.28928e-05	0.000250514
Unigene11634_All	2056	22	60	0.5031	1.4081	1.48483	Up	1.28928e-05	0.000250594
CL14105.Contig2_All	11391	223	608	0.9204	2.5754	1.48446	Up	2.30786e-44	4.44789e-42
CL6359.Contig1_All	1038	135	368	6.1146	17.1059	1.48416	Up	1.71971e-27	2.01492e-25
CL416.Contig9_All	2103	98	267	2.1909	6.1259	1.4834	Up	2.33486e-20	2.04483e-18
CL11692.Contig1_All	438	75	204	8.0504	22.4725	1.48103	Up	7.1432e-16	4.72697e-14
CL10152.Contig1_All	663	25	68	1.7728	4.9487	1.48102	Up	3.5086e-06	7.71121e-05
CL7778.Contig1_All	3589	50	136	0.655	1.8284	1.48101	Up	4.68562e-11	2.11768e-09
CL4881.Contig9_All	1675	21	57	0.5894	1.6419	1.47805	Up	2.28312e-05	0.000415663
CL15743.Contig1_All	1091	70	190	3.0165	8.4028	1.47799	Up	7.65382e-15	4.74086e-13
CL771.Contig10_All	3611	35	95	0.4557	1.2694	1.47799	Up	4.1563e-08	1.31139e-06
CL5840.Contig2_All	1028	49	133	2.241	6.2424	1.47796	Up	8.18192e-11	3.60103e-09
CL3591.Contig2_All	1469	38	103	1.2162	3.3831	1.47597	Up	1.1528e-08	3.95149e-07
CL17837.Contig6_All	2275	31	84	0.6406	1.7815	1.4756	Up	2.64108e-07	7.31148e-06
CL9494.Contig1_All	1870	24	65	0.6034	1.6771	1.47478	Up	6.1945e-06	0.000129601
CL5336.Contig3_All	2146	41	111	0.8982	2.4957	1.47434	Up	3.20586e-09	1.17473e-07
CL5293.Contig6_All	1322	140	379	4.9788	13.8326	1.4742	Up	5.34174e-28	6.42033e-26
CL10967.Contig2_All	1109	34	92	1.4414	4.0027	1.4735	Up	7.29166e-08	2.21797e-06
CL15997.Contig1_All	3070	115	311	1.7611	4.8879	1.47274	Up	3.17392e-23	3.17216e-21
CL8674.Contig2_All	890	155	419	8.1879	22.7154	1.47211	Up	1.00852e-30	1.35778e-28
CL3706.Contig2_All	4035	47	127	0.5476	1.5186	1.47155	Up	2.49562e-10	1.04228e-08
CL17495.Contig6_All	1977	40	108	0.9512	2.6358	1.47042	Up	5.6104e-09	2.0019e-07
CL15149.Contig1_All	545	20	54	1.7253	4.7807	1.47037	Up	4.04712e-05	0.000691174
Unigene260_All	754	20	54	1.2471	3.4556	1.47036	Up	4.04712e-05	0.000691077
CL15476.Contig6_All	1641	20	54	0.573	1.5877	1.47033	Up	4.04712e-05	0.000690882
CL3365.Contig2_All	626	20	54	1.5021	4.1621	1.47033	Up	4.04712e-05	0.000691272
CL15378.Contig3_All	2521	20	54	0.373	1.0335	1.47029	Up	4.04712e-05	0.000690784
CL7954.Contig1_All	7553	40	108	0.249	0.6899	1.47024	Up	5.6104e-09	2.00131e-07
CL3025.Contig4_All	1877	20	54	0.501	1.3881	1.47023	Up	4.04712e-05	0.000690979
CL10913.Contig3_All	1594	73	197	2.1531	5.9631	1.46965	Up	3.2132e-15	2.03935e-13
CL17765.Contig2_All	3860	76	205	0.9257	2.5625	1.46894	Up	9.07862e-16	5.96856e-14
CL2410.Contig12_All	3634	33	89	0.4269	1.1817	1.46889	Up	1.27962e-07	3.73646e-06
CL8379.Contig3_All	3917	33	89	0.3961	1.0963	1.46871	Up	1.27962e-07	3.73556e-06
CL4189.Contig2_All	2159	669	1804	14.5682	40.3162	1.46854	Up	4.3121e-126	2.47349e-123
CL6754.Contig2_All	4047	56	151	0.6506	1.8003	1.46839	Up	5.49064e-12	2.73027e-10
CL728.Contig4_All	2408	23	62	0.4491	1.2423	1.4679	Up	1.09446e-05	0.000217406
CL15796.Contig1_All	1045	75	202	3.3742	9.3268	1.46684	Up	1.57828e-15	1.02098e-13
Unigene9321_All	981	39	105	1.8691	5.1644	1.46626	Up	9.82034e-09	3.39305e-07
CL16867.Contig1_All	896	26	70	1.3643	3.7695	1.46621	Up	2.98076e-06	6.66366e-05
CL3913.Contig2_All	1588	26	70	0.7698	2.1269	1.4662	Up	2.98076e-06	6.66489e-05
CL11273.Contig2_All	990	29	78	1.3772	3.8015	1.46483	Up	8.16404e-07	2.05473e-05
CL17985.Contig11_All	1848	29	78	0.7378	2.0365	1.46479	Up	8.16404e-07	2.05515e-05
CL17331.Contig2_All	2020	29	78	0.675	1.8631	1.46475	Up	8.16404e-07	2.05558e-05
CL8730.Contig3_All	842	103	277	5.7512	15.8732	1.46466	Up	1.06961e-20	9.51896e-19
CL16781.Contig5_All	1229	146	392	5.5851	15.3897	1.46231	Up	1.4124e-28	1.7355e-26
CL16281.Contig2_All	1059	44	118	1.9534	5.3763	1.46063	Up	1.33061e-09	5.10938e-08
Unigene17860_All	6410	339	909	2.4864	6.8423	1.46042	Up	6.21814e-64	1.78765e-61
CL11314.Contig2_All	819	25	67	1.4351	3.9472	1.45968	Up	5.25594e-06	0.000111467
CL6727.Contig2_All	1788	28	75	0.7362	2.0239	1.45897	Up	1.43632e-06	3.45063e-05
CL9670.Contig4_All	982	28	75	1.3405	3.6851	1.45893	Up	1.43632e-06	3.45131e-05
CL14700.Contig1_All	1258	28	75	1.0464	2.8766	1.45893	Up	1.43632e-06	3.44994e-05
CL4196.Contig2_All	631	56	150	4.1724	11.4699	1.4589	Up	8.15874e-12	4.00599e-10
CL12962.Contig1_All	3487	40	107	0.5393	1.4806	1.45702	Up	8.35604e-09	2.91541e-07
Unigene38665_All	1308	43	115	1.5456	4.2422	1.45665	Up	2.32514e-09	8.63512e-08
CL5695.Contig1_All	967	1339	3581	65.1008	178.679	1.45662	Up	2.40222e-245	2.66741e-242
Unigene21245_All	1777	43	115	1.1377	3.1225	1.45658	Up	2.32514e-09	8.63777e-08
CL8546.Contig3_All	2603	46	123	0.8308	2.28	1.45646	Up	6.48418e-10	2.57649e-08
CL1374.Contig6_All	1725	70	187	1.9078	5.2306	1.45507	Up	2.50608e-14	1.49639e-12
Unigene8318_All	3101	225	601	3.4112	9.3512	1.45487	Up	1.26956e-42	2.34593e-40
Unigene18659_All	1231	109	291	4.1629	11.4059	1.45412	Up	1.89156e-21	1.75703e-19
Unigene864_All	2098	24	64	0.5378	1.4719	1.45254	Up	9.27358e-06	0.000187068
CL13935.Contig1_All	1152	21	56	0.857	2.3455	1.45253	Up	3.42488e-05	0.000595323
Unigene37015_All	624	33	88	2.4863	6.8045	1.45249	Up	1.90804e-07	5.40073e-06
Unigene6377_All	2032	108	288	2.4988	6.8386	1.45247	Up	3.27818e-21	2.999e-19
CL16787.Contig1_All	1070	21	56	0.9227	2.5252	1.45246	Up	3.42488e-05	0.000595238
CL5906.Contig3_All	2515	21	56	0.3926	1.0744	1.4524	Up	3.42488e-05	0.000595152
CL8859.Contig1_All	1922	27	72	0.6605	1.8075	1.45237	Up	2.52816e-06	5.74631e-05
CL10477.Contig15_All	3854	39	104	0.4758	1.302	1.4523	Up	1.46182e-08	4.94905e-07
CL855.Contig1_All	3126	24	64	0.361	0.9878	1.45222	Up	9.27358e-06	0.000187037
CL5828.Contig3_All	3110	77	205	1.164	3.1805	1.45016	Up	1.70217e-15	1.09877e-13
CL5695.Contig3_All	1702	1047	2787	28.9214	79.0084	1.44987	Up	4.3962e-190	3.82795e-187
CL3157.Contig5_All	3152	112	298	1.6706	4.5617	1.44921	Up	7.94546e-22	7.51887e-20
CL1581.Contig1_All	1835	408	1085	10.4534	28.5292	1.44847	Up	4.68156e-75	1.53556e-72
CL1750.Contig2_All	2061	38	101	0.8668	2.3645	1.44776	Up	2.55776e-08	8.36007e-07
Unigene9359_All	985	67	178	3.1979	8.7193	1.44709	Up	1.31655e-13	7.47404e-12
CL17964.Contig2_All	548	32	85	2.7454	7.484	1.44679	Up	3.34742e-07	9.07387e-06
CL7193.Contig5_All	3438	32	85	0.4376	1.1929	1.44679	Up	3.34742e-07	9.0759e-06
CL5205.Contig1_All	1373	215	571	7.3621	20.066	1.44656	Up	3.0123e-40	5.31469e-38
CL17155.Contig5_All	1191	235	624	9.2766	25.2795	1.4463	Up	8.15634e-44	1.55218e-41
CL2561.Contig2_All	2118	29	77	0.6437	1.7541	1.44627	Up	1.21786e-06	2.96939e-05
CL6576.Contig16_All	1920	29	77	0.7101	1.935	1.44624	Up	1.21786e-06	2.96999e-05
CL1264.Contig3_All	2548	63	167	1.1624	3.1624	1.44391	Up	8.13042e-13	4.32549e-11
CL433.Contig7_All	3794	20	53	0.2478	0.674	1.44357	Up	6.06684e-05	0.000982719
Unigene7175_All	3748	160	424	2.007	5.4584	1.44344	Up	3.24324e-30	4.27137e-28
CL9406.Contig1_All	749	40	106	2.5108	6.8284	1.4434	Up	1.24159e-08	4.24021e-07
CL11981.Contig2_All	1163	20	53	0.8085	2.1988	1.4434	Up	6.06684e-05	0.000982588
Unigene20762_All	1649	60	159	1.7107	4.6524	1.44339	Up	2.8915e-12	1.47354e-10
CL2053.Contig2_All	1122	31	82	1.299	3.5263	1.44075	Up	5.87438e-07	1.5241e-05
CL10039.Contig6_All	1208	28	74	1.0897	2.9557	1.43957	Up	2.1411e-06	4.94644e-05
CL17646.Contig2_All	3511	42	111	0.5624	1.5254	1.43952	Up	6.03094e-09	2.14059e-07
CL1347.Contig2_All	1072	25	66	1.0964	2.9706	1.43798	Up	7.84476e-06	0.000160683
CL4858.Contig5_All	1608	168	443	4.912	13.2927	1.43625	Up	2.82792e-31	3.88504e-29
CL351.Contig1_All	683	22	58	1.5144	4.0974	1.43596	Up	2.89298e-05	0.000511685
Unigene9320_All	786	33	87	1.9739	5.3406	1.43595	Up	2.83696e-07	7.79668e-06
Unigene14048_All	3454	22	58	0.2995	0.8102	1.43572	Up	2.89298e-05	0.00051161
Unigene18422_All	809	63	166	3.6612	9.9005	1.43518	Up	1.20206e-12	6.32013e-11
Unigene15534_All	318	30	79	4.4353	11.9866	1.43432	Up	1.03122e-06	2.55238e-05
CL4465.Contig2_All	721	43	113	2.8039	7.562	1.43133	Up	5.11624e-09	1.8364e-07
Unigene49244_All	1176	43	113	1.7191	4.6363	1.43132	Up	5.11624e-09	1.83585e-07
Unigene17889_All	1680	24	63	0.6716	1.8094	1.42984	Up	1.38302e-05	0.000267056
CL3984.Contig2_All	1269	48	126	1.7783	4.7908	1.42977	Up	6.93724e-10	2.7466e-08
CL14462.Contig1_All	1240	56	147	2.1232	5.7199	1.42975	Up	2.64906e-11	1.22891e-09
CL7500.Contig11_All	1351	32	84	1.1136	3	1.42973	Up	4.97344e-07	1.30632e-05
CL12354.Contig1_All	2833	24	63	0.3983	1.073	1.42972	Up	1.38302e-05	0.000267014
CL17047.Contig2_All	1717	45	118	1.2322	3.3159	1.42816	Up	2.48634e-09	9.21118e-08
CL8261.Contig1_All	1992	74	194	1.7465	4.699	1.42789	Up	1.94236e-14	1.16844e-12
CL15793.Contig1_All	1393	37	97	1.2488	3.3598	1.42783	Up	6.63778e-08	2.03082e-06
CL4105.Contig4_All	3155	37	97	0.5514	1.4834	1.42774	Up	6.63778e-08	2.0303e-06
Unigene11632_All	1927	29	76	0.7075	1.903	1.42747	Up	1.81084e-06	4.25163e-05
Unigene21886_All	2299	281	736	5.7464	15.4467	1.42657	Up	2.35244e-50	5.20517e-48
CL2833.Contig10_All	1824	21	55	0.5413	1.4549	1.42642	Up	5.11554e-05	0.000844909
CL2410.Contig2_All	1686	47	123	1.3106	3.52	1.42535	Up	1.20903e-09	4.65433e-08
CL9299.Contig2_All	1168	26	68	1.0466	2.8091	1.4244	Up	6.62628e-06	0.000137682
CL5966.Contig4_All	913	26	68	1.3389	3.5936	1.42438	Up	6.62628e-06	0.000137706
CL7542.Contig8_All	2546	75	196	1.385	3.7144	1.42324	Up	1.64988e-14	9.96952e-13
CL1380.Contig2_All	1791	672	1756	17.6403	47.307	1.42318	Up	3.2104e-117	1.70423e-114
CL5079.Contig2_All	2177	93	243	2.0084	5.3857	1.42309	Up	1.24513e-17	9.21727e-16
Unigene14200_All	2647	36	94	0.6394	1.7134	1.42207	Up	1.16097e-07	3.41059e-06
CL8202.Contig4_All	1262	264	689	9.8351	26.3424	1.42138	Up	5.3201e-47	1.10447e-44
CL14802.Contig2_All	676	130	339	9.0413	24.1963	1.42018	Up	6.33308e-24	6.52906e-22
CL14280.Contig1_All	1377	28	73	0.956	2.5579	1.41988	Up	3.18094e-06	7.07068e-05
CL6067.Contig8_All	1624	155	404	4.4872	12.003	1.41951	Up	3.443e-28	4.15885e-26
CL9036.Contig1_All	677	33	86	2.2917	6.1292	1.41928	Up	4.20586e-07	1.11805e-05
Unigene3970_All	3835	38	99	0.4659	1.2456	1.41875	Up	5.61814e-08	1.73908e-06
Unigene14803_All	1847	48	125	1.2218	3.2654	1.41825	Up	1.02453e-09	3.9706e-08
CL406.Contig7_All	1011	301	783	13.9974	37.3686	1.41667	Up	6.41304e-53	1.50133e-50
CL810.Contig4_All	2755	25	65	0.4266	1.1384	1.41605	Up	1.1665e-05	0.000229867
CL15681.Contig1_All	1119	40	104	1.6806	4.4843	1.41591	Up	2.72126e-08	8.86574e-07
Unigene30774_All	1477	35	91	1.1141	2.9727	1.4159	Up	2.03086e-07	5.71896e-06
Unigene4578_All	4595	25	65	0.2558	0.6825	1.41581	Up	1.1665e-05	0.00022983
Unigene43016_All	2320	157	408	3.1816	8.4853	1.41521	Up	2.48816e-28	3.02967e-26
CL8772.Contig5_All	843	1845	4791	102.897	274.217	1.41412	Up	0	0
CL5055.Contig3_All	1715	42	109	1.1514	3.0666	1.41325	Up	1.31924e-08	4.48641e-07
CL17237.Contig2_All	1949	32	83	0.7719	2.0548	1.41251	Up	7.36706e-07	1.87757e-05
Unigene21144_All	1500	27	70	0.8463	2.2517	1.41177	Up	5.58966e-06	0.000118027
Unigene21105_All	1767	27	70	0.7184	1.9114	1.41177	Up	5.58966e-06	0.000118007
CL1193.Contig3_All	1110	22	57	0.9318	2.4777	1.41091	Up	4.30652e-05	0.000730629
CL3362.Contig5_All	2475	22	57	0.4179	1.1112	1.41089	Up	4.30652e-05	0.000730527
CL564.Contig4_All	1501	22	57	0.6891	1.8323	1.41087	Up	4.30652e-05	0.000730425
CL17927.Contig1_All	1647	22	57	0.628	1.6698	1.41084	Up	4.30652e-05	0.000730732
CL17401.Contig1_All	1572	29	75	0.8673	2.302	1.40828	Up	2.68366e-06	6.07238e-05
CL18043.Contig1_All	1248	29	75	1.0925	2.8996	1.40822	Up	2.68366e-06	6.07465e-05
Unigene24410_All	2088	29	75	0.653	1.7331	1.4082	Up	2.68366e-06	6.07351e-05
CL1814.Contig2_All	3236	24	62	0.3487	0.9244	1.40653	Up	2.0545e-05	0.000378597
CL5022.Contig4_All	1413	321	829	10.6806	28.308	1.40622	Up	2.53794e-55	6.21811e-53
CL2484.Contig4_All	3247	43	111	0.6226	1.6494	1.40556	Up	1.11554e-08	3.83028e-07
CL8665.Contig2_All	2120	38	98	0.8427	2.2304	1.40421	Up	8.2942e-08	2.50155e-06
CL523.Contig11_All	3416	38	98	0.523	1.3842	1.40417	Up	8.2942e-08	2.50093e-06
Unigene14253_All	3934	26	67	0.3107	0.8217	1.40309	Up	9.8259e-06	0.000197354
CL10814.Contig2_All	2631	26	67	0.4646	1.2287	1.40307	Up	9.8259e-06	0.000197289
CL2924.Contig2_All	1954	26	67	0.6256	1.6544	1.403	Up	9.8259e-06	0.000197322
CL1912.Contig3_All	2429	33	85	0.6387	1.6884	1.40245	Up	6.21684e-07	1.60607e-05
CL1048.Contig4_All	3802	40	103	0.4946	1.3071	1.40204	Up	4.0138e-08	1.27007e-06
CL18081.Contig4_All	4580	42	108	0.4311	1.1378	1.40015	Up	1.94423e-08	6.47717e-07
CL9773.Contig1_All	2289	28	72	0.5751	1.5177	1.4	Up	4.70958e-06	0.000100763
Unigene12270_All	848	35	90	1.9405	5.1209	1.39997	Up	2.9986e-07	8.19994e-06
CL5880.Contig1_All	2103	37	95	0.8272	2.1796	1.39776	Up	1.44812e-07	4.18907e-06
CL15266.Contig2_All	2650	30	77	0.5322	1.402	1.39745	Up	2.26164e-06	5.19122e-05
CL7850.Contig2_All	1105	53	136	2.255	5.9384	1.39695	Up	3.01968e-10	1.24865e-08
Unigene8670_All	2571	23	59	0.4206	1.1073	1.39653	Up	3.62038e-05	0.000625711
Unigene31354_All	427	23	59	2.5324	6.6668	1.39649	Up	3.62038e-05	0.00062589
Unigene18143_All	2706	253	649	4.3957	11.5721	1.39649	Up	3.02908e-43	5.68401e-41
Unigene26775_All	1033	23	59	1.0468	2.7558	1.39649	Up	3.62038e-05	0.0006258
CL7542.Contig5_All	1837	46	118	1.1773	3.0993	1.39646	Up	4.57328e-09	1.65229e-07
Unigene11305_All	1901	39	100	0.9645	2.5381	1.3959	Up	7.00134e-08	2.13395e-06
CL1026.Contig2_All	1595	901	2310	26.558	69.8791	1.39571	Up	3.55388e-149	2.4165e-146
Unigene28686_All	426	32	82	3.5316	9.2875	1.39497	Up	1.08792e-06	2.68177e-05
Unigene18145_All	1598	32	82	0.9415	2.4759	1.39492	Up	1.08792e-06	2.68231e-05
CL7354.Contig1_All	1893	82	210	2.0366	5.3526	1.39408	Up	5.19468e-15	3.25597e-13
CL6626.Contig3_All	1500	107	274	3.3537	8.8136	1.39398	Up	3.9476e-19	3.20664e-17
CL11060.Contig2_All	727	25	64	1.6167	4.2476	1.3936	Up	1.72792e-05	0.000325198
CL1856.Contig1_All	1835	25	64	0.6405	1.6828	1.39359	Up	1.72792e-05	0.000325249
CL9741.Contig1_All	2409	27	69	0.5269	1.382	1.39116	Up	8.2671e-06	0.000168478
CL12189.Contig2_All	1633	54	138	1.5547	4.0775	1.39105	Up	2.55192e-10	1.06469e-08
CL9081.Contig2_All	2154	45	115	0.9822	2.576	1.39104	Up	7.95848e-09	2.78232e-07
Unigene4457_All	3146	36	92	0.538	1.411	1.39104	Up	2.52844e-07	7.02052e-06
CL9131.Contig1_All	1812	45	115	1.1676	3.0622	1.39102	Up	7.95848e-09	2.78312e-07
CL17155.Contig6_All	1181	121	309	4.8169	12.6242	1.39002	Up	2.71258e-21	2.49667e-19
Unigene14752_All	1810	56	143	1.4546	3.812	1.38993	Up	1.24215e-10	5.35976e-09
CL1264.Contig6_All	1979	49	125	1.1641	3.0476	1.38846	Up	1.87517e-09	7.05273e-08
CL6431.Contig4_All	2780	138	352	2.3338	6.1093	1.38833	Up	5.34506e-24	5.5293e-22
Unigene9040_All	1396	89	227	2.9973	7.8458	1.38826	Up	5.15976e-16	3.45601e-14
CL17765.Contig1_All	3412	82	209	1.1299	2.9555	1.38721	Up	7.60112e-15	4.71304e-13
CL1185.Contig2_All	1590	135	344	3.9918	10.439	1.38687	Up	1.87406e-23	1.88861e-21
CL8974.Contig1_All	358	42	107	5.5157	14.421	1.38656	Up	2.85838e-08	9.28747e-07
CL2245.Contig2_All	1752	33	84	0.8855	2.3133	1.38539	Up	9.16166e-07	2.28726e-05
CL12331.Contig2_All	1085	35	89	1.5166	3.9578	1.38386	Up	4.4148e-07	1.16948e-05
CL14243.Contig1_All	2703	35	89	0.6088	1.5887	1.38381	Up	4.4148e-07	1.16923e-05
CL1981.Contig3_All	2400	24	61	0.4701	1.2264	1.38339	Up	3.03978e-05	0.000535069
Unigene21689_All	664	24	61	1.6993	4.4326	1.38321	Up	3.03978e-05	0.000534992
CL2981.Contig1_All	1449	24	61	0.7787	2.0312	1.38319	Up	3.03978e-05	0.000534836
CL10954.Contig1_All	1569	24	61	0.7192	1.8759	1.38312	Up	3.03978e-05	0.000534914
CL15584.Contig2_All	2766	85	216	1.4448	3.7679	1.38289	Up	3.1459e-15	1.99873e-13
CL13286.Contig3_All	671	39	99	2.7326	7.1188	1.38136	Up	1.02913e-07	3.05216e-06
CL7863.Contig2_All	3157	26	66	0.3872	1.0087	1.38135	Up	1.45159e-05	0.000278919
CL406.Contig2_All	1271	585	1484	21.6393	56.3358	1.3804	Up	6.05752e-95	2.55456e-92
CL10026.Contig3_All	752	966	2450	60.3937	157.197	1.3801	Up	1.90699e-155	1.34191e-152
CL5430.Contig5_All	1194	209	530	8.2295	21.4174	1.37991	Up	5.19038e-35	7.82325e-33
CL15631.Contig1_All	900	28	71	1.4627	3.8064	1.37979	Up	6.9483e-06	0.00014383
CL9891.Contig2_All	941	30	76	1.4989	3.8969	1.37842	Up	3.33284e-06	7.37178e-05
CL9444.Contig3_All	1702	32	81	0.8839	2.2963	1.37736	Up	1.60156e-06	3.80679e-05
Unigene30063_All	927	266	673	13.4907	35.0293	1.3766	Up	7.50976e-44	1.43364e-41
CL5466.Contig2_All	2369	53	134	1.0518	2.7292	1.37562	Up	6.48708e-10	2.5768e-08
CL5076.Contig3_All	4246	36	91	0.3986	1.0341	1.37536	Up	3.7157e-07	9.99827e-06
Unigene30710_All	1226	36	91	1.3805	3.5814	1.37533	Up	3.7157e-07	9.99383e-06
Unigene31318_All	806	36	91	2.0999	5.4476	1.3753	Up	3.7157e-07	9.99605e-06
CL16440.Contig2_All	1748	57	144	1.5331	3.9748	1.37443	Up	1.53509e-10	6.54215e-09
CL15214.Contig2_All	1803	38	96	0.9909	2.569	1.3744	Up	1.79338e-07	5.09767e-06
Unigene3394_All	1413	40	101	1.3309	3.4489	1.37373	Up	8.66598e-08	2.60524e-06
CL11569.Contig3_All	4158	90	227	1.0176	2.6341	1.37214	Up	9.29602e-16	6.10486e-14
CL3157.Contig2_All	2103	46	116	1.0284	2.6614	1.37178	Up	9.83764e-09	3.39709e-07
Unigene17514_All	6542	71	179	0.5102	1.3202	1.37162	Up	1.00495e-12	5.31142e-11
Unigene12220_All	622	117	295	8.8436	22.8838	1.37162	Up	5.09192e-20	4.37706e-18
CL17325.Contig1_All	2038	242	610	5.5827	14.4418	1.37122	Up	1.1214e-39	1.9473e-37
CL1097.Contig2_All	2272	79	199	1.6347	4.2261	1.3703	Up	5.72514e-14	3.34588e-12
Unigene26774_All	1759	81	204	2.165	5.5958	1.36998	Up	2.79918e-14	1.66565e-12
CL15695.Contig1_All	5709	83	209	0.6835	1.7664	1.3698	Up	1.36897e-14	8.33452e-13
CL67.Contig5_All	1538	29	73	0.8865	2.2901	1.36922	Up	5.83436e-06	0.000122766
CL8153.Contig2_All	2674	29	73	0.5099	1.3172	1.36919	Up	5.83436e-06	0.000122745
CL8667.Contig2_All	4415	31	78	0.3301	0.8524	1.36863	Up	2.79984e-06	6.3011e-05
CL7084.Contig2_All	1976	31	78	0.7376	1.9046	1.36858	Up	2.79984e-06	6.29993e-05
CL7954.Contig2_All	7799	33	83	0.1989	0.5135	1.36832	Up	1.34599e-06	3.24909e-05
CL16020.Contig2_All	2759	33	83	0.5623	1.4515	1.36813	Up	1.34599e-06	3.24844e-05
Unigene1369_All	642	445	1119	32.5879	84.0991	1.36775	Up	4.59224e-71	1.43621e-68
CL6994.Contig2_All	4788	109	274	1.0703	2.7612	1.36728	Up	1.2794e-18	1.00226e-16
Unigene30548_All	2183	37	93	0.7969	2.0555	1.36702	Up	3.12498e-07	8.52436e-06
CL7034.Contig4_All	1749	45	113	1.2096	3.1173	1.36577	Up	1.70894e-08	5.72799e-07
CL11526.Contig5_All	3774	32	80	0.3986	1.0228	1.35951	Up	2.35018e-06	5.36596e-05
Unigene4481_All	4689	34	85	0.3409	0.8747	1.35944	Up	1.13034e-06	2.77616e-05
CL379.Contig2_All	4775	24	60	0.2363	0.6063	1.35941	Up	4.47908e-05	0.00075609
CL12199.Contig1_All	2299	48	120	0.9816	2.5185	1.35936	Up	6.97192e-09	2.458e-07
CL1168.Contig1_All	616	28	70	2.137	5.4829	1.35935	Up	1.02144e-05	0.000204108
Unigene6267_All	834	26	65	1.4657	3.7605	1.35933	Up	2.13624e-05	0.000392048
CL6786.Contig2_All	655	70	175	5.0245	12.8912	1.35933	Up	2.53084e-12	1.2985e-10
CL7415.Contig8_All	1272	26	65	0.961	2.4656	1.35933	Up	2.13624e-05	0.000392107
Unigene8925_All	1803	38	95	0.9909	2.5423	1.35932	Up	2.62636e-07	7.27739e-06
CL10900.Contig3_All	1803	30	75	0.7823	2.0071	1.35932	Up	4.89482e-06	0.000104486
CL17964.Contig1_All	560	34	85	2.8545	7.3236	1.35931	Up	1.13034e-06	2.77559e-05
CL8616.Contig3_All	2884	138	345	2.2497	5.7719	1.35931	Up	7.40698e-23	7.33025e-21
CL13103.Contig3_All	2791	46	115	0.7749	1.9881	1.35931	Up	1.43792e-08	4.87496e-07
CL16842.Contig2_All	2031	24	60	0.5556	1.4254	1.35925	Up	4.47908e-05	0.000756195
CL12775.Contig1_All	2224	24	60	0.5074	1.3017	1.3592	Up	4.47908e-05	0.000755985
CL289.Contig8_All	6153	73	182	0.5578	1.4272	1.35537	Up	1.0411e-12	5.49294e-11
CL12060.Contig4_All	1492	477	1189	15.0308	38.4511	1.3551	Up	2.33938e-74	7.61135e-72
CL9936.Contig3_All	1209	132	329	5.1331	13.13	1.35496	Up	9.07052e-22	8.5501e-20
Unigene11935_All	1601	289	720	8.4867	21.6989	1.35435	Up	1.10143e-45	2.18899e-43
CL3062.Contig1_All	957	33	82	1.6212	4.1343	1.35058	Up	1.97129e-06	4.58917e-05
CL406.Contig5_All	723	64	159	4.1617	10.611	1.35032	Up	3.1751e-11	1.46063e-09
CL5039.Contig1_All	2292	31	77	0.6359	1.621	1.35001	Up	4.1034e-06	8.89251e-05
CL5574.Contig2_All	894	31	77	1.6303	4.1557	1.34995	Up	4.1034e-06	8.8941e-05
Unigene14115_All	3633	31	77	0.4012	1.0226	1.34985	Up	4.1034e-06	8.89092e-05
CL17495.Contig4_All	1964	60	149	1.4363	3.6605	1.34968	Up	1.33834e-10	5.74614e-09
CL11345.Contig3_All	3838	29	72	0.3552	0.9052	1.34961	Up	8.5575e-06	0.000173724
CL15681.Contig2_All	1195	29	72	1.1409	2.9071	1.34941	Up	8.5575e-06	0.000173694
CL8376.Contig1_All	1550	533	1323	16.1669	41.1836	1.34903	Up	5.63022e-82	2.0281e-79
CL3751.Contig4_All	3411	27	67	0.3721	0.9477	1.34874	Up	1.78842e-05	0.000334815
CL7500.Contig7_All	1627	27	67	0.7802	1.9869	1.3486	Up	1.78842e-05	0.000334866
CL4551.Contig1_All	1144	75	186	3.0822	7.8448	1.34778	Up	7.38756e-13	3.94763e-11
Unigene21368_All	2396	524	1299	10.282	26.1588	1.34718	Up	2.34018e-80	8.20983e-78
CL17964.Contig3_All	755	612	1517	38.1098	96.9471	1.34704	Up	1.6218e-93	6.74541e-91
CL13666.Contig1_All	1564	94	233	2.8257	7.1881	1.347	Up	9.95486e-16	6.52337e-14
CL12465.Contig2_All	1410	199	493	6.6354	16.8703	1.34623	Up	1.56743e-31	2.17558e-29
CL3769.Contig1_All	873	42	104	2.2619	5.748	1.34552	Up	8.9491e-08	2.68236e-06
CL14974.Contig3_All	1806	42	104	1.0934	2.7785	1.34548	Up	8.9491e-08	2.68169e-06
CL8772.Contig4_All	838	738	1827	41.4042	105.194	1.3452	Up	5.21192e-112	2.65048e-109
CL4872.Contig2_All	2051	36	89	0.8252	2.0937	1.34324	Up	7.95534e-07	2.00805e-05
CL2383.Contig1_All	1380	34	84	1.1583	2.9369	1.34229	Up	1.65237e-06	3.91449e-05
CL6951.Contig1_All	813	34	84	1.9662	4.9852	1.34224	Up	1.65237e-06	3.91526e-05
CL5695.Contig2_All	965	314	775	15.298	38.7499	1.34085	Up	2.5437e-48	5.42028e-46
CL4858.Contig1_All	1981	216	533	5.1263	12.9819	1.34051	Up	9.55558e-34	1.39007e-31
Unigene11615_All	2392	30	74	0.5896	1.4927	1.34012	Up	7.16408e-06	0.000147841
CL18094.Contig12_All	4027	30	74	0.3502	0.8866	1.3401	Up	7.16408e-06	0.000147791
Unigene18039_All	1368	30	74	1.031	2.61	1.34001	Up	7.16408e-06	0.000147816
CL11.Contig2_All	1244	43	106	1.6251	4.1113	1.33907	Up	7.51076e-08	2.27775e-06
CL6046.Contig3_All	4188	48	118	0.5388	1.3595	1.33525	Up	1.47838e-08	4.9995e-07
CL7415.Contig3_All	1153	72	177	2.9359	7.407	1.33509	Up	3.78334e-12	1.90478e-10
CL2320.Contig1_All	3606	35	86	0.4563	1.1507	1.33446	Up	1.38419e-06	3.33598e-05
CL7315.Contig2_All	2971	46	113	0.7279	1.8352	1.33413	Up	3.05058e-08	9.8564e-07
Unigene18410_All	1037	114	280	5.1684	13.0279	1.33381	Up	2.41412e-18	1.85164e-16
Unigene8322_All	2900	126	309	2.0427	5.1411	1.3316	Up	4.87064e-20	4.1928e-18
CL15548.Contig1_All	666	42	103	2.9649	7.4621	1.3316	Up	1.30254e-07	3.79879e-06
CL10276.Contig1_All	1616	31	76	0.9019	2.2692	1.33114	Up	5.99356e-06	0.000125919
CL4661.Contig3_All	2588	31	76	0.5632	1.4169	1.33102	Up	5.99356e-06	0.000125941
CL17558.Contig1_All	3268	133	326	1.9134	4.8132	1.33086	Up	4.85566e-21	4.40221e-19
CL3811.Contig1_All	601	1474	3612	115.307	289.981	1.33048	Up	7.38122e-216	7.57094e-213
Unigene8317_All	3149	189	463	2.8218	7.0942	1.33002	Up	3.41014e-29	4.30385e-27
Unigene9682_All	1136	98	240	4.0558	10.1936	1.32961	Up	7.24312e-16	4.78786e-14
CL177.Contig13_All	1695	78	191	2.1635	5.437	1.32944	Up	6.37742e-13	3.426e-11
CL7891.Contig2_All	1377	29	71	0.9901	2.4878	1.32922	Up	1.25065e-05	0.000244028
CL7087.Contig3_All	3525	38	93	0.5068	1.273	1.32874	Up	5.58564e-07	1.45418e-05
CL4587.Contig3_All	2339	65	159	1.3065	3.2799	1.32794	Up	5.62034e-11	2.51943e-09
Unigene6009_All	834	61	149	3.4387	8.6202	1.32586	Up	2.36878e-10	9.917e-09
CL15136.Contig2_All	470	34	83	3.4011	8.5207	1.32497	Up	2.40792e-06	5.49261e-05
CL3937.Contig4_All	3705	25	61	0.3172	0.7944	1.32447	Up	5.48326e-05	0.000897681
CL6088.Contig2_All	1510	25	61	0.7784	1.9492	1.3243	Up	5.48326e-05	0.000897559
CL9256.Contig1_All	996	25	61	1.1801	2.9551	1.3243	Up	5.48326e-05	0.000898167
CL235.Contig3_All	2505	25	61	0.4692	1.1749	1.32426	Up	5.48326e-05	0.000898045
CL12671.Contig2_All	1394	25	61	0.8432	2.1114	1.32425	Up	5.48326e-05	0.000897924
CL5576.Contig3_All	1547	25	61	0.7598	1.9025	1.3242	Up	5.48326e-05	0.000897802
CL16478.Contig1_All	860	107	261	5.8495	14.6433	1.32386	Up	5.07402e-17	3.62529e-15
CL14946.Contig2_All	1231	32	78	1.2221	3.0573	1.3229	Up	5.01128e-06	0.000106708
CL16362.Contig1_All	677	32	78	2.2223	5.5591	1.3228	Up	5.01128e-06	0.000106783
CL9210.Contig1_All	3451	32	78	0.436	1.0906	1.32272	Up	5.01128e-06	0.000106746
CL10626.Contig1_All	2227	32	78	0.6756	1.6899	1.3227	Up	5.01128e-06	0.000106727
CL1385.Contig2_All	3573	32	78	0.4211	1.0533	1.32268	Up	5.01128e-06	0.000106765
CL11054.Contig3_All	486	85	207	8.2227	20.5509	1.32152	Up	9.04848e-14	5.19281e-12
Unigene4494_All	419	83	202	9.3131	23.2613	1.3206	Up	1.85033e-13	1.03873e-11
CL13969.Contig1_All	2054	134	326	3.0672	7.658	1.32005	Up	8.5018e-21	7.62221e-19
Unigene17821_All	2779	35	85	0.5921	1.4758	1.31758	Up	2.01364e-06	4.67518e-05
CL13739.Contig1_All	2039	56	136	1.2912	3.2182	1.31754	Up	1.72589e-09	6.52782e-08
CL17179.Contig2_All	6155	140	340	1.0694	2.6653	1.3175	Up	1.45222e-21	1.35937e-19
CL14.Contig4_All	3513	35	85	0.4684	1.1674	1.31749	Up	2.01364e-06	4.67607e-05
CL14739.Contig3_All	3382	143	347	1.9879	4.9505	1.31633	Up	6.00302e-22	5.72097e-20
CL11756.Contig1_All	3850	108	262	1.3188	3.2835	1.31601	Up	6.15132e-17	4.37691e-15
CL17837.Contig13_All	702	40	97	2.6789	6.667	1.3154	Up	3.9139e-07	1.04711e-05
Unigene988_All	1184	33	80	1.3104	3.2601	1.31491	Up	4.1877e-06	9.05898e-05
CL7027.Contig1_All	3829	26	63	0.3192	0.7939	1.3145	Up	4.5719e-05	0.000769719
CL15885.Contig2_All	2018	26	63	0.6057	1.5063	1.31433	Up	4.5719e-05	0.000769505
CL3963.Contig4_All	2495	26	63	0.4899	1.2183	1.31431	Up	4.5719e-05	0.000769398
CL5546.Contig2_All	1799	26	63	0.6795	1.6897	1.31422	Up	4.5719e-05	0.000769612
CL1763.Contig5_All	3347	31	75	0.4354	1.0812	1.31222	Up	8.72422e-06	0.000176752
CL10316.Contig3_All	2094	43	104	0.9654	2.3964	1.31167	Up	1.58263e-07	4.54235e-06
Unigene18214_All	1151	43	104	1.7564	4.3597	1.31161	Up	1.58263e-07	4.54127e-06
Unigene6440_All	992	67	162	3.1754	7.8795	1.31117	Up	5.72276e-11	2.56344e-09
CL4952.Contig1_All	4024	29	70	0.3388	0.8393	1.30875	Up	1.82108e-05	0.000340245
CL956.Contig1_All	758	46	111	2.8531	7.0656	1.30828	Up	6.41032e-08	1.9647e-06
CL15214.Contig4_All	1798	34	82	0.889	2.2005	1.30758	Up	3.49774e-06	7.69293e-05
CL4304.Contig4_All	2054	34	82	0.7782	1.9262	1.30754	Up	3.49774e-06	7.69433e-05
Unigene14119_All	1807	34	82	0.8846	2.1895	1.3075	Up	3.49774e-06	7.69153e-05
CL7567.Contig2_All	10551	51	123	0.2273	0.5625	1.30726	Up	1.26163e-08	4.30138e-07
CL10482.Contig5_All	938	61	147	3.0574	7.5615	1.30637	Up	4.94666e-10	1.99836e-08
CL5720.Contig4_All	3272	44	106	0.6322	1.5631	1.30596	Up	1.3241e-07	3.85425e-06
CL5022.Contig2_All	1386	321	773	10.8886	26.9099	1.30532	Up	2.58934e-46	5.27602e-44
Unigene12464_All	1309	27	65	0.9697	2.3959	1.30496	Up	3.80982e-05	0.00065397
CL1247.Contig10_All	3913	27	65	0.3244	0.8015	1.30493	Up	3.80982e-05	0.000654062
CL1097.Contig1_All	2200	32	77	0.6838	1.6887	1.30427	Up	7.28084e-06	0.000149791
CL12965.Contig1_All	2002	32	77	0.7515	1.8558	1.3042	Up	7.28084e-06	0.00014974
CL7658.Contig2_All	1166	32	77	1.2903	3.1863	1.30418	Up	7.28084e-06	0.000149766
CL11211.Contig3_All	2752	32	77	0.5467	1.35	1.30414	Up	7.28084e-06	0.000149817
CL7080.Contig3_All	1656	42	101	1.1924	2.9428	1.30332	Up	2.73774e-07	7.54284e-06
CL1634.Contig5_All	1588	119	286	3.5231	8.6898	1.30248	Up	4.37346e-18	3.30626e-16
CL4614.Contig6_All	1518	72	173	2.2299	5.4988	1.30214	Up	1.64626e-11	7.83224e-10
CL2708.Contig6_All	2300	35	84	0.7154	1.7622	1.30056	Up	2.92014e-06	6.55477e-05
CL11767.Contig2_All	908	30	72	1.5533	3.826	1.3005	Up	1.51838e-05	0.000290185
CL1065.Contig1_All	1615	45	108	1.31	3.2266	1.30045	Up	1.10739e-07	3.26985e-06
CL11606.Contig3_All	1453	70	168	2.265	5.5788	1.30044	Up	3.37294e-11	1.54752e-09
CL9081.Contig1_All	2074	45	108	1.0201	2.5125	1.30041	Up	1.10739e-07	3.26905e-06
CL406.Contig4_All	1242	1046	2510	39.5952	97.5098	1.30022	Up	2.03736e-145	1.33291e-142
CL16020.Contig1_All	2735	58	139	0.997	2.4522	1.29841	Up	1.749e-09	6.59871e-08
CL10363.Contig4_All	1119	58	139	2.4369	5.9935	1.29835	Up	1.749e-09	6.60077e-08
CL13530.Contig4_All	2860	53	127	0.8712	2.1426	1.29829	Up	8.84036e-09	3.07376e-07
Unigene11425_All	1835	48	115	1.2298	3.0238	1.29794	Up	4.4867e-08	1.4083e-06
CL7360.Contig1_All	1948	43	103	1.0378	2.5512	1.29765	Up	2.28842e-07	6.40403e-06
CL6224.Contig3_All	3056	38	91	0.5846	1.4368	1.29734	Up	1.17436e-06	2.87261e-05
Unigene27428_All	1624	28	67	0.8106	1.9906	1.29614	Up	3.17318e-05	0.000554599
CL8615.Contig2_All	1324	28	67	0.9943	2.4416	1.29607	Up	3.17318e-05	0.000554518
CL8199.Contig3_All	1523	46	110	1.42	3.4849	1.29523	Up	9.25834e-08	2.76273e-06
CL17076.Contig2_All	973	46	110	2.2227	5.4548	1.29521	Up	9.25834e-08	2.76341e-06
Unigene14641_All	2149	46	110	1.0064	2.4697	1.29513	Up	9.25834e-08	2.76205e-06
Unigene12359_All	1552	87	208	2.6355	6.4665	1.29491	Up	1.90339e-13	1.06704e-11
Unigene18576_All	1267	581	1389	21.5591	52.8959	1.29486	Up	8.20512e-81	2.89531e-78
CL3894.Contig8_All	1406	82	196	2.742	6.7262	1.29456	Up	9.48458e-13	5.02824e-11
CL4141.Contig2_All	1844	59	141	1.5043	3.6894	1.29429	Up	1.46413e-09	5.59015e-08
Unigene14637_All	2262	36	86	0.7482	1.8344	1.29381	Up	2.43692e-06	5.55143e-05
CL3992.Contig1_All	1028	36	86	1.6464	4.0365	1.29379	Up	2.43692e-06	5.55248e-05
CL5430.Contig1_All	1358	360	860	12.4633	30.5559	1.29376	Up	1.18848e-50	2.65888e-48
Unigene15320_All	880	121	289	6.4645	15.8457	1.29348	Up	4.42232e-18	3.33903e-16
CL12292.Contig5_All	1538	219	523	6.6945	16.4075	1.29331	Up	1.90663e-31	2.63431e-29
Unigene6342_All	1547	156	372	4.741	11.6024	1.29116	Up	8.96616e-23	8.83714e-21
CL13626.Contig1_All	1474	52	124	1.6586	4.059	1.29116	Up	1.52258e-08	5.13894e-07
CL4096.Contig1_All	1967	1444	3443	34.514	84.4557	1.29101	Up	1.45071e-196	1.33018e-193
CL6315.Contig5_All	2906	47	112	0.7604	1.8596	1.29016	Up	7.73792e-08	2.34194e-06
CL11899.Contig4_All	1796	68	162	1.7801	4.3522	1.28979	Up	9.9412e-11	4.3359e-09
CL14258.Contig4_All	3112	84	200	1.269	3.1009	1.28899	Up	6.6612e-13	3.57686e-11
CL12006.Contig2_All	1746	29	69	0.7809	1.9068	1.28794	Up	2.64174e-05	0.000472565
CL18080.Contig7_All	5188	29	69	0.2628	0.6417	1.28793	Up	2.64174e-05	0.000472496
CL10370.Contig2_All	646	69	164	5.0217	12.2492	1.28644	Up	8.32224e-11	3.66145e-09
CL6359.Contig2_All	1167	77	183	3.1021	7.5662	1.28632	Up	6.79786e-12	3.36509e-10
CL7518.Contig2_All	6087	101	240	0.7801	1.9024	1.28609	Up	3.80604e-15	2.41055e-13
CL11218.Contig2_All	3415	48	114	0.6608	1.6107	1.2854	Up	6.46524e-08	1.98053e-06
Unigene11831_All	1658	64	152	1.8148	4.4234	1.28535	Up	4.17972e-10	1.70102e-08
Unigene16850_All	318	40	95	5.9138	14.4143	1.28534	Up	8.18164e-07	2.05873e-05
CL2802.Contig1_All	1251	43	102	1.616	3.934	1.28357	Up	3.30022e-07	8.95595e-06
Unigene15408_All	1525	165	391	5.0868	12.3709	1.28212	Up	1.29364e-23	1.32018e-21
Unigene18326_All	429	92	218	10.0824	24.5186	1.28204	Up	7.86724e-14	4.53427e-12
Unigene21020_All	2811	76	180	1.2711	3.0896	1.28134	Up	1.16436e-11	5.62132e-10
CL13666.Contig2_All	2364	174	412	3.4605	8.409	1.28095	Up	9.12942e-25	9.72677e-23
CL7193.Contig6_All	4377	49	116	0.5263	1.2787	1.28072	Up	5.40036e-08	1.67681e-06
CL16966.Contig3_All	2104	30	71	0.6704	1.6282	1.28018	Up	2.19842e-05	0.000402057
Unigene31235_All	1194	71	168	2.7957	6.7889	1.27997	Up	5.82866e-11	2.60606e-09
CL9992.Contig2_All	969	265	627	12.8574	31.2205	1.27989	Up	8.5064e-37	1.35468e-34
Unigene24554_All	1164	692	1637	27.9502	67.8566	1.27963	Up	3.27292e-93	1.35198e-90
CL583.Contig2_All	3525	74	175	0.987	2.3954	1.27914	Up	2.38248e-11	1.11249e-09
Unigene20641_All	2847	44	104	0.7266	1.7626	1.27847	Up	2.75426e-07	7.5849e-06
CL11478.Contig1_All	1913	33	78	0.811	1.9673	1.27844	Up	8.77878e-06	0.000177739
CL10125.Contig3_All	3336	33	78	0.4651	1.1281	1.27828	Up	8.77878e-06	0.000177709
CL4407.Contig5_All	2157	47	111	1.0244	2.483	1.27731	Up	1.11353e-07	3.28558e-06
CL6699.Contig1_All	1517	36	85	1.1157	2.7035	1.27688	Up	3.51732e-06	7.72757e-05
Unigene17865_All	2631	72	170	1.2866	3.1176	1.27687	Up	4.87642e-11	2.19981e-09
Unigene8361_All	2132	50	118	1.1026	2.6705	1.2762	Up	4.5097e-08	1.41405e-06
Unigene893_All	1338	28	66	0.9839	2.38	1.27438	Up	4.59432e-05	0.000772312
CL15997.Contig3_All	3168	171	403	2.5377	6.1378	1.2742	Up	4.5021e-24	4.67728e-22
CL2109.Contig23_All	2281	76	179	1.5665	3.7864	1.27328	Up	1.66767e-11	7.92787e-10
CL3155.Contig3_All	5324	124	292	1.095	2.6463	1.27305	Up	7.63388e-18	5.71045e-16
CL12292.Contig1_All	1890	65	153	1.6169	3.9059	1.27242	Up	5.013e-10	2.0191e-08
CL9980.Contig6_All	614	51	120	3.9051	9.4299	1.27188	Up	3.76498e-08	1.19791e-06
CL11461.Contig3_All	1082	34	80	1.4774	3.5675	1.27185	Up	7.30822e-06	0.000150252
CL7434.Contig5_All	2430	37	87	0.7159	1.7275	1.27086	Up	2.92988e-06	6.57542e-05
CL11918.Contig2_All	2100	37	87	0.8284	1.9989	1.27081	Up	2.92988e-06	6.5742e-05
Unigene14750_All	1518	40	94	1.2389	2.9878	1.27002	Up	1.17786e-06	2.88059e-05
CL1935.Contig2_All	1312	46	108	1.6484	3.9718	1.26873	Up	1.91679e-07	5.42297e-06
CL9997.Contig7_All	2094	46	108	1.0328	2.4885	1.26872	Up	1.91679e-07	5.4217e-06
CL15133.Contig5_All	1361	95	223	3.2817	7.9057	1.26845	Up	6.60326e-14	3.83132e-12
CL249.Contig11_All	1350	49	115	1.7065	4.1102	1.26817	Up	7.7548e-08	2.34647e-06
CL518.Contig1_All	1353	32	75	1.1119	2.6746	1.2663	Up	1.52095e-05	0.000290584
CL15161.Contig1_All	2861	32	75	0.5259	1.2649	1.26616	Up	1.52095e-05	0.000290538
CL9013.Contig2_All	2607	35	82	0.6312	1.5176	1.26562	Up	6.0822e-06	0.000127538
CL8667.Contig3_All	4473	138	323	1.4505	3.4842	1.26428	Up	2.2025e-19	1.81963e-17
CL7929.Contig1_All	2260	50	117	1.0401	2.4979	1.26399	Up	6.46922e-08	1.98125e-06
CL504.Contig11_All	964	500	1170	24.3851	58.5605	1.26393	Up	6.7548e-66	1.97955e-63
CL10316.Contig2_All	2072	56	131	1.2707	3.0505	1.26342	Up	1.06455e-08	3.6604e-07
CL14258.Contig3_All	2847	68	159	1.1229	2.6947	1.2629	Up	2.92514e-10	1.21163e-08
CL2938.Contig2_All	3626	68	159	0.8817	2.1158	1.26284	Up	2.92514e-10	1.21122e-08
Unigene21733_All	768	504	1177	30.8533	73.9454	1.26104	Up	4.74966e-66	1.40554e-63
CL11682.Contig6_All	2703	257	600	4.4701	10.7103	1.26062	Up	1.69719e-34	2.53287e-32
Unigene521_All	2876	30	70	0.4904	1.1744	1.25989	Up	3.1711e-05	0.000554395
CL16685.Contig4_All	1930	690	1610	16.8083	40.2499	1.25981	Up	1.53465e-89	6.0111e-87
CL1014.Contig3_All	917	30	70	1.5381	3.6832	1.25981	Up	3.1711e-05	0.000554315
CL11758.Contig1_All	1761	39	91	1.0412	2.4933	1.25981	Up	2.0313e-06	4.71437e-05
CL9916.Contig6_All	1599	33	77	0.9703	2.3235	1.2598	Up	1.26453e-05	0.000246536
Unigene13940_All	1400	33	77	1.1082	2.6537	1.25979	Up	1.26453e-05	0.000246496
CL6514.Contig2_All	1493	33	77	1.0392	2.4884	1.25975	Up	1.26453e-05	0.000246575
CL17460.Contig2_All	2889	36	84	0.5859	1.4029	1.25969	Up	5.06052e-06	0.000107681
CL14817.Contig2_All	1797	1114	2597	29.1453	69.73	1.25852	Up	4.9639e-143	3.23008e-140
CL8772.Contig7_All	819	2773	6460	159.184	380.579	1.2575	Up	0	0
CL6504.Contig1_All	3582	164	382	2.1525	5.1456	1.25733	Up	1.84606e-22	1.79609e-20
Unigene26997_All	562	76	177	6.3578	15.1961	1.2571	Up	3.4047e-11	1.56091e-09
CL9137.Contig1_All	1373	561	1306	19.2099	45.8954	1.2565	Up	1.08965e-72	3.47978e-70
Unigene23860_All	3335	101	235	1.4238	3.3999	1.25575	Up	2.26284e-14	1.35449e-12
CL11744.Contig2_All	4569	43	100	0.4425	1.056	1.25486	Up	6.80816e-07	1.74505e-05
CL12866.Contig1_All	1673	37	86	1.0398	2.4803	1.25421	Up	4.20942e-06	9.10434e-05
CL1992.Contig2_All	1394	108	251	3.6424	8.6877	1.25408	Up	3.19376e-15	2.02807e-13
CL11461.Contig1_All	1348	281	653	9.8005	23.3733	1.25393	Up	4.22308e-37	6.77894e-35
CL6570.Contig1_All	884	34	79	1.8083	4.3119	1.25369	Up	1.05107e-05	0.000209475
CL11534.Contig1_All	3101	34	79	0.5155	1.2292	1.25368	Up	1.05107e-05	0.00020951
CL8772.Contig8_All	526	124	288	11.0833	26.4182	1.25314	Up	3.1469e-17	2.27526e-15
CL751.Contig12_All	3593	62	144	0.8113	1.9338	1.25313	Up	2.51588e-09	9.31206e-08
CL12292.Contig4_All	1812	75	174	1.946	4.6333	1.25153	Up	5.812e-11	2.59957e-09
CL16030.Contig1_All	2812	47	109	0.7858	1.8703	1.25104	Up	2.28874e-07	6.40197e-06
CL2057.Contig8_All	1742	47	109	1.2685	3.0191	1.251	Up	2.28874e-07	6.40345e-06
CL5466.Contig5_All	2414	44	102	0.8569	2.0387	1.25045	Up	5.66872e-07	1.4739e-05
CL1080.Contig5_All	1320	41	95	1.4603	3.4725	1.24971	Up	1.407e-06	3.38556e-05
Unigene14312_All	3087	38	88	0.5787	1.3754	1.24896	Up	3.50072e-06	7.69669e-05
CL1192.Contig3_All	3122	29	67	0.4367	1.0355	1.24561	Up	5.4949e-05	0.000899222
CL10308.Contig1_All	833	306	707	17.2706	40.9516	1.2456	Up	1.24606e-39	2.16066e-37
Unigene5184_All	2091	29	67	0.652	1.546	1.2456	Up	5.4949e-05	0.000898978
Unigene29845_All	4605	29	67	0.2961	0.702	1.24539	Up	5.4949e-05	0.0008991
CL6395.Contig3_All	1650	81	187	2.308	5.4683	1.24445	Up	1.38334e-11	6.61517e-10
CL5130.Contig2_All	2449	39	90	0.7487	1.7732	1.2439	Up	2.91076e-06	6.53493e-05
Unigene23974_All	4653	140	323	1.4146	3.3494	1.24351	Up	6.30062e-19	5.04688e-17
CL5784.Contig5_All	1659	72	166	2.0404	4.8279	1.24254	Up	2.02644e-10	8.54288e-09
CL12256.Contig2_All	655	36	83	2.584	6.1141	1.24253	Up	7.25712e-06	0.000149507
CL7693.Contig1_All	2685	36	83	0.6304	1.4915	1.24242	Up	7.25712e-06	0.000149532
Unigene11880_All	1208	105	242	4.0865	9.6659	1.24204	Up	1.57057e-14	9.49507e-13
CL4127.Contig2_All	1124	69	159	2.8861	6.8254	1.24179	Up	4.96622e-10	2.00559e-08
CL1035.Contig11_All	1411	145	334	4.8314	11.4213	1.24121	Up	1.81654e-19	1.51108e-17
Unigene6287_All	466	274	631	27.6437	65.334	1.24088	Up	2.38018e-35	3.63738e-33
Unigene14660_All	2514	43	99	0.8041	1.9001	1.24063	Up	9.73812e-07	2.42168e-05
CL12711.Contig2_All	1334	43	99	1.5155	3.5808	1.24049	Up	9.73812e-07	2.42218e-05
CL4485.Contig9_All	2777	1039	2392	17.5902	41.5606	1.24044	Up	5.61188e-129	3.36249e-126
Unigene11357_All	4800	50	115	0.4897	1.156	1.23917	Up	1.32171e-07	3.84821e-06
Unigene29675_All	1584	40	92	1.1872	2.8024	1.2391	Up	2.4198e-06	5.51659e-05
CL6028.Contig2_All	1187	50	115	1.9804	4.6746	1.23905	Up	1.32171e-07	3.84913e-06
CL10635.Contig2_All	728	30	69	1.9374	4.5731	1.23905	Up	4.55658e-05	0.000767567
CL9629.Contig2_All	3120	30	69	0.4521	1.0671	1.23898	Up	4.55658e-05	0.00076746
CL16235.Contig1_All	1573	57	131	1.7036	4.0183	1.238	Up	1.80932e-08	6.04772e-07
Unigene3788_All	5656	57	131	0.4738	1.1175	1.23792	Up	1.80932e-08	6.04605e-07
CL15603.Contig2_All	2705	37	85	0.6431	1.5162	1.23735	Up	6.0285e-06	0.000126609
CL5293.Contig7_All	1339	293	673	10.2877	24.2511	1.23713	Up	2.0217e-37	3.28446e-35
CL1558.Contig1_All	6114	54	124	0.4152	0.9786	1.23691	Up	4.45856e-08	1.39983e-06
CL9872.Contig1_All	356	61	140	8.0559	18.9747	1.23596	Up	6.12698e-09	2.1715e-07
Unigene23906_All	4068	61	140	0.705	1.6605	1.23592	Up	6.12698e-09	2.17213e-07
CL7921.Contig3_All	4497	34	78	0.3555	0.8369	1.23521	Up	1.50645e-05	0.00028836
CL8739.Contig1_All	3334	34	78	0.4795	1.1288	1.23519	Up	1.50645e-05	0.000288406
CL3776.Contig2_All	1911	317	727	7.7989	18.3557	1.23489	Up	3.5311e-40	6.21191e-38
CL7567.Contig4_All	7062	58	133	0.3861	0.9087	1.23483	Up	1.50729e-08	5.09159e-07
CL4957.Contig4_All	1975	123	282	2.928	6.8893	1.23444	Up	1.52778e-16	1.05483e-14
Unigene30837_All	1290	113	259	4.1183	9.6874	1.23406	Up	2.62608e-15	1.67462e-13
Unigene12250_All	698	48	110	3.2331	7.6038	1.2338	Up	2.71982e-07	7.50885e-06
CL15310.Contig2_All	1225	31	71	1.1898	2.7965	1.2329	Up	3.77788e-05	0.000648855
CL6941.Contig2_All	2134	31	71	0.683	1.6053	1.23289	Up	3.77788e-05	0.000648947
CL1740.Contig2_All	934	38	87	1.9128	4.4944	1.23244	Up	5.0071e-06	0.000106713
CL706.Contig3_All	1271	52	119	1.9235	4.5175	1.23179	Up	9.15856e-08	2.73768e-06
CL3230.Contig1_All	5615	59	135	0.494	1.1601	1.23167	Up	1.25551e-08	4.28292e-07
CL12705.Contig2_All	2217	59	135	1.2512	2.9381	1.23157	Up	1.25551e-08	4.28413e-07
CL6270.Contig1_All	2966	42	96	0.6657	1.5617	1.23017	Up	1.67154e-06	3.95294e-05
Unigene24041_All	2408	42	96	0.82	1.9236	1.23011	Up	1.67154e-06	3.95139e-05
Unigene63_All	957	42	96	2.0633	4.8401	1.23008	Up	1.67154e-06	3.95062e-05
CL11386.Contig1_All	1161	35	80	1.4173	3.3247	1.23008	Up	1.25012e-05	0.000243964
Unigene23890_All	2167	70	160	1.5187	3.5625	1.23005	Up	5.88586e-10	2.34877e-08
CL14060.Contig3_All	3070	35	80	0.536	1.2573	1.23002	Up	1.25012e-05	0.000244003
CL15328.Contig2_All	3473	42	96	0.5686	1.3337	1.22995	Up	1.67154e-06	3.95216e-05
CL17084.Contig5_All	1076	319	729	13.9383	32.6897	1.22978	Up	4.9331e-40	8.62815e-38
CL8202.Contig1_All	1660	783	1788	22.1761	51.9703	1.22868	Up	1.76739e-95	7.5057e-93
Unigene23827_All	713	318	726	20.9686	49.1296	1.22836	Up	8.32364e-40	1.44955e-37
CL12183.Contig3_All	1574	53	121	1.5831	3.7092	1.22836	Up	7.6223e-08	2.30984e-06
CL7312.Contig1_All	2490	46	105	0.8685	2.0346	1.22815	Up	5.60054e-07	1.45774e-05
CL4186.Contig21_All	2287	32	73	0.6578	1.5401	1.2273	Up	3.13182e-05	0.000549273
Unigene17709_All	2208	57	130	1.2137	2.8408	1.22689	Up	2.57366e-08	8.4075e-07
CL1616.Contig4_All	1658	36	82	1.0208	2.3863	1.22508	Up	1.03728e-05	0.000206999
[truncated: 1,351 more rows]

## Sheet: A1 vs A4
GeneID	Length (bp)	CK-Expression	Salt Stressed Expression	CK Expression normalized	Salt Stressed Expression normalized	log2 Ratio	Up/Down(HT/HCK)	P-value	FDR
CL3053.Contig5_All	583	0	218	0	17.98	14.1341	Up	1.99337e-67	1.79817e-65
CL14398.Contig1_All	254	0	68	0	12.8729	13.652	Up	1.55234e-21	4.56577e-20
CL3053.Contig2_All	1650	0	428	0	12.4728	13.6065	Up	1.12623e-131	1.94318e-129
CL3053.Contig3_All	751	0	187	0	11.973	13.5475	Up	6.07868e-58	4.82599e-56
CL5353.Contig1_All	506	0	102	0	9.6929	13.2427	Up	6.15086e-32	2.71138e-30
CL8477.Contig3_All	309	0	61	0	9.4924	13.2126	Up	2.15072e-19	5.67573e-18
CL1862.Contig4_All	282	0	55	0	9.3781	13.1951	Up	1.47313e-17	3.51982e-16
CL1727.Contig4_All	1086	0	209	0	9.2538	13.1758	Up	1.12998e-64	9.84531e-63
CL16583.Contig1_All	619	0	117	0	9.0886	13.1498	Up	1.58415e-36	8.04567e-35
Unigene12812_All	889	0	144	0	7.7887	12.9272	Up	8.6965e-45	5.43818e-43
CL9137.Contig3_All	253	0	40	0	7.6022	12.8922	Up	5.7198e-13	1.00775e-11
CL1862.Contig1_All	238	0	37	0	7.4753	12.8679	Up	4.73378e-12	7.71653e-11
CL1862.Contig14_All	1197	0	160	0	6.4273	12.65	Up	1.10729e-49	7.59067e-48
CL9831.Contig1_All	619	0	81	0	6.2921	12.6193	Up	1.63581e-25	5.73361e-24
Unigene36863_All	378	0	49	0	6.2331	12.6057	Up	1.00901e-15	2.15229e-14
CL11310.Contig3_All	572	0	70	0	5.8844	12.5227	Up	3.79404e-22	1.14902e-20
CL3889.Contig5_All	439	0	48	0	5.2575	12.3602	Up	2.04098e-15	4.27246e-14
CL5739.Contig2_All	431	0	46	0	5.132	12.3253	Up	8.35074e-15	1.67099e-13
Unigene10249_All	573	0	59	0	4.9511	12.2735	Up	8.79976e-19	2.24487e-17
Unigene16324_All	882	0	85	0	4.634	12.178	Up	9.7715e-27	3.56258e-25
Unigene14531_All	2026	0	188	0	4.4619	12.1234	Up	3.00516e-58	2.39673e-56
CL9078.Contig1_All	1059	0	97	0	4.4043	12.1047	Up	2.0828e-30	8.69326e-29
Unigene7158_All	596	0	53	0	4.2759	12.062	Up	6.02734e-17	1.38581e-15
Unigene43274_All	240	0	21	0	4.2074	12.0387	Up	3.71784e-07	3.54347e-06
CL8820.Contig1_All	465	0	38	0	3.9295	11.9401	Up	2.34028e-12	3.91384e-11
CL1026.Contig4_All	245	0	20	0	3.9252	11.9386	Up	7.52028e-07	6.84537e-06
CL12515.Contig2_All	608	0	49	0	3.8752	11.9201	Up	1.00901e-15	2.15267e-14
CL10979.Contig3_All	369	0	29	0	3.779	11.8838	Up	1.32663e-09	1.70943e-08
CL13993.Contig5_All	255	0	20	0	3.7713	11.8808	Up	7.52028e-07	6.84384e-06
CL15782.Contig1_All	342	0	26	0	3.6555	11.8359	Up	1.09794e-08	1.28156e-07
Unigene43530_All	310	0	23	0	3.5675	11.8007	Up	9.0867e-08	9.43498e-07
CL16770.Contig4_All	367	0	27	0	3.5375	11.7885	Up	5.42794e-09	6.53947e-08
CL600.Contig1_All	346	0	25	0	3.4743	11.7625	Up	2.22086e-08	2.50078e-07
Unigene40534_All	229	0	16	0	3.3596	11.7141	Up	1.25894e-05	9.32253e-05
CL3894.Contig6_All	251	0	17	0	3.2567	11.6692	Up	6.2239e-06	4.88243e-05
CL14544.Contig2_All	235	0	15	0	3.0692	11.5836	Up	2.54652e-05	0.000178137
Unigene19611_All	256	0	16	0	3.0053	11.5533	Up	1.25894e-05	9.32366e-05
Unigene50077_All	322	0	20	0	2.9866	11.5443	Up	7.52028e-07	6.84944e-06
Unigene2835_All	456	0	28	0	2.9525	11.5277	Up	2.68344e-09	3.35299e-08
Unigene39486_All	228	0	14	0	2.9525	11.5277	Up	5.15098e-05	0.000339725
CL2240.Contig14_All	261	0	16	0	2.9477	11.5254	Up	1.25894e-05	9.3169e-05
Unigene13862_All	313	0	17	0	2.6116	11.3507	Up	6.2239e-06	4.87962e-05
Unigene39388_All	262	0	14	0	2.5694	11.3272	Up	5.15098e-05	0.000339123
CL1509.Contig1_All	281	0	15	0	2.5668	11.3258	Up	2.54652e-05	0.000178433
CL1862.Contig8_All	339	0	18	0	2.5531	11.318	Up	3.07694e-06	2.54357e-05
Unigene28432_All	1828	0	95	0	2.4989	11.2871	Up	8.52186e-30	3.4833e-28
CL667.Contig1_All	635	0	33	0	2.4989	11.2871	Up	7.92464e-11	1.15859e-09
Unigene14188_All	619	0	32	0	2.4858	11.2795	Up	1.60296e-10	2.27301e-09
Unigene41497_All	259	0	13	0	2.4135	11.2369	Up	0.000104192	0.000642392
Unigene39131_All	538	0	27	0	2.4131	11.2367	Up	5.42794e-09	6.53819e-08
Unigene40866_All	303	0	15	0	2.3804	11.217	Up	2.54652e-05	0.000178269
CL16583.Contig2_All	588	0	29	0	2.3715	11.2116	Up	1.32663e-09	1.70961e-08
CL6027.Contig3_All	285	0	14	0	2.362	11.2058	Up	5.15098e-05	0.000339268
CL436.Contig1_All	347	0	17	0	2.3557	11.2019	Up	6.2239e-06	4.88525e-05
Unigene13723_All	412	0	20	0	2.3342	11.1887	Up	7.52028e-07	6.84232e-06
Unigene39006_All	337	0	16	0	2.2829	11.1567	Up	1.25894e-05	9.32986e-05
Unigene25518_All	316	0	15	0	2.2825	11.1564	Up	2.54652e-05	0.000178086
CL1306.Contig2_All	296	0	14	0	2.2743	11.1512	Up	5.15098e-05	0.000339817
Unigene25898_All	276	0	13	0	2.2648	11.1452	Up	0.000104192	0.000642683
Unigene39648_All	446	0	21	0	2.2641	11.1447	Up	3.71784e-07	3.5432e-06
Unigene39796_All	278	0	13	0	2.2485	11.1347	Up	0.000104192	0.000641842
Unigene39413_All	364	0	17	0	2.2457	11.1329	Up	6.2239e-06	4.88274e-05
CL11779.Contig1_All	301	0	14	0	2.2365	11.127	Up	5.15098e-05	0.000339853
CL658.Contig2_All	2947	0	137	0	2.2353	11.1263	Up	1.20488e-42	7.13388e-41
CL13712.Contig1_All	367	0	17	0	2.2273	11.1211	Up	6.2239e-06	4.87806e-05
CL4286.Contig2_All	519	0	24	0	2.2235	11.1186	Up	4.49224e-08	4.86009e-07
Unigene7094_All	671	0	31	0	2.2215	11.1173	Up	3.24238e-10	4.4614e-09
Unigene13512_All	368	0	17	0	2.2213	11.1172	Up	6.2239e-06	4.87868e-05
Unigene3327_All	632	0	29	0	2.2064	11.1075	Up	1.32663e-09	1.71032e-08
CL4104.Contig2_All	1352	0	62	0	2.205	11.1066	Up	1.06327e-19	2.85266e-18
CL13712.Contig2_All	284	0	13	0	2.201	11.1039	Up	0.000104192	0.000642133
Unigene19923_All	285	0	13	0	2.1933	11.0989	Up	0.000104192	0.000643136
Unigene36303_All	329	0	15	0	2.1923	11.0982	Up	2.54652e-05	0.000178259
Unigene1947_All	768	0	35	0	2.1913	11.0976	Up	1.93684e-11	2.99353e-10
Unigene40070_All	309	0	14	0	2.1786	11.0892	Up	5.15098e-05	0.000339141
Unigene39090_All	354	0	16	0	2.1733	11.0857	Up	1.25894e-05	9.32422e-05
Unigene10213_All	487	0	22	0	2.1722	11.0849	Up	1.83801e-07	1.83132e-06
Unigene42386_All	289	0	13	0	2.163	11.0788	Up	0.000104192	0.000642327
Unigene39052_All	490	0	22	0	2.1589	11.0761	Up	1.83801e-07	1.83042e-06
CL13679.Contig3_All	379	0	17	0	2.1568	11.0747	Up	6.2239e-06	4.88431e-05
Unigene40326_All	448	0	20	0	2.1466	11.0678	Up	7.52028e-07	6.84893e-06
CL16416.Contig1_All	538	0	24	0	2.145	11.0668	Up	4.49224e-08	4.86095e-07
Unigene39108_All	293	0	13	0	2.1334	11.0589	Up	0.000104192	0.000642521
CL11502.Contig6_All	410	0	18	0	2.111	11.0437	Up	3.07694e-06	2.54391e-05
CL3053.Contig4_All	416	0	18	0	2.0806	11.0228	Up	3.07694e-06	2.54614e-05
Unigene25710_All	509	0	22	0	2.0783	11.0212	Up	1.83801e-07	1.83057e-06
Unigene28758_All	326	0	14	0	2.065	11.0119	Up	5.15098e-05	0.000339414
Unigene41106_All	494	0	21	0	2.0441	10.9973	Up	3.71784e-07	3.54375e-06
CL13073.Contig2_All	690	0	29	0	2.0209	10.9808	Up	1.32663e-09	1.71014e-08
Unigene42309_All	311	0	13	0	2.01	10.973	Up	0.000104192	0.000642942
Unigene40048_All	313	0	13	0	1.9971	10.9637	Up	0.000104192	0.000642101
Unigene29024_All	877	0	36	0	1.9738	10.9468	Up	9.57528e-12	1.51922e-10
Unigene13665_All	465	0	19	0	1.9647	10.9401	Up	1.52117e-06	1.31693e-05
Unigene2310_All	514	0	21	0	1.9645	10.9399	Up	3.71784e-07	3.54182e-06
Unigene14533_All	1861	0	76	0	1.9637	10.9394	Up	5.53918e-24	1.81094e-22
Unigene16640_All	417	0	17	0	1.9603	10.9369	Up	6.2239e-06	4.88368e-05
CL9078.Contig2_All	1012	0	41	0	1.9481	10.9279	Up	2.82774e-13	5.08669e-12
Unigene42118_All	642	0	26	0	1.9473	10.9273	Up	1.09794e-08	1.28095e-07
Unigene26422_All	519	0	21	0	1.9456	10.926	Up	3.71784e-07	3.5421e-06
Unigene28906_All	699	0	28	0	1.9261	10.9115	Up	2.68344e-09	3.3523e-08
Unigene41339_All	377	0	15	0	1.9132	10.9018	Up	2.54652e-05	0.000178331
CL1541.Contig6_All	352	0	14	0	1.9124	10.9012	Up	5.15098e-05	0.000339104
Unigene15514_All	428	0	17	0	1.9099	10.8993	Up	6.2239e-06	4.88305e-05
CL7000.Contig1_All	1362	0	54	0	1.9064	10.8966	Up	2.97978e-17	6.98086e-16
Unigene32065_All	558	0	22	0	1.8958	10.8886	Up	1.83801e-07	1.83102e-06
Unigene26838_All	2395	0	94	0	1.8872	10.882	Up	1.72376e-29	6.95993e-28
CL8443.Contig2_All	2903	0	112	0	1.8551	10.8573	Up	5.36426e-35	2.60457e-33
Unigene16064_All	519	0	20	0	1.853	10.8556	Up	7.52028e-07	6.83978e-06
Unigene2305_All	572	0	22	0	1.8494	10.8528	Up	1.83801e-07	1.83117e-06
Unigene32302_All	364	0	14	0	1.8494	10.8528	Up	5.15098e-05	0.000339743
CL11572.Contig1_All	443	0	17	0	1.8452	10.8496	Up	6.2239e-06	4.88212e-05
CL12260.Contig3_All	473	0	18	0	1.8298	10.8375	Up	3.07694e-06	2.54546e-05
Unigene31829_All	791	0	30	0	1.8237	10.8327	Up	6.55854e-10	8.73868e-09
CL4582.Contig2_All	688	0	26	0	1.8171	10.8274	Up	1.09794e-08	1.28119e-07
Unigene35213_All	345	0	13	0	1.8119	10.8233	Up	0.000104192	0.000641778
Unigene2065_All	425	0	16	0	1.8102	10.8219	Up	1.25894e-05	9.32028e-05
Unigene13188_All	400	0	15	0	1.8032	10.8163	Up	2.54652e-05	0.000178178
Unigene23069_All	401	0	15	0	1.7987	10.8127	Up	2.54652e-05	0.000178219
Unigene16835_All	535	0	20	0	1.7975	10.8118	Up	7.52028e-07	6.84995e-06
Unigene25352_All	620	0	23	0	1.7838	10.8007	Up	9.0867e-08	9.43018e-07
Unigene42759_All	462	0	17	0	1.7693	10.789	Up	6.2239e-06	4.87899e-05
Unigene40808_All	436	0	16	0	1.7646	10.7851	Up	1.25894e-05	9.33043e-05
Unigene42573_All	383	0	14	0	1.7576	10.7794	Up	5.15098e-05	0.000339871
Unigene25359_All	411	0	15	0	1.7549	10.7772	Up	2.54652e-05	0.000178422
CL1260.Contig7_All	1021	0	37	0	1.7425	10.7669	Up	4.73378e-12	7.71756e-11
Unigene22755_All	552	0	20	0	1.7422	10.7667	Up	7.52028e-07	6.8413e-06
CL4540.Contig6_All	803	0	29	0	1.7365	10.762	Up	1.32663e-09	1.7105e-08
CL15730.Contig2_All	501	0	18	0	1.7276	10.7546	Up	3.07694e-06	2.54408e-05
Unigene16131_All	474	0	17	0	1.7245	10.752	Up	6.2239e-06	4.8793e-05
Unigene3811_All	785	0	28	0	1.7151	10.7441	Up	2.68344e-09	3.35196e-08
CL9831.Contig2_All	648	0	23	0	1.7067	10.737	Up	9.0867e-08	9.43178e-07
Unigene10742_All	593	0	21	0	1.7028	10.7337	Up	3.71784e-07	3.54155e-06
Unigene39450_All	538	0	19	0	1.6981	10.7297	Up	1.52117e-06	1.31721e-05
Unigene26193_All	397	0	14	0	1.6957	10.7277	Up	5.15098e-05	0.000339524
Unigene39832_All	569	0	20	0	1.6901	10.7229	Up	7.52028e-07	6.84791e-06
CL5154.Contig3_All	456	0	16	0	1.6872	10.7204	Up	1.25894e-05	9.32761e-05
Unigene13105_All	828	0	29	0	1.6841	10.7178	Up	1.32663e-09	1.70979e-08
Unigene16394_All	373	0	13	0	1.6759	10.7107	Up	0.000104192	0.000642036
Unigene42079_All	517	0	18	0	1.6741	10.7092	Up	3.07694e-06	2.5434e-05
CL4266.Contig8_All	431	0	15	0	1.6735	10.7087	Up	2.54652e-05	0.00017831
Unigene10927_All	403	0	14	0	1.6704	10.706	Up	5.15098e-05	0.000339597
Unigene18794_All	724	0	25	0	1.6604	10.6973	Up	2.22086e-08	2.50055e-07
CL13721.Contig2_All	669	0	23	0	1.6531	10.691	Up	9.0867e-08	9.43418e-07
Unigene39197_All	729	0	25	0	1.649	10.6874	Up	2.22086e-08	2.50101e-07
Unigene19988_All	965	0	33	0	1.6443	10.6833	Up	7.92464e-11	1.15818e-09
CL18048.Contig2_All	586	0	20	0	1.6411	10.6804	Up	7.52028e-07	6.84333e-06
Unigene13382_All	382	0	13	0	1.6364	10.6763	Up	0.000104192	0.000642586
CL12768.Contig2_All	413	0	14	0	1.63	10.6707	Up	5.15098e-05	0.00033978
Unigene40287_All	384	0	13	0	1.6279	10.6688	Up	0.000104192	0.00064223
Unigene32054_All	651	0	22	0	1.625	10.6662	Up	1.83801e-07	1.83027e-06
Unigene39228_All	477	0	16	0	1.6129	10.6554	Up	1.25894e-05	9.32704e-05
Unigene38487_All	630	0	21	0	1.6028	10.6464	Up	3.71784e-07	3.54237e-06
CL16982.Contig2_All	692	0	23	0	1.5982	10.6422	Up	9.0867e-08	9.43338e-07
Unigene42167_All	487	0	16	0	1.5798	10.6255	Up	1.25894e-05	9.31915e-05
Unigene32666_All	396	0	13	0	1.5785	10.6243	Up	0.000104192	0.00064181
CL861.Contig2_All	610	0	20	0	1.5765	10.6225	Up	7.52028e-07	6.83927e-06
Unigene4994_All	397	0	13	0	1.5745	10.6207	Up	0.000104192	0.000642165
Unigene2668_All	398	0	13	0	1.5706	10.6171	Up	0.000104192	0.000643007
CL4795.Contig2_All	736	0	24	0	1.568	10.6147	Up	4.49224e-08	4.85881e-07
Unigene2704_All	583	0	19	0	1.5671	10.6139	Up	1.52117e-06	1.3174e-05
CL436.Contig2_All	617	0	20	0	1.5586	10.606	Up	7.52028e-07	6.84435e-06
Unigene40721_All	402	0	13	0	1.555	10.6027	Up	0.000104192	0.000641875
Unigene23250_All	621	0	20	0	1.5486	10.5967	Up	7.52028e-07	6.84486e-06
CL17610.Contig1_All	435	0	14	0	1.5475	10.5957	Up	5.15098e-05	0.000339232
CL5026.Contig2_All	407	0	13	0	1.5359	10.5849	Up	0.000104192	0.000642812
Unigene12929_All	627	0	20	0	1.5338	10.5829	Up	7.52028e-07	6.84028e-06
Unigene25751_All	408	0	13	0	1.5321	10.5813	Up	0.000104192	0.000641617
Unigene5383_All	1103	0	35	0	1.5258	10.5754	Up	1.93684e-11	2.99391e-10
Unigene16070_All	475	0	15	0	1.5184	10.5683	Up	2.54652e-05	0.000178371
Unigene16014_All	412	0	13	0	1.5172	10.5672	Up	0.000104192	0.000643298
Unigene28989_All	477	0	15	0	1.5121	10.5623	Up	2.54652e-05	0.000178249
Unigene38552_All	609	0	19	0	1.5002	10.5509	Up	1.52117e-06	1.31768e-05
Unigene19425_All	707	0	22	0	1.4963	10.5472	Up	1.83801e-07	1.83072e-06
CL12523.Contig2_All	418	0	13	0	1.4954	10.5463	Up	0.000104192	0.000641939
Unigene39921_All	452	0	14	0	1.4893	10.5404	Up	5.15098e-05	0.000339926
Unigene10865_All	454	0	14	0	1.4828	10.5341	Up	5.15098e-05	0.000339177
CL1300.Contig1_All	553	0	17	0	1.4782	10.5296	Up	6.2239e-06	4.88149e-05
CL16563.Contig2_All	1632	0	50	0	1.4732	10.5247	Up	4.98832e-16	1.08117e-14
CL14824.Contig1_All	555	0	17	0	1.4728	10.5243	Up	6.2239e-06	4.88493e-05
Unigene42537_All	1143	0	35	0	1.4724	10.524	Up	1.93684e-11	2.99428e-10
CL13343.Contig3_All	491	0	15	0	1.469	10.5206	Up	2.54652e-05	0.000178168
Unigene23140_All	459	0	14	0	1.4666	10.5183	Up	5.15098e-05	0.000339652
Unigene41107_All	493	0	15	0	1.463	10.5147	Up	2.54652e-05	0.00017832
CL9423.Contig3_All	661	0	20	0	1.4549	10.5067	Up	7.52028e-07	6.83825e-06
Unigene39199_All	496	0	15	0	1.4542	10.506	Up	2.54652e-05	0.000178056
Unigene25555_All	463	0	14	0	1.4539	10.5057	Up	5.15098e-05	0.00033936
Unigene32675_All	794	0	24	0	1.4534	10.5052	Up	4.49224e-08	4.85966e-07
Unigene26329_All	662	0	20	0	1.4527	10.5045	Up	7.52028e-07	6.84181e-06
Unigene27309_All	563	0	17	0	1.4519	10.5037	Up	6.2239e-06	4.88587e-05
Unigene42626_All	431	0	13	0	1.4503	10.5021	Up	0.000104192	0.000643071
Unigene26247_All	431	0	13	0	1.4503	10.5021	Up	0.000104192	0.000642424
Unigene7890_All	434	0	13	0	1.4403	10.4922	Up	0.000104192	0.000642747
Unigene39081_All	434	0	13	0	1.4403	10.4922	Up	0.000104192	0.000642004
CL13108.Contig2_All	471	0	14	0	1.4293	10.4811	Up	5.15098e-05	0.000339945
Unigene1856_All	606	0	18	0	1.4282	10.48	Up	3.07694e-06	2.54511e-05
CL15730.Contig1_All	506	0	15	0	1.4254	10.4772	Up	2.54652e-05	0.000178402
Unigene16106_All	439	0	13	0	1.4239	10.4756	Up	0.000104192	0.000643331
Unigene10136_All	542	0	16	0	1.4195	10.4712	Up	1.25894e-05	9.31803e-05
Unigene25585_All	578	0	17	0	1.4142	10.4658	Up	6.2239e-06	4.87993e-05
Unigene16558_All	512	0	15	0	1.4087	10.4601	Up	2.54652e-05	0.000178188
Unigene13270_All	582	0	17	0	1.4045	10.4558	Up	6.2239e-06	4.87837e-05
CL124.Contig1_All	446	0	13	0	1.4016	10.4529	Up	0.000104192	0.000642068
Unigene16791_All	516	0	15	0	1.3978	10.4489	Up	2.54652e-05	0.000178158
Unigene7265_All	448	0	13	0	1.3953	10.4464	Up	0.000104192	0.000643266
CL5377.Contig9_All	903	0	26	0	1.3845	10.4351	Up	1.09794e-08	1.28144e-07
Unigene10638_All	558	0	16	0	1.3788	10.4292	Up	1.25894e-05	9.32535e-05
Unigene18756_All	872	0	25	0	1.3786	10.429	Up	2.22086e-08	2.50147e-07
Unigene4928_All	593	0	17	0	1.3785	10.4289	Up	6.2239e-06	4.88118e-05
Unigene2016_All	704	0	20	0	1.366	10.4157	Up	7.52028e-07	6.84842e-06
Unigene40558_All	493	0	14	0	1.3655	10.4152	Up	5.15098e-05	0.00033989
Unigene28392_All	636	0	18	0	1.3609	10.4103	Up	3.07694e-06	2.54322e-05
CL12682.Contig2_All	502	0	14	0	1.341	10.3891	Up	5.15098e-05	0.00033925
Unigene28547_All	467	0	13	0	1.3385	10.3864	Up	0.000104192	0.000643104
CL14421.Contig1_All	612	0	17	0	1.3357	10.3834	Up	6.2239e-06	4.8818e-05
CL10.Contig3_All	2520	0	70	0	1.3357	10.3834	Up	3.79404e-22	1.14873e-20
CL12411.Contig1_All	831	0	23	0	1.3309	10.3782	Up	9.0867e-08	9.42859e-07
Unigene2900_All	471	0	13	0	1.3272	10.3742	Up	0.000104192	0.000642877
Unigene31956_All	471	0	13	0	1.3272	10.3742	Up	0.000104192	0.000641681
CL2210.Contig4_All	726	0	20	0	1.3246	10.3713	Up	7.52028e-07	6.83876e-06
Unigene22202_All	799	0	22	0	1.324	10.3707	Up	1.83801e-07	1.83087e-06
CL7701.Contig2_All	509	0	14	0	1.3226	10.3692	Up	5.15098e-05	0.000339086
CL17772.Contig2_All	694	0	19	0	1.3164	10.3624	Up	1.52117e-06	1.31758e-05
CL10089.Contig7_All	987	0	27	0	1.3154	10.3613	Up	5.42794e-09	6.53754e-08
Unigene36371_All	549	0	15	0	1.3138	10.3595	Up	2.54652e-05	0.000178392
CL8866.Contig2_All	550	0	15	0	1.3114	10.3569	Up	2.54652e-05	0.000178351
Unigene25803_All	518	0	14	0	1.2996	10.3439	Up	5.15098e-05	0.000339615
Unigene5471_All	705	0	19	0	1.2959	10.3397	Up	1.52117e-06	1.3173e-05
Unigene39226_All	483	0	13	0	1.2942	10.3378	Up	0.000104192	0.000642456
Unigene32705_All	559	0	15	0	1.2903	10.3335	Up	2.54652e-05	0.0001783
Unigene19265_All	709	0	19	0	1.2886	10.3316	Up	1.52117e-06	1.31675e-05
Unigene7755_All	672	0	18	0	1.288	10.3309	Up	3.07694e-06	2.54374e-05
Unigene41815_All	524	0	14	0	1.2847	10.3272	Up	5.15098e-05	0.000339451
Unigene28247_All	939	0	25	0	1.2802	10.3222	Up	2.22086e-08	2.50124e-07
Unigene10088_All	757	0	20	0	1.2704	10.3111	Up	7.52028e-07	6.84689e-06
Unigene2225_All	886	0	23	0	1.2482	10.2856	Up	9.0867e-08	9.42939e-07
Unigene13795_All	656	0	17	0	1.2461	10.2832	Up	6.2239e-06	4.88337e-05
CL16922.Contig1_All	542	0	14	0	1.242	10.2784	Up	5.15098e-05	0.000339688
Unigene16708_All	581	0	15	0	1.2414	10.2778	Up	2.54652e-05	0.000178096
Unigene31130_All	1009	0	26	0	1.239	10.275	Up	1.09794e-08	1.28107e-07
Unigene12174_All	1283	0	33	0	1.2368	10.2724	Up	7.92464e-11	1.15832e-09
CL899.Contig1_All	662	0	17	0	1.2348	10.2701	Up	6.2239e-06	4.88462e-05
CL16528.Contig2_All	585	0	15	0	1.2329	10.2678	Up	2.54652e-05	0.000178382
Unigene19198_All	508	0	13	0	1.2305	10.265	Up	0.000104192	0.000642198
CL8128.Contig4_All	630	0	16	0	1.2212	10.2541	Up	1.25894e-05	9.31746e-05
Unigene15992_All	829	0	21	0	1.2181	10.2504	Up	3.71784e-07	3.54265e-06
Unigene42110_All	558	0	14	0	1.2064	10.2365	Up	5.15098e-05	0.000339579
Unigene19561_All	598	0	15	0	1.2061	10.2361	Up	2.54652e-05	0.000178127
CL12330.Contig2_All	642	0	16	0	1.1984	10.2269	Up	1.25894e-05	9.32648e-05
Unigene27390_All	1126	0	28	0	1.1957	10.2236	Up	2.68344e-09	3.35264e-08
Unigene6963_All	727	0	18	0	1.1905	10.2174	Up	3.07694e-06	2.5446e-05
Unigene28837_All	769	0	19	0	1.188	10.2143	Up	1.52117e-06	1.31703e-05
Unigene16505_All	567	0	14	0	1.1873	10.2135	Up	5.15098e-05	0.000339542
Unigene18937_All	692	0	17	0	1.1813	10.2062	Up	6.2239e-06	4.88087e-05
CL362.Contig1_All	734	0	18	0	1.1792	10.2036	Up	3.07694e-06	2.5458e-05
Unigene41704_All	532	0	13	0	1.175	10.1984	Up	0.000104192	0.000643201
CL12281.Contig1_All	1403	0	34	0	1.1653	10.1865	Up	3.91776e-11	5.89816e-10
Unigene22850_All	625	0	15	0	1.154	10.1724	Up	2.54652e-05	0.000178361
Unigene1679_All	626	0	15	0	1.1522	10.1702	Up	2.54652e-05	0.000178107
Unigene23115_All	630	0	15	0	1.1449	10.161	Up	2.54652e-05	0.000178147
CL658.Contig1_All	1393	0	33	0	1.1391	10.1537	Up	7.92464e-11	1.15845e-09
Unigene2707_All	593	0	14	0	1.1352	10.1487	Up	5.15098e-05	0.000339159
Unigene35215_All	1060	0	25	0	1.1341	10.1473	Up	2.22086e-08	2.50032e-07
CL17475.Contig3_All	640	0	15	0	1.127	10.1383	Up	2.54652e-05	0.000178412
Unigene15583_All	1157	0	27	0	1.1221	10.132	Up	5.42794e-09	6.53883e-08
CL9459.Contig2_All	731	0	17	0	1.1182	10.127	Up	6.2239e-06	4.88024e-05
Unigene22563_All	827	0	19	0	1.1047	10.1094	Up	1.52117e-06	1.31684e-05
Unigene7023_All	785	0	18	0	1.1026	10.1067	Up	3.07694e-06	2.54477e-05
Unigene23917_All	655	0	15	0	1.1012	10.1049	Up	2.54652e-05	0.000178239
CL17092.Contig1_All	570	0	13	0	1.0967	10.099	Up	0.000104192	0.000642295
Unigene19918_All	573	0	13	0	1.0909	10.0913	Up	0.000104192	0.000641907
Unigene21609_All	710	0	16	0	1.0836	10.0816	Up	1.25894e-05	9.32141e-05
CL11293.Contig3_All	578	0	13	0	1.0815	10.0788	Up	0.000104192	0.000643169
Unigene7142_All	625	0	14	0	1.0771	10.0729	Up	5.15098e-05	0.000339835
CL14837.Contig1_All	804	0	18	0	1.0765	10.0721	Up	3.07694e-06	2.54425e-05
Unigene25580_All	947	0	21	0	1.0663	10.0584	Up	3.71784e-07	3.541e-06
CL7000.Contig3_All	1415	0	31	0	1.0534	10.0408	Up	3.24238e-10	4.46089e-09
CL10723.Contig2_All	687	0	15	0	1.0499	10.036	Up	2.54652e-05	0.000178198
CL17984.Contig2_All	642	0	14	0	1.0486	10.0342	Up	5.15098e-05	0.000339487
Unigene1028_All	645	0	14	0	1.0437	10.0275	Up	5.15098e-05	0.000339798
Unigene14126_All	1300	0	28	0	1.0357	10.0164	Up	2.68344e-09	3.35128e-08
CL658.Contig4_All	1916	0	41	0	1.0289	10.0069	Up	2.82774e-13	5.08595e-12
CL9926.Contig1_All	707	0	15	0	1.0202	9.99464	Up	2.54652e-05	0.00017829
CL5575.Contig2_All	762	0	16	0	1.0096	9.97957	Up	1.25894e-05	9.33099e-05
Unigene5780_All	763	0	16	0	1.0083	9.97771	Up	1.25894e-05	9.32197e-05
Unigene13851_All	670	0	14	0	1.0047	9.97255	Up	5.15098e-05	0.000339707
Unigene24669_All	670	0	14	0	1.0047	9.97255	Up	5.15098e-05	0.000339378
Unigene22802_All	870	0	18	0	0.9948	9.95826	Up	3.07694e-06	2.54529e-05
Unigene29900_All	1023	0	21	0	0.9871	9.94705	Up	3.71784e-07	3.54127e-06
Unigene25301_All	683	0	14	0	0.9856	9.94486	Up	5.15098e-05	0.000339341
CL10281.Contig3_All	781	0	16	0	0.9851	9.94413	Up	1.25894e-05	9.31972e-05
CL7734.Contig6_All	1231	0	25	0	0.9765	9.93148	Up	2.22086e-08	2.50009e-07
CL1396.Contig1_All	840	0	17	0	0.9731	9.92644	Up	6.2239e-06	4.8865e-05
CL6869.Contig2_All	997	0	20	0	0.9646	9.91379	Up	7.52028e-07	6.85046e-06
CL3877.Contig1_All	802	0	16	0	0.9593	9.90584	Up	1.25894e-05	9.3231e-05
Unigene25558_All	753	0	15	0	0.9579	9.90373	Up	2.54652e-05	0.000178341
CL8355.Contig1_All	1658	0	33	0	0.957	9.90238	Up	7.92464e-11	1.15804e-09
Unigene2023_All	666	0	13	0	0.9386	9.87437	Up	0.000104192	0.000642909
Unigene26353_All	783	0	15	0	0.9212	9.84737	Up	2.54652e-05	0.000178229
Unigene719_All	2331	0	44	0	0.9076	9.82591	Up	3.41672e-14	6.56145e-13
CL3993.Contig12_All	743	0	14	0	0.906	9.82337	Up	5.15098e-05	0.000339323
Unigene50386_All	692	0	13	0	0.9033	9.81906	Up	0.000104192	0.000641713
Unigene12974_All	748	0	14	0	0.9	9.81378	Up	5.15098e-05	0.000339762
Unigene28877_All	861	0	16	0	0.8936	9.80349	Up	1.25894e-05	9.32479e-05
CL8700.Contig1_All	1077	0	20	0	0.8929	9.80235	Up	7.52028e-07	6.84079e-06
Unigene6857_All	862	0	16	0	0.8925	9.80171	Up	1.25894e-05	9.33156e-05
CL3323.Contig1_All	813	0	15	0	0.8872	9.79312	Up	2.54652e-05	0.00017828
Unigene7889_All	710	0	13	0	0.8804	9.78202	Up	0.000104192	0.000643363
Unigene22171_All	710	0	13	0	0.8804	9.78202	Up	0.000104192	0.000642262
Unigene6957_All	772	0	14	0	0.872	9.76818	Up	5.15098e-05	0.000339305
Unigene4584_All	720	0	13	0	0.8682	9.76188	Up	0.000104192	0.000643233
CL9780.Contig1_All	997	0	18	0	0.8681	9.76172	Up	3.07694e-06	2.54563e-05
Unigene28954_All	1612	0	29	0	0.865	9.75656	Up	1.32663e-09	1.70996e-08
CL267.Contig5_All	951	0	17	0	0.8595	9.74735	Up	6.2239e-06	4.88618e-05
CL8105.Contig1_All	980	0	17	0	0.8341	9.70408	Up	6.2239e-06	4.88399e-05
Unigene6723_All	787	0	13	0	0.7943	9.63354	Up	0.000104192	0.000642553
CL263.Contig4_All	793	0	13	0	0.7883	9.6226	Up	0.000104192	0.000641649
CL15906.Contig1_All	1221	0	20	0	0.7876	9.62132	Up	7.52028e-07	6.8474e-06
CL15673.Contig1_All	1227	0	20	0	0.7838	9.61434	Up	7.52028e-07	6.84282e-06
CL1153.Contig2_All	860	0	14	0	0.7828	9.6125	Up	5.15098e-05	0.000339908
CL1954.Contig1_All	799	0	13	0	0.7823	9.61158	Up	0.000104192	0.00064278
Unigene10379_All	864	0	14	0	0.7791	9.60566	Up	5.15098e-05	0.000339396
Unigene15929_All	1379	0	22	0	0.7671	9.58327	Up	1.83801e-07	1.83147e-06
CL7651.Contig1_All	1533	0	24	0	0.7528	9.55612	Up	4.49224e-08	4.85924e-07
Unigene11903_All	2125	0	33	0	0.7467	9.54438	Up	7.92464e-11	1.1579e-09
Unigene5977_All	1035	0	16	0	0.7433	9.5378	Up	1.25894e-05	9.32874e-05
Unigene41467_All	843	0	13	0	0.7415	9.5343	Up	0.000104192	0.000642618
CL550.Contig2_All	1042	0	16	0	0.7383	9.52806	Up	1.25894e-05	9.32592e-05
Unigene14835_All	1180	0	18	0	0.7335	9.51865	Up	3.07694e-06	2.54632e-05
CL620.Contig3_All	994	0	15	0	0.7256	9.50303	Up	2.54652e-05	0.000178066
CL4001.Contig7_All	932	0	14	0	0.7223	9.49645	Up	5.15098e-05	0.000339433
CL7734.Contig7_All	1304	0	19	0	0.7006	9.45245	Up	1.52117e-06	1.31712e-05
CL4881.Contig2_All	1073	0	15	0	0.6722	9.39275	Up	2.54652e-05	0.000178117
CL4041.Contig1_All	942	0	13	0	0.6636	9.37417	Up	0.000104192	0.00064265
CL12835.Contig1_All	1757	0	24	0	0.6568	9.35931	Up	4.49224e-08	4.86052e-07
CL7269.Contig2_All	1327	0	18	0	0.6522	9.34917	Up	3.07694e-06	2.54443e-05
CL5850.Contig10_All	2901	0	39	0	0.6464	9.33628	Up	1.15697e-12	1.98476e-11
CL1157.Contig2_All	1006	0	13	0	0.6214	9.27938	Up	0.000104192	0.000641972
CL17890.Contig3_All	1017	0	13	0	0.6146	9.2635	Up	0.000104192	0.000642489
CL1289.Contig15_All	1487	0	19	0	0.6144	9.26303	Up	1.52117e-06	1.31749e-05
CL10.Contig2_All	2105	0	26	0	0.5939	9.21408	Up	1.09794e-08	1.28131e-07
Unigene35107_All	1163	0	14	0	0.5788	9.17692	Up	5.15098e-05	0.000339561
CL17836.Contig1_All	1186	0	14	0	0.5676	9.14873	Up	5.15098e-05	0.000339506
Unigene11451_All	1538	0	18	0	0.5628	9.13648	Up	3.07694e-06	2.54597e-05
CL10.Contig5_All	2439	0	28	0	0.552	9.10852	Up	2.68344e-09	3.35162e-08
CL2214.Contig4_All	2032	0	23	0	0.5443	9.08826	Up	9.0867e-08	9.43098e-07
CL14986.Contig2_All	1151	0	13	0	0.5431	9.08507	Up	0.000104192	0.000642974
CL2551.Contig4_All	1277	0	13	0	0.4895	8.93517	Up	0.000104192	0.000643428
CL15376.Contig1_All	3274	0	33	0	0.4847	8.92095	Up	7.92464e-11	1.15873e-09
Unigene26581_All	2070	0	20	0	0.4646	8.85985	Up	7.52028e-07	6.84587e-06
CL11028.Contig2_All	1374	0	13	0	0.4549	8.82941	Up	0.000104192	0.000643395
Unigene26899_All	1418	0	13	0	0.4408	8.78398	Up	0.000104192	0.000642845
CL501.Contig6_All	2189	0	20	0	0.4393	8.77906	Up	7.52028e-07	6.84638e-06
Unigene26612_All	1545	0	14	0	0.4357	8.76719	Up	5.15098e-05	0.000339634
CL13387.Contig2_All	2571	0	23	0	0.4302	8.74886	Up	9.0867e-08	9.43258e-07
CL4649.Contig1_All	1545	0	13	0	0.4046	8.66035	Up	0.000104192	0.000642359
CL14431.Contig2_All	2049	0	16	0	0.3755	8.55267	Up	1.25894e-05	9.32817e-05
CL14431.Contig1_All	1818	0	14	0	0.3703	8.53255	Up	5.15098e-05	0.00033967
CL1192.Contig6_All	1688	0	13	0	0.3703	8.53255	Up	0.000104192	0.000641746
Unigene17044_All	1831	0	13	0	0.3414	8.41532	Up	0.000104192	0.000643039
CL14431.Contig3_All	2079	0	14	0	0.3238	8.33896	Up	5.15098e-05	0.000339214
CL14431.Contig23_All	2276	0	15	0	0.3169	8.30788	Up	2.54652e-05	0.000178208
Unigene37626_All	782	1	304	0.0601	18.6926	8.28089	Up	1.51166e-91	1.8155e-89
CL14431.Contig29_All	2173	0	14	0	0.3098	8.27519	Up	5.15098e-05	0.000339195
Unigene15873_All	663	1	270	0.0709	19.5818	8.10951	Up	3.39254e-81	3.65517e-79
CL4918.Contig12_All	2462	0	14	0	0.2734	8.09487	Up	5.15098e-05	0.000339287
Unigene41853_All	982	1	265	0.0479	12.9759	8.08159	Up	1.12774e-79	1.19611e-77
CL5293.Contig2_All	2520	0	14	0	0.2671	8.06124	Up	5.15098e-05	0.000339469
CL12565.Contig5_All	3078	0	17	0	0.2656	8.05311	Up	6.2239e-06	4.88556e-05
CL5850.Contig7_All	2978	0	16	0	0.2583	8.0129	Up	1.25894e-05	9.32084e-05
CL5850.Contig11_All	3551	0	18	0	0.2437	7.92896	Up	3.07694e-06	2.54494e-05
Unigene26582_All	4274	0	21	0	0.2363	7.88448	Up	3.71784e-07	3.54292e-06
CL5850.Contig4_All	3055	0	15	0	0.2361	7.88325	Up	2.54652e-05	0.000178076
Unigene26630_All	3516	0	17	0	0.2325	7.86109	Up	6.2239e-06	4.88055e-05
CL5850.Contig9_All	3677	0	16	0	0.2092	7.70874	Up	1.25894e-05	9.31859e-05
CL5850.Contig6_All	3865	0	16	0	0.1991	7.63735	Up	1.25894e-05	9.3293e-05
CL1862.Contig9_All	995	2	382	0.0945	18.4605	7.60991	Up	2.53292e-113	3.76106e-111
CL3223.Contig2_All	3674	0	13	0	0.1701	7.41024	Up	0.000104192	0.000642715
CL10979.Contig4_All	231	3	498	0.6106	103.662	7.40744	Up	1.1777e-146	2.27916e-144
CL8477.Contig2_All	1881	3	468	0.075	11.9635	7.31753	Up	1.4758e-137	2.65086e-135
CL8477.Contig1_All	1982	4	604	0.0949	14.6533	7.2706	Up	5.99528e-177	1.41783e-174
CL13407.Contig2_All	768	4	601	0.2449	37.6284	7.26349	Up	4.86466e-176	1.14163e-173
CL3734.Contig2_All	746	6	896	0.3781	57.7526	7.25497	Up	9.24354e-262	3.17185e-259
CL13407.Contig3_All	711	5	732	0.3306	49.5044	7.22633	Up	6.64202e-214	1.87479e-211
CL2182.Contig6_All	1962	1	132	0.024	3.235	7.07459	Up	2.7845e-39	1.51133e-37
CL1862.Contig5_All	1363	3	381	0.1035	13.441	7.02087	Up	3.31578e-111	4.84713e-109
CL1260.Contig5_All	1178	1	124	0.0399	5.0615	6.98703	Up	7.34096e-37	3.75797e-35
CL8393.Contig1_All	2140	1	115	0.022	2.584	6.87596	Up	3.86642e-34	1.83157e-32
CL2784.Contig2_All	1172	1	114	0.0401	4.6771	6.86587	Up	7.75452e-34	3.64242e-32
CL1862.Contig12_All	1690	1	107	0.0278	3.0444	6.77493	Up	1.01008e-31	4.4239e-30
CL2182.Contig8_All	1880	1	99	0.025	2.5321	6.66226	Up	2.6248e-29	1.05148e-27
CL1862.Contig15_All	1232	1	98	0.0382	3.8249	6.64571	Up	5.25726e-29	2.08355e-27
CL1610.Contig2_All	1122	1	91	0.0419	3.8999	6.54034	Up	6.77888e-27	2.48482e-25
Unigene31395_All	764	5	431	0.3077	27.126	6.46201	Up	5.90354e-123	9.56608e-121
Unigene20657_All	1319	3	254	0.1069	9.2596	6.43662	Up	7.14104e-73	6.95936e-71
CL10979.Contig1_All	803	298	25045	17.4475	1499.71	6.42552	Up	0	0
CL3221.Contig3_All	2014	3	250	0.07	5.9687	6.41392	Up	1.14071e-71	1.09086e-69
CL4367.Contig1_All	781	1	83	0.0602	5.1101	6.40744	Up	1.73804e-24	5.83006e-23
Unigene4464_All	1364	1	77	0.0345	2.7144	6.29789	Up	1.10739e-22	3.41964e-21
CL14130.Contig2_All	752	10	757	0.6252	48.4039	6.27466	Up	5.11318e-213	1.43335e-210
CL2414.Contig10_All	3438	1	74	0.0137	1.035	6.23931	Up	8.82112e-22	2.62538e-20
CL8738.Contig1_All	1339	2	147	0.0702	5.2788	6.2326	Up	3.04172e-42	1.78885e-40
Unigene21165_All	874	2	144	0.1076	7.9223	6.20217	Up	2.418e-41	1.3887e-39
CL7021.Contig2_All	839	2	139	0.1121	7.9663	6.15105	Up	7.6421e-40	4.2208e-38
CL4367.Contig2_All	815	3	206	0.1731	12.1538	6.13366	Up	1.86551e-58	1.49365e-56
CL4540.Contig1_All	275	1	68	0.171	11.8899	6.1196	Up	5.57104e-20	1.51692e-18
Unigene6549_All	1755	3	201	0.0804	5.5071	6.09795	Up	5.87644e-57	4.59397e-55
CL11310.Contig2_All	1149	68	4389	2.7824	183.674	6.04467	Up	0	0
CL2414.Contig7_All	1962	1	63	0.024	1.544	6.00749	Up	1.75358e-18	4.39928e-17
Unigene30875_All	1616	27	1670	0.7855	49.691	5.98323	Up	0	0
CL14904.Contig6_All	763	1	61	0.0616	3.8442	5.96361	Up	6.95732e-18	1.69339e-16
CL4367.Contig3_All	781	2	122	0.1204	7.5112	5.96314	Up	9.41646e-35	4.54148e-33
CL1727.Contig2_All	889	1	61	0.0529	3.2994	5.96279	Up	6.95732e-18	1.69373e-16
CL14398.Contig3_All	823	250	14706	14.2814	859.206	5.91079	Up	0	0
Unigene7342_All	276	1	58	0.1703	10.1047	5.8908	Up	5.48798e-17	1.26489e-15
CL11412.Contig1_All	1645	5	289	0.1429	8.4476	5.88546	Up	2.28698e-80	2.43829e-78
CL6976.Contig2_All	1421	5	285	0.1654	9.6439	5.86559	Up	3.57508e-79	3.77873e-77
Unigene9130_All	2396	4	225	0.0785	4.5154	5.84602	Up	1.08674e-62	9.25143e-61
CL2656.Contig5_All	1204	2	108	0.0781	4.3132	5.78729	Up	1.42673e-30	5.98141e-29
CL10.Contig4_All	2881	1	53	0.0163	0.8846	5.76208	Up	1.70596e-15	3.58955e-14
CL1862.Contig7_All	356	1	53	0.1321	7.1586	5.75998	Up	1.70596e-15	3.58832e-14
Unigene1760_All	1014	1	53	0.0464	2.5133	5.75931	Up	1.70596e-15	3.58894e-14
CL3221.Contig2_All	1913	10	528	0.2458	13.2715	5.7547	Up	1.67249e-144	3.18636e-142
Unigene42940_All	848	3	158	0.1663	8.9591	5.75149	Up	4.14882e-44	2.5514e-42
CL3053.Contig1_All	1519	9	474	0.2786	15.0046	5.75107	Up	7.80106e-130	1.33098e-127
Unigene26884_All	2769	5	262	0.0849	4.5497	5.74386	Up	2.57354e-72	2.49615e-70
CL14398.Contig2_All	1412	87	4551	2.8968	154.98	5.74147	Up	0	0
Unigene26842_All	2181	5	252	0.1078	5.5558	5.68757	Up	2.4382e-69	2.27309e-67
Unigene579_All	2028	3	150	0.0695	3.5565	5.6773	Up	9.9881e-42	5.80713e-40
CL16088.Contig3_All	1579	1	50	0.0298	1.5226	5.67508	Up	1.33621e-14	2.6308e-13
CL11310.Contig5_All	1115	64	3188	2.6986	137.482	5.67089	Up	0	0
CL2414.Contig9_All	2909	2	99	0.0323	1.6364	5.66285	Up	6.83468e-28	2.60424e-26
Unigene27560_All	2126	1	49	0.0221	1.1082	5.64803	Up	2.6518e-14	5.13192e-13
Unigene27876_All	1730	1	49	0.0272	1.3619	5.64587	Up	2.6518e-14	5.13274e-13
Unigene18454_All	990	118	5707	5.6038	277.188	5.62832	Up	0	0
Unigene8598_All	2758	1	48	0.017	0.8369	5.62145	Up	5.26076e-14	9.94374e-13
Unigene3716_All	1501	1	48	0.0313	1.5377	5.61847	Up	5.26076e-14	9.94527e-13
CL8853.Contig1_All	672	1	48	0.07	3.4346	5.61664	Up	5.26076e-14	9.94681e-13
CL1490.Contig4_All	1068	9	429	0.3962	19.3147	5.60733	Up	1.88645e-116	2.86716e-114
CL11310.Contig1_All	742	3	143	0.1901	9.2669	5.60726	Up	1.20357e-39	6.58506e-38
Unigene11667_All	1582	1	46	0.0297	1.3982	5.55696	Up	2.068e-13	3.74478e-12
CL132.Contig3_All	2000	2	92	0.047	2.2119	5.55648	Up	8.22002e-26	2.90863e-24
CL9634.Contig1_All	699	2	92	0.1345	6.3287	5.55623	Up	8.22002e-26	2.90947e-24
CL13407.Contig4_All	1017	1	45	0.0462	2.1276	5.52519	Up	4.09766e-13	7.29504e-12
CL13935.Contig2_All	565	1	45	0.0832	3.8297	5.5245	Up	4.09766e-13	7.29716e-12
CL2414.Contig11_All	3702	3	135	0.0381	1.7535	5.5243	Up	2.8517e-37	1.474e-35
CL11677.Contig1_All	1384	1	45	0.034	1.5634	5.52301	Up	4.09766e-13	7.2961e-12
Unigene45134_All	289	19	852	3.0909	141.757	5.51925	Up	2.58912e-228	7.79293e-226
CL16208.Contig4_All	1169	2	89	0.0804	3.6608	5.50882	Up	6.38228e-25	2.18209e-23
CL1862.Contig2_All	1196	2	89	0.0786	3.5782	5.50856	Up	6.38228e-25	2.1827e-23
Unigene22078_All	570	4	177	0.3299	14.9314	5.50018	Up	2.05946e-48	1.37787e-46
Unigene5752_All	831	8	353	0.4526	20.4257	5.49601	Up	2.9371e-95	3.67519e-93
Unigene24731_All	987	1	44	0.0476	2.1436	5.49293	Up	8.11578e-13	1.41262e-11
CL3889.Contig4_All	1212	6	263	0.2327	10.4341	5.48669	Up	2.96058e-71	2.80927e-69
CL8185.Contig11_All	1634	20	872	0.5755	25.6606	5.4786	Up	6.8751e-233	2.11081e-230
CL658.Contig3_All	3028	1	43	0.0155	0.6828	5.46112	Up	1.60668e-12	2.7204e-11
Unigene27509_All	1540	1	43	0.0305	1.3426	5.46008	Up	1.60668e-12	2.72115e-11
CL12843.Contig1_All	621	1	43	0.0757	3.3295	5.45887	Up	1.60668e-12	2.72078e-11
CL1260.Contig1_All	1096	2	86	0.0858	3.773	5.45859	Up	4.945e-24	1.62015e-22
CL13761.Contig2_All	900	1	42	0.0522	2.2439	5.42581	Up	3.17922e-12	5.25446e-11
Unigene8638_All	992	2	83	0.0948	4.0232	5.40731	Up	3.82278e-23	1.20354e-21
CL2414.Contig5_All	832	2	82	0.113	4.7391	5.39022	Up	7.55476e-23	2.34892e-21
CL4540.Contig4_All	3491	39	1590	0.5252	21.9003	5.38194	Up	0	0
CL8185.Contig10_All	1974	26	1052	0.6192	25.6254	5.37103	Up	3.75496e-278	1.38135e-275
CL11861.Contig3_All	895	1	40	0.0525	2.149	5.3552	Up	1.24295e-11	1.9531e-10
CL2784.Contig1_All	1326	1	40	0.0355	1.4505	5.35259	Up	1.24295e-11	1.95335e-10
CL1862.Contig11_All	1123	4	158	0.1675	6.7652	5.3359	Up	8.6015e-43	5.12251e-41
CL10263.Contig3_All	510	1	39	0.0922	3.677	5.31762	Up	2.45568e-11	3.76361e-10
Unigene21830_All	1532	3	117	0.0921	3.6722	5.3173	Up	6.04488e-32	2.66562e-30
CL501.Contig7_All	2502	1	39	0.0188	0.7495	5.31712	Up	2.45568e-11	3.76456e-10
Unigene15388_All	1107	1	39	0.0425	1.694	5.31683	Up	2.45568e-11	3.76409e-10
CL1814.Contig10_All	2233	1	39	0.0211	0.8398	5.31473	Up	2.45568e-11	3.76314e-10
CL7724.Contig7_All	1910	10	383	0.2461	9.642	5.29202	Up	1.63554e-101	2.18969e-99
CL2414.Contig4_All	4897	13	495	0.1248	4.8605	5.28341	Up	1.0975e-130	1.88564e-128
CL8912.Contig1_All	410	6	227	0.688	26.6222	5.27408	Up	1.28882e-60	1.06319e-58
CL13679.Contig1_All	637	5	189	0.369	14.2667	5.27289	Up	1.12411e-50	7.85994e-49
Unigene38863_All	1068	1	37	0.044	1.6658	5.24257	Up	9.56874e-11	1.38754e-09
CL6190.Contig4_All	1119	11	407	0.4622	17.4891	5.24179	Up	2.60484e-107	3.67625e-105
Unigene21517_All	1426	1	37	0.033	1.2476	5.24055	Up	9.56874e-11	1.38737e-09
Unigene24777_All	798	3	109	0.1767	6.5679	5.21606	Up	1.37979e-29	5.58582e-28
CL16464.Contig2_All	1198	1	36	0.0392	1.4449	5.20397	Up	1.88711e-10	2.66268e-09
Unigene28799_All	2172	17	612	0.368	13.5486	5.20229	Up	4.76748e-160	1.00521e-157
CL4613.Contig2_All	824	1	36	0.0571	2.1008	5.2013	Up	1.88711e-10	2.66299e-09
CL6069.Contig2_All	1945	13	461	0.3142	11.3968	5.1808	Up	1.1172e-120	1.7682e-118
CL17488.Contig5_All	884	215	7567	11.4345	411.599	5.16977	Up	0	0
Unigene22091_All	1381	1	35	0.034	1.2186	5.16355	Up	3.71922e-10	5.07985e-09
CL5176.Contig8_All	689	1	35	0.0682	2.4426	5.1625	Up	3.71922e-10	5.08098e-09
CL8657.Contig3_All	973	1	35	0.0483	1.7296	5.16227	Up	3.71922e-10	5.08155e-09
CL7338.Contig3_All	1692	1	35	0.0278	0.9946	5.16096	Up	3.71922e-10	5.08042e-09
Unigene11558_All	675	1	35	0.0697	2.4933	5.16075	Up	3.71922e-10	5.08212e-09
Unigene29718_All	1899	1	35	0.0248	0.8862	5.15922	Up	3.71922e-10	5.07929e-09
CL7724.Contig6_All	2285	11	384	0.2263	8.0807	5.15817	Up	1.51385e-100	2.00921e-98
CL14130.Contig1_All	703	6	207	0.4013	14.1585	5.14084	Up	9.87806e-55	7.46964e-53
CL3527.Contig2_All	1357	6	207	0.2079	7.3349	5.14082	Up	9.87806e-55	7.46503e-53
CL1260.Contig4_All	1030	8	274	0.3652	12.7913	5.13033	Up	5.96042e-72	5.72677e-70
CL13295.Contig2_All	1308	525	17867	18.8705	656.82	5.12129	Up	0	0
Unigene22237_All	542	1	34	0.0867	3.0164	5.12065	Up	7.32496e-10	9.71128e-09
CL6190.Contig6_All	1175	12	408	0.4801	16.6965	5.12007	Up	2.3514e-106	3.28451e-104
Unigene32002_All	618	1	34	0.0761	2.6454	5.11945	Up	7.32496e-10	9.71023e-09
CL1858.Contig1_All	585	1	34	0.0804	2.7946	5.1193	Up	7.32496e-10	9.70918e-09
CL9714.Contig1_All	1106	123	4139	5.2286	179.946	5.105	Up	0	0
CL9635.Contig4_All	1135	5	166	0.2071	7.0326	5.08566	Up	6.50848e-44	3.97657e-42
Unigene31531_All	934	1	33	0.0503	1.6989	5.0779	Up	1.44159e-09	1.85151e-08
CL8185.Contig6_All	1465	7	231	0.2246	7.5819	5.07713	Up	1.47864e-60	1.21895e-58
Unigene15541_All	602	1	33	0.0781	2.6358	5.07677	Up	1.44159e-09	1.85132e-08
CL4540.Contig3_All	3412	38	1247	0.5236	17.5736	5.0688	Up	0	0
CL11310.Contig4_All	1080	102	3341	4.4403	148.749	5.06608	Up	0	0
CL4948.Contig4_All	1010	4	130	0.1862	6.1891	5.0548	Up	1.48753e-34	7.14609e-33
CL9831.Contig3_All	649	4	130	0.2898	9.6317	5.05466	Up	1.48753e-34	7.1489e-33
Unigene28846_All	965	1	32	0.0487	1.5945	5.03304	Up	2.83492e-09	3.52751e-08
CL8373.Contig1_All	1455	1	32	0.0323	1.0575	5.03298	Up	2.83492e-09	3.52679e-08
CL4540.Contig5_All	3811	102	3265	1.2583	41.1952	5.03293	Up	0	0
Unigene11392_All	768	1	32	0.0612	2.0035	5.03285	Up	2.83492e-09	3.52787e-08
CL13993.Contig6_All	277	1	32	0.1697	5.5549	5.0327	Up	2.83492e-09	3.525e-08
Unigene22246_All	452	1	32	0.104	3.4042	5.03266	Up	2.83492e-09	3.52823e-08
Unigene11671_All	1114	1	32	0.0422	1.3812	5.03254	Up	2.83492e-09	3.52608e-08
Unigene1872_All	590	1	32	0.0797	2.608	5.03222	Up	2.83492e-09	3.52572e-08
CL2842.Contig2_All	295	1	32	0.1594	5.2159	5.03219	Up	2.83492e-09	3.52536e-08
CL17488.Contig6_All	887	970	31034	51.4139	1682.35	5.03218	Up	0	0
CL3419.Contig1_All	743	2	64	0.1266	4.1418	5.03191	Up	1.51309e-17	3.61178e-16
Unigene11673_All	1261	1	32	0.0373	1.2202	5.0318	Up	2.83492e-09	3.52644e-08
CL3223.Contig4_All	3933	1	32	0.012	0.3912	5.0268	Up	2.83492e-09	3.52715e-08
Unigene26843_All	2173	15	469	0.3245	10.378	4.99917	Up	1.42481e-120	2.25215e-118
CL17488.Contig3_All	967	150	4653	7.2928	231.371	4.98759	Up	0	0
CL11134.Contig1_All	1263	1	31	0.0372	1.1802	4.98758	Up	5.57042e-09	6.70388e-08
Unigene18896_All	430	1	31	0.1093	3.4665	4.98711	Up	5.57042e-09	6.70256e-08
CL2127.Contig2_All	437	1	31	0.1076	3.411	4.98644	Up	5.57042e-09	6.70322e-08
Unigene22693_All	697	1	31	0.0675	2.1386	4.98564	Up	5.57042e-09	6.7019e-08
CL17488.Contig4_All	952	356	10962	17.5811	553.676	4.97694	Up	0	0
CL1862.Contig3_All	1203	4	123	0.1563	4.9163	4.97518	Up	1.66428e-32	7.4735e-31
CL1862.Contig10_All	1904	4	123	0.0988	3.1063	4.97454	Up	1.66428e-32	7.47624e-31
CL17488.Contig1_All	902	379	11645	19.7544	620.777	4.97383	Up	0	0
CL8185.Contig7_All	1609	29	882	0.8474	26.3582	4.95906	Up	1.89119e-224	5.596e-222
CL10979.Contig2_All	349	9	272	1.2124	37.4754	4.95001	Up	3.66208e-70	3.44292e-68
CL5850.Contig2_All	3283	1	30	0.0143	0.4394	4.94145	Up	1.09359e-08	1.27661e-07
CL10954.Contig2_All	1731	2	60	0.0543	1.6667	4.9399	Up	2.2417e-16	4.96318e-15
Unigene38641_All	327	1	30	0.1438	4.4114	4.9391	Up	1.09359e-08	1.27685e-07
CL14837.Contig2_All	879	1	30	0.0535	1.6411	4.93898	Up	1.09359e-08	1.27698e-07
CL13993.Contig2_All	1401	1	30	0.0336	1.0296	4.93748	Up	1.09359e-08	1.27673e-07
Unigene18008_All	1101	49	1457	2.0924	63.6319	4.92652	Up	0	0
CL1581.Contig2_All	1862	130	3840	3.2824	99.164	4.91699	Up	0	0
CL17680.Contig2_All	395	3	88	0.3571	10.7124	4.90681	Up	1.98045e-23	6.313e-22
Unigene20007_All	679	1	29	0.0692	2.0537	4.89131	Up	2.145e-08	2.42338e-07
CL4540.Contig2_All	3777	66	1910	0.8215	24.3158	4.88749	Up	0	0
CL6069.Contig1_All	1755	15	431	0.4018	11.8087	4.87723	Up	1.74229e-109	2.50216e-107
Unigene30542_All	486	3	86	0.2902	8.5087	4.87382	Up	7.58606e-23	2.35805e-21
Unigene1479_All	825	6	171	0.3419	9.9665	4.86544	Up	3.34932e-44	2.07012e-42
CL10052.Contig1_All	1270	1	28	0.037	1.0601	4.84053	Up	4.2031e-08	4.56502e-07
Unigene654_All	1073	2	56	0.0876	2.5095	4.84033	Up	3.29488e-15	6.80886e-14
Unigene27955_All	1418	2	56	0.0663	1.899	4.84009	Up	3.29488e-15	6.80657e-14
Unigene9665_All	1264	1	28	0.0372	1.0652	4.83968	Up	4.2031e-08	4.56583e-07
CL11310.Contig6_All	420	2	56	0.2239	6.4112	4.83967	Up	3.29488e-15	6.80771e-14
CL8185.Contig5_All	1674	10	280	0.2809	8.0428	4.83957	Up	2.48858e-71	2.36689e-69
Unigene14432_All	1086	1	28	0.0433	1.2397	4.83948	Up	4.2031e-08	4.56461e-07
CL17230.Contig1_All	935	1	28	0.0503	1.44	4.83937	Up	4.2031e-08	4.56542e-07
Unigene15198_All	1131	1	28	0.0416	1.1904	4.83872	Up	4.2031e-08	4.56421e-07
CL7671.Contig5_All	2332	14	391	0.2822	8.0621	4.83637	Up	5.25978e-99	6.89865e-97
CL14005.Contig2_All	1449	11	303	0.3569	10.0549	4.81624	Up	7.17262e-77	7.3837e-75
CL16739.Contig1_All	700	2	55	0.1343	3.778	4.81409	Up	6.4426e-15	1.30086e-13
Unigene38642_All	430	2	55	0.2187	6.1503	4.81363	Up	6.4426e-15	1.30043e-13
CL1260.Contig6_All	972	4	110	0.1935	5.4416	4.81363	Up	1.02728e-28	4.02957e-27
CL16464.Contig1_All	1647	2	55	0.0571	1.6057	4.81357	Up	6.4426e-15	1.30022e-13
CL17503.Contig1_All	1878	2	55	0.0501	1.4082	4.8129	Up	6.4426e-15	1.30064e-13
Unigene21166_All	1026	12	329	0.5499	15.4188	4.80938	Up	2.78432e-83	3.09234e-81
Unigene12566_All	1762	4	109	0.1067	2.9746	4.80106	Up	2.00628e-28	7.81722e-27
CL4753.Contig3_All	601	1	27	0.0782	2.1602	4.78785	Up	8.2274e-08	8.59153e-07
CL8905.Contig1_All	456	1	27	0.1031	2.8471	4.78738	Up	8.2274e-08	8.5908e-07
CL8912.Contig3_All	2242	21	567	0.4404	12.1605	4.78724	Up	4.25912e-142	7.91731e-140
CL4586.Contig2_All	797	1	27	0.059	1.629	4.78713	Up	8.2274e-08	8.59373e-07
Unigene17806_All	756	1	27	0.0622	1.7173	4.78708	Up	8.2274e-08	8.593e-07
CL1858.Contig2_All	529	1	27	0.0889	2.4542	4.78693	Up	8.2274e-08	8.59227e-07
Unigene6949_All	639	1	27	0.0736	2.0317	4.78684	Up	8.2274e-08	8.59447e-07
CL14108.Contig3_All	5316	7	188	0.0619	1.7005	4.77988	Up	5.2097e-48	3.46471e-46
Unigene14367_All	5444	1035	27626	8.9383	244.007	4.77078	Up	0	0
Unigene31757_All	730	2	53	0.1288	3.491	4.76044	Up	2.45888e-14	4.76761e-13
CL11904.Contig2_All	2508	2	53	0.0375	1.0161	4.76001	Up	2.45888e-14	4.76686e-13
CL6112.Contig2_All	2239	8	211	0.168	4.5314	4.75342	Up	1.46529e-53	1.09186e-51
CL7759.Contig1_All	1996	3	79	0.0707	1.9031	4.7505	Up	8.24406e-21	2.33885e-19
Unigene23827_All	713	318	8320	20.9686	561.095	4.74194	Up	0	0
Unigene16087_All	1019	1	26	0.0461	1.2269	4.73411	Up	1.60868e-07	1.61889e-06
Unigene6765_All	683	1	26	0.0688	1.8304	4.73361	Up	1.60868e-07	1.61862e-06
Unigene19813_All	612	1	26	0.0768	2.0428	4.7333	Up	1.60868e-07	1.61929e-06
CL15365.Contig2_All	1655	1	26	0.0284	0.7554	4.73328	Up	1.60868e-07	1.61915e-06
Unigene18422_All	809	63	1638	3.6612	97.3571	4.7329	Up	0	0
CL9328.Contig2_All	676	2	52	0.1391	3.6988	4.73286	Up	4.7992e-14	9.10785e-13
CL13351.Contig2_All	911	20	520	1.0322	27.4465	4.73283	Up	1.32262e-129	2.25346e-127
CL3889.Contig2_All	931	1	26	0.0505	1.3428	4.73282	Up	1.60868e-07	1.61875e-06
CL637.Contig4_All	2167	1	26	0.0217	0.5769	4.73255	Up	1.60868e-07	1.61902e-06
CL15490.Contig2_All	1197	2	52	0.0786	2.0889	4.73207	Up	4.7992e-14	9.10644e-13
CL2609.Contig2_All	674	1	26	0.0698	1.8549	4.73197	Up	1.60868e-07	1.61849e-06
CL7724.Contig1_All	984	3	77	0.1433	3.7627	4.71466	Up	3.13512e-20	8.64607e-19
Unigene19383_All	1198	2	51	0.0785	2.047	4.70467	Up	9.361e-14	1.74144e-12
CL17488.Contig2_All	862	142	3611	7.7449	201.429	4.70088	Up	0	0
CL16743.Contig4_All	4824	13	329	0.1267	3.2794	4.69394	Up	3.72584e-82	4.0752e-80
CL6969.Contig1_All	1358	30	759	1.0386	26.8747	4.69354	Up	1.51171e-187	3.73362e-185
Unigene15571_All	785	4	101	0.2396	6.1866	4.69045	Up	4.19744e-26	1.50261e-24
CL16852.Contig2_All	1449	1	25	0.0324	0.8296	4.67835	Up	3.14168e-07	3.02588e-06
Unigene32007_All	983	1	25	0.0478	1.2229	4.67715	Up	3.14168e-07	3.02755e-06
CL2214.Contig2_All	2021	2	50	0.0465	1.1896	4.6771	Up	1.82466e-13	3.32378e-12
Unigene25075_All	642	1	25	0.0732	1.8724	4.6769	Up	3.14168e-07	3.02731e-06
Unigene26170_All	367	1	25	0.1281	3.2755	4.67637	Up	3.14168e-07	3.02612e-06
Unigene18757_All	802	4	100	0.2345	5.9955	4.67622	Up	8.1731e-26	2.8937e-24
CL11683.Contig1_All	666	1	25	0.0706	1.805	4.67619	Up	3.14168e-07	3.02779e-06
CL17515.Contig1_All	1225	6	150	0.2303	5.8879	4.67617	Up	4.1659e-38	2.20255e-36
Unigene7205_All	670	1	25	0.0702	1.7942	4.67573	Up	3.14168e-07	3.02565e-06
CL4727.Contig2_All	1080	2	50	0.0871	2.2261	4.6757	Up	1.82466e-13	3.32428e-12
Unigene16115_All	1036	1	25	0.0454	1.1603	4.67566	Up	3.14168e-07	3.02636e-06
CL8347.Contig2_All	700	1	25	0.0672	1.7173	4.67554	Up	3.14168e-07	3.0266e-06
CL2414.Contig8_All	2364	3	75	0.0597	1.5255	4.67541	Up	1.19007e-19	3.1845e-18
CL3090.Contig3_All	658	1	25	0.0715	1.8269	4.67531	Up	3.14168e-07	3.02707e-06
Unigene19230_All	748	1	25	0.0629	1.6071	4.67526	Up	3.14168e-07	3.02684e-06
CL10923.Contig1_All	574	7	173	0.5733	14.4923	4.65985	Up	1.1517e-43	6.97754e-42
CL1558.Contig5_All	2873	4	98	0.0655	1.6402	4.64623	Up	3.09536e-25	1.07267e-23
CL1431.Contig1_All	591	3	73	0.2387	5.9393	4.63702	Up	4.50876e-19	1.17119e-17
CL13611.Contig2_All	1874	25	608	0.6272	15.6004	4.63651	Up	1.7732e-149	3.51489e-147
CL15764.Contig2_All	1745	1	24	0.0269	0.6613	4.61963	Up	6.1277e-07	5.65892e-06
CL4650.Contig4_All	1420	1	24	0.0331	0.8127	4.61782	Up	6.1277e-07	5.6602e-06
CL12116.Contig4_All	317	1	24	0.1483	3.6404	4.61751	Up	6.1277e-07	5.65849e-06
Unigene35087_All	281	1	24	0.1673	4.1068	4.61751	Up	6.1277e-07	5.65721e-06
CL17378.Contig2_All	1751	2	48	0.0537	1.3181	4.61739	Up	6.918e-13	1.21032e-11
CL16961.Contig2_All	353	3	72	0.3996	9.8075	4.61726	Up	8.76948e-19	2.23855e-17
Unigene27585_All	486	2	48	0.1935	4.7491	4.61725	Up	6.918e-13	1.21015e-11
Unigene9495_All	818	1	24	0.0575	1.4108	4.61681	Up	6.1277e-07	5.65807e-06
CL5176.Contig4_All	1238	1	24	0.038	0.9322	4.61657	Up	6.1277e-07	5.65764e-06
Unigene4780_All	2141	1	24	0.022	0.539	4.61471	Up	6.1277e-07	5.65934e-06
Unigene29998_All	2709	1	24	0.0174	0.426	4.61369	Up	6.1277e-07	5.65977e-06
CL658.Contig5_All	3315	36	859	0.5106	12.4598	4.60894	Up	8.89856e-210	2.43868e-207
CL13.Contig4_All	1874	4	94	0.1004	2.4119	4.58634	Up	4.41924e-24	1.45177e-22
CL2414.Contig6_All	5131	19	441	0.1741	4.1327	4.5691	Up	6.72342e-108	9.54383e-106
CL5601.Contig2_All	695	1	23	0.0676	1.5913	4.55704	Up	1.19354e-06	1.05097e-05
Unigene40764_All	549	1	23	0.0856	2.0145	4.55667	Up	1.19354e-06	1.05157e-05
CL6741.Contig2_All	2117	1	23	0.0222	0.5224	4.55652	Up	1.19354e-06	1.05134e-05
Unigene40585_All	253	1	23	0.1858	4.3713	4.55624	Up	1.19354e-06	1.05127e-05
CL1131.Contig5_All	271	1	23	0.1735	4.0809	4.55588	Up	1.19354e-06	1.05142e-05
CL6976.Contig3_All	1359	6	138	0.2076	4.8827	4.5558	Up	1.20722e-34	5.81315e-33
Unigene40580_All	750	1	23	0.0627	1.4746	4.55571	Up	1.19354e-06	1.05104e-05
CL1289.Contig12_All	1976	1	23	0.0238	0.5597	4.55562	Up	1.19354e-06	1.05112e-05
CL4054.Contig5_All	442	1	23	0.1064	2.5021	4.55557	Up	1.19354e-06	1.0515e-05
Unigene18121_All	876	1	23	0.0537	1.2625	4.55522	Up	1.19354e-06	1.05119e-05
CL158.Contig2_All	706	9	206	0.5993	14.0302	4.54911	Up	5.02338e-51	3.5407e-49
CL6069.Contig3_All	1625	13	296	0.3761	8.7587	4.54153	Up	1.22273e-72	1.18879e-70
CL12116.Contig1_All	1129	3	68	0.1249	2.8961	4.53527	Up	1.24831e-17	2.99433e-16
Unigene38971_All	1475	2	45	0.0637	1.467	4.52543	Up	5.07796e-12	8.25014e-11
CL5437.Contig5_All	1260	2	45	0.0746	1.7173	4.52482	Up	5.07796e-12	8.25123e-11
Unigene9740_All	695	2	45	0.1353	3.1134	4.52426	Up	5.07796e-12	8.25232e-11
Unigene6519_All	992	2	45	0.0948	2.1812	4.52409	Up	5.07796e-12	8.25342e-11
Unigene27888_All	468	71	1572	7.1325	161.514	4.5011	Up	0	0
CL5880.Contig1_All	2103	37	819	0.8272	18.7261	4.50067	Up	3.37578e-197	8.74291e-195
CL12722.Contig3_All	2216	18	398	0.3819	8.6361	4.49911	Up	1.29653e-96	1.64588e-94
Unigene22089_All	986	20	441	0.9536	21.5062	4.49522	Up	7.87098e-107	1.10702e-104
Unigene23792_All	1597	1	22	0.0294	0.6624	4.49381	Up	2.3213e-06	1.9509e-05
Unigene13206_All	463	1	22	0.1015	2.2848	4.49252	Up	2.3213e-06	1.95037e-05
Unigene13988_All	1119	1	22	0.042	0.9454	4.49246	Up	2.3213e-06	1.94983e-05
Unigene9727_All	1111	2	44	0.0846	1.9043	4.49246	Up	9.85236e-12	1.56076e-10
CL6361.Contig6_All	1054	1	22	0.0446	1.0037	4.49214	Up	2.3213e-06	1.95064e-05
CL11236.Contig1_All	277	1	22	0.1697	3.819	4.49214	Up	2.3213e-06	1.9501e-05
CL14542.Contig2_All	756	5	110	0.3109	6.9964	4.49209	Up	1.21593e-27	4.59026e-26
Unigene41192_All	416	1	22	0.113	2.5429	4.49208	Up	2.3213e-06	1.94997e-05
Unigene13379_All	721	1	22	0.0652	1.4672	4.49205	Up	2.3213e-06	1.94957e-05
Unigene19171_All	546	1	22	0.0861	1.9375	4.49204	Up	2.3213e-06	1.9497e-05
CL4266.Contig1_All	1644	2	44	0.0572	1.2869	4.49174	Up	9.85236e-12	1.56096e-10
CL8355.Contig4_All	437	1	22	0.1076	2.4207	4.49167	Up	2.3213e-06	1.9505e-05
Unigene3006_All	761	1	22	0.0618	1.3901	4.49144	Up	2.3213e-06	1.95024e-05
Unigene7217_All	639	1	22	0.0736	1.6555	4.49142	Up	2.3213e-06	1.95131e-05
Unigene9730_All	1136	1	22	0.0414	0.9312	4.49139	Up	2.3213e-06	1.95077e-05
Unigene14544_All	1289	1	22	0.0365	0.8207	4.49089	Up	2.3213e-06	1.95104e-05
Unigene9121_All	1168	1	22	0.0403	0.9057	4.49018	Up	2.3213e-06	1.95117e-05
CL8924.Contig2_All	833	8	175	0.4515	10.1017	4.48373	Up	3.55854e-43	2.1369e-41
CL2656.Contig6_All	1258	6	131	0.2242	5.0072	4.48115	Up	1.23907e-32	5.59074e-31
CL1814.Contig1_All	5140	3	65	0.0274	0.6081	4.47206	Up	9.09324e-17	2.0663e-15
CL8273.Contig3_All	2650	36	779	0.6387	14.1349	4.46798	Up	8.58206e-187	2.11108e-184
CL1419.Contig4_All	2051	1734	37355	39.748	875.761	4.46158	Up	0	0
CL8355.Contig3_All	2929	4	86	0.0642	1.4118	4.45882	Up	8.82636e-22	2.6263e-20
Unigene1509_All	1333	119	2558	4.1971	92.2726	4.45844	Up	0	0
CL4582.Contig3_All	596	2	43	0.1578	3.4692	4.45843	Up	1.90988e-11	2.95373e-10
CL8228.Contig1_All	899	4	85	0.2092	4.5463	4.44174	Up	1.70777e-21	5.0133e-20
Unigene14997_All	1065	1	21	0.0441	0.9481	4.42619	Up	4.50742e-06	3.62767e-05
CL4881.Contig12_All	1211	1	21	0.0388	0.8338	4.42557	Up	4.50742e-06	3.62672e-05
Unigene26880_All	1626	2	42	0.0578	1.242	4.42545	Up	3.6989e-11	5.58033e-10
Unigene31377_All	731	1	21	0.0643	1.3814	4.42517	Up	4.50742e-06	3.62648e-05
CL5850.Contig1_All	3197	1	21	0.0147	0.3158	4.42512	Up	4.50742e-06	3.62791e-05
CL3722.Contig3_All	350	1	21	0.1343	2.8851	4.42509	Up	4.50742e-06	3.6291e-05
Unigene31756_All	847	1	21	0.0555	1.1922	4.42499	Up	4.50742e-06	3.62743e-05
Unigene39222_All	411	1	21	0.1144	2.4569	4.42468	Up	4.50742e-06	3.63006e-05
Unigene16152_All	548	1	21	0.0858	1.8426	4.42462	Up	4.50742e-06	3.62934e-05
CL4820.Contig3_All	922	2	42	0.102	2.1904	4.42455	Up	3.6989e-11	5.58102e-10
Unigene25667_All	632	1	21	0.0744	1.5977	4.42455	Up	4.50742e-06	3.62863e-05
Unigene28709_All	447	1	21	0.1052	2.259	4.42448	Up	4.50742e-06	3.62958e-05
CL2061.Contig2_All	457	1	21	0.1029	2.2096	4.42447	Up	4.50742e-06	3.6272e-05
Unigene39029_All	366	1	21	0.1285	2.7589	4.42425	Up	4.50742e-06	3.6303e-05
Unigene25396_All	518	1	21	0.0908	1.9494	4.42419	Up	4.50742e-06	3.62839e-05
CL12173.Contig1_All	749	1	21	0.0628	1.3482	4.42413	Up	4.50742e-06	3.62886e-05
CL3122.Contig1_All	1952	3	63	0.0723	1.5519	4.4239	Up	3.4064e-16	7.45828e-15
Unigene27214_All	765	1	21	0.0615	1.32	4.42381	Up	4.50742e-06	3.62815e-05
CL15844.Contig1_All	1023	1	21	0.046	0.9871	4.42349	Up	4.50742e-06	3.62982e-05
CL11893.Contig2_All	1913	1	21	0.0246	0.5278	4.42326	Up	4.50742e-06	3.63053e-05
CL3061.Contig11_All	2210	1	21	0.0213	0.4569	4.42295	Up	4.50742e-06	3.62696e-05
CL8185.Contig12_All	1616	53	1104	1.5419	32.8496	4.41309	Up	6.01054e-262	2.06827e-259
CL2289.Contig5_All	1847	12	249	0.3055	6.4824	4.40728	Up	3.23772e-60	2.6548e-58
CL1862.Contig13_All	1188	7	145	0.277	5.8689	4.40513	Up	1.29029e-35	6.37868e-34
Unigene22641_All	1203	3	62	0.1172	2.4782	4.40225	Up	6.5865e-16	1.41953e-14
CL8347.Contig1_All	1287	3	62	0.1096	2.3164	4.40156	Up	6.5865e-16	1.41978e-14
CL13407.Contig1_All	3895	19	392	0.2293	4.8393	4.39949	Up	7.48424e-94	9.23297e-92
CL5806.Contig5_All	1752	2	41	0.0537	1.1253	4.38924	Up	7.1568e-11	1.05173e-09
Unigene18933_All	1639	2	41	0.0574	1.2028	4.3892	Up	7.1568e-11	1.05186e-09
CL6275.Contig1_All	1739	6	121	0.1622	3.3457	4.36646	Up	9.00158e-30	3.67693e-28
CL593.Contig2_All	1626	30	605	0.8674	17.8911	4.3664	Up	2.59652e-143	4.87851e-141
CL1814.Contig8_All	3090	1	20	0.0152	0.3112	4.3557	Up	8.73714e-06	6.67114e-05
Unigene31310_All	830	1	20	0.0566	1.1587	4.35556	Up	8.73714e-06	6.66615e-05
CL4881.Contig11_All	1364	2	40	0.0689	1.4101	4.35515	Up	1.38333e-10	1.973e-09
CL14279.Contig1_All	428	1	20	0.1098	2.2469	4.35499	Up	8.73714e-06	6.66864e-05
Unigene2838_All	802	1	20	0.0586	1.1991	4.35491	Up	8.73714e-06	6.66449e-05
Unigene1821_All	940	1	20	0.05	1.0231	4.35488	Up	8.73714e-06	6.67197e-05
CL15814.Contig1_All	1000	1	20	0.047	0.9617	4.35485	Up	8.73714e-06	6.66823e-05
Unigene9797_All	752	1	20	0.0625	1.2788	4.35479	Up	8.73714e-06	6.6703e-05
CL8707.Contig2_All	1152	1	20	0.0408	0.8348	4.35479	Up	8.73714e-06	6.67322e-05
CL2247.Contig13_All	809	1	20	0.0581	1.1887	4.3547	Up	8.73714e-06	6.66366e-05
CL1598.Contig5_All	314	1	20	0.1497	3.0627	4.35466	Up	8.73714e-06	6.66989e-05
CL6467.Contig6_All	499	1	20	0.0942	1.9272	4.35464	Up	8.73714e-06	6.66947e-05
Unigene28340_All	536	1	20	0.0877	1.7942	4.35462	Up	8.73714e-06	6.67155e-05
Unigene18867_All	610	3	60	0.2312	4.7296	4.3545	Up	2.45734e-15	5.1239e-14
Unigene28980_All	498	1	20	0.0944	1.9311	4.35449	Up	8.73714e-06	6.66408e-05
Unigene49275_All	365	1	20	0.1288	2.6348	4.35449	Up	8.73714e-06	6.66657e-05
Unigene40365_All	497	1	20	0.0946	1.935	4.35435	Up	8.73714e-06	6.6674e-05
CL5989.Contig5_All	2222	5	100	0.1058	2.164	4.35429	Up	8.84814e-25	3.0017e-23
Unigene1948_All	526	1	20	0.0894	1.8283	4.35408	Up	8.73714e-06	6.67363e-05
Unigene38819_All	293	1	20	0.1605	3.2822	4.35402	Up	8.73714e-06	6.67446e-05
CL4340.Contig2_All	740	2	40	0.1271	2.5991	4.35398	Up	1.38333e-10	1.97323e-09
CL1782.Contig3_All	736	1	20	0.0639	1.3066	4.35386	Up	8.73714e-06	6.66906e-05
Unigene17432_All	522	1	20	0.0901	1.8423	4.35384	Up	8.73714e-06	6.66781e-05
CL16924.Contig2_All	518	1	20	0.0908	1.8565	4.35375	Up	8.73714e-06	6.66698e-05
Unigene4929_All	1739	2	40	0.0541	1.106	4.35358	Up	1.38333e-10	1.97346e-09
Unigene20924_All	926	1	20	0.0508	1.0385	4.35353	Up	8.73714e-06	6.66574e-05
CL18013.Contig2_All	926	1	20	0.0508	1.0385	4.35353	Up	8.73714e-06	6.66491e-05
Unigene9917_All	970	1	20	0.0485	0.9914	4.35341	Up	8.73714e-06	6.67405e-05
Unigene4178_All	1156	1	20	0.0407	0.8319	4.35331	Up	8.73714e-06	6.6728e-05
CL8629.Contig5_All	1601	1	20	0.0294	0.6007	4.35276	Up	8.73714e-06	6.67238e-05
CL17836.Contig2_All	1286	1	20	0.0366	0.7478	4.35274	Up	8.73714e-06	6.67072e-05
CL17146.Contig10_All	2093	1	20	0.0225	0.4595	4.35207	Up	8.73714e-06	6.66532e-05
CL6058.Contig2_All	4273	76	1499	0.8362	16.8683	4.33432	Up	0	0
Unigene19437_All	1147	5	98	0.2049	4.1083	4.32555	Up	3.28844e-24	1.08935e-22
Unigene32102_All	597	2	39	0.1575	3.1412	4.31789	Up	2.67102e-10	3.70561e-09
CL14188.Contig1_All	923	2	39	0.1019	2.0317	4.31746	Up	2.67102e-10	3.70477e-09
Unigene1338_All	1136	2	39	0.0828	1.6508	4.31739	Up	2.67102e-10	3.70519e-09
CL10733.Contig2_All	2200	8	155	0.171	3.3878	4.30828	Up	1.83892e-37	9.56568e-36
CL15290.Contig1_All	1521	1779	34130	54.9894	1078.97	4.29436	Up	0	0
CL11268.Contig2_All	2186	29	556	0.6237	12.23	4.29343	Up	2.19368e-130	3.75321e-128
CL3127.Contig1_All	1202	106	2032	4.146	81.2871	4.29323	Up	0	0
CL5044.Contig3_All	2229	44	842	0.9281	18.1637	4.29063	Up	1.56882e-196	4.04597e-194
CL13295.Contig1_All	857	1322	25225	72.5242	1415.31	4.28652	Up	0	0
Unigene5947_All	1249	1	19	0.0376	0.7315	4.28205	Up	1.69039e-05	0.000122277
Unigene27457_All	1021	1	19	0.046	0.8948	4.28186	Up	1.69039e-05	0.000122227
CL7408.Contig1_All	1100	1	19	0.0427	0.8305	4.28167	Up	1.69039e-05	0.000122212
CL1814.Contig3_All	3981	1	19	0.0118	0.2295	4.28164	Up	1.69039e-05	0.000122256
Unigene12910_All	803	1	19	0.0585	1.1377	4.28154	Up	1.69039e-05	0.00012214
CL263.Contig5_All	774	1	19	0.0607	1.1804	4.28144	Up	1.69039e-05	0.000122263
CL15554.Contig1_All	1392	2	38	0.0675	1.3126	4.2814	Up	5.15166e-10	6.94343e-09
CL7034.Contig2_All	985	1	19	0.0477	0.9275	4.28129	Up	1.69039e-05	0.000122169
Unigene1817_All	594	1	19	0.0791	1.538	4.28123	Up	1.69039e-05	0.000122111
CL7891.Contig1_All	1026	1	19	0.0458	0.8904	4.28103	Up	1.69039e-05	0.000122184
Unigene25247_All	636	1	19	0.0739	1.4365	4.28084	Up	1.69039e-05	0.000122119
Unigene11438_All	1000	1	19	0.047	0.9136	4.28083	Up	1.69039e-05	0.00012222
Unigene2659_All	829	1	19	0.0567	1.1021	4.28076	Up	1.69039e-05	0.00012227
Unigene6135_All	853	1	19	0.0551	1.071	4.28076	Up	1.69039e-05	0.000122176
Unigene26240_All	524	1	19	0.0897	1.7435	4.28073	Up	1.69039e-05	0.000122133
Unigene7871_All	350	1	19	0.1343	2.6103	4.28068	Up	1.69039e-05	0.000122126
CL3579.Contig7_All	2374	3	57	0.0594	1.1545	4.28066	Up	1.76106e-14	3.44346e-13
CL13407.Contig5_All	1538	3	57	0.0917	1.7821	4.28051	Up	1.76106e-14	3.44401e-13
Unigene29421_All	557	1	19	0.0844	1.6402	4.28048	Up	1.69039e-05	0.000122306
CL5135.Contig1_All	781	1	19	0.0602	1.1698	4.28035	Up	1.69039e-05	0.000122155
Unigene1771_All	827	2	38	0.1137	2.2094	4.28035	Up	5.15166e-10	6.94267e-09
CL3172.Contig1_All	319	1	19	0.1474	2.8639	4.28017	Up	1.69039e-05	0.000122241
CL14170.Contig3_All	538	1	19	0.0874	1.6981	4.28014	Up	1.69039e-05	0.000122248
Unigene16243_All	797	1	19	0.059	1.1463	4.28013	Up	1.69039e-05	0.000122198
Unigene13632_All	475	1	19	0.099	1.9234	4.28009	Up	1.69039e-05	0.000122162
Unigene39679_All	344	1	19	0.1367	2.6558	4.28006	Up	1.69039e-05	0.000122147
CL11893.Contig3_All	1844	1	19	0.0255	0.4954	4.28002	Up	1.69039e-05	0.000122191
Unigene28428_All	736	1	19	0.0639	1.2413	4.27989	Up	1.69039e-05	0.000122313
CL6838.Contig5_All	647	1	19	0.0727	1.4121	4.27974	Up	1.69039e-05	0.000122292
Unigene30699_All	657	1	19	0.0716	1.3906	4.2796	Up	1.69039e-05	0.000122299
CL15776.Contig2_All	1936	1	19	0.0243	0.4719	4.27945	Up	1.69039e-05	0.000122205
Unigene26587_All	2100	1	19	0.0224	0.435	4.27944	Up	1.69039e-05	0.000122234
CL15225.Contig1_All	1549	1	19	0.0304	0.5898	4.27808	Up	1.69039e-05	0.000122285
CL11184.Contig4_All	3300	22	415	0.3134	6.047	4.27014	Up	2.31638e-97	2.96511e-95
Unigene20374_All	2599	11	207	0.199	3.8297	4.26639	Up	2.90242e-49	1.972e-47
CL7497.Contig2_All	1245	25	469	0.9441	18.1136	4.26199	Up	1.0804e-109	1.55891e-107
CL15476.Contig4_All	3741	4	75	0.0503	0.964	4.2604	Up	1.21931e-18	3.08676e-17
Unigene14893_All	3780	11	206	0.1368	2.6205	4.2597	Up	5.57742e-49	3.76444e-47
CL1043.Contig9_All	2373	3	56	0.0594	1.1347	4.2557	Up	3.38994e-14	6.51411e-13
CL8273.Contig7_All	2054	9	168	0.206	3.9329	4.25488	Up	3.62122e-40	2.01365e-38
CL2247.Contig9_All	2678	3	56	0.0527	1.0055	4.25397	Up	3.38994e-14	6.51309e-13
Unigene11839_All	3069	35	649	0.5362	10.1683	4.24516	Up	8.84888e-151	1.77125e-148
Unigene18785_All	622	15	278	1.1338	21.491	4.24449	Up	1.88238e-65	1.65539e-63
Unigene39115_All	838	2	37	0.1122	2.123	4.24196	Up	9.9246e-10	1.29878e-08
CL340.Contig8_All	923	8	148	0.4075	7.7101	4.24188	Up	1.78749e-35	8.79757e-34
CL2668.Contig6_All	1176	6	110	0.2399	4.4977	4.22868	Up	1.20979e-26	4.40553e-25
CL13351.Contig1_All	1731	21	384	0.5704	10.6669	4.22502	Up	1.44327e-89	1.70167e-87
CL5882.Contig5_All	1926	11	201	0.2685	5.0181	4.22415	Up	1.4562e-47	9.63212e-46
Unigene25043_All	898	4	73	0.2094	3.9088	4.22239	Up	4.50568e-18	1.10701e-16
CL7780.Contig2_All	730	4	73	0.2576	4.8084	4.22235	Up	4.50568e-18	1.10679e-16
CL9635.Contig3_All	1657	37	675	1.0498	19.5877	4.22176	Up	3.64782e-156	7.51034e-154
CL17849.Contig2_All	1215	12	218	0.4643	8.6275	4.21581	Up	2.11842e-51	1.50267e-49
CL11184.Contig3_All	2561	34	616	0.6242	11.5657	4.2117	Up	1.99189e-142	3.71402e-140
CL15011.Contig3_All	2553	15	271	0.2762	5.1041	4.20787	Up	1.80311e-63	1.54898e-61
CL2555.Contig13_All	2358	1	18	0.0199	0.3671	4.20533	Up	3.26366e-05	0.000223043
CL6536.Contig2_All	2247	1	18	0.0209	0.3852	4.20403	Up	3.26366e-05	0.000223168
Unigene6821_All	1037	1	18	0.0453	0.8346	4.2035	Up	3.26366e-05	0.000223193
CL8964.Contig1_All	989	1	18	0.0475	0.8751	4.20345	Up	3.26366e-05	0.000222894
CL5601.Contig3_All	1185	2	36	0.0793	1.4608	4.20329	Up	1.90964e-09	2.42319e-08
Unigene3916_All	1719	3	54	0.082	1.5105	4.20326	Up	1.25295e-13	2.31122e-12
Unigene3423_All	690	1	18	0.0681	1.2544	4.2032	Up	3.26366e-05	0.000223205
Unigene26296_All	682	1	18	0.0689	1.2691	4.20316	Up	3.26366e-05	0.000223118
Unigene31663_All	867	1	18	0.0542	0.9983	4.20311	Up	3.26366e-05	0.000222969
Unigene9260_All	872	1	18	0.0539	0.9926	4.20286	Up	3.26366e-05	0.00022318
CL2868.Contig15_All	872	1	18	0.0539	0.9926	4.20286	Up	3.26366e-05	0.000222931
CL7304.Contig3_All	432	1	18	0.1088	2.0035	4.20277	Up	3.26366e-05	0.000222906
CL12385.Contig1_All	544	1	18	0.0864	1.591	4.20276	Up	3.26366e-05	0.000222956
Unigene6598_All	576	1	18	0.0816	1.5026	4.20275	Up	3.26366e-05	0.000223143
Unigene41786_All	299	1	18	0.1572	2.8947	4.20274	Up	3.26366e-05	0.000222993
Unigene12832_All	464	1	18	0.1013	1.8653	4.2027	Up	3.26366e-05	0.000223255
CL4582.Contig5_All	499	1	18	0.0942	1.7345	4.20265	Up	3.26366e-05	0.000223018
CL3397.Contig2_All	358	1	18	0.1313	2.4176	4.20264	Up	3.26366e-05	0.000222919
Unigene12960_All	565	1	18	0.0832	1.5319	4.20259	Up	3.26366e-05	0.000223155
Unigene8593_All	652	1	18	0.0721	1.3275	4.20257	Up	3.26366e-05	0.000223056
CL7311.Contig1_All	363	1	18	0.1295	2.3843	4.20254	Up	3.26366e-05	0.000222981
Unigene39876_All	365	1	18	0.1288	2.3713	4.20247	Up	3.26366e-05	0.000223031
CL3245.Contig1_All	377	1	18	0.1247	2.2958	4.20246	Up	3.26366e-05	0.000223105
CL11089.Contig2_All	530	1	18	0.0887	1.633	4.20245	Up	3.26366e-05	0.000222944
CL16651.Contig1_All	658	9	162	0.6431	11.8384	4.20229	Up	1.81207e-38	9.67245e-37
CL4485.Contig4_All	347	1	18	0.1355	2.4943	4.20227	Up	3.26366e-05	0.00022313
Unigene41444_All	429	1	18	0.1096	2.0175	4.20225	Up	3.26366e-05	0.000223093
CL2289.Contig12_All	1412	2	36	0.0666	1.2259	4.20218	Up	1.90964e-09	2.42344e-08
Unigene21725_All	779	3	54	0.1811	3.3332	4.20205	Up	1.25295e-13	2.31157e-12
Unigene28944_All	529	1	18	0.0889	1.6361	4.20193	Up	3.26366e-05	0.000223242
CL2125.Contig2_All	462	1	18	0.1018	1.8734	4.20185	Up	3.26366e-05	0.000223267
Unigene6759_All	585	1	18	0.0804	1.4795	4.20177	Up	3.26366e-05	0.000223006
Unigene10210_All	1005	2	36	0.0936	1.7224	4.20177	Up	1.90964e-09	2.42369e-08
Unigene22217_All	588	1	18	0.08	1.472	4.20163	Up	3.26366e-05	0.000223068
Unigene26841_All	1461	1	18	0.0322	0.5924	4.20144	Up	3.26366e-05	0.000223218
Unigene12717_All	1062	1	18	0.0443	0.815	4.20142	Up	3.26366e-05	0.000223081
Unigene3258_All	1444	1	18	0.0326	0.5994	4.20058	Up	3.26366e-05	0.00022323
CL17252.Contig1_All	786	6	107	0.3589	6.5458	4.18892	Up	8.55042e-26	3.02293e-24
Unigene11670_All	1096	10	178	0.429	7.8093	4.18614	Up	5.0044e-42	2.92904e-40
CL12369.Contig1_All	1588	13	230	0.3849	6.9643	4.17742	Up	7.99672e-54	5.98055e-52
CL9635.Contig2_All	1737	16	282	0.4331	7.8064	4.17189	Up	1.31141e-65	1.15826e-63
Unigene25319_All	877	2	35	0.1072	1.919	4.16198	Up	3.66972e-09	4.50494e-08
CL6409.Contig2_All	365	2	35	0.2576	4.6108	4.16181	Up	3.66972e-09	4.50584e-08
Unigene6339_All	858	2	35	0.1096	1.9615	4.16164	Up	3.66972e-09	4.5063e-08
CL4813.Contig3_All	1537	2	35	0.0612	1.095	4.16126	Up	3.66972e-09	4.50539e-08
CL9386.Contig2_All	1820	11	192	0.2842	5.0726	4.15775	Up	5.08692e-45	3.19568e-43
CL14772.Contig1_All	607	31	538	2.4011	42.6183	4.14971	Up	2.50002e-123	4.05639e-121
CL1308.Contig2_All	1191	3	52	0.1184	2.0994	4.14824	Up	4.61452e-13	8.18902e-12
CL9603.Contig2_All	3284	6	104	0.0859	1.5228	4.14792	Up	6.01744e-25	2.05965e-23
Unigene15785_All	524	3	52	0.2692	4.7717	4.14775	Up	4.61452e-13	8.18783e-12
CL13763.Contig2_All	612	13	224	0.9987	17.5994	4.13933	Up	3.93584e-52	2.85126e-50
CL9380.Contig1_All	2115	10	172	0.2223	3.9104	4.13674	Up	2.4674e-40	1.38145e-38
CL5402.Contig2_All	953	77	1324	3.7987	66.8032	4.13634	Up	2.29854e-300	8.96738e-298
Unigene3589_All	1921	32	547	0.7832	13.6919	4.1278	Up	6.66172e-125	1.09835e-122
CL17849.Contig1_All	1117	11	188	0.463	8.093	4.12759	Up	6.81912e-44	4.16221e-42
CL11978.Contig3_All	731	22	375	1.4149	24.667	4.12381	Up	4.63626e-86	5.29805e-84
CL17767.Contig13_All	1290	1	17	0.0364	0.6337	4.12179	Up	6.2869e-05	0.000406502
Unigene29714_All	2396	1	17	0.0196	0.3412	4.12169	Up	6.2869e-05	0.00040633
CL1707.Contig14_All	1233	1	17	0.0381	0.663	4.12115	Up	6.2869e-05	0.00040663
CL8891.Contig1_All	900	1	17	0.0522	0.9083	4.12105	Up	6.2869e-05	0.000406716
CL878.Contig26_All	1637	1	17	0.0287	0.4993	4.12078	Up	6.2869e-05	0.000406459
Unigene42373_All	488	1	17	0.0963	1.6751	4.12057	Up	6.2869e-05	0.000406201
CL8520.Contig1_All	939	2	34	0.1001	1.7411	4.12049	Up	7.04254e-09	8.3776e-08
Unigene20276_All	1049	1	17	0.0448	0.7792	4.12042	Up	6.2869e-05	0.000406695
Unigene25966_All	636	1	17	0.0739	1.2853	4.12039	Up	6.2869e-05	0.000406609
Unigene12742_All	576	1	17	0.0816	1.4192	4.12036	Up	6.2869e-05	0.000406116
CL11845.Contig4_All	1102	2	34	0.0853	1.4835	4.12032	Up	7.04254e-09	8.37923e-08
CL3762.Contig4_All	408	1	17	0.1152	2.0035	4.12031	Up	6.2869e-05	0.000406394
Unigene19071_All	384	1	17	0.1224	2.1287	4.1203	Up	6.2869e-05	0.000406287
CL7651.Contig2_All	1515	4	68	0.1241	2.1582	4.12025	Up	1.16865e-16	2.63601e-15
Unigene16648_All	257	1	17	0.1829	3.1807	4.12022	Up	6.2869e-05	0.000406759
Unigene43060_All	397	1	17	0.1184	2.059	4.1202	Up	6.2869e-05	0.000406437
CL8588.Contig1_All	385	1	17	0.1221	2.1232	4.12011	Up	6.2869e-05	0.000406673
CL2856.Contig3_All	882	1	17	0.0533	0.9268	4.12005	Up	6.2869e-05	0.000406544
Unigene10946_All	541	1	17	0.0869	1.511	4.12	Up	6.2869e-05	0.00040648
CL11197.Contig3_All	366	4	68	0.5138	8.9337	4.11998	Up	1.16865e-16	2.6365e-15
CL15089.Contig1_All	286	1	17	0.1644	2.8582	4.11982	Up	6.2869e-05	0.000406309
CL9875.Contig2_All	347	1	17	0.1355	2.3557	4.11979	Up	6.2869e-05	0.000406351
CL6467.Contig5_All	515	2	34	0.1826	3.1745	4.11977	Up	7.04254e-09	8.37841e-08
Unigene6547_All	474	1	17	0.0992	1.7245	4.11969	Up	6.2869e-05	0.000406266
Unigene10526_All	593	1	17	0.0793	1.3785	4.11963	Up	6.2869e-05	0.000406523
Unigene13843_All	344	1	17	0.1367	2.3763	4.11963	Up	6.2869e-05	0.000406781
Unigene15923_All	815	1	17	0.0577	1.003	4.11961	Up	6.2869e-05	0.000406416
Unigene10867_All	667	1	17	0.0705	1.2255	4.1196	Up	6.2869e-05	0.00040618
Unigene6711_All	475	1	17	0.099	1.7209	4.11959	Up	6.2869e-05	0.000406652
Unigene50604_All	468	1	17	0.1005	1.7466	4.11928	Up	6.2869e-05	0.000406738
CL14344.Contig2_All	575	1	17	0.0818	1.4216	4.11927	Up	6.2869e-05	0.000406587
Unigene22553_All	502	1	17	0.0937	1.6283	4.11917	Up	6.2869e-05	0.000406566
CL15562.Contig1_All	1027	1	17	0.0458	0.7959	4.11917	Up	6.2869e-05	0.000406159
Unigene4436_All	800	1	17	0.0588	1.0218	4.11915	Up	6.2869e-05	0.000406373
Unigene25246_All	560	1	17	0.084	1.4597	4.11914	Up	6.2869e-05	0.000406137
Unigene7026_All	634	1	17	0.0742	1.2893	4.11902	Up	6.2869e-05	0.000406223
Unigene13918_All	2022	3	51	0.0698	1.2128	4.11897	Up	8.84318e-13	1.53204e-11
CL5006.Contig1_All	1207	1	17	0.039	0.6772	4.11804	Up	6.2869e-05	0.000406244
CL1419.Contig3_All	1619	4028	68302	116.97	2028.57	4.11625	Up	0	0
CL16770.Contig3_All	1941	11	186	0.2664	4.6078	4.11241	Up	2.49244e-43	1.50039e-41
CL11904.Contig1_All	2736	4	67	0.0687	1.1775	4.09927	Up	2.23622e-16	4.95194e-15
CL3889.Contig3_All	1080	4	67	0.1741	2.983	4.09878	Up	2.23622e-16	4.95284e-15
CL3904.Contig1_All	1369	4	67	0.1374	2.3533	4.09823	Up	2.23622e-16	4.95373e-15
CL4319.Contig1_All	1212	4	67	0.1552	2.6581	4.09819	Up	2.23622e-16	4.95463e-15
CL6058.Contig4_All	3964	138	2300	1.6367	27.8995	4.09138	Up	0	0
Unigene36398_All	461	3	50	0.306	5.2152	4.09112	Up	1.69302e-12	2.86027e-11
CL15671.Contig1_All	916	402	6678	20.633	350.553	4.08661	Up	0	0
CL13763.Contig3_All	619	2	33	0.1519	2.5635	4.07692	Up	1.34962e-08	1.5562e-07
Unigene18115_All	958	4	66	0.1963	3.3127	4.07688	Up	4.27566e-16	9.30497e-15
CL2934.Contig1_All	945	2	33	0.0995	1.6791	4.07685	Up	1.34962e-08	1.55591e-07
CL9299.Contig5_All	262	2	33	0.3589	6.0564	4.07681	Up	1.34962e-08	1.55605e-07
CL17710.Contig5_All	453	2	33	0.2076	3.5028	4.07663	Up	1.34962e-08	1.55576e-07
Unigene1191_All	1633	45	740	1.2956	21.7895	4.07194	Up	9.01236e-167	1.99284e-164
Unigene12368_All	1329	82	1345	2.9008	48.6631	4.06831	Up	1.67343e-301	6.57045e-299
Unigene8921_All	991	10	164	0.4744	7.9574	4.06812	Up	4.3835e-38	2.3166e-36
CL10228.Contig2_All	942	3	49	0.1497	2.5012	4.06247	Up	3.23794e-12	5.34718e-11
CL3527.Contig1_All	1418	14	226	0.4642	7.6636	4.0452	Up	9.39906e-52	6.74519e-50
Unigene17330_All	1549	17	273	0.516	8.4745	4.03769	Up	3.91718e-62	3.31397e-60
CL698.Contig5_All	1948	1	16	0.0241	0.3949	4.03438	Up	0.000120803	0.000735662
CL11779.Contig2_All	883	1	16	0.0532	0.8713	4.03367	Up	0.000120803	0.000735443
Unigene3085_All	1019	1	16	0.0461	0.755	4.03364	Up	0.000120803	0.000736175
CL931.Contig3_All	1019	1	16	0.0461	0.755	4.03364	Up	0.000120803	0.00073537
Unigene19101_All	787	1	16	0.0597	0.9776	4.03344	Up	0.000120803	0.000735406
CL4001.Contig5_All	1523	2	32	0.0617	1.0103	4.03337	Up	2.5825e-08	2.88151e-07
Unigene12875_All	687	1	16	0.0684	1.1199	4.03323	Up	0.000120803	0.000735699
Unigene7244_All	604	1	16	0.0778	1.2738	4.03322	Up	0.000120803	0.000735882
CL3317.Contig1_All	571	1	16	0.0823	1.3474	4.03314	Up	0.000120803	0.000735114
CL6625.Contig2_All	1320	1	16	0.0356	0.5828	4.03305	Up	0.000120803	0.000736065
Unigene12323_All	739	1	16	0.0636	1.0411	4.03294	Up	0.000120803	0.000735772
Unigene26691_All	636	1	16	0.0739	1.2097	4.03293	Up	0.000120803	0.000735955
Unigene16185_All	612	1	16	0.0768	1.2571	4.03285	Up	0.000120803	0.000735845
Unigene21171_All	589	1	16	0.0798	1.3062	4.03284	Up	0.000120803	0.000735516
CL1522.Contig4_All	2013	4	64	0.0934	1.5288	4.03283	Up	1.5593e-15	3.28716e-14
CL11898.Contig3_All	777	1	16	0.0605	0.9902	4.03271	Up	0.000120803	0.000735918
CL10.Contig6_All	1274	1	16	0.0369	0.6039	4.03262	Up	0.000120803	0.000736102
CL17118.Contig2_All	511	1	16	0.092	1.5056	4.03256	Up	0.000120803	0.000735187
Unigene19680_All	322	1	16	0.146	2.3893	4.03255	Up	0.000120803	0.000736358
CL2866.Contig3_All	279	1	16	0.1685	2.7575	4.03254	Up	0.000120803	0.000735809
CL10781.Contig3_All	1502	5	80	0.1565	2.5611	4.03253	Up	4.04632e-19	1.05352e-17
Unigene16155_All	391	5	80	0.6012	9.8382	4.03248	Up	4.04632e-19	1.0533e-17
Unigene32038_All	609	1	16	0.0772	1.2633	4.03245	Up	0.000120803	0.000735333
Unigene12992_All	653	1	16	0.072	1.1782	4.03244	Up	0.000120803	0.000736285
Unigene25645_All	444	1	16	0.1059	1.7328	4.03233	Up	0.000120803	0.000735078
Unigene2355_All	632	1	16	0.0744	1.2173	4.03224	Up	0.000120803	0.000736211
Unigene41731_All	269	1	16	0.1748	2.86	4.03224	Up	0.000120803	0.000735151
CL3795.Contig5_All	1371	1	16	0.0343	0.5612	4.03223	Up	0.000120803	0.000736138
CL5437.Contig2_All	1242	5	80	0.1893	3.0972	4.03222	Up	4.04632e-19	1.05375e-17
Unigene19697_All	475	1	16	0.099	1.6197	4.03215	Up	0.000120803	0.000736028
Unigene41352_All	494	1	16	0.0952	1.5574	4.03203	Up	0.000120803	0.000735992
Unigene40262_All	368	1	16	0.1278	2.0906	4.03196	Up	0.000120803	0.000735736
Unigene28381_All	503	1	16	0.0935	1.5295	4.03195	Up	0.000120803	0.000736248
Unigene12560_All	390	1	16	0.1206	1.9727	4.03187	Up	0.000120803	0.00073526
Unigene13692_All	780	1	16	0.0603	0.9863	4.0318	Up	0.000120803	0.000735224
CL17680.Contig1_All	479	1	16	0.0982	1.6062	4.03178	Up	0.000120803	0.000735553
CL6477.Contig3_All	1139	1	16	0.0413	0.6755	4.03174	Up	0.000120803	0.000735626
Unigene28615_All	837	1	16	0.0562	0.9192	4.03174	Up	0.000120803	0.00073548
CL9916.Contig2_All	1723	1	16	0.0273	0.4465	4.03169	Up	0.000120803	0.000736321
CL2334.Contig2_All	1764	3	48	0.08	1.3084	4.03166	Up	6.18604e-12	9.98685e-11
CL7064.Contig5_All	788	1	16	0.0597	0.9763	4.03152	Up	0.000120803	0.000735589
CL11204.Contig1_All	1769	2	32	0.0532	0.8698	4.03119	Up	2.5825e-08	2.88125e-07
CL1567.Contig1_All	2211	1	16	0.0213	0.348	4.03016	Up	0.000120803	0.000735297
CL11382.Contig1_All	1194	93	1479	3.6619	59.5616	4.02372	Up	0	0
CL5044.Contig2_All	2265	31	493	0.6435	10.466	4.02363	Up	1.069e-110	1.55343e-108
CL8556.Contig6_All	2174	9	143	0.1946	3.1629	4.02266	Up	4.02758e-33	1.84928e-31
CL16208.Contig1_All	1100	8	127	0.3419	5.5515	4.02123	Up	1.47778e-29	5.97463e-28
CL14249.Contig2_All	1918	5	79	0.1226	1.9805	4.01383	Up	7.71474e-19	1.97672e-17
CL13265.Contig2_All	1204	12	187	0.4686	7.4682	3.99433	Up	1.10481e-42	6.55408e-41
CL13849.Contig1_All	1068	2	31	0.088	1.3957	3.98734	Up	4.93382e-08	5.30923e-07
Unigene14127_All	1216	2	31	0.0773	1.2258	3.98711	Up	4.93382e-08	5.30876e-07
CL4011.Contig1_All	1614	4	62	0.1165	1.8471	3.98686	Up	5.66728e-15	1.14981e-13
CL1013.Contig1_All	1935	8	124	0.1944	3.0814	3.98649	Up	1.01977e-28	4.00139e-27
Unigene30838_All	1419	8	124	0.2651	4.2019	3.98643	Up	1.01977e-28	4.00267e-27
Unigene9055_All	1800	9	139	0.2351	3.7132	3.98132	Up	5.2869e-32	2.33811e-30
Unigene30686_All	1933	57	876	1.3864	21.7909	3.97431	Up	1.20343e-193	3.04593e-191
CL14908.Contig1_All	1078	3	46	0.1308	2.0518	3.97146	Up	2.2503e-11	3.46227e-10
Unigene4127_All	1666	6	92	0.1693	2.6553	3.97122	Up	1.40738e-21	4.14538e-20
CL2289.Contig7_All	1565	22	337	0.6609	10.3542	3.96964	Up	2.03466e-75	2.05992e-73
CL41.Contig3_All	835	10	153	0.563	8.8106	3.96803	Up	5.24046e-35	2.54648e-33
Unigene31279_All	1241	4	61	0.1515	2.3635	3.96354	Up	1.07899e-14	2.13777e-13
Unigene29713_All	2125	4	61	0.0885	1.3803	3.96316	Up	1.07899e-14	2.13811e-13
CL16966.Contig3_All	2104	30	457	0.6704	10.4441	3.96152	Up	1.43382e-101	1.92594e-99
Unigene14897_All	1804	31	472	0.8079	12.5808	3.9609	Up	7.74e-105	1.06416e-102
CL1211.Contig4_All	1452	12	182	0.3885	6.0271	3.95548	Up	2.7416e-41	1.57087e-39
Unigene30292_All	934	49	743	2.4665	38.2511	3.95496	Up	6.58806e-164	1.42086e-161
CL5402.Contig1_All	964	109	1651	5.316	82.3517	3.95339	Up	0	0
Unigene8783_All	1584	11	166	0.3265	5.0391	3.94801	Up	9.90386e-38	5.18037e-36
CL11484.Contig2_All	2347	118	1778	2.3637	36.4268	3.94588	Up	0	0
CL2289.Contig18_All	1928	15	226	0.3658	5.6364	3.94565	Up	7.70212e-51	5.40392e-49
CL1211.Contig2_All	3150	27	406	0.403	6.1975	3.94283	Up	4.2787e-90	5.06914e-88
CL8193.Contig3_All	2106	2	30	0.0446	0.685	3.94099	Up	9.41018e-08	9.7535e-07
CL16838.Contig2_All	1098	2	30	0.0856	1.3138	3.93999	Up	9.41018e-08	9.74772e-07
Unigene25035_All	910	2	30	0.1033	1.5852	3.93975	Up	9.41018e-08	9.75102e-07
CL14904.Contig10_All	997	2	30	0.0943	1.4469	3.93956	Up	9.41018e-08	9.74937e-07
CL14808.Contig2_All	1660	5	75	0.1416	2.1725	3.93946	Up	1.01208e-17	2.44106e-16
CL14228.Contig1_All	351	2	30	0.2679	4.1098	3.9393	Up	9.41018e-08	9.75515e-07
CL16516.Contig4_All	262	2	30	0.3589	5.5058	3.9393	Up	9.41018e-08	9.75267e-07
Unigene7150_All	1332	3	45	0.1059	1.6245	3.93922	Up	4.28436e-11	6.42009e-10
CL8731.Contig2_All	1219	4	60	0.1543	2.3667	3.93907	Up	2.05236e-14	3.9952e-13
Unigene22695_All	797	2	30	0.118	1.8099	3.93905	Up	9.41018e-08	9.75185e-07
Unigene40695_All	586	2	30	0.1605	2.4616	3.93895	Up	9.41018e-08	9.74855e-07
CL10751.Contig1_All	1206	2	30	0.078	1.1961	3.93872	Up	9.41018e-08	9.75432e-07
CL4881.Contig7_All	925	2	30	0.1017	1.5595	3.93869	Up	9.41018e-08	9.7502e-07
CL9610.Contig1_All	2214	15	224	0.3185	4.8649	3.93304	Up	2.7737e-50	1.9273e-48
CL9635.Contig1_All	2038	80	1189	1.8455	28.0531	3.92608	Up	8.14024e-260	2.75468e-257
CL10449.Contig1_All	818	6	89	0.3448	5.2317	3.92345	Up	9.65712e-21	2.72899e-19
CL6935.Contig4_All	433	6	89	0.6515	9.8834	3.92317	Up	9.65712e-21	2.72836e-19
CL6248.Contig4_All	1862	10	148	0.2525	3.8219	3.91993	Up	1.29323e-33	6.02828e-32
CL2289.Contig14_All	2119	17	251	0.3772	5.6957	3.91647	Up	5.35118e-56	4.11765e-54
CL13675.Contig2_All	549	127	1873	10.8759	164.047	3.9149	Up	0	0
CL14739.Contig2_All	1645	31	457	0.886	13.3583	3.91429	Up	1.14619e-100	1.52454e-98
CL11674.Contig3_All	507	7	103	0.6491	9.7686	3.91164	Up	9.32748e-24	3.01328e-22
CL1583.Contig1_All	2531	22	323	0.4087	6.1364	3.90828	Up	1.59299e-71	1.51982e-69
CL10506.Contig2_All	326	3	44	0.4326	6.4899	3.90709	Up	8.14684e-11	1.18796e-09
CL15323.Contig2_All	2050	3	44	0.0688	1.0321	3.90703	Up	8.14684e-11	1.18852e-09
Unigene1667_All	633	3	44	0.2228	3.3423	3.90702	Up	8.14684e-11	1.18838e-09
CL1260.Contig3_All	1131	3	44	0.1247	1.8706	3.90697	Up	8.14684e-11	1.1881e-09
CL13077.Contig1_All	992	3	44	0.1422	2.1328	3.90676	Up	8.14684e-11	1.18824e-09
CL2073.Contig2_All	1978	28	410	0.6655	9.9669	3.90463	Up	2.62064e-90	3.11381e-88
CL6483.Contig1_All	1990	5	73	0.1181	1.7639	3.90069	Up	3.6489e-17	8.49321e-16
CL5710.Contig3_All	1978	277	4036	6.5839	98.1132	3.89743	Up	0	0
CL7475.Contig3_All	2363	13	189	0.2586	3.8459	3.89453	Up	2.42202e-42	1.42714e-40
CL14345.Contig2_All	1127	2	29	0.0834	1.2373	3.891	Up	1.7916e-07	1.78841e-06
CL7501.Contig1_All	1111	2	29	0.0846	1.2551	3.891	Up	1.7916e-07	1.78812e-06
Unigene11738_All	1067	2	29	0.0881	1.3069	3.89086	Up	1.7916e-07	1.78754e-06
Unigene37148_All	542	2	29	0.1735	2.5728	3.89033	Up	1.7916e-07	1.78739e-06
CL2880.Contig1_All	848	2	29	0.1109	1.6444	3.89023	Up	1.7916e-07	1.78856e-06
CL3887.Contig1_All	704	2	29	0.1336	1.9807	3.89002	Up	1.7916e-07	1.78798e-06
CL13103.Contig1_All	852	2	29	0.1104	1.6367	3.88998	Up	1.7916e-07	1.78827e-06
Unigene16043_All	778	2	29	0.1209	1.7923	3.88993	Up	1.7916e-07	1.78769e-06
CL760.Contig6_All	2531	2	29	0.0372	0.5509	3.88842	Up	1.7916e-07	1.78783e-06
CL11497.Contig1_All	2151	14	202	0.306	4.5156	3.88331	Up	4.59474e-45	2.89093e-43
Unigene3262_All	1080	5	72	0.2177	3.2056	3.88018	Up	6.91998e-17	1.5854e-15
Unigene6576_All	1004	8	115	0.3746	5.5077	3.87803	Up	3.26446e-26	1.17239e-24
CL5030.Contig3_All	958	3	43	0.1472	2.1583	3.87405	Up	1.54714e-10	2.19768e-09
CL7156.Contig1_All	427	23	328	2.5324	36.9359	3.86645	Up	5.05176e-72	4.86901e-70
CL17798.Contig1_All	301	5	71	0.781	11.3421	3.86022	Up	1.31125e-16	2.94734e-15
Unigene15635_All	931	6	85	0.303	4.3901	3.85686	Up	1.24735e-19	3.3305e-18
Unigene49287_All	821	6	85	0.3436	4.9783	3.85685	Up	1.24735e-19	3.33122e-18
CL15290.Contig2_All	1543	3347	47413	101.982	1477.52	3.8568	Up	0	0
CL2609.Contig3_All	498	7	99	0.6608	9.5589	3.85456	Up	1.20208e-22	3.70833e-21
CL7148.Contig1_All	935	7	99	0.352	5.0913	3.85439	Up	1.20208e-22	3.70739e-21
CL15631.Contig2_All	716	8	113	0.5253	7.5887	3.85264	Up	1.16965e-25	4.1162e-24
CL17710.Contig1_All	3126	32	452	0.4813	6.9527	3.85257	Up	2.14736e-98	2.78366e-96
CL2784.Contig3_All	1989	31	436	0.7328	10.5403	3.84635	Up	7.5025e-95	9.32121e-93
Unigene1331_All	1206	4	56	0.1559	2.2328	3.84016	Up	2.66014e-13	4.79083e-12
CL9042.Contig2_All	553	2	28	0.17	2.4346	3.84008	Up	3.40458e-07	3.26651e-06
Unigene22648_All	736	3	42	0.1916	2.7439	3.84006	Up	2.93414e-10	4.05138e-09
CL16495.Contig1_All	962	3	42	0.1466	2.0993	3.83995	Up	2.93414e-10	4.05183e-09
Unigene18938_All	1122	2	28	0.0838	1.2	3.83994	Up	3.40458e-07	3.26804e-06
Unigene17201_All	563	2	28	0.167	2.3914	3.83994	Up	3.40458e-07	3.26728e-06
CL3769.Contig2_All	868	8	112	0.4333	6.2044	3.83985	Up	2.21216e-25	7.72503e-24
CL11502.Contig1_All	1692	8	112	0.2223	3.1829	3.83976	Up	2.21216e-25	7.72283e-24
Unigene31860_All	453	2	28	0.2076	2.9721	3.8396	Up	3.40458e-07	3.26753e-06
CL15067.Contig1_All	733	2	28	0.1283	1.8368	3.8396	Up	3.40458e-07	3.26625e-06
CL4823.Contig1_All	688	2	28	0.1367	1.9569	3.83948	Up	3.40458e-07	3.266e-06
CL3398.Contig4_All	551	2	28	0.1707	2.4435	3.83941	Up	3.40458e-07	3.26676e-06
CL1033.Contig6_All	661	2	28	0.1423	2.0368	3.8393	Up	3.40458e-07	3.26702e-06
Unigene28493_All	956	2	28	0.0984	1.4083	3.83915	Up	3.40458e-07	3.26574e-06
CL13259.Contig2_All	1415	2	28	0.0665	0.9515	3.83878	Up	3.40458e-07	3.26779e-06
CL8185.Contig9_All	1552	14	195	0.4241	6.0415	3.83243	Up	3.97422e-43	2.38301e-41
CL8738.Contig2_All	1627	8	111	0.2312	3.2805	3.8267	Up	4.18148e-25	1.44171e-23
CL11382.Contig2_All	1332	181	2506	6.3886	90.4647	3.82378	Up	0	0
CL2289.Contig16_All	1215	31	428	1.1995	16.9383	3.81978	Up	1.21162e-92	1.47687e-90
CL4948.Contig1_All	1518	5	69	0.1549	2.1856	3.81862	Up	4.69576e-16	1.01903e-14
CL3889.Contig1_All	667	4	55	0.2819	3.965	3.81407	Up	5.03412e-13	8.90398e-12
CL6058.Contig3_All	4117	36	495	0.4111	5.7813	3.81383	Up	9.10428e-107	1.27901e-104
CL14013.Contig2_All	554	4	55	0.3395	4.7737	3.81362	Up	5.03412e-13	8.9027e-12
CL2525.Contig3_All	575	15	206	1.2265	17.2267	3.81203	Up	2.68322e-45	1.69695e-43
CL3795.Contig1_All	1376	26	357	0.8884	12.4753	3.81172	Up	2.06956e-77	2.14126e-75
CL6028.Contig1_All	1164	11	151	0.4443	6.2377	3.81141	Up	1.42687e-33	6.64365e-32
CL5710.Contig2_All	1285	301	4126	11.0127	154.393	3.80937	Up	0	0
Unigene14181_All	1325	3	41	0.1064	1.4879	3.80571	Up	5.55674e-10	7.4705e-09
Unigene7229_All	1385	3	41	0.1018	1.4234	3.80553	Up	5.55674e-10	7.46804e-09
Unigene1825_All	488	3	41	0.289	4.0399	3.80518	Up	5.55674e-10	7.46722e-09
Unigene19361_All	880	3	41	0.1603	2.2403	3.80485	Up	5.55674e-10	7.46886e-09
Unigene9650_All	894	3	41	0.1578	2.2052	3.80474	Up	5.55674e-10	7.46968e-09
CL2289.Contig4_All	1500	19	259	0.5955	8.3025	3.80137	Up	1.86084e-56	1.43912e-54
Unigene447_All	644	5	68	0.365	5.0772	3.79806	Up	8.87422e-16	1.89789e-14
CL17252.Contig2_All	717	12	163	0.7869	10.9313	3.79614	Up	5.05204e-36	2.53019e-34
CL10954.Contig5_All	660	9	122	0.6411	8.8883	3.79329	Up	2.75764e-27	1.02773e-25
Unigene6852_All	1270	2	27	0.074	1.0223	3.78815	Up	6.45674e-07	5.93727e-06
CL12275.Contig1_All	1055	2	27	0.0891	1.2306	3.78779	Up	6.45674e-07	5.93906e-06
CL5948.Contig3_All	416	2	27	0.226	3.1208	3.78752	Up	6.45674e-07	5.93772e-06
CL1043.Contig16_All	943	2	27	0.0997	1.3767	3.78748	Up	6.45674e-07	5.93861e-06
CL13257.Contig2_All	1096	16	216	0.6863	9.4764	3.78743	Up	3.41318e-47	2.24074e-45
CL7651.Contig3_All	1204	2	27	0.0781	1.0783	3.78729	Up	6.45674e-07	5.93816e-06
CL3338.Contig3_All	3068	420	5659	6.4361	88.6925	3.78455	Up	0	0
CL4096.Contig2_All	1863	1110	14914	28.0119	384.932	3.78049	Up	0	0
Unigene8811_All	1160	202	2713	8.187	112.459	3.77992	Up	0	0
CL2656.Contig7_All	1243	10	134	0.3782	5.1837	3.77676	Up	9.66652e-30	3.93804e-28
CL15476.Contig6_All	1641	20	268	0.573	7.8529	3.77662	Up	4.47902e-58	3.56291e-56
CL17228.Contig2_All	2109	5	67	0.1115	1.5276	3.77615	Up	1.67551e-15	3.5279e-14
CL16099.Contig1_All	2097	56	747	1.2555	17.1287	3.77008	Up	7.83378e-159	1.63484e-156
CL9463.Contig1_All	1683	3	40	0.0838	1.1428	3.76948	Up	1.05079e-09	1.37043e-08
Unigene9638_All	726	3	40	0.1943	2.6493	3.76925	Up	1.05079e-09	1.37028e-08
CL15291.Contig3_All	1142	4	53	0.1647	2.2316	3.76017	Up	1.79669e-12	3.03082e-11
CL3407.Contig6_All	1728	8	106	0.2177	2.9496	3.76011	Up	1.00009e-23	3.22318e-22
CL7671.Contig9_All	2172	16	211	0.3463	4.6712	3.7537	Up	8.08682e-46	5.16233e-44
CL15656.Contig2_All	1572	15	197	0.4486	6.0258	3.74765	Up	8.03396e-43	4.78685e-41
Unigene31241_All	1438	8	105	0.2616	3.511	3.74645	Up	1.88355e-23	6.01039e-22
CL16166.Contig2_All	3438	16	209	0.2188	2.9231	3.73981	Up	2.86182e-45	1.80897e-43
Unigene23916_All	677	3	39	0.2083	2.77	3.73315	Up	1.98402e-09	2.51288e-08
CL3894.Contig2_All	836	3	39	0.1687	2.2432	3.73303	Up	1.98402e-09	2.51314e-08
CL2017.Contig2_All	1019	3	39	0.1384	1.8403	3.73303	Up	1.98402e-09	2.5134e-08
Unigene2327_All	812	3	39	0.1737	2.3095	3.73291	Up	1.98402e-09	2.51366e-08
Unigene2236_All	905	2	26	0.1039	1.3814	3.73286	Up	1.22189e-06	1.07354e-05
CL10112.Contig2_All	1540	37	481	1.1296	15.0185	3.73286	Up	4.60926e-102	6.26685e-100
CL5238.Contig3_All	651	8	104	0.5778	7.6817	3.73278	Up	3.54518e-23	1.11873e-21
CL12580.Contig2_All	906	4	52	0.2076	2.7598	3.73269	Up	3.38822e-12	5.58332e-11
Unigene31423_All	874	2	26	0.1076	1.4304	3.73267	Up	1.22189e-06	1.07385e-05
Unigene19226_All	791	2	26	0.1189	1.5805	3.73256	Up	1.22189e-06	1.0737e-05
CL8770.Contig2_All	1241	2	26	0.0758	1.0074	3.73229	Up	1.22189e-06	1.07393e-05
Unigene7178_All	1036	2	26	0.0908	1.2067	3.73223	Up	1.22189e-06	1.07362e-05
CL17883.Contig11_All	1491	2	26	0.0631	0.8385	3.7321	Up	1.22189e-06	1.07377e-05
CL2289.Contig9_All	2289	17	220	0.3492	4.6215	3.72624	Up	1.91877e-47	1.26577e-45
CL4330.Contig4_All	2059	29	374	0.6622	8.7341	3.72132	Up	1.61777e-79	1.71436e-77
CL7331.Contig3_All	729	6	77	0.387	5.0789	3.71411	Up	2.00698e-17	4.7509e-16
CL12250.Contig1_All	1693	10	128	0.2777	3.6354	3.71052	Up	4.29368e-28	1.64524e-26
CL16658.Contig2_All	1227	5	64	0.1916	2.5081	3.71043	Up	1.1211e-14	2.21798e-13
CL11498.Contig4_All	1243	8	102	0.3026	3.9458	3.70483	Up	1.25343e-22	3.86283e-21
CL6736.Contig1_All	826	4	51	0.2277	2.9689	3.70472	Up	6.38158e-12	1.02755e-10
CL162.Contig1_All	536	4	51	0.3509	4.5752	3.7047	Up	6.38158e-12	1.02809e-10
CL17094.Contig2_All	1879	8	102	0.2002	2.6102	3.70465	Up	1.25343e-22	3.86186e-21
CL15476.Contig3_All	3156	4	51	0.0596	0.777	3.70453	Up	6.38158e-12	1.02795e-10
CL18091.Contig3_All	2234	4	51	0.0842	1.0977	3.70452	Up	6.38158e-12	1.02782e-10
CL4881.Contig13_All	1889	4	51	0.0996	1.2982	3.70422	Up	6.38158e-12	1.02768e-10
CL11978.Contig1_All	627	43	548	3.2243	42.0257	3.70421	Up	2.43982e-115	3.68536e-113
Unigene30290_All	829	31	395	1.7581	22.911	3.70395	Up	1.39445e-83	1.56145e-81
CL3477.Contig5_All	1411	7	89	0.2332	3.033	3.70111	Up	6.84374e-20	1.85563e-18
CL10923.Contig2_All	630	7	89	0.5224	6.7928	3.70078	Up	6.84374e-20	1.85604e-18
Unigene30318_All	2169	94	1195	2.0375	26.4918	3.70067	Up	2.74588e-249	9.01812e-247
CL8853.Contig4_All	765	13	165	0.7989	10.3711	3.69841	Up	9.94142e-36	4.92456e-34
CL15376.Contig2_All	3167	3	38	0.0445	0.5769	3.69644	Up	3.74e-09	4.588e-08
CL11275.Contig2_All	1225	3	38	0.1151	1.4916	3.6959	Up	3.74e-09	4.58892e-08
CL3079.Contig4_All	1817	3	38	0.0776	1.0056	3.69586	Up	3.74e-09	4.58846e-08
Unigene29721_All	1754	3	38	0.0804	1.0417	3.6956	Up	3.74e-09	4.58754e-08
Unigene21636_All	1101	9	114	0.3843	4.9787	3.69546	Up	4.3447e-25	1.4963e-23
CL6157.Contig4_All	983	83	1042	3.9697	50.9702	3.68255	Up	9.80418e-217	2.81272e-214
Unigene5160_All	2518	2	25	0.0373	0.4774	3.67795	Up	2.30706e-06	1.94387e-05
CL5844.Contig8_All	2102	2	25	0.0447	0.5719	3.67742	Up	2.30706e-06	1.94187e-05
Unigene22190_All	1289	2	25	0.0729	0.9326	3.67727	Up	2.30706e-06	1.9424e-05
CL16101.Contig2_All	1358	2	25	0.0692	0.8852	3.67716	Up	2.30706e-06	1.94307e-05
CL2289.Contig15_All	1473	2	25	0.0638	0.8161	3.67712	Up	2.30706e-06	1.94254e-05
CL9500.Contig1_All	1026	2	25	0.0916	1.1716	3.67699	Up	2.30706e-06	1.9432e-05
CL10590.Contig2_All	700	2	25	0.1343	1.7173	3.67661	Up	2.30706e-06	1.94267e-05
Unigene30502_All	1397	2	25	0.0673	0.8605	3.6765	Up	2.30706e-06	1.94173e-05
Unigene18771_All	520	2	25	0.1808	2.3117	3.67649	Up	2.30706e-06	1.94401e-05
Unigene16946_All	370	2	25	0.2541	3.2489	3.67648	Up	2.30706e-06	1.9428e-05
CL14115.Contig1_All	498	2	25	0.1888	2.4139	3.67644	Up	2.30706e-06	1.94414e-05
Unigene31076_All	763	6	75	0.3697	4.7265	3.67635	Up	7.08814e-17	1.62271e-15
CL9600.Contig2_All	762	2	25	0.1234	1.5776	3.67632	Up	2.30706e-06	1.942e-05
Unigene6872_All	720	2	25	0.1306	1.6696	3.67628	Up	2.30706e-06	1.94227e-05
Unigene19901_All	463	2	25	0.2031	2.5963	3.67619	Up	2.30706e-06	1.94374e-05
Unigene22255_All	759	2	25	0.1239	1.5838	3.67614	Up	2.30706e-06	1.94427e-05
Unigene14466_All	517	2	25	0.1819	2.3252	3.67614	Up	2.30706e-06	1.94347e-05
Unigene7838_All	283	2	25	0.3323	4.2477	3.67612	Up	2.30706e-06	1.94294e-05
Unigene25767_All	645	2	25	0.1458	1.8637	3.67611	Up	2.30706e-06	1.94334e-05
Unigene12606_All	863	2	25	0.109	1.3929	3.67569	Up	2.30706e-06	1.94213e-05
CL8216.Contig4_All	1708	2	25	0.0551	0.7038	3.67504	Up	2.30706e-06	1.9436e-05
CL13573.Contig3_All	3052	21	262	0.3235	4.1278	3.67354	Up	1.36675e-55	1.04644e-53
CL7724.Contig3_All	1270	13	162	0.4813	6.1336	3.67173	Up	6.56314e-35	3.1766e-33
CL5831.Contig5_All	1536	44	548	1.3468	17.155	3.67102	Up	1.66579e-114	2.48554e-112
CL10733.Contig1_All	2180	14	174	0.3019	3.8379	3.66817	Up	2.31938e-37	1.20394e-35
CL7850.Contig2_All	1105	53	658	2.255	28.6329	3.66647	Up	5.1483e-137	9.18016e-135
Unigene28576_All	879	5	62	0.2674	3.3916	3.66489	Up	3.96026e-14	7.57321e-13
CL12446.Contig3_All	1809	10	124	0.2599	3.296	3.66469	Up	5.32748e-27	1.96043e-25
CL8556.Contig5_All	2151	29	359	0.6339	8.0252	3.66221	Up	2.01984e-75	2.0466e-73
CL3986.Contig2_All	2619	8	99	0.1436	1.8176	3.66191	Up	8.29028e-22	2.47099e-20
Unigene1762_All	1892	3	37	0.0745	0.9403	3.65781	Up	7.0382e-09	8.37732e-08
CL2555.Contig3_All	2797	3	37	0.0504	0.6361	3.65776	Up	7.0382e-09	8.37569e-08
CL15429.Contig3_All	1184	6	74	0.2382	3.0053	3.65726	Up	1.33025e-16	2.98895e-15
Unigene7968_All	1472	3	37	0.0958	1.2086	3.65717	Up	7.0382e-09	8.3765e-08
Unigene21444_All	1159	17	209	0.6896	8.6709	3.65235	Up	1.94184e-44	1.20506e-42
CL9501.Contig2_All	1834	4	49	0.1025	1.2847	3.64774	Up	2.25494e-11	3.46854e-10
CL7759.Contig2_All	1903	12	147	0.2965	3.7143	3.64699	Up	1.22544e-31	5.33853e-30
[truncated: 13,028 more rows]

## Sheet: A1 vs A5
GeneID	Length (bp)	CK-Expression	Salt Stressed Expression	CK Expression normalized	Salt Stressed Expression normalized	log2 Ratio	Up/Down(HT/HCK)	P-value	FDR
[truncated: 19,238 more rows]

[truncated: 1 more sheets: A1 vs A6]
